# Supplementary material for: The CO-Regulation Database (CORD): A Tool to Identify Coordinately Expressed Genes
Source: PLoS One. 2014 Mar 5;9(3):e90408. doi: 10.1371/journal.pone.0090408 (PMC3944024; doi:10.1371/journal.pone.0090408)
Supplement: File S1 — An Excel file (CDKNA2.xls) containing the CORD results for CDKNA2 using the following settings: human and mouse experiments used, p value of less than 0.01, fold change threshold of greater than 2, tissue comparisions included, and the minimum number of samples per experiment is 3. (XLS) [file pone.0090408.s002.xls]

## Sheet: Experiments
CordID	Database	Datbase ID	Fold Change	Species	Title	Factor	Group 1	Group 2
GDS3113_tissue_12_19_mod.txt	GEO	GDS3113	-1.53206272181	Homo sapiens	Various normal tissues	tissue	lung	retina
E-GEOD-37290_32_1_3_mod.txt	ArrayExpress	E-GEOD-37290	-1.29838959684	Homo sapiens	Expression Data from HNF1b-knockdown RMG2-ovarian cancer cells	FactorValue..TRANSFECTED.WITH.	HNF1b-targeting shRNA (clones V2LHS_196459)	non-silencing control
E-GEOD-24705_38_3_7_mod.txt	ArrayExpress	E-GEOD-24705	-1.43703544983	Mus musculus	mRNA expression data from iPSCs	FactorValue..CELL.LINE.	iPS cell line iPSM1_8	ntES cells cell line NTM2_4
E-GEOD-36643_30_1_3_mod.txt	ArrayExpress	E-GEOD-36643	2.25904027499	Homo sapiens	Ganglioside GD2 identifies Breast Cancer Stem Cells: Targeting GD3 Synthase Inhibits GD2 Expression and Tumor Growth	FactorValue..FACS.SORTED.CELL.POPULATION.	CD24_high	GD2-
GDS2819_individual_3_9_mod.txt	GEO	GDS2819	-1.52541298026	Homo sapiens	Leukemic white blood cells and various RNA preparation protocols	individual	patient 11	patient 17
E-GEOD-21447_43_6_7_mod.txt	ArrayExpress	E-GEOD-21447	-3.8014836379	Mus musculus	A global expression switch marks pachytene initiation during mouse male meiosis	FactorValue..MEIOTIC.FRACTION.	pre-leptotene	round spermatids
GDS3113_tissue_8_26_mod.txt	GEO	GDS3113	2.1172712758	Homo sapiens	Various normal tissues	tissue	fetal thymus	testis
GDS1479_specimen_2_4_mod.txt	GEO	GDS1479	-1.15238667597	Homo sapiens	Carcinoma in situ lesions of the urinary bladder	specimen	muscle invasive carcinoma	normal urothelium
GDS2819_individual_2_26_mod.txt	GEO	GDS2819	5.42245691727	Homo sapiens	Leukemic white blood cells and various RNA preparation protocols	individual	patient 10	patient 8
E-GEOD-17906_35_3_4_mod.txt	ArrayExpress	E-GEOD-17906	-4.28164706153	Homo sapiens	Transcription profiling by array of human CD90 positive prostate stromal fibromuscular tumor cells	Factor.Value.cell.type.	CD26 positive	CD49a positive
E-GEOD-20667_35_2_4_mod.txt	ArrayExpress	E-GEOD-20667	-1.6305086008	Homo sapiens	The Notch/Hes1 pathway sustains NF-B activation through CYLD repression in T cell leukemia	FactorValue..CELL.LINE.	ACC525 [DND41]	JCRB0086 [TALL-1]
GDS2545_tissue_1_4_mod.txt	GEO	GDS2545	-1.28043379711	Homo sapiens	Metastatic prostate cancer (HG-U95A)	tissue	metastatic prostate tumor	primary prostate tumor
GDS2819_individual_18_21_mod.txt	GEO	GDS2819	-4.35500821314	Homo sapiens	Leukemic white blood cells and various RNA preparation protocols	individual	patient 25	patient 3
E-GEOD-16615_46_2_10_mod.txt	ArrayExpress	E-GEOD-16615	-1.39420181382	Homo sapiens	gene expression in human subcutaneous adipose tissue after CLA intervention	FactorValue..SUBJECT.	2	10
E-GEOD-19732_23_2_3_mod.txt	ArrayExpress	E-GEOD-19732	1.28655477199	Mus musculus	Identification of genes characteristic of committed preadipocyte fibroblasts	Factor.Value..CELL.LINE.	Swiss2	Swiss22
E-GEOD-37316_40_1_3_mod.txt	ArrayExpress	E-GEOD-37316	-1.9433963054	Mus musculus	Gene expression data from postnatal day 7 subventricular zone (SVZ)	FactorValue..VARIATION.	not specified	Ptch het p53 wt
GDS1490_tissue_3_28_mod.txt	GEO	GDS1490	1.44335179252	Mus musculus	Neural tissue profiling	tissue	bed nucleus stria terminalis	spinal cord
GDS2819_individual_2_13_mod.txt	GEO	GDS2819	4.97328400187	Homo sapiens	Leukemic white blood cells and various RNA preparation protocols	individual	patient 10	patient 20
GDS1490_tissue_1_18_mod.txt	GEO	GDS1490	1.25110940954	Mus musculus	Neural tissue profiling	tissue	adrenal	medulla oblongata
GDS2428_specimen_2_3_mod.txt	GEO	GDS2428	-5.08594073955	Homo sapiens	DNA demethylation effect on glioblastoma cultures	specimen	GLI60	GLI72
E-GEOD-24207_47_14_16_mod.txt	ArrayExpress	E-GEOD-24207	-1.53787260273	Mus musculus	mRNA analysis in different mouse tissues	FactorValue..TISSUE.	pancreatic acini	pituitary gland
E-GEOD-29328_31_1_2_mod.txt	ArrayExpress	E-GEOD-29328	-3.66602679631	Mus musculus	Expression data from squamous cell carcinoma stem cells	FactorValue..CELL.TYPE.	cutaneous squamous cell carcinoma	hair follicle bulge
E-GEOD-29328_32_3_5_mod.txt	ArrayExpress	E-GEOD-29328	-3.50409479041	Mus musculus	Expression data from squamous cell carcinoma stem cells	FactorValue..GENOTYPE.	K14cre;TbRII(fl/fl);FAK(fl/fl)	wild type
E-GEOD-16615_46_2_4_mod.txt	ArrayExpress	E-GEOD-16615	-1.33155097428	Homo sapiens	gene expression in human subcutaneous adipose tissue after CLA intervention	FactorValue..SUBJECT.	2	4
E-GEOD-33199_29_3_10_mod.txt	ArrayExpress	E-GEOD-33199	-2.88577340954	Mus musculus	A mouse model of the most aggressive subgroup of human medulloblastoma [Mouse430 2]	FactorValue..VARIATION.	cmyc MB - GFP positive	Ptc+/-, Cdkn2c-/-
E-MEXP-3020_33_1_2_mod.txt	ArrayExpress	E-MEXP-3020	-1.72712688116	Homo sapiens	Low Dose PDT - Human Cells	Factor.Value..CELL_LINE.	DU145	PC3
E-GEOD-33199_29_2_10_mod.txt	ArrayExpress	E-GEOD-33199	-2.6471289721	Mus musculus	A mouse model of the most aggressive subgroup of human medulloblastoma [Mouse430 2]	FactorValue..VARIATION.	cmyc MB - GFP negative	Ptc+/-, Cdkn2c-/-
E-GEOD-24207_47_2_14_mod.txt	ArrayExpress	E-GEOD-24207	1.14615037911	Mus musculus	mRNA analysis in different mouse tissues	FactorValue..TISSUE.	adrenal gland	pancreatic acini
GDS3113_tissue_13_28_mod.txt	GEO	GDS3113	-3.93343664188	Homo sapiens	Various normal tissues	tissue	mammary gland	thyroid
GDS3113_tissue_1_2_mod.txt	GEO	GDS3113	-1.753891809	Homo sapiens	Various normal tissues	tissue	adrenal gland	bone marrow
E-GEOD-24547_44_4_5_mod.txt	ArrayExpress	E-GEOD-24547	5.40639712245	Homo sapiens	Transcriptional pathway signatures for the Aurora inhibitor Danusertib	FactorValue..CELL.LINE.	MCF7	MDA-MB-468
E-TABM-672_24_6_9_mod.txt	ArrayExpress	E-TABM-672	1.25472652506	Mus musculus	Transcription profiling of mouse embyronic stem cell line CGR8 during the first 10 days of differentiation into embryoid bodies	Factor.Value..Age.	5	10
E-GEOD-14519_33_3_4_mod.txt	ArrayExpress	E-GEOD-14519	2.93013690462	Homo sapiens	Transcription profiling by array of human multiple myeloma cell lines after treatment with arsenic	Factor.Value.cell.line.	MM.1s	U266
E-GEOD-15303_32_1_3_mod.txt	ArrayExpress	E-GEOD-15303	1.33578074387	Mus musculus	Identification of Myelin-gene Regulatory Factor as a Critical Transcriptional Regulator Required for CNS Myelination	FactorValue..GENOTYPE.	Myelin-gene Regulatory Factor conditional knockout	not specified
GDS3113_tissue_11_13_mod.txt	GEO	GDS3113	2.11175200503	Homo sapiens	Various normal tissues	tissue	liver	mammary gland
E-GEOD-34126_41_2_3_mod.txt	ArrayExpress	E-GEOD-34126	2.96852262249	Mus musculus	An Animal Model of Myc-driven medulloblastoma	FactorValue..CELL.SOURCE.	patched tumors	progenitor-derived tumors
E-GEOD-20667_35_2_3_mod.txt	ArrayExpress	E-GEOD-20667	-5.63174288587	Homo sapiens	The Notch/Hes1 pathway sustains NF-B activation through CYLD repression in T cell leukemia	FactorValue..CELL.LINE.	ACC525 [DND41]	JCRB0033 [CEM]
E-GEOD-11238_25_1_2_mod.txt	ArrayExpress	E-GEOD-11238	-2.07179206648	Homo sapiens	Transcription profiling by array of HeLa cells infected with vaccinia virus mutant for E3L	Factor.Value.time.	2	6
E-GEOD-26830_37_1_2_mod.txt	ArrayExpress	E-GEOD-26830	-2.29037861405	Mus musculus	Dual functions of Tet1 in transcriptional regulation in mouse embryonic stem cells (mRNA)	FactorValue..OVEREXPRESSION.	Nanog	none
GDS2819_individual_19_26_mod.txt	GEO	GDS2819	1.66255467002	Homo sapiens	Leukemic white blood cells and various RNA preparation protocols	individual	patient 26	patient 8
E-GEOD-22798_36_1_2_mod.txt	ArrayExpress	E-GEOD-22798	8.91135804074	Mus musculus	Expression data from Pax7+ satellite cell derived tumors in vitro and in vivo	FactorValue..SAMPLE.TYPE.	normal muscle as control for myogenic tumors	tumors derived from CSM4B cells transformed in vitro
E-GEOD-14519_33_2_4_mod.txt	ArrayExpress	E-GEOD-14519	-1.92252010049	Homo sapiens	Transcription profiling by array of human multiple myeloma cell lines after treatment with arsenic	Factor.Value.cell.line.	KMS11	U266
GDS3113_tissue_4_26_mod.txt	GEO	GDS3113	1.7745204774	Homo sapiens	Various normal tissues	tissue	colon	testis
E-GEOD-35416_38_4_5_mod.txt	ArrayExpress	E-GEOD-35416	-1.21958479462	Mus musculus	Transcriptional profiling of mouse inner cell mass of the blastocyst	FactorValue..SOURCE.AGE.	E13.5	E3.5
GDS3142_tissue_4_6_mod.txt	GEO	GDS3142	1.13846573205	Mus musculus	Various tissues	tissue	brain	embryonic stem cells
GDS2819_individual_5_19_mod.txt	GEO	GDS2819	-2.46192901926	Homo sapiens	Leukemic white blood cells and various RNA preparation protocols	individual	patient 13	patient 26
E-GEOD-24547_44_2_5_mod.txt	ArrayExpress	E-GEOD-24547	1.66966471624	Homo sapiens	Transcriptional pathway signatures for the Aurora inhibitor Danusertib	FactorValue..CELL.LINE.	COLO205	MDA-MB-468
E-GEOD-27316_38_1_2_mod.txt	ArrayExpress	E-GEOD-27316	1.54970160742	Homo sapiens	Effects of long dsRNA expression in HeLa and HEK293 cells	FactorValue..CELL.TYPE.	HEK293 cells	HeLa cells
E-MEXP-563_32_5_6_mod.txt	ArrayExpress	E-MEXP-563	-2.98570352031	Homo sapiens	Transcription profiling of human mesenchymal stem cells transformed with lentiviral vectors of TERT, E6, SV40 and RAS	Factor.Value..transfect.	hTERT/HPVE6/HPVE7/SV40t/hRas	wild_type
GDS1249_time_2_3_mod.txt	GEO	GDS1249	2.34109005384	Homo sapiens	Toll-like receptor agonists synergistic effect on dendritic cells: time course	time	2 h	8 h
E-GEOD-18811_24_6_7_mod.txt	ArrayExpress	E-GEOD-18811	1.6190722711	Homo sapiens	Transcriptome Analysis and Molecular Signature of Human Retinal Pigment Epithelium	Factor.Value..CELL.TYPE.	native fetal RPE	not specified
E-GEOD-24705_38_2_7_mod.txt	ArrayExpress	E-GEOD-24705	-1.35833968552	Mus musculus	mRNA expression data from iPSCs	FactorValue..CELL.LINE.	iPS cell line iPSM1_6	ntES cells cell line NTM2_4
E-GEOD-11990_35_1_2_mod.txt	ArrayExpress	E-GEOD-11990	-4.11606339142	Mus musculus	Gene expression profiling of mouse p53-deficient epidermal carcinoma defines molecular determinants of human cancer malignancy (training dataset)	FactorValue..HISTOLOGICAL.SUBTYPE.	mixed	not specified
E-GEOD-9894_31_3_4_mod.txt	ArrayExpress	E-GEOD-9894	3.00314766181	Homo sapiens	Transcription profiling of human culture-amplified and native bone marrow mesenchymal stem cells to characterize specific plasma membrane protein phenotype	Factor.Value.cell.type.	hematopoietic	mesenchymal stem cell
E-GEOD-14034_70_1_2_mod.txt	ArrayExpress	E-GEOD-14034	2.88789012938	Homo sapiens	Alterations in Gene Expression in Human Mesothelial Cells Correlate with Mineral Pathogenicity	FactorValue..CELL.TYPE.	mesothelial	ovarian epithelial
E-GEOD-21515_27_1_2_mod.txt	ArrayExpress	E-GEOD-21515	1.43935253153	Mus musculus	Expression data from mouse ES and iPS cells	Factor.Value..CELL.LINE.	ESC2	IP14D-1
GDS2819_individual_18_19_mod.txt	GEO	GDS2819	-1.97142708869	Homo sapiens	Leukemic white blood cells and various RNA preparation protocols	individual	patient 25	patient 26
GDS1490_tissue_1_25_mod.txt	GEO	GDS1490	1.08050657172	Mus musculus	Neural tissue profiling	tissue	adrenal	pons
GDS988_cell.line_1_3_mod.txt	GEO	GDS988	-7.13539616055	Homo sapiens	Kaposi's sarcoma-associated herpesvirus LANA overexpression in B lymphoid cells: time course	cell.line	293	Jurkat
GDS3113_tissue_11_30_mod.txt	GEO	GDS3113	1.09725942244	Homo sapiens	Various normal tissues	tissue	liver	trachea
E-GEOD-23938_38_6_9_mod.txt	ArrayExpress	E-GEOD-23938	2.02693200086	Mus musculus	Comprehensive genomic profiling identified miRNA signatures associated with mammary tumor differentiation and development	FactorValue..GENETICALLY.ENGINEERED.MOUSE.MODEL.	MMTV-PymT	p53-/-
E-GEOD-22973_39_1_2_mod.txt	ArrayExpress	E-GEOD-22973	-6.3754065214	Homo sapiens	An Invasive Gene Expression Signature in Pancreas Cancer.	FactorValue..CELL.LINE.	AsPC-1	BxPC-3
E-GEOD-24207_47_4_22_mod.txt	ArrayExpress	E-GEOD-24207	1.22276131674	Mus musculus	mRNA analysis in different mouse tissues	FactorValue..TISSUE.	brain	testis
GDS3113_tissue_3_31_mod.txt	GEO	GDS3113	2.85653079199	Homo sapiens	Various normal tissues	tissue	brain	Universal Human Reference RNA
GDS3113_tissue_1_31_mod.txt	GEO	GDS3113	1.53485955982	Homo sapiens	Various normal tissues	tissue	adrenal gland	Universal Human Reference RNA
GDS3113_tissue_16_26_mod.txt	GEO	GDS3113	1.34970057294	Homo sapiens	Various normal tissues	tissue	peripheral blood lymphocyte	testis
GDS1265_development.stage_3_5_mod.txt	GEO	GDS1265	-2.55343081915	Mus musculus	Oocyte development (MOE430A)	development.stage	primordial follicle	small antral follicle
E-GEOD-24207_47_4_8_mod.txt	ArrayExpress	E-GEOD-24207	4.34788157154	Mus musculus	mRNA analysis in different mouse tissues	FactorValue..TISSUE.	brain	insulinoma
E-TABM-1091_29_3_6_mod.txt	ArrayExpress	E-TABM-1091	1.98096975205	Homo sapiens	Transcriptiion profiling by array of human ratiometric mixes of high quality RNA from different tissues using different labeling protocols to provide a mechanism for assessing process improvement	Factor.Value..MIX.	Mix1	Universal Human Reference RNA
GDS1381_individual_3_4_mod.txt	GEO	GDS1381	-3.37796773487	Homo sapiens	Carboplatin sensitive and resistant ovarian carcinoma	individual	patient 3	patient 4
E-GEOD-26966_28_1_2_mod.txt	ArrayExpress	E-GEOD-26966	-2.58457327968	Homo sapiens	Transcription profiling by array of human gonadotrope and null cell pituitary tumors	FactorValue.disease.state.	normal	pituitary cancer
GDS2819_disease.state_6_9_mod.txt	GEO	GDS2819	-3.86192124269	Homo sapiens	Leukemic white blood cells and various RNA preparation protocols	disease.state	c-ALL, Pre-B-ALL without t 9,22	T-ALL
E-GEOD-34126_42_2_4_mod.txt	ArrayExpress	E-GEOD-34126	-2.96852262249	Mus musculus	An Animal Model of Myc-driven medulloblastoma	FactorValue..CELL.TYPE.	Myc/DNp53-infected Prom1+ cells	not specified
GDS2819_individual_14_20_mod.txt	GEO	GDS2819	4.36125097224	Homo sapiens	Leukemic white blood cells and various RNA preparation protocols	individual	patient 21	patient 27
GDS3113_tissue_27_31_mod.txt	GEO	GDS3113	2.68043181792	Homo sapiens	Various normal tissues	tissue	thymus	Universal Human Reference RNA
E-GEOD-27987_35_1_6_mod.txt	ArrayExpress	E-GEOD-27987	1.31073656306	Mus musculus	Differential pre-mRNA processing in Crebbp+/- mice	FactorValue..CELL.TYPE.	Cdkn1a-/- FLHSC	Crebbp+/+ MEF
E-GEOD-18680_37_1_3_mod.txt	ArrayExpress	E-GEOD-18680	3.56582887048	Homo sapiens	Gene expression profile of human ovarian cancer cell lines in vitro	FactorValue..CELL.LINE.	parental IGROV	parental T112D
E-GEOD-24207_47_5_14_mod.txt	ArrayExpress	E-GEOD-24207	1.39364307264	Mus musculus	mRNA analysis in different mouse tissues	FactorValue..TISSUE.	diaphragm	pancreatic acini
E-GEOD-22334_37_1_2_mod.txt	ArrayExpress	E-GEOD-22334	6.92857487926	Homo sapiens	Induction of apoptotic processes in Capan-1 pancreatic carcinoma cells by restoration of p16INK4a expression	FactorValue..P16.RESTORATION.	no	yes
E-GEOD-24207_47_4_19_mod.txt	ArrayExpress	E-GEOD-24207	1.01351515286	Mus musculus	mRNA analysis in different mouse tissues	FactorValue..TISSUE.	brain	seminal vesicle
GDS2819_individual_19_21_mod.txt	GEO	GDS2819	-2.38358112445	Homo sapiens	Leukemic white blood cells and various RNA preparation protocols	individual	patient 26	patient 3
GDS3113_tissue_1_19_mod.txt	GEO	GDS3113	-2.98795476451	Homo sapiens	Various normal tissues	tissue	adrenal gland	retina
GDS2819_individual_2_17_mod.txt	GEO	GDS2819	4.36431412346	Homo sapiens	Leukemic white blood cells and various RNA preparation protocols	individual	patient 10	patient 24
GDS181_tissue_13_26_mod.txt	GEO	GDS181	-3.29880143259	Homo sapiens	Large-scale analysis of the human transcriptome (HG-U95A)	tissue	HL60	prostate cancer
E-GEOD-19639_26_2_4_mod.txt	ArrayExpress	E-GEOD-19639	3.01618494637	Homo sapiens	Transcription profiling by array of human estrogen receptor positive breast cancer cell lines after long-term estrogen deprivation	Factor.Value..cell.line.	MCF-7	ZR75-1
GDS2819_individual_2_19_mod.txt	GEO	GDS2819	3.75990224725	Homo sapiens	Leukemic white blood cells and various RNA preparation protocols	individual	patient 10	patient 26
E-GEOD-35364_38_3_4_mod.txt	ArrayExpress	E-GEOD-35364	2.2873595992	Homo sapiens	Cancer-associated fibroblast transfected with miR-155, anti-miR-31 and anti-miR-214	FactorValue..TIME.	7d	not specified
GDS3113_tissue_4_29_mod.txt	GEO	GDS3113	1.7844387462	Homo sapiens	Various normal tissues	tissue	colon	tonsil
E-GEOD-33199_29_7_10_mod.txt	ArrayExpress	E-GEOD-33199	1.30332137913	Mus musculus	A mouse model of the most aggressive subgroup of human medulloblastoma [Mouse430 2]	FactorValue..VARIATION.	p53-/-, Cdkn2c-/-, Math1-GFP FACS sort for GFP+	Ptc+/-, Cdkn2c-/-
GDS3113_tissue_5_27_mod.txt	GEO	GDS3113	2.2630679366	Homo sapiens	Various normal tissues	tissue	fetal brain	thymus
GDS1381_individual_1_3_mod.txt	GEO	GDS1381	2.50046187914	Homo sapiens	Carboplatin sensitive and resistant ovarian carcinoma	individual	patient 1	patient 3
E-GEOD-16615_46_2_5_mod.txt	ArrayExpress	E-GEOD-16615	-1.53909813773	Homo sapiens	gene expression in human subcutaneous adipose tissue after CLA intervention	FactorValue..SUBJECT.	2	5
GDS756_disease.state_1_2_mod.txt	GEO	GDS756	-1.36014137195	Homo sapiens	Colon cancer progression	disease.state	metastasic tumor	primary tumor
E-GEOD-21515_27_1_3_mod.txt	ArrayExpress	E-GEOD-21515	1.11155736848	Mus musculus	Expression data from mouse ES and iPS cells	Factor.Value..CELL.LINE.	ESC2	IP14D-101
GDS2819_individual_20_23_mod.txt	GEO	GDS2819	-1.15078244506	Homo sapiens	Leukemic white blood cells and various RNA preparation protocols	individual	patient 27	patient 5
E-GEOD-26408_38_3_4_mod.txt	ArrayExpress	E-GEOD-26408	2.96800244224	Mus musculus	Signatures of murine B-cell development implicate Yy1 as a regulator of the germinal center-specific program	FactorValue..STRAIN.OR.LINE.	Bcl6 transgenic (Catoretti et al., Cancer Cell 2005	Lig4/P53 KO (Frank et al., Mol. Cell 2000;5:993-1002)
GDS1956_disease.state_2_8_mod.txt	GEO	GDS1956	1.50547137559	Homo sapiens	Various muscle diseases (HG-U133A)	disease.state	amyotophic lateral sclerosis	fascioscapulohumeral muscular dystrophy
E-MEXP-563_32_1_5_mod.txt	ArrayExpress	E-MEXP-563	1.77165312893	Homo sapiens	Transcription profiling of human mesenchymal stem cells transformed with lentiviral vectors of TERT, E6, SV40 and RAS	Factor.Value..transfect.	hTERT	hTERT/HPVE6/HPVE7/SV40t/hRas
E-TABM-672_24_8_9_mod.txt	ArrayExpress	E-TABM-672	1.16720862876	Mus musculus	Transcription profiling of mouse embyronic stem cell line CGR8 during the first 10 days of differentiation into embryoid bodies	Factor.Value..Age.	7	10
E-GEOD-24207_47_12_14_mod.txt	ArrayExpress	E-GEOD-24207	1.19285093492	Mus musculus	mRNA analysis in different mouse tissues	FactorValue..TISSUE.	muscle	pancreatic acini
GDS2819_individual_20_24_mod.txt	GEO	GDS2819	-1.5411748026	Homo sapiens	Leukemic white blood cells and various RNA preparation protocols	individual	patient 27	patient 6
GDS2819_individual_2_4_mod.txt	GEO	GDS2819	5.629841827	Homo sapiens	Leukemic white blood cells and various RNA preparation protocols	individual	patient 10	patient 12
E-GEOD-35044_38_1_2_mod.txt	ArrayExpress	E-GEOD-35044	2.28621303465	Mus musculus	Expression profiles of Telomerase+ vs. ALT+ G3 Atm-/-TERT-ER T-cell lymphomas	FactorValue..TELOMERE.MAINTANENCE.MECHANISM.	alternative lengthening of telomeres (ALT)	Telomerase
E-GEOD-29832_34_1_3_mod.txt	ArrayExpress	E-GEOD-29832	-1.47880218425	Homo sapiens	Expression data from pure/mixed blood and breast to test feasability of deconvolution of clinical samples	FactorValue..TISSUE.	33% blood and 67% breast	blood
GDS3113_tissue_13_20_mod.txt	GEO	GDS3113	-1.8418863511	Homo sapiens	Various normal tissues	tissue	mammary gland	salivary gland
E-GEOD-18534_32_1_3_mod.txt	ArrayExpress	E-GEOD-18534	-5.7399090294	Mus musculus	Transcription profiling by array of a mouse small cell lung cancer model	Factor.Value..GENOTYPE.	Rb -/-; p53 -/-	wild type
GDS3113_tissue_23_29_mod.txt	GEO	GDS3113	1.3487427435	Homo sapiens	Various normal tissues	tissue	small intestine	tonsil
GDS3113_tissue_22_27_mod.txt	GEO	GDS3113	1.50565940439	Homo sapiens	Various normal tissues	tissue	skin	thymus
GDS3113_tissue_8_29_mod.txt	GEO	GDS3113	2.1271895446	Homo sapiens	Various normal tissues	tissue	fetal thymus	tonsil
E-GEOD-33145_31_2_3_mod.txt	ArrayExpress	E-GEOD-33145	-3.20648412557	Homo sapiens	Expression data from DKAT and other breast cancer cell lines under baseline growth conditions	FactorValue..CELL.LINE.	Human breast cancer-derived cell line HMEC	Human breast cancer-derived cell line MDA-MB-231
E-GEOD-24705_38_2_9_mod.txt	ArrayExpress	E-GEOD-24705	-2.6035853132	Mus musculus	mRNA expression data from iPSCs	FactorValue..CELL.LINE.	iPS cell line iPSM1_6	ntiPS cell line ntiPSM1_8_3
E-GEOD-27546_38_4_5_mod.txt	ArrayExpress	E-GEOD-27546	1.02578548146	Mus musculus	Effects of HMGN variants on cellular transcription profile	FactorValue..GENOTYPE.VARIATION.	HMGN1 WT	HMGN1_N2swap
E-GEOD-33199_29_7_9_mod.txt	ArrayExpress	E-GEOD-33199	3.37764859351	Mus musculus	A mouse model of the most aggressive subgroup of human medulloblastoma [Mouse430 2]	FactorValue..VARIATION.	p53-/-, Cdkn2c-/-, Math1-GFP FACS sort for GFP+	p53floxed, Nestin-Cre, Cdkn2c-/-
GDS2819_individual_2_25_mod.txt	GEO	GDS2819	6.70421318886	Homo sapiens	Leukemic white blood cells and various RNA preparation protocols	individual	patient 10	patient 7
E-GEOD-24705_38_3_6_mod.txt	ArrayExpress	E-GEOD-24705	-1.71738862774	Mus musculus	mRNA expression data from iPSCs	FactorValue..CELL.LINE.	iPS cell line iPSM1_8	ntES cells cell line NTM1_7
E-GEOD-30056_36_1_2_mod.txt	ArrayExpress	E-GEOD-30056	-3.28775699107	Mus musculus	Reconstitution of the mouse germ-cell specification pathway in culture by pluripotent stem cells	FactorValue..AMPLIFICATION.	--	22-cycle PCR from 5ng total RNA (equivalent to 500 cells)
GDS3113_tissue_18_26_mod.txt	GEO	GDS3113	2.16981754733	Homo sapiens	Various normal tissues	tissue	prostate	testis
GDS3113_tissue_13_21_mod.txt	GEO	GDS3113	-1.62262416912	Homo sapiens	Various normal tissues	tissue	mammary gland	skeletal muscle
E-GEOD-24705_38_1_8_mod.txt	ArrayExpress	E-GEOD-24705	-1.65947183046	Mus musculus	mRNA expression data from iPSCs	FactorValue..CELL.LINE.	ES cells cell line E14	ntiPS cell line ntiPSM1_6_5
E-GEOD-16238_34_1_2_mod.txt	ArrayExpress	E-GEOD-16238	7.34704119258	Homo sapiens	Genome-wide identification of binding sites of Evi1 in human myeloid cell lines	Factor.Value..CELL.LINE.	HTB-58	TF-1
E-GEOD-22381_39_2_3_mod.txt	ArrayExpress	E-GEOD-22381	-6.94748441897	Mus musculus	Identification of downstream transcriptional targets of Dlx5 during early mouse inner ear (otocyst/otic vesicle) development	FactorValue..GENOTYPE.VARIATION.	N/A	Wild-type
E-GEOD-27414_37_1_2_mod.txt	ArrayExpress	E-GEOD-27414	1.31843809316	Homo sapiens	Human umbilical cord blood-derived mesenchymal stem cells from 2 donors	FactorValue..GENDER.	female	male
E-GEOD-21664_34_1_2_mod.txt	ArrayExpress	E-GEOD-21664	-1.74135596159	Mus musculus	Transcription profiling by array of interleukin-7-dependent and BCR-ABL1-transformed Mus musculus pre-B cells	FactorValue.GENOTYPE.	BCR-ABL1-transformation	none
GDS3113_tissue_19_27_mod.txt	GEO	GDS3113	1.84238250641	Homo sapiens	Various normal tissues	tissue	retina	thymus
E-GEOD-27987_35_2_6_mod.txt	ArrayExpress	E-GEOD-27987	1.38426110587	Mus musculus	Differential pre-mRNA processing in Crebbp+/- mice	FactorValue..CELL.TYPE.	Cdkn1a+/+ FLHSC	Crebbp+/+ MEF
GDS2958_cell.line_2_3_mod.txt	GEO	GDS2958	-2.81897461366	Homo sapiens	Tumor suppressor PTEN depletion effect on various cell lines	cell.line	HCC827	SKBR-3
GDS2819_disease.state_5_9_mod.txt	GEO	GDS2819	-2.544119625	Homo sapiens	Leukemic white blood cells and various RNA preparation protocols	disease.state	AML with t 11q23, MLL	T-ALL
GDS3113_tissue_7_27_mod.txt	GEO	GDS3113	3.03794520279	Homo sapiens	Various normal tissues	tissue	fetal liver	thymus
E-GEOD-33199_29_7_8_mod.txt	ArrayExpress	E-GEOD-33199	3.27001940635	Mus musculus	A mouse model of the most aggressive subgroup of human medulloblastoma [Mouse430 2]	FactorValue..VARIATION.	p53-/-, Cdkn2c-/-, Math1-GFP FACS sort for GFP+	p53-/-, Cdkn2c-/-, Math1-GFP infected with mcMyc/mRFP
E-GEOD-23938_38_8_9_mod.txt	ArrayExpress	E-GEOD-23938	1.88030733025	Mus musculus	Comprehensive genomic profiling identified miRNA signatures associated with mammary tumor differentiation and development	FactorValue..GENETICALLY.ENGINEERED.MOUSE.MODEL.	not specified	p53-/-
E-GEOD-34126_42_1_2_mod.txt	ArrayExpress	E-GEOD-34126	5.56727866508	Mus musculus	An Animal Model of Myc-driven medulloblastoma	FactorValue..CELL.TYPE.	FACS-sorted Prominin1+, Lineage-negative (Lin) cells	Myc/DNp53-infected Prom1+ cells
E-GEOD-34126_41_2_4_mod.txt	ArrayExpress	E-GEOD-34126	2.79973315937	Mus musculus	An Animal Model of Myc-driven medulloblastoma	FactorValue..CELL.SOURCE.	patched tumors	stem cell-derived tumors
E-GEOD-24705_38_1_4_mod.txt	ArrayExpress	E-GEOD-24705	1.07368447127	Mus musculus	mRNA expression data from iPSCs	FactorValue..CELL.LINE.	ES cells cell line E14	iPS cell line iPSM2_3
E-GEOD-34775_44_2_3_mod.txt	ArrayExpress	E-GEOD-34775	2.63372231479	Mus musculus	Identification of genes characteristic of primary inguinal or epididymal preadipocyte fibroblasts	FactorValue..CELL.TYPE.	proliferating Epididymal Fat Zfp423-GFP+ fibroblasts	proliferating Inguinal FAT GFP- fibroblasts
GDS2177_age_1_2_mod.txt	GEO	GDS2177	1.96541633804	Mus musculus	Type 1 diabetes model: autoimmune target organs (MG-U74A)	age	15 wk	6 wk
GDS3113_tissue_4_31_mod.txt	GEO	GDS3113	3.79185238605	Homo sapiens	Various normal tissues	tissue	colon	Universal Human Reference RNA
GDS3113_tissue_3_8_mod.txt	GEO	GDS3113	-1.27807239246	Homo sapiens	Various normal tissues	tissue	brain	fetal thymus
E-GEOD-34126_43_1_2_mod.txt	ArrayExpress	E-GEOD-34126	-2.96852262249	Mus musculus	An Animal Model of Myc-driven medulloblastoma	FactorValue..GENOTYPE.VARIATION.	not specified	Ptch1 mutant
E-GEOD-37316_40_2_3_mod.txt	ArrayExpress	E-GEOD-37316	-4.05111893396	Mus musculus	Gene expression data from postnatal day 7 subventricular zone (SVZ)	FactorValue..VARIATION.	Ptch het p53 het	Ptch het p53 wt
E-GEOD-12198_26_1_4_mod.txt	ArrayExpress	E-GEOD-12198	-2.44210028605	Homo sapiens	Transcription profiling by array of human natural killer cells	FactorValue.TREATMENT.	high dose IL2	none
GDS1962_tissue_1_2_mod.txt	GEO	GDS1962	1.07852135247	Homo sapiens	Glioma-derived stem cell factor effect on angiogenesis in the brain	tissue	not applicable	tumor grade II
GDS3113_tissue_13_22_mod.txt	GEO	GDS3113	-2.38940079083	Homo sapiens	Various normal tissues	tissue	mammary gland	skin
E-GEOD-22381_39_1_2_mod.txt	ArrayExpress	E-GEOD-22381	6.90370234185	Mus musculus	Identification of downstream transcriptional targets of Dlx5 during early mouse inner ear (otocyst/otic vesicle) development	FactorValue..GENOTYPE.VARIATION.	Dlx5-null	N/A
GDS2819_individual_2_8_mod.txt	GEO	GDS2819	4.99828046873	Homo sapiens	Leukemic white blood cells and various RNA preparation protocols	individual	patient 10	patient 16
E-GEOD-18552_59_1_2_mod.txt	ArrayExpress	E-GEOD-18552	3.19042857055	Homo sapiens	CDK inhibitors and flavopiridol profiling on A2780 and MCF7 cells	FactorValue..CELL.TYPE.	adenocarcinoma mammary cells	adenocarcinoma ovary
GDS3113_tissue_7_24_mod.txt	GEO	GDS3113	2.53816663524	Homo sapiens	Various normal tissues	tissue	fetal liver	spinal cord
E-GEOD-33892_51_1_3_mod.txt	ArrayExpress	E-GEOD-33892	1.47419370836	Homo sapiens	Comparison of TEX and M9-ENL1 cell lines to HL60 and THP1 cell lines	FactorValue..LEUKEMIA.TYPE.	AML	pre B-ALL
GDS3113_tissue_5_21_mod.txt	GEO	GDS3113	1.52418515391	Homo sapiens	Various normal tissues	tissue	fetal brain	skeletal muscle
GDS3113_tissue_12_31_mod.txt	GEO	GDS3113	2.99075160251	Homo sapiens	Various normal tissues	tissue	lung	Universal Human Reference RNA
E-GEOD-24207_47_6_8_mod.txt	ArrayExpress	E-GEOD-24207	4.19881586982	Mus musculus	mRNA analysis in different mouse tissues	FactorValue..TISSUE.	eye	insulinoma
GDS3113_tissue_8_17_mod.txt	GEO	GDS3113	1.68627532886	Homo sapiens	Various normal tissues	tissue	fetal thymus	placenta
E-GEOD-33167_31_1_3_mod.txt	ArrayExpress	E-GEOD-33167	-7.01025440263	Homo sapiens	Phenotypic Plasticity in Aggressive Triple-Negative Breast Cancer: Human Biology is Recapitulated by a Novel Model System	FactorValue..CELL.LINE.	Human breast cancer-derived cell line DKAT	Human breast cancer-derived cell line MDA-MB-231
GDS639_age_3_5_mod.txt	GEO	GDS639	2.54777807148	Mus musculus	Dystrophin-deficient mdx hindlimb muscle development time course	age	23 day	56 day
E-GEOD-21447_43_7_8_mod.txt	ArrayExpress	E-GEOD-21447	3.36695372435	Mus musculus	A global expression switch marks pachytene initiation during mouse male meiosis	FactorValue..MEIOTIC.FRACTION.	round spermatids	spermatogonia
E-GEOD-24207_47_14_23_mod.txt	ArrayExpress	E-GEOD-24207	-1.17396933941	Mus musculus	mRNA analysis in different mouse tissues	FactorValue..TISSUE.	pancreatic acini	thymus
GDS3113_tissue_13_19_mod.txt	GEO	GDS3113	-2.72612389285	Homo sapiens	Various normal tissues	tissue	mammary gland	retina
GDS1490_tissue_12_24_mod.txt	GEO	GDS1490	1.05059325784	Mus musculus	Neural tissue profiling	tissue	hippocampus CA1	pituitary
GDS3113_tissue_4_13_mod.txt	GEO	GDS3113	1.99516195457	Homo sapiens	Various normal tissues	tissue	colon	mammary gland
E-GEOD-34126_43_3_4_mod.txt	ArrayExpress	E-GEOD-34126	-5.39848920197	Mus musculus	An Animal Model of Myc-driven medulloblastoma	FactorValue..GENOTYPE.VARIATION.	tumor-bearing mice	wild type
E-GEOD-19639_26_1_2_mod.txt	ArrayExpress	E-GEOD-19639	-3.75411408992	Homo sapiens	Transcription profiling by array of human estrogen receptor positive breast cancer cell lines after long-term estrogen deprivation	Factor.Value..cell.line.	HCC-1428	MCF-7
E-MEXP-2700_29_1_2_mod.txt	ArrayExpress	E-MEXP-2700	-1.03318839187	Homo sapiens	Investigating gradients of gene expression involved in early human cortical development	Factor.Value.DEVELOPMENTAL_STAGE.	embryo	fetus
E-GEOD-25155_28_1_2_mod.txt	ArrayExpress	E-GEOD-25155	4.88750317049	Homo sapiens	Transcription profiling by array of human kidney and gastrointestinal epithelial cells after treatment with Helicobacter pylori lipopolysaccharide	Factor.Value.cell.line.	AGS	HEK-TLR2
GDS3113_tissue_2_13_mod.txt	GEO	GDS3113	1.49206093735	Homo sapiens	Various normal tissues	tissue	bone marrow	mammary gland
GDS3113_tissue_12_28_mod.txt	GEO	GDS3113	-2.73937547084	Homo sapiens	Various normal tissues	tissue	lung	thyroid
GDS3113_tissue_1_18_mod.txt	GEO	GDS3113	-2.65228989616	Homo sapiens	Various normal tissues	tissue	adrenal gland	prostate
E-GEOD-35416_38_1_4_mod.txt	ArrayExpress	E-GEOD-35416	1.11974932731	Mus musculus	Transcriptional profiling of mouse inner cell mass of the blastocyst	FactorValue..SOURCE.AGE.	8-week	E13.5
E-GEOD-24207_47_8_14_mod.txt	ArrayExpress	E-GEOD-24207	-2.70018561149	Mus musculus	mRNA analysis in different mouse tissues	FactorValue..TISSUE.	insulinoma	pancreatic acini
E-GEOD-35416_38_2_4_mod.txt	ArrayExpress	E-GEOD-35416	1.25165946834	Mus musculus	Transcriptional profiling of mouse inner cell mass of the blastocyst	FactorValue..SOURCE.AGE.	E11.5	E13.5
GDS3113_tissue_8_31_mod.txt	GEO	GDS3113	4.13460318445	Homo sapiens	Various normal tissues	tissue	fetal thymus	Universal Human Reference RNA
E-GEOD-24207_47_9_14_mod.txt	ArrayExpress	E-GEOD-24207	1.42110602677	Mus musculus	mRNA analysis in different mouse tissues	FactorValue..TISSUE.	kidney	pancreatic acini
E-GEOD-12773_33_1_2_mod.txt	ArrayExpress	E-GEOD-12773	-1.55866554973	Homo sapiens	Transcription profiling of human airway epithelial cell-conditioned monocyte-derive dendritic cells	Factor.Value.growth.condition.	co culture with airway epithelial cells	control
E-MEXP-1482_37_1_2_mod.txt	ArrayExpress	E-MEXP-1482	-3.85511663981	Homo sapiens	Transcription profiling of human chronic lymphocytic leukemia samples and pRS-15/16 transfected MEG01 cell lines to identify MiR-15a and miR-16-1 cluster function in human leukemia	Factor.Value..disease.state.		chronic lymphocytic leukemia
E-GEOD-20089_24_1_3_mod.txt	ArrayExpress	E-GEOD-20089	-5.83063089989	Homo sapiens	Pseudopod Experiment	Factor.Value..CELL.LINE.	DU145	MDA231
E-GEOD-35478_43_3_6_mod.txt	ArrayExpress	E-GEOD-35478	3.10836985898	Homo sapiens	Characterization of colon cancer cells: a functional approach characterizing CD133 as a potential stem cell marker	FactorValue..AGE.	50	70
E-GEOD-29437_46_2_3_mod.txt	ArrayExpress	E-GEOD-29437	-3.48507779974	Homo sapiens	Progesterone inhibits epithelial-to-mesenchymal transition in endometrial cancer	FactorValue..PROGRESSIVE.STATUS.	not specified	progressive (recurrence or metastasis)
E-MEXP-3216_30_1_2_mod.txt	ArrayExpress	E-MEXP-3216	-1.90898283012	Mus musculus	Transcription profiling by array of mouse wild type and p16ink4a deficient bone marrow cells differentiated with normal LCM-supplemented differentiation medium or supplemented with Interleukin 4 during differeniation	Factor.Value.COMPOUND.	IL-4	none
E-GEOD-16779_23_1_2_mod.txt	ArrayExpress	E-GEOD-16779	5.69484343392	Mus musculus	Undifferentiated Pleomorphic Sarcoma Model	Factor.Value..TISSUE.	Normal Skeletal Muscle	Soft Tissue Sarcoma
E-GEOD-20089_24_4_5_mod.txt	ArrayExpress	E-GEOD-20089	-4.46126275399	Homo sapiens	Pseudopod Experiment	Factor.Value..CELL.LINE.	MDA435	U251
E-GEOD-20033_27_1_3_mod.txt	ArrayExpress	E-GEOD-20033	-1.80192780334	Homo sapiens	Minicircle-derived iPS cells - Affymetrix Data	Factor.Value..CELL.TYPE.	adipose stem cells derived from adult human donor	Human Embryonic Stem Cells
E-GEOD-34907_29_1_4_mod.txt	ArrayExpress	E-GEOD-34907	-3.03891751042	Mus musculus	Genetic and epigenetic determinants of neurogenesis and myogenesis [expression profiling]	FactorValue..CELL.TYPE.	Neuronally differentiated MEF cells	undifferentiated P19 cells
GDS3113_tissue_24_31_mod.txt	GEO	GDS3113	3.18021038546	Homo sapiens	Various normal tissues	tissue	spinal cord	Universal Human Reference RNA
E-GEOD-29437_46_1_2_mod.txt	ArrayExpress	E-GEOD-29437	4.3978833943	Homo sapiens	Progesterone inhibits epithelial-to-mesenchymal transition in endometrial cancer	FactorValue..PROGRESSIVE.STATUS.	non-progressive (no recurrence or metastasis)	not specified
GDS3113_tissue_11_26_mod.txt	GEO	GDS3113	1.89111052786	Homo sapiens	Various normal tissues	tissue	liver	testis
GDS2819_disease.state_5_6_mod.txt	GEO	GDS2819	1.3178016177	Homo sapiens	Leukemic white blood cells and various RNA preparation protocols	disease.state	AML with t 11q23, MLL	c-ALL, Pre-B-ALL without t 9,22
E-GEOD-24705_39_2_4_mod.txt	ArrayExpress	E-GEOD-24705	-2.43234292632	Mus musculus	mRNA expression data from iPSCs	FactorValue..CELL.TYPE.	induced pluripotent stem cells	nuclear transfer ES cells from induced pluripotent stem cells
GDS2819_individual_11_20_mod.txt	GEO	GDS2819	2.45840072334	Homo sapiens	Leukemic white blood cells and various RNA preparation protocols	individual	patient 19	patient 27
E-GEOD-24207_47_1_8_mod.txt	ArrayExpress	E-GEOD-24207	4.09467480227	Mus musculus	mRNA analysis in different mouse tissues	FactorValue..TISSUE.	adipose tissue	insulinoma
E-GEOD-24705_38_4_9_mod.txt	ArrayExpress	E-GEOD-24705	-2.64578298209	Mus musculus	mRNA expression data from iPSCs	FactorValue..CELL.LINE.	iPS cell line iPSM2_3	ntiPS cell line ntiPSM1_8_3
E-GEOD-24368_38_1_3_mod.txt	ArrayExpress	E-GEOD-24368	1.14323486015	Mus musculus	Distinct Early Molecular Responses to Mutations Causing vLINCL and JNCL Presage ATP Synthase Subunit c Accumulation in Cerebellar Cells	FactorValue..GENOTYPE.	Cln3 +/+	Cln6 +/+
GDS3113_tissue_17_31_mod.txt	GEO	GDS3113	2.44832785559	Homo sapiens	Various normal tissues	tissue	placenta	Universal Human Reference RNA
GDS2958_cell.type_1_3_mod.txt	GEO	GDS2958	9.82043296775	Homo sapiens	Tumor suppressor PTEN depletion effect on various cell lines	cell.type	epidermoid carcinoma	non-small cell lung carcinoma
GDS3113_tissue_5_29_mod.txt	GEO	GDS3113	2.93608611467	Homo sapiens	Various normal tissues	tissue	fetal brain	tonsil
E-GEOD-20667_35_2_5_mod.txt	ArrayExpress	E-GEOD-20667	-2.10665832411	Homo sapiens	The Notch/Hes1 pathway sustains NF-B activation through CYLD repression in T cell leukemia	FactorValue..CELL.LINE.	ACC525 [DND41]	KOPT-K
E-GEOD-33167_31_2_3_mod.txt	ArrayExpress	E-GEOD-33167	-3.45806486193	Homo sapiens	Phenotypic Plasticity in Aggressive Triple-Negative Breast Cancer: Human Biology is Recapitulated by a Novel Model System	FactorValue..CELL.LINE.	Human breast cancer-derived cell line HMEC	Human breast cancer-derived cell line MDA-MB-231
E-GEOD-25488_40_3_5_mod.txt	ArrayExpress	E-GEOD-25488	2.62161894382	Mus musculus	Expression data from C3(1)Tag mammary tumors	FactorValue..GENOTYPE.	Her2/Neu	p53 KO ER neg
GDS3113_tissue_13_24_mod.txt	GEO	GDS3113	-1.38351995399	Homo sapiens	Various normal tissues	tissue	mammary gland	spinal cord
E-GEOD-19864_28_2_3_mod.txt	ArrayExpress	E-GEOD-19864	-1.00884194144	Homo sapiens	Transcription profiling by array of human IMR90 cells with RNAi-mediated suppression of RB, p107 or p130	Factor.Value.growth.condition.	low serum quiescence	normal growth
E-GEOD-35416_34_4_5_mod.txt	ArrayExpress	E-GEOD-35416	1.51318529817	Mus musculus	Transcriptional profiling of mouse inner cell mass of the blastocyst	FactorValue..CELL.TYPE.	ICMs dissected by immunosurgery	MEFs passage 2 cultured in Serum
E-GEOD-24207_47_8_9_mod.txt	ArrayExpress	E-GEOD-24207	-4.12129163826	Mus musculus	mRNA analysis in different mouse tissues	FactorValue..TISSUE.	insulinoma	kidney
E-GEOD-24207_47_14_21_mod.txt	ArrayExpress	E-GEOD-24207	-1.42654842895	Mus musculus	mRNA analysis in different mouse tissues	FactorValue..TISSUE.	pancreatic acini	spleen
E-GEOD-22798_35_1_2_mod.txt	ArrayExpress	E-GEOD-22798	8.74049889338	Mus musculus	Expression data from Pax7+ satellite cell derived tumors in vitro and in vivo	FactorValue..GENOTYPE.	littermate control	Pax7CE/+;LSL-KrasG12D/+;Trp53Fl/+
GDS1381_individual_3_5_mod.txt	GEO	GDS1381	-3.05804926525	Homo sapiens	Carboplatin sensitive and resistant ovarian carcinoma	individual	patient 3	patient 5
GDS2819_individual_14_18_mod.txt	GEO	GDS2819	4.64739840664	Homo sapiens	Leukemic white blood cells and various RNA preparation protocols	individual	patient 21	patient 25
GDS988_cell.line_1_2_mod.txt	GEO	GDS988	-2.02326418971	Homo sapiens	Kaposi's sarcoma-associated herpesvirus LANA overexpression in B lymphoid cells: time course	cell.line	293	BJAB
GDS917_tissue_1_2_mod.txt	GEO	GDS917	1.4947664492	Homo sapiens	Whole blood RNA isolation and leukocyte RNA purification: comparison of methods	tissue	leukocyte	whole blood
GDS2736_disease.state_7_9_mod.txt	GEO	GDS2736	-2.04901521123	Homo sapiens	Malignant fibrous histiocytoma and various soft tissue sarcomas	disease.state	myxofibrosarcoma	synovial sarcoma
E-MEXP-1482_34_1_3_mod.txt	ArrayExpress	E-MEXP-1482	3.97682220965	Homo sapiens	Transcription profiling of human chronic lymphocytic leukemia samples and pRS-15/16 transfected MEG01 cell lines to identify MiR-15a and miR-16-1 cluster function in human leukemia	Factor.Value..genotype.		miR15a/miR16-1
GDS3113_tissue_24_26_mod.txt	GEO	GDS3113	1.16287847682	Homo sapiens	Various normal tissues	tissue	spinal cord	testis
E-GEOD-27220_37_1_2_mod.txt	ArrayExpress	E-GEOD-27220	-1.523902715	Homo sapiens	Transcriptional effects of 1,25 dihydroxi-vitamin D3 physiological and supra-physiological concentrations in breast cancer organotypic culture	FactorValue..AGE.	56	70
E-GEOD-32903_31_1_3_mod.txt	ArrayExpress	E-GEOD-32903	-1.31260060731	Mus musculus	Smad4 and Trim33 dependend nodal/activin responsive genes in differentiated mouse ESCs	FactorValue..VARIATION.	Smad4-null	WT
E-GEOD-30220_36_1_2_mod.txt	ArrayExpress	E-GEOD-30220	2.95328727541	Homo sapiens	Global gene-expression profiles analysis of iPSCs	FactorValue..DERIVATION.	a Chinese female blastocyst	beta-thalassemia patient
E-GEOD-33199_29_9_10_mod.txt	ArrayExpress	E-GEOD-33199	-2.07432721438	Mus musculus	A mouse model of the most aggressive subgroup of human medulloblastoma [Mouse430 2]	FactorValue..VARIATION.	p53floxed, Nestin-Cre, Cdkn2c-/-	Ptc+/-, Cdkn2c-/-
E-GEOD-37316_36_1_3_mod.txt	ArrayExpress	E-GEOD-37316	-3.05577234714	Mus musculus	Gene expression data from postnatal day 7 subventricular zone (SVZ)	FactorValue..CELL.TYPE.	cancer stem cells (CSCs)	not specified
E-GEOD-37316_36_2_3_mod.txt	ArrayExpress	E-GEOD-37316	-2.78312808978	Mus musculus	Gene expression data from postnatal day 7 subventricular zone (SVZ)	FactorValue..CELL.TYPE.	neural stem cells (NSCs)	not specified
E-TABM-1091_32_3_5_mod.txt	ArrayExpress	E-TABM-1091	-2.50880139492	Homo sapiens	Transcriptiion profiling by array of human ratiometric mixes of high quality RNA from different tissues using different labeling protocols to provide a mechanism for assessing process improvement	Factor.Value..BATCH.	Batch3	Batch5
GDS3113_tissue_5_12_mod.txt	GEO	GDS3113	1.952748152	Homo sapiens	Various normal tissues	tissue	fetal brain	lung
E-TABM-672_24_1_9_mod.txt	ArrayExpress	E-TABM-672	1.12713464091	Mus musculus	Transcription profiling of mouse embyronic stem cell line CGR8 during the first 10 days of differentiation into embryoid bodies	Factor.Value..Age.	0	10
E-GEOD-22798_37_1_2_mod.txt	ArrayExpress	E-GEOD-22798	8.92636700789	Mus musculus	Expression data from Pax7+ satellite cell derived tumors in vitro and in vivo	FactorValue..TISSUE.	Muscle	Tumor
GDS3113_tissue_5_9_mod.txt	GEO	GDS3113	1.45919816436	Homo sapiens	Various normal tissues	tissue	fetal brain	heart
E-GEOD-24705_38_2_6_mod.txt	ArrayExpress	E-GEOD-24705	-1.63869286342	Mus musculus	mRNA expression data from iPSCs	FactorValue..CELL.LINE.	iPS cell line iPSM1_6	ntES cells cell line NTM1_7
E-GEOD-23938_38_2_8_mod.txt	ArrayExpress	E-GEOD-23938	-2.93147824282	Mus musculus	Comprehensive genomic profiling identified miRNA signatures associated with mammary tumor differentiation and development	FactorValue..GENETICALLY.ENGINEERED.MOUSE.MODEL.	C3TAg	not specified
E-GEOD-26290_49_1_3_mod.txt	ArrayExpress	E-GEOD-26290	1.78297208551	Mus musculus	Expression data from control and Phospholipid dependent kinase 1 (PDK1) null cytotoxic T-lymphocytes (CTL) and from control and Akt inhibitor treated CTL	FactorValue..GENOTYPE.VARIATION.	control	wild type
GDS2362_disease.state_2_3_mod.txt	GEO	GDS2362	1.44908378409	Homo sapiens	Presymptomatic and symptomatic malaria: peripheral blood mononuclear cells	disease.state	symptomatic, naturally acquired	uninfected
E-GEOD-21299_35_1_4_mod.txt	ArrayExpress	E-GEOD-21299	3.35327903246	Mus musculus	Expression data from murine cell line transduced with epitope tagged forms of Hoxa9	FactorValue..TIME.POINT.	day 0	day 5
E-GEOD-24244_39_1_2_mod.txt	ArrayExpress	E-GEOD-24244	4.08161471001	Homo sapiens	Gene expression profiling of four subpopulations in GBM	FactorValue..AGE.	41 y	43 y
E-GEOD-24705_38_2_11_mod.txt	ArrayExpress	E-GEOD-24705	-2.54768023922	Mus musculus	mRNA expression data from iPSCs	FactorValue..CELL.LINE.	iPS cell line iPSM1_6	ntiPS cell line ntiPSM2_4_3
GDS3113_tissue_12_13_mod.txt	GEO	GDS3113	1.19406117104	Homo sapiens	Various normal tissues	tissue	lung	mammary gland
GDS3142_tissue_6_13_mod.txt	GEO	GDS3142	-1.00303720143	Mus musculus	Various tissues	tissue	embryonic stem cells	muscle
E-GEOD-34126_42_3_4_mod.txt	ArrayExpress	E-GEOD-34126	-2.79973315937	Mus musculus	An Animal Model of Myc-driven medulloblastoma	FactorValue..CELL.TYPE.	Myc/DNp53-infected Prom1+Lin- cells	not specified
E-GEOD-25155_28_2_3_mod.txt	ArrayExpress	E-GEOD-25155	-5.00740118066	Homo sapiens	Transcription profiling by array of human kidney and gastrointestinal epithelial cells after treatment with Helicobacter pylori lipopolysaccharide	Factor.Value.cell.line.	HEK-TLR2	MKN45
GDS3113_tissue_5_25_mod.txt	GEO	GDS3113	2.31284159904	Homo sapiens	Various normal tissues	tissue	fetal brain	spleen
GDS3113_tissue_26_28_mod.txt	GEO	GDS3113	-3.71279516471	Homo sapiens	Various normal tissues	tissue	testis	thyroid
GDS3592_disease.state_1_2_mod.txt	GEO	GDS3592	4.87824849298	Homo sapiens	Ovarian normal surface epithelia and ovarian cancer epithelial cells	disease.state	normal	ovarian adenocarcinoma
E-GEOD-34208_40_1_2_mod.txt	ArrayExpress	E-GEOD-34208	-6.38831691922	Mus musculus	Expression data of mouse ENCCs and mouse embryonic Gut E14.5	FactorValue..CELL.TYPE.	enteric neural crest cells	enteric neural crest cells from embryonic gut
E-MEXP-563_32_1_3_mod.txt	ArrayExpress	E-MEXP-563	2.10853658123	Homo sapiens	Transcription profiling of human mesenchymal stem cells transformed with lentiviral vectors of TERT, E6, SV40 and RAS	Factor.Value..transfect.	hTERT	hTERT/HPVE6/HPVE7
E-GEOD-27838_38_1_2_mod.txt	ArrayExpress	E-GEOD-27838	-1.84187953114	Homo sapiens	Gene expression of expanded and non-expanded natural killer cells from healthy donor and myeloma patients	FactorValue..NKC.STATE.	expanded	non-expanded
E-GEOD-16249_46_1_2_mod.txt	ArrayExpress	E-GEOD-16249	-3.00613455026	Homo sapiens	siRNA-mediated knockdown of MITF and PAX3 in metastatic melanoma cell lines	FactorValue..TUMOUR.SITE.	neck nodule	small intestine
GDS3113_tissue_27_28_mod.txt	GEO	GDS3113	-3.04969525544	Homo sapiens	Various normal tissues	tissue	thymus	thyroid
E-GEOD-36149_28_1_2_mod.txt	ArrayExpress	E-GEOD-36149	5.82791227382	Homo sapiens	Gene expression data from obatoclax-treated SEM-K2 and RS4:11 cell lines	FactorValue..CELL.LINE.	Acute Lymphoblastic Leukemia cell line RS4:11	Acute Lymphoblastic Leukemia cell line SEM-K2
E-GEOD-26290_49_2_3_mod.txt	ArrayExpress	E-GEOD-26290	1.84625912033	Mus musculus	Expression data from control and Phospholipid dependent kinase 1 (PDK1) null cytotoxic T-lymphocytes (CTL) and from control and Akt inhibitor treated CTL	FactorValue..GENOTYPE.VARIATION.	PDK1 null	wild type
GDS3113_tissue_22_26_mod.txt	GEO	GDS3113	2.16875931366	Homo sapiens	Various normal tissues	tissue	skin	testis
E-MEXP-563_32_3_6_mod.txt	ArrayExpress	E-MEXP-563	-3.3225869726	Homo sapiens	Transcription profiling of human mesenchymal stem cells transformed with lentiviral vectors of TERT, E6, SV40 and RAS	Factor.Value..transfect.	hTERT/HPVE6/HPVE7	wild_type
GDS1256_time_1_2_mod.txt	GEO	GDS1256	1.53098513388	Homo sapiens	IFN-gamma inflammatory effect on bronchial epithelial cells modulated by dexamethasone: time course	time	24 h	8 h
E-GEOD-14519_33_2_3_mod.txt	ArrayExpress	E-GEOD-14519	-4.50685574209	Homo sapiens	Transcription profiling by array of human multiple myeloma cell lines after treatment with arsenic	Factor.Value.cell.line.	KMS11	MM.1s
GDS3113_tissue_13_16_mod.txt	GEO	GDS3113	-1.57034205011	Homo sapiens	Various normal tissues	tissue	mammary gland	peripheral blood lymphocyte
E-TABM-1091_29_5_6_mod.txt	ArrayExpress	E-TABM-1091	3.0002331288	Homo sapiens	Transcriptiion profiling by array of human ratiometric mixes of high quality RNA from different tissues using different labeling protocols to provide a mechanism for assessing process improvement	Factor.Value..MIX.	skeletal muscle only	Universal Human Reference RNA
E-GEOD-19018_24_1_2_mod.txt	ArrayExpress	E-GEOD-19018	-1.42022539214	Homo sapiens	Changes in gene expression of Imr90 cells with age and senescence under 3% and 20% oxygen growth conditions	Factor.Value..OXYGEN.GROWTH.CONDITIONS.	20%	3%
E-GEOD-23583_51_3_5_mod.txt	ArrayExpress	E-GEOD-23583	1.50865713254	Homo sapiens	Highly efficient reprogramming to pluripotency and directed differentiation using synthetic mRNA	FactorValue..REPROGRAMMING.PROTOCOL.	RNA derived iPS	viral derived iPS
E-GEOD-31447_35_1_2_mod.txt	ArrayExpress	E-GEOD-31447	-1.15021729075	Homo sapiens	Effect of endoplasmic reticulum stress on gene expression in lymphoblastoid cell lines.	FactorValue..TIME.	24hrs	3hrs
GDS2545_tissue_1_2_mod.txt	GEO	GDS2545	-1.74993182974	Homo sapiens	Metastatic prostate cancer (HG-U95A)	tissue	metastatic prostate tumor	normal prostate adjacent to tumor
E-GEOD-34775_44_2_4_mod.txt	ArrayExpress	E-GEOD-34775	2.54075321082	Mus musculus	Identification of genes characteristic of primary inguinal or epididymal preadipocyte fibroblasts	FactorValue..CELL.TYPE.	proliferating Epididymal Fat Zfp423-GFP+ fibroblasts	proliferating Inguinal FAT Zfp423-GFP+ fibroblasts
GDS3113_tissue_25_31_mod.txt	GEO	GDS3113	2.63065815547	Homo sapiens	Various normal tissues	tissue	spleen	Universal Human Reference RNA
GDS1439_disease.state_2_3_mod.txt	GEO	GDS1439	-3.07784372677	Homo sapiens	Prostate cancer progression	disease.state	metastatic	primary
E-GEOD-22600_33_1_2_mod.txt	ArrayExpress	E-GEOD-22600	-5.57176159609	Homo sapiens	Tissue Specific Pathways for Estrogen Regulation of Ovarian Cancer Growth and Metastasis	FactorValue..CELL.TYPE.	2008 (ER-) ovarian cancer cells	PEO4 (ER+) ovarian cancer cells
E-MEXP-1273_30_1_2_mod.txt	ArrayExpress	E-MEXP-1273	1.83784764144	Homo sapiens	Transcription profiling of human mesenchymal stem cells from adipose tissue grown in normal media in monolayer or with LVG or RGD alignate	Factor.Value..growth.condition.	freshly isolated	LVG alginate culture
GDS2819_individual_2_9_mod.txt	GEO	GDS2819	4.5113212514	Homo sapiens	Leukemic white blood cells and various RNA preparation protocols	individual	patient 10	patient 17
E-GEOD-24207_47_13_22_mod.txt	ArrayExpress	E-GEOD-24207	1.23703837924	Mus musculus	mRNA analysis in different mouse tissues	FactorValue..TISSUE.	ovary	testis
GDS3142_tissue_6_15_mod.txt	GEO	GDS3142	-1.01442171515	Mus musculus	Various tissues	tissue	embryonic stem cells	pituitary gland
GDS3113_tissue_9_13_mod.txt	GEO	GDS3113	1.68761115868	Homo sapiens	Various normal tissues	tissue	heart	mammary gland
E-GEOD-24705_38_4_6_mod.txt	ArrayExpress	E-GEOD-24705	-1.68089053232	Mus musculus	mRNA expression data from iPSCs	FactorValue..CELL.LINE.	iPS cell line iPSM2_3	ntES cells cell line NTM1_7
GDS3113_tissue_18_31_mod.txt	GEO	GDS3113	4.18714945598	Homo sapiens	Various normal tissues	tissue	prostate	Universal Human Reference RNA
E-GEOD-27987_35_4_5_mod.txt	ArrayExpress	E-GEOD-27987	-1.40282746543	Mus musculus	Differential pre-mRNA processing in Crebbp+/- mice	FactorValue..CELL.TYPE.	Crebbp+/- MEF	Crebbp+/+ FLHSC
GDS3113_tissue_3_5_mod.txt	GEO	GDS3113	-2.08696896253	Homo sapiens	Various normal tissues	tissue	brain	fetal brain
E-GEOD-24705_38_3_10_mod.txt	ArrayExpress	E-GEOD-24705	-2.74051943304	Mus musculus	mRNA expression data from iPSCs	FactorValue..CELL.LINE.	iPS cell line iPSM1_8	ntiPS cell line ntiPSM2_3_3
E-GEOD-20033_27_1_4_mod.txt	ArrayExpress	E-GEOD-20033	-2.0723348692	Homo sapiens	Minicircle-derived iPS cells - Affymetrix Data	Factor.Value..CELL.TYPE.	adipose stem cells derived from adult human donor	iPSC derived from hASC using lentiviral reprogramming vector
GDS1439_disease.state_1_2_mod.txt	GEO	GDS1439	3.7816352681	Homo sapiens	Prostate cancer progression	disease.state	benign	metastatic
E-GEOD-30220_36_2_4_mod.txt	ArrayExpress	E-GEOD-30220	-2.84056283457	Homo sapiens	Global gene-expression profiles analysis of iPSCs	FactorValue..DERIVATION.	beta-thalassemia patient	beta-thalassemia patient iPS cells
E-GEOD-24628_23_2_3_mod.txt	ArrayExpress	E-GEOD-24628	-1.03776278846	Mus musculus	Subtypes of medulloblastoma have distinct developmental origins	Factor.Value..GENOTYPE.VARIATION.	Ptch1(+/-)	wildtype
E-GEOD-24705_38_5_9_mod.txt	ArrayExpress	E-GEOD-24705	-1.7080157313	Mus musculus	mRNA expression data from iPSCs	FactorValue..CELL.LINE.	iPS cell line iPSM2_4	ntiPS cell line ntiPSM1_8_3
E-GEOD-14034_68_1_2_mod.txt	ArrayExpress	E-GEOD-14034	-2.88789012938	Homo sapiens	Alterations in Gene Expression in Human Mesothelial Cells Correlate with Mineral Pathogenicity	FactorValue..BIOSOURCEPROVIDER.	An SV40 Tag-immortalized, anchorage-dependent human ovarian epithelial cell line (IOSE 398) was a kind gift from Dr. Nelly Auersperg (Canadian Ovarian Tissue Bank, BC).	Human mesothelial LP9/TERT-1 (LP9) cells, an hTERT-immortalized cell line phenotypically and functionally resembling normal human mesothelial cells were obtained from Dr. James Rheinwald (Dana Farber Cancer Research Institute, Boston MA).
GDS3113_tissue_20_31_mod.txt	GEO	GDS3113	3.63857678258	Homo sapiens	Various normal tissues	tissue	salivary gland	Universal Human Reference RNA
E-GEOD-20033_24_1_2_mod.txt	ArrayExpress	E-GEOD-20033	-2.02225166291	Homo sapiens	Minicircle-derived iPS cells - Affymetrix Data	Factor.Value..DEVELOPMENTAL.STAGE.	adult	undifferentiated
E-GEOD-14897_25_1_4_mod.txt	ArrayExpress	E-GEOD-14897	-1.83331281515	Homo sapiens	Transcription profiling by array of human hepatic cells derived from foreskin fibroblast cells or embryonic stem cells	FactorValue.cell.type.	fibroblast	stem cell
E-GEOD-33455_31_1_2_mod.txt	ArrayExpress	E-GEOD-33455	-2.21066050686	Homo sapiens	Expression data from docetaxel-resistant prostate cancer cell lines	FactorValue..CELL.LINE.	DU-145	PC3
E-GEOD-16238_33_1_2_mod.txt	ArrayExpress	E-GEOD-16238	-7.34704119258	Homo sapiens	Genome-wide identification of binding sites of Evi1 in human myeloid cell lines	Factor.Value..AGE.	35 years	65 years
E-GEOD-9894_31_1_4_mod.txt	ArrayExpress	E-GEOD-9894	3.05966718767	Homo sapiens	Transcription profiling of human culture-amplified and native bone marrow mesenchymal stem cells to characterize specific plasma membrane protein phenotype	Factor.Value.cell.type.	erythropoietic	mesenchymal stem cell
E-TABM-426_57_1_2_mod.txt	ArrayExpress	E-TABM-426	1.20641272228	Mus musculus	Transcription profiling of testis from wild type mice and mice with a Sertoli-specific ablation of Dicer	Factor.Value..Age.	0	5
E-GEOD-18552_58_1_2_mod.txt	ArrayExpress	E-GEOD-18552	-3.19042857055	Homo sapiens	CDK inhibitors and flavopiridol profiling on A2780 and MCF7 cells	FactorValue..CELL.LINE.	A2780	MCF7
GDS2819_individual_20_27_mod.txt	GEO	GDS2819	-1.93520647215	Homo sapiens	Leukemic white blood cells and various RNA preparation protocols	individual	patient 27	patient 9
GDS2428_specimen_1_2_mod.txt	GEO	GDS2428	5.11757969944	Homo sapiens	DNA demethylation effect on glioblastoma cultures	specimen	GLI56	GLI60
GDS812_development.stage_4_5_mod.txt	GEO	GDS812	1.91949305818	Mus musculus	Preimplantation embryo development (MG-U74A)	development.stage	blastocyst	oocyte
E-GEOD-19639_26_1_3_mod.txt	ArrayExpress	E-GEOD-19639	-1.39294184611	Homo sapiens	Transcription profiling by array of human estrogen receptor positive breast cancer cell lines after long-term estrogen deprivation	Factor.Value..cell.line.	HCC-1428	MDA-361
E-GEOD-21902_34_1_2_mod.txt	ArrayExpress	E-GEOD-21902	1.1097228191	Mus musculus	Expression Data from chemical induced tumors obtained from NDR1+/+	Factor.Value..DISEASE.STATUS.	normal	tumor
E-GEOD-21927_39_1_5_mod.txt	ArrayExpress	E-GEOD-21927	1.00044021483	Mus musculus	Transcription profiling by array of Mus musculus myeloid-derived supressor cells from bone marrow or tumor infiltrate	FactorValue.DISEASE_STATE.	4T1 tumor-bearing	MCA203 tumor-bearing
E-GEOD-29437_47_2_3_mod.txt	ArrayExpress	E-GEOD-29437	-4.04464847401	Homo sapiens	Progesterone inhibits epithelial-to-mesenchymal transition in endometrial cancer	FactorValue..TREAMENT.	none	not specified
GDS1381_individual_3_6_mod.txt	GEO	GDS1381	-3.27391505415	Homo sapiens	Carboplatin sensitive and resistant ovarian carcinoma	individual	patient 3	patient 6
E-GEOD-11990_35_2_3_mod.txt	ArrayExpress	E-GEOD-11990	3.45602785589	Mus musculus	Gene expression profiling of mouse p53-deficient epidermal carcinoma defines molecular determinants of human cancer malignancy (training dataset)	FactorValue..HISTOLOGICAL.SUBTYPE.	not specified	poorly differentiated
E-GEOD-18269_53_1_3_mod.txt	ArrayExpress	E-GEOD-18269	-3.02969912361	Homo sapiens	HepaRG cells as a model of the primary human hepatocyte transcriptome	FactorValue..CELL.LINE.	HepaRG	not specified
E-GEOD-20677_31_1_2_mod.txt	ArrayExpress	E-GEOD-20677	-5.01889010389	Homo sapiens	Transcription profiling by array of human peripheral blood mononuclear cells and embryonic kidney cells treated with gold nanoparticle oligonucleotide complex	Factor.Value..CELL.TYPE.	Embryonic Kidney cell	PBMCs
GDS917_protocol_1_2_mod.txt	GEO	GDS917	1.4947664492	Homo sapiens	Whole blood RNA isolation and leukocyte RNA purification: comparison of methods	protocol	buffy coat	PAXgene
GDS1956_disease.state_4_10_mod.txt	GEO	GDS1956	-1.367839966	Homo sapiens	Various muscle diseases (HG-U133A)	disease.state	Calpain 3 mutation	juvenile dermatomyositis
GDS2819_disease.state_2_3_mod.txt	GEO	GDS2819	1.46836204228	Homo sapiens	Leukemic white blood cells and various RNA preparation protocols	disease.state	ALL with t 1, 19	ALL with t 12, 21
E-MEXP-563_32_1_6_mod.txt	ArrayExpress	E-MEXP-563	-1.21405039138	Homo sapiens	Transcription profiling of human mesenchymal stem cells transformed with lentiviral vectors of TERT, E6, SV40 and RAS	Factor.Value..transfect.	hTERT	wild_type
E-GEOD-31545_41_1_2_mod.txt	ArrayExpress	E-GEOD-31545	-5.06557442745	Homo sapiens	Stem-like glioma-propagating cells contribute to molecular heterogeneity and survival outcome in oligodendroglial tumors	FactorValue..HISTOLOGY.	anaplastic oligoastrocytoma	glioblastoma multiforme
E-GEOD-18269_53_1_2_mod.txt	ArrayExpress	E-GEOD-18269	-2.99030729083	Homo sapiens	HepaRG cells as a model of the primary human hepatocyte transcriptome	FactorValue..CELL.LINE.	HepaRG	HepG2
E-GEOD-23938_38_2_4_mod.txt	ArrayExpress	E-GEOD-23938	-3.34837294273	Mus musculus	Comprehensive genomic profiling identified miRNA signatures associated with mammary tumor differentiation and development	FactorValue..GENETICALLY.ENGINEERED.MOUSE.MODEL.	C3TAg	MMTV-H2N
E-GEOD-24705_38_1_3_mod.txt	ArrayExpress	E-GEOD-24705	1.11018256668	Mus musculus	mRNA expression data from iPSCs	FactorValue..CELL.LINE.	ES cells cell line E14	iPS cell line iPSM1_8
GDS2819_individual_2_5_mod.txt	GEO	GDS2819	6.22183126651	Homo sapiens	Leukemic white blood cells and various RNA preparation protocols	individual	patient 10	patient 13
GDS2958_cell.type_2_3_mod.txt	GEO	GDS2958	2.81897461366	Homo sapiens	Tumor suppressor PTEN depletion effect on various cell lines	cell.type	mammary adenocarcinoma	non-small cell lung carcinoma
E-GEOD-19401_37_1_4_mod.txt	ArrayExpress	E-GEOD-19401	2.91856232654	Mus musculus	Transcription profiling by array of Mus musculus follicular dendritic cells	FactorValue.CELL.TYPE.	ex vivo pLN follicular dendritic cell	in vitro pLN follicular dendritic cell
E-GEOD-24547_44_3_4_mod.txt	ArrayExpress	E-GEOD-24547	-3.39174392022	Homo sapiens	Transcriptional pathway signatures for the Aurora inhibitor Danusertib	FactorValue..CELL.LINE.	HCT-116	MCF7
E-GEOD-27987_35_2_4_mod.txt	ArrayExpress	E-GEOD-27987	1.55071326866	Mus musculus	Differential pre-mRNA processing in Crebbp+/- mice	FactorValue..CELL.TYPE.	Cdkn1a+/+ FLHSC	Crebbp+/- MEF
E-GEOD-24207_47_8_12_mod.txt	ArrayExpress	E-GEOD-24207	-3.89303654641	Mus musculus	mRNA analysis in different mouse tissues	FactorValue..TISSUE.	insulinoma	muscle
GDS2177_tissue_2_3_mod.txt	GEO	GDS2177	-1.3354500144	Mus musculus	Type 1 diabetes model: autoimmune target organs (MG-U74A)	tissue	pancreas	submandibular gland
E-GEOD-24207_47_6_22_mod.txt	ArrayExpress	E-GEOD-24207	1.07369561501	Mus musculus	mRNA analysis in different mouse tissues	FactorValue..TISSUE.	eye	testis
GDS3113_tissue_24_29_mod.txt	GEO	GDS3113	1.17279674562	Homo sapiens	Various normal tissues	tissue	spinal cord	tonsil
E-GEOD-30127_31_1_2_mod.txt	ArrayExpress	E-GEOD-30127	-1.02751847301	Homo sapiens	Establishment of human trophoblast progenitor cell lines from the chorion	FactorValue..CELL.LINE.CELL.TYPE.	CTB primary cells	hESC H7 cell line
GDS1490_tissue_24_34_mod.txt	GEO	GDS1490	-1.99622272404	Mus musculus	Neural tissue profiling	tissue	pituitary	white adipose tissue
E-GEOD-26290_48_2_3_mod.txt	ArrayExpress	E-GEOD-26290	-1.90469938951	Mus musculus	Expression data from control and Phospholipid dependent kinase 1 (PDK1) null cytotoxic T-lymphocytes (CTL) and from control and Akt inhibitor treated CTL	FactorValue..AGENT.	control	not specified
E-GEOD-30220_36_2_3_mod.txt	ArrayExpress	E-GEOD-30220	-3.00166973728	Homo sapiens	Global gene-expression profiles analysis of iPSCs	FactorValue..DERIVATION.	beta-thalassemia patient	beta-thalassemia patient fibroblast cells
GDS3113_tissue_13_31_mod.txt	GEO	GDS3113	1.79669043148	Homo sapiens	Various normal tissues	tissue	mammary gland	Universal Human Reference RNA
E-GEOD-20051_39_1_3_mod.txt	ArrayExpress	E-GEOD-20051	2.18259288902	Homo sapiens	Expression profiling of BRAFV600E melanoma cell lines upon RAF inhibition	FactorValue..CELL.LINE.	Malme3M	SkMel-19
E-GEOD-20987_29_1_2_mod.txt	ArrayExpress	E-GEOD-20987	-2.97585847891	Mus musculus	Gene expression data of BCR-ABL1 transformed B cell precursors from BCL6 wild-type and BCL6 knockout mice	Factor.Value..CELL.TYPE.	Bcl6 -/- BCR-ABL1-transformed B cell precursors	Bcl6 +/+ BCR-ABL1-transformed B cell precursors
E-GEOD-24244_41_1_2_mod.txt	ArrayExpress	E-GEOD-24244	4.08161471001	Homo sapiens	Gene expression profiling of four subpopulations in GBM	FactorValue..GENDER.	female	male
E-GEOD-21761_68_2_3_mod.txt	ArrayExpress	E-GEOD-21761	3.57444924209	Mus musculus	A large intergenic non-coding RNA induced by p53 mediates global gene repression in the p53 transcriptional response	FactorValue..TRANSFECTION.	AdenoGFP (control)	not specified
E-GEOD-34907_29_3_4_mod.txt	ArrayExpress	E-GEOD-34907	-3.90994571436	Mus musculus	Genetic and epigenetic determinants of neurogenesis and myogenesis [expression profiling]	FactorValue..CELL.TYPE.	undifferentiated MEF cells	undifferentiated P19 cells
GDS3113_tissue_3_19_mod.txt	GEO	GDS3113	-1.66628353234	Homo sapiens	Various normal tissues	tissue	brain	retina
GDS2177_tissue_1_3_mod.txt	GEO	GDS2177	1.13904442773	Mus musculus	Type 1 diabetes model: autoimmune target organs (MG-U74A)	tissue	lacrimal gland	submandibular gland
GDS2819_individual_6_19_mod.txt	GEO	GDS2819	-1.94981131337	Homo sapiens	Leukemic white blood cells and various RNA preparation protocols	individual	patient 14	patient 26
GDS1518_agent_2_3_mod.txt	GEO	GDS1518	-1.33327302202	Rattus norvegicus	Ureteric bud epithelia response to non-branching and branching growth promoting factors	agent	heregulin	pleiotrophin
E-GEOD-20033_27_1_5_mod.txt	ArrayExpress	E-GEOD-20033	-1.5262540584	Homo sapiens	Minicircle-derived iPS cells - Affymetrix Data	Factor.Value..CELL.TYPE.	adipose stem cells derived from adult human donor	iPSC derived from hASC using minicircle reprogramming vector
GDS3113_tissue_5_16_mod.txt	GEO	GDS3113	1.57646727293	Homo sapiens	Various normal tissues	tissue	fetal brain	peripheral blood lymphocyte
E-GEOD-24207_47_5_8_mod.txt	ArrayExpress	E-GEOD-24207	4.09382868412	Mus musculus	mRNA analysis in different mouse tissues	FactorValue..TISSUE.	diaphragm	insulinoma
E-GEOD-24705_38_1_11_mod.txt	ArrayExpress	E-GEOD-24705	-1.51619343685	Mus musculus	mRNA expression data from iPSCs	FactorValue..CELL.LINE.	ES cells cell line E14	ntiPS cell line ntiPSM2_4_3
E-GEOD-23583_50_3_5_mod.txt	ArrayExpress	E-GEOD-23583	2.12469903584	Homo sapiens	Highly efficient reprogramming to pluripotency and directed differentiation using synthetic mRNA	FactorValue..CELL.TYPE.	iPS cells derived from BJ fibroblast	iPS cells derived from dH1CF fibroblast
E-GEOD-14990_25_1_2_mod.txt	ArrayExpress	E-GEOD-14990	-2.24517711496	Homo sapiens	MYC regulation of a poor prognosis metastatic cancer cell state	Factor.Value..CELL.TYPE.	cancer cell culture	immortalized cell culture
E-GEOD-25098_32_2_7_mod.txt	ArrayExpress	E-GEOD-25098	-8.41593941046	Mus musculus	Rhabdomyosarcoma can be initiated in activated Pax7+ Muscle Progenitor Cells	FactorValue..GENOTYPE.VARIATION.	Pax7-CreER/+; LSL-KrasG12D;Trp53Flox/+	Wild Type mice
E-GEOD-33199_29_3_7_mod.txt	ArrayExpress	E-GEOD-33199	-4.18909478867	Mus musculus	A mouse model of the most aggressive subgroup of human medulloblastoma [Mouse430 2]	FactorValue..VARIATION.	cmyc MB - GFP positive	p53-/-, Cdkn2c-/-, Math1-GFP FACS sort for GFP+
E-GEOD-37907_32_2_4_mod.txt	ArrayExpress	E-GEOD-37907	-2.63322524096	Mus musculus	Expression data from murine hematopoietic cells expressing BCR-ABL alone	FactorValue..ONCOGENES.	BCR-ABL+	NUP98-HOXA9+
E-GEOD-18534_29_1_2_mod.txt	ArrayExpress	E-GEOD-18534	5.7300634163	Mus musculus	Transcription profiling by array of a mouse small cell lung cancer model	Factor.Value..ORGANISM_PART.	lung	lung tumor
E-GEOD-23938_38_5_9_mod.txt	ArrayExpress	E-GEOD-23938	1.9863082655	Mus musculus	Comprehensive genomic profiling identified miRNA signatures associated with mammary tumor differentiation and development	FactorValue..GENETICALLY.ENGINEERED.MOUSE.MODEL.	MMTV-Hras	p53-/-
GDS3113_tissue_23_31_mod.txt	GEO	GDS3113	3.35615638335	Homo sapiens	Various normal tissues	tissue	small intestine	Universal Human Reference RNA
E-GEOD-24705_38_4_11_mod.txt	ArrayExpress	E-GEOD-24705	-2.58987790811	Mus musculus	mRNA expression data from iPSCs	FactorValue..CELL.LINE.	iPS cell line iPSM2_3	ntiPS cell line ntiPSM2_4_3
E-GEOD-24207_47_14_18_mod.txt	ArrayExpress	E-GEOD-24207	-1.01342842496	Mus musculus	mRNA analysis in different mouse tissues	FactorValue..TISSUE.	pancreatic acini	salivary gland
E-GEOD-27987_35_3_6_mod.txt	ArrayExpress	E-GEOD-27987	1.18353766349	Mus musculus	Differential pre-mRNA processing in Crebbp+/- mice	FactorValue..CELL.TYPE.	Crebbp+/- FLHSC	Crebbp+/+ MEF
GDS2819_individual_9_18_mod.txt	GEO	GDS2819	1.22000808453	Homo sapiens	Leukemic white blood cells and various RNA preparation protocols	individual	patient 17	patient 25
E-GEOD-24547_50_1_2_mod.txt	ArrayExpress	E-GEOD-24547	-2.53586795896	Homo sapiens	Transcriptional pathway signatures for the Aurora inhibitor Danusertib	FactorValue..TP53.STATUS.	mut	WT
E-GEOD-24705_38_6_8_mod.txt	ArrayExpress	E-GEOD-24705	-1.05226576941	Mus musculus	mRNA expression data from iPSCs	FactorValue..CELL.LINE.	ntES cells cell line NTM1_7	ntiPS cell line ntiPSM1_6_5
GDS3113_tissue_22_31_mod.txt	GEO	GDS3113	4.18609122231	Homo sapiens	Various normal tissues	tissue	skin	Universal Human Reference RNA
E-GEOD-11238_25_1_3_mod.txt	ArrayExpress	E-GEOD-11238	-1.91521942506	Homo sapiens	Transcription profiling by array of HeLa cells infected with vaccinia virus mutant for E3L	Factor.Value.time.	2	9
E-GEOD-35364_36_2_5_mod.txt	ArrayExpress	E-GEOD-35364	1.9658934136	Homo sapiens	Cancer-associated fibroblast transfected with miR-155, anti-miR-31 and anti-miR-214	FactorValue..CELL.TYPE.	human cancer-associated fibroblast co-cultured with ovarian cancer cells, 7d	human normal omental fibroblast
E-GEOD-21664_33_3_4_mod.txt	ArrayExpress	E-GEOD-21664	-1.70137830976	Mus musculus	Transcription profiling by array of interleukin-7-dependent and BCR-ABL1-transformed Mus musculus pre-B cells	Factor.Value..TREATMENT.	STI571 in presence of IL-7	withdrawal of IL-7
E-GEOD-24628_22_1_3_mod.txt	ArrayExpress	E-GEOD-24628	1.03727135003	Mus musculus	Subtypes of medulloblastoma have distinct developmental origins	Factor.Value..CELL.TYPE.	embryonic dorsal brainstem	medulloblastoma generated by inactivating Ptch1
E-GEOD-14098_36_1_6_mod.txt	ArrayExpress	E-GEOD-14098	-1.15843568973	Homo sapiens	Gene expression profiles obtained from laser-microdissected human choroid plexus papilloma cells	FactorValue..AGE.OF.PATIENT.	0 years	not specified
E-MEXP-1976_23_1_2_mod.txt	ArrayExpress	E-MEXP-1976	-1.02398709333	Mus musculus	Transcription profiling of Mixl1 heterozygous or null mouse embryonic stem cells to identify downstream transcriptional targets during early development	Factor.Value..TIME.	2	2.8
GDS2819_disease.state_4_5_mod.txt	GEO	GDS2819	-1.58461442865	Homo sapiens	Leukemic white blood cells and various RNA preparation protocols	disease.state	AML with normal karyotype and other abnormalities	AML with t 11q23, MLL
E-GEOD-34126_38_1_3_mod.txt	ArrayExpress	E-GEOD-34126	-4.70450309384	Mus musculus	An Animal Model of Myc-driven medulloblastoma	FactorValue..AGE.	adult	Postnatal day 5-7
GDS3113_tissue_3_28_mod.txt	GEO	GDS3113	-2.87359628137	Homo sapiens	Various normal tissues	tissue	brain	thyroid
GDS3113_tissue_9_31_mod.txt	GEO	GDS3113	3.48430159015	Homo sapiens	Various normal tissues	tissue	heart	Universal Human Reference RNA
E-GEOD-27220_37_1_3_mod.txt	ArrayExpress	E-GEOD-27220	-1.37898882085	Homo sapiens	Transcriptional effects of 1,25 dihydroxi-vitamin D3 physiological and supra-physiological concentrations in breast cancer organotypic culture	FactorValue..AGE.	56	74
E-GEOD-25098_33_1_3_mod.txt	ArrayExpress	E-GEOD-25098	-8.08003782951	Mus musculus	Rhabdomyosarcoma can be initiated in activated Pax7+ Muscle Progenitor Cells	FactorValue..TISSUE.	Bulk Tumor	Normal Muscle
GDS2819_individual_2_6_mod.txt	GEO	GDS2819	5.70971356062	Homo sapiens	Leukemic white blood cells and various RNA preparation protocols	individual	patient 10	patient 14
GDS3113_tissue_28_29_mod.txt	GEO	GDS3113	3.72271343351	Homo sapiens	Various normal tissues	tissue	thyroid	tonsil
GDS3113_tissue_23_28_mod.txt	GEO	GDS3113	-2.37397069001	Homo sapiens	Various normal tissues	tissue	small intestine	thyroid
GDS3113_tissue_8_30_mod.txt	GEO	GDS3113	1.32342017038	Homo sapiens	Various normal tissues	tissue	fetal thymus	trachea
E-GEOD-19401_37_2_4_mod.txt	ArrayExpress	E-GEOD-19401	2.62264270861	Mus musculus	Transcription profiling by array of Mus musculus follicular dendritic cells	FactorValue.CELL.TYPE.	follicular dendritic cell	in vitro pLN follicular dendritic cell
E-GEOD-23583_50_1_4_mod.txt	ArrayExpress	E-GEOD-23583	-4.48313110989	Homo sapiens	Highly efficient reprogramming to pluripotency and directed differentiation using synthetic mRNA	FactorValue..CELL.TYPE.	BJ fibroblast	iPS cells derived from CF fibroblast
GDS2819_individual_1_2_mod.txt	GEO	GDS2819	-4.76822243547	Homo sapiens	Leukemic white blood cells and various RNA preparation protocols	individual	patient 1	patient 10
E-GEOD-29986_32_1_2_mod.txt	ArrayExpress	E-GEOD-29986	-1.05341699651	Homo sapiens	gene expression analyses of pediatric lymphoblastic lymphomas and leukemias	FactorValue..ORGANISM.PART.	bone marrow	nodal tumor
E-MEXP-2360_27_2_3_mod.txt	ArrayExpress	E-MEXP-2360	-1.60587511171	Homo sapiens	Transcription profiling of human memory B cells to plasma cells differentiation time course	Factor.Value.CELL_TYPE.	bone marrow plasma cells	memory B cells
E-GEOD-33145_31_1_3_mod.txt	ArrayExpress	E-GEOD-33145	-6.64242406863	Homo sapiens	Expression data from DKAT and other breast cancer cell lines under baseline growth conditions	FactorValue..CELL.LINE.	Human breast cancer-derived cell line DKAT	Human breast cancer-derived cell line MDA-MB-231
E-GEOD-11990_35_2_5_mod.txt	ArrayExpress	E-GEOD-11990	5.77255744619	Mus musculus	Gene expression profiling of mouse p53-deficient epidermal carcinoma defines molecular determinants of human cancer malignancy (training dataset)	FactorValue..HISTOLOGICAL.SUBTYPE.	not specified	undifferentiated
GDS3113_tissue_13_18_mod.txt	GEO	GDS3113	-2.39045902451	Homo sapiens	Various normal tissues	tissue	mammary gland	prostate
E-GEOD-34126_42_1_3_mod.txt	ArrayExpress	E-GEOD-34126	5.39848920197	Mus musculus	An Animal Model of Myc-driven medulloblastoma	FactorValue..CELL.TYPE.	FACS-sorted Prominin1+, Lineage-negative (Lin) cells	Myc/DNp53-infected Prom1+Lin- cells
GDS2250_disease.state_1_4_mod.txt	GEO	GDS2250	-1.12887520172	Homo sapiens	Basal-like breast cancer tumors	disease.state	basal-like cancer	normal
E-GEOD-29328_31_1_3_mod.txt	ArrayExpress	E-GEOD-29328	-3.53964165409	Mus musculus	Expression data from squamous cell carcinoma stem cells	FactorValue..CELL.TYPE.	cutaneous squamous cell carcinoma	skin epidermis
E-GEOD-24207_47_8_18_mod.txt	ArrayExpress	E-GEOD-24207	-3.71361403645	Mus musculus	mRNA analysis in different mouse tissues	FactorValue..TISSUE.	insulinoma	salivary gland
GDS3113_tissue_29_31_mod.txt	GEO	GDS3113	2.00741363984	Homo sapiens	Various normal tissues	tissue	tonsil	Universal Human Reference RNA
GDS3113_tissue_1_20_mod.txt	GEO	GDS3113	-2.10371722276	Homo sapiens	Various normal tissues	tissue	adrenal gland	salivary gland
E-GEOD-27987_35_3_4_mod.txt	ArrayExpress	E-GEOD-27987	1.34998982628	Mus musculus	Differential pre-mRNA processing in Crebbp+/- mice	FactorValue..CELL.TYPE.	Crebbp+/- FLHSC	Crebbp+/- MEF
E-GEOD-29848_38_1_3_mod.txt	ArrayExpress	E-GEOD-29848	-1.26257209837	Mus musculus	Microarray data of differentiating embryonic stem cells overexpressing the transcription factor Msgn1	FactorValue..TREATMENT.	Day2 EBs cultured for another 12h	Day2 EBs cultured for another 48h
E-GEOD-24705_38_1_2_mod.txt	ArrayExpress	E-GEOD-24705	1.03148680237	Mus musculus	mRNA expression data from iPSCs	FactorValue..CELL.LINE.	ES cells cell line E14	iPS cell line iPSM1_6
GDS812_development.stage_2_4_mod.txt	GEO	GDS812	-2.13672936952	Mus musculus	Preimplantation embryo development (MG-U74A)	development.stage	2-cell	blastocyst
GDS3113_tissue_1_23_mod.txt	GEO	GDS3113	-1.82129682353	Homo sapiens	Various normal tissues	tissue	adrenal gland	small intestine
GDS3113_tissue_7_29_mod.txt	GEO	GDS3113	3.71096338087	Homo sapiens	Various normal tissues	tissue	fetal liver	tonsil
E-GEOD-15792_33_1_2_mod.txt	ArrayExpress	E-GEOD-15792	-1.07174922329	Homo sapiens	Expression profiles in PCARNEQ ncRNA depletion in prostate cancer cells	FactorValue..TREATMENT.	siEGFP	siPCARNEQ
E-GEOD-23583_50_1_3_mod.txt	ArrayExpress	E-GEOD-23583	-4.35270220326	Homo sapiens	Highly efficient reprogramming to pluripotency and directed differentiation using synthetic mRNA	FactorValue..CELL.TYPE.	BJ fibroblast	iPS cells derived from BJ fibroblast
GDS639_age_1_3_mod.txt	GEO	GDS639	-2.44722064351	Mus musculus	Dystrophin-deficient mdx hindlimb muscle development time course	age	112 day	23 day
E-GEOD-12305_41_1_2_mod.txt	ArrayExpress	E-GEOD-12305	-3.44765095846	Homo sapiens	A 5 Sequence of Human HMGB2 Gene for Transcriptional Targeting of Glioblastoma	FactorValue..GROWTH.MEDIUM.	Astrocyte Basal Medium (ABM) and the following growth supplements: rhEGF, 0.5 ml; Insulin, 1.25 ml; Ascorbic Acid, 0.5 ml; GA-1000, 0.5 ml, L-Glutamine, 5.0 ml; FBS, 15 ml.	Dulbecco's Modified Eagle Medium and the following growth supplements: Penicillin/streptomycin, 5.0 ml; L-Glutamine, 5.0 ml; FBS, 15 ml.
GDS3113_tissue_6_24_mod.txt	GEO	GDS3113	1.41356328932	Homo sapiens	Various normal tissues	tissue	fetal kidney	spinal cord
GDS3388_individual_3_8_mod.txt	GEO	GDS3388	-2.70459994853	Homo sapiens	Bisphenol A effect on nonmalignant breast epithelial cell aspirates from breast cancer patients	individual	patient PA16	patient PA7
E-GEOD-20124_28_1_4_mod.txt	ArrayExpress	E-GEOD-20124	2.64159994826	Homo sapiens	Transcriptome analysis of human Whartons jelly stem cells: in-house analysis	FactorValue..CELL.TYPE.	embryonic carcinoma cell line	Wharton's jelly stem cell line
E-MEXP-1482_35_1_2_mod.txt	ArrayExpress	E-MEXP-1482	3.85511663981	Homo sapiens	Transcription profiling of human chronic lymphocytic leukemia samples and pRS-15/16 transfected MEG01 cell lines to identify MiR-15a and miR-16-1 cluster function in human leukemia	Factor.Value..cell.line.		MEG-01
E-GEOD-9894_31_2_4_mod.txt	ArrayExpress	E-GEOD-9894	3.19763985927	Homo sapiens	Transcription profiling of human culture-amplified and native bone marrow mesenchymal stem cells to characterize specific plasma membrane protein phenotype	Factor.Value.cell.type.	granulopoietic	mesenchymal stem cell
E-GEOD-27280_34_4_5_mod.txt	ArrayExpress	E-GEOD-27280	-3.46470106099	Homo sapiens	Pompe disease induced pluripotent stem cells for pathogenesis modeling, drug testing and disease marker identification	FactorValue..CELL.TYPE.	PomD-iPSC-CMLC	PomD-iPSCs
E-MEXP-563_32_1_2_mod.txt	ArrayExpress	E-MEXP-563	2.27108742703	Homo sapiens	Transcription profiling of human mesenchymal stem cells transformed with lentiviral vectors of TERT, E6, SV40 and RAS	Factor.Value..transfect.	hTERT	hTERT/HPVE6
E-GEOD-24705_38_1_9_mod.txt	ArrayExpress	E-GEOD-24705	-1.57209851083	Mus musculus	mRNA expression data from iPSCs	FactorValue..CELL.LINE.	ES cells cell line E14	ntiPS cell line ntiPSM1_8_3
E-GEOD-33199_29_6_7_mod.txt	ArrayExpress	E-GEOD-33199	-3.74579818647	Mus musculus	A mouse model of the most aggressive subgroup of human medulloblastoma [Mouse430 2]	FactorValue..VARIATION.	p53-/-, Cdkn2c-/-, Math1-GFP infected with mMycn/mRFP	p53-/-, Cdkn2c-/-, Math1-GFP FACS sort for GFP+
E-GEOD-20667_35_3_5_mod.txt	ArrayExpress	E-GEOD-20667	3.52508456176	Homo sapiens	The Notch/Hes1 pathway sustains NF-B activation through CYLD repression in T cell leukemia	FactorValue..CELL.LINE.	JCRB0033 [CEM]	KOPT-K
GDS3113_tissue_7_17_mod.txt	GEO	GDS3113	3.27004916512	Homo sapiens	Various normal tissues	tissue	fetal liver	placenta
GDS3113_tissue_2_5_mod.txt	GEO	GDS3113	-1.65474838569	Homo sapiens	Various normal tissues	tissue	bone marrow	fetal brain
E-GEOD-21447_43_4_7_mod.txt	ArrayExpress	E-GEOD-21447	-2.28774083292	Mus musculus	A global expression switch marks pachytene initiation during mouse male meiosis	FactorValue..MEIOTIC.FRACTION.	leptotene/zygotene	round spermatids
GDS3113_tissue_6_13_mod.txt	GEO	GDS3113	2.79708324331	Homo sapiens	Various normal tissues	tissue	fetal kidney	mammary gland
GDS3113_tissue_2_29_mod.txt	GEO	GDS3113	1.28133772898	Homo sapiens	Various normal tissues	tissue	bone marrow	tonsil
GDS3113_tissue_7_9_mod.txt	GEO	GDS3113	2.23407543055	Homo sapiens	Various normal tissues	tissue	fetal liver	heart
GDS3113_tissue_2_7_mod.txt	GEO	GDS3113	-2.42962565189	Homo sapiens	Various normal tissues	tissue	bone marrow	fetal liver
E-GEOD-24207_47_3_8_mod.txt	ArrayExpress	E-GEOD-24207	4.03218825879	Mus musculus	mRNA analysis in different mouse tissues	FactorValue..TISSUE.	bone marrow	insulinoma
E-GEOD-18147_24_3_4_mod.txt	ArrayExpress	E-GEOD-18147	3.18638894037	Homo sapiens	Dys and Eureprogramming	Factor.Value..CELL.TYPE.	induced human pluripotent stem cells	partially reprogrammed human induced pluripotent stem cells
E-GEOD-32670_60_1_3_mod.txt	ArrayExpress	E-GEOD-32670	4.20461551728	Homo sapiens	Time-course effect of estradiol and estradiol-BSA on early gene expression	FactorValue..CELL.LINE.	MCF-7	SKBR3
E-GEOD-24207_47_8_19_mod.txt	ArrayExpress	E-GEOD-24207	-3.33436641868	Mus musculus	mRNA analysis in different mouse tissues	FactorValue..TISSUE.	insulinoma	seminal vesicle
GDS3113_tissue_28_30_mod.txt	GEO	GDS3113	2.91894405928	Homo sapiens	Various normal tissues	tissue	thyroid	trachea
E-MEXP-2700_27_1_6_mod.txt	ArrayExpress	E-MEXP-2700	-1.28656604173	Homo sapiens	Investigating gradients of gene expression involved in early human cortical development	Factor.Value.AGE.	8	12.5
E-GEOD-24207_47_8_20_mod.txt	ArrayExpress	E-GEOD-24207	-3.97955755752	Mus musculus	mRNA analysis in different mouse tissues	FactorValue..TISSUE.	insulinoma	small intestine
E-GEOD-32670_60_1_4_mod.txt	ArrayExpress	E-GEOD-32670	3.85503855341	Homo sapiens	Time-course effect of estradiol and estradiol-BSA on early gene expression	FactorValue..CELL.LINE.	MCF-7	T47D
GDS3113_tissue_6_25_mod.txt	GEO	GDS3113	1.96311551932	Homo sapiens	Various normal tissues	tissue	fetal kidney	spleen
GDS1490_tissue_18_34_mod.txt	GEO	GDS1490	-1.93155509721	Mus musculus	Neural tissue profiling	tissue	medulla oblongata	white adipose tissue
GDS3113_tissue_19_26_mod.txt	GEO	GDS3113	2.50548241568	Homo sapiens	Various normal tissues	tissue	retina	testis
E-GEOD-20089_24_4_6_mod.txt	ArrayExpress	E-GEOD-20089	-4.49061110105	Homo sapiens	Pseudopod Experiment	Factor.Value..CELL.LINE.	MDA435	U87
E-GEOD-10971_35_8_11_mod.txt	ArrayExpress	E-GEOD-10971	-3.68854175867	Homo sapiens	Transcription profiling by array of human non-malignant fallopian tube epithelium and high grade serous carcinoma	Factor.Value.genotype.	BRCA1 mutation	not applicable
GDS3113_tissue_11_31_mod.txt	GEO	GDS3113	3.90844243651	Homo sapiens	Various normal tissues	tissue	liver	Universal Human Reference RNA
E-MEXP-3020_33_2_3_mod.txt	ArrayExpress	E-MEXP-3020	-3.88676018536	Homo sapiens	Low Dose PDT - Human Cells	Factor.Value..CELL_LINE.	PC3	U373
GDS3113_tissue_11_29_mod.txt	GEO	GDS3113	1.90102879666	Homo sapiens	Various normal tissues	tissue	liver	tonsil
GDS3113_tissue_1_11_mod.txt	GEO	GDS3113	-2.37358287669	Homo sapiens	Various normal tissues	tissue	adrenal gland	liver
E-GEOD-23938_38_2_3_mod.txt	ArrayExpress	E-GEOD-23938	-2.34594750605	Mus musculus	Comprehensive genomic profiling identified miRNA signatures associated with mammary tumor differentiation and development	FactorValue..GENETICALLY.ENGINEERED.MOUSE.MODEL.	C3TAg	MMTV-C-Myc
E-GEOD-29077_38_1_2_mod.txt	ArrayExpress	E-GEOD-29077	3.60811351211	Homo sapiens	Expression data comparing azacitidine and decitabine in non-small cell lung cancer lines	FactorValue..CELL.LINE.	A549	H1299
E-GEOD-23583_50_1_7_mod.txt	ArrayExpress	E-GEOD-23583	-4.21180102757	Homo sapiens	Highly efficient reprogramming to pluripotency and directed differentiation using synthetic mRNA	FactorValue..CELL.TYPE.	BJ fibroblast	iPS cells derived from MRC5 fibroblast
E-GEOD-34208_41_1_2_mod.txt	ArrayExpress	E-GEOD-34208	-6.38831691922	Mus musculus	Expression data of mouse ENCCs and mouse embryonic Gut E14.5	FactorValue..GENOTYPE.VARIATION.	Transgenic mice carrying Wnt1-Cre-recombinase and a LoxP/R26-YFP	wild type
GDS2416_individual_6_11_mod.txt	GEO	GDS2416	1.62593717426	Homo sapiens	Different areas of cervical cancer tumors	individual	patient 15	patient 9
GDS2819_individual_2_7_mod.txt	GEO	GDS2819	5.42130383537	Homo sapiens	Leukemic white blood cells and various RNA preparation protocols	individual	patient 10	patient 15
GDS3113_tissue_29_32_mod.txt	GEO	GDS3113	-2.12293096584	Homo sapiens	Various normal tissues	tissue	tonsil	uterus
E-GEOD-25469_33_1_2_mod.txt	ArrayExpress	E-GEOD-25469	1.50166296742	Mus musculus	Expression data from WT or p65-/- mouse embryonic fibroblasts (MEFs) infected with Toxoplasma gondii.	FactorValue..GENOTYPE.	NFkBp65-/-	WT
E-GEOD-24207_47_10_14_mod.txt	ArrayExpress	E-GEOD-24207	1.22240767945	Mus musculus	mRNA analysis in different mouse tissues	FactorValue..TISSUE.	liver	pancreatic acini
GDS2819_individual_3_11_mod.txt	GEO	GDS2819	-2.96924375665	Homo sapiens	Leukemic white blood cells and various RNA preparation protocols	individual	patient 11	patient 19
E-GEOD-30494_38_1_2_mod.txt	ArrayExpress	E-GEOD-30494	-2.84523665398	Homo sapiens	Expression data in cancer cell lines using Affymetrix GeneChip	FactorValue..CELL.LINE.	A549	SW780
GDS1363_disease.state_1_2_mod.txt	GEO	GDS1363	4.00933910368	Rattus norvegicus	N-methyl-N-nitrosourea-induced breast cancer model	disease.state	normal	tumor
E-GEOD-34907_29_1_2_mod.txt	ArrayExpress	E-GEOD-34907	-3.28001012951	Mus musculus	Genetic and epigenetic determinants of neurogenesis and myogenesis [expression profiling]	FactorValue..CELL.TYPE.	Neuronally differentiated MEF cells	Neuronally differentiated P19 cells
E-GEOD-24705_38_7_11_mod.txt	ArrayExpress	E-GEOD-24705	-1.18934055369	Mus musculus	mRNA expression data from iPSCs	FactorValue..CELL.LINE.	ntES cells cell line NTM2_4	ntiPS cell line ntiPSM2_4_3
GDS3135_tissue_2_3_mod.txt	GEO	GDS3135	2.67883687129	Rattus norvegicus	Brown adipose tissue response to fasting	tissue	liver	white adipose tissue
E-GEOD-32967_39_1_2_mod.txt	ArrayExpress	E-GEOD-32967	3.57234999361	Homo sapiens	Modeling lethal prostate cancer variant with small cell carcinoma features [expression profile]	FactorValue..HISTOLOGIC.TYPE.	adenocarcinoma	large cell neuroendocrine carcinoma
GDS3113_tissue_13_32_mod.txt	GEO	GDS3113	-2.33365417421	Homo sapiens	Various normal tissues	tissue	mammary gland	uterus
GDS3113_tissue_7_30_mod.txt	GEO	GDS3113	2.90719400664	Homo sapiens	Various normal tissues	tissue	fetal liver	trachea
E-GEOD-37258_34_1_3_mod.txt	ArrayExpress	E-GEOD-37258	-3.97188656586	Homo sapiens	Expression data of the iPSCs derived from foreskin fibroblast cells of normal person and KS patient	FactorValue..CELL.TYPE.	fibroblast	iPSC
E-GEOD-29328_32_1_5_mod.txt	ArrayExpress	E-GEOD-29328	-3.52218251898	Mus musculus	Expression data from squamous cell carcinoma stem cells	FactorValue..GENOTYPE.	K14cre;FAK(fl/fl)	wild type
GDS3113_tissue_1_3_mod.txt	GEO	GDS3113	-1.32167123217	Homo sapiens	Various normal tissues	tissue	adrenal gland	brain
E-GEOD-23938_38_4_9_mod.txt	ArrayExpress	E-GEOD-23938	2.29720203016	Mus musculus	Comprehensive genomic profiling identified miRNA signatures associated with mammary tumor differentiation and development	FactorValue..GENETICALLY.ENGINEERED.MOUSE.MODEL.	MMTV-H2N	p53-/-
GDS2819_individual_2_23_mod.txt	GEO	GDS2819	4.29439945647	Homo sapiens	Leukemic white blood cells and various RNA preparation protocols	individual	patient 10	patient 5
E-TABM-672_24_4_9_mod.txt	ArrayExpress	E-TABM-672	1.24033633563	Mus musculus	Transcription profiling of mouse embyronic stem cell line CGR8 during the first 10 days of differentiation into embryoid bodies	Factor.Value..Age.	3	10
E-GEOD-33167_31_1_2_mod.txt	ArrayExpress	E-GEOD-33167	-3.5521895407	Homo sapiens	Phenotypic Plasticity in Aggressive Triple-Negative Breast Cancer: Human Biology is Recapitulated by a Novel Model System	FactorValue..CELL.LINE.	Human breast cancer-derived cell line DKAT	Human breast cancer-derived cell line HMEC
GDS3113_tissue_22_30_mod.txt	GEO	GDS3113	1.37490820824	Homo sapiens	Various normal tissues	tissue	skin	trachea
E-GEOD-29045_30_2_4_mod.txt	ArrayExpress	E-GEOD-29045	-1.20043666138	Mus musculus	Genetic modification of STAT5 levels reveals dose-dependent and isoform-specific requirement for cell lineage progression and differentiation.	FactorValue..VARIATION.	Stat5ab+/null	Stat5abnull/Stat5b-
GDS1490_tissue_20_24_mod.txt	GEO	GDS1490	1.06583281862	Mus musculus	Neural tissue profiling	tissue	motor cortex	pituitary
E-GEOD-33199_29_8_10_mod.txt	ArrayExpress	E-GEOD-33199	-1.96669802722	Mus musculus	A mouse model of the most aggressive subgroup of human medulloblastoma [Mouse430 2]	FactorValue..VARIATION.	p53-/-, Cdkn2c-/-, Math1-GFP infected with mcMyc/mRFP	Ptc+/-, Cdkn2c-/-
E-GEOD-28185_36_1_2_mod.txt	ArrayExpress	E-GEOD-28185	3.02315186797	Homo sapiens	Non-steroidal anti-inflammatory drugs induce apoptosis and differentiation through an AP-1 and GADD45 dependent pathway in human acute myeloid leukemia cells	FactorValue..DISEASE.STATE.	monocytic leukemia	promyelocytic leukemia
E-GEOD-36643_30_1_4_mod.txt	ArrayExpress	E-GEOD-36643	2.65570585894	Homo sapiens	Ganglioside GD2 identifies Breast Cancer Stem Cells: Targeting GD3 Synthase Inhibits GD2 Expression and Tumor Growth	FactorValue..FACS.SORTED.CELL.POPULATION.	CD24_high	GD2+
GDS2819_individual_20_21_mod.txt	GEO	GDS2819	-4.06886077874	Homo sapiens	Leukemic white blood cells and various RNA preparation protocols	individual	patient 27	patient 3
GDS912_age_3_6_mod.txt	GEO	GDS912	-1.71404866561	Mus musculus	Hair follicle development: time course	age	1 d	5 mo
E-GEOD-30201_38_7_8_mod.txt	ArrayExpress	E-GEOD-30201	-1.85656368685	Homo sapiens	Expression data of ribosomal proteins from sorted hematopoietic stems cells from patients with low risk MDS.	FactorValue..AGE.	77	age matched
E-GEOD-26408_35_2_3_mod.txt	ArrayExpress	E-GEOD-26408	2.28140004314	Mus musculus	Signatures of murine B-cell development implicate Yy1 as a regulator of the germinal center-specific program	FactorValue..ORGANISM.PART.	spleen	Tumor
GDS3113_tissue_1_4_mod.txt	GEO	GDS3113	-2.25699282623	Homo sapiens	Various normal tissues	tissue	adrenal gland	colon
E-GEOD-24207_47_4_14_mod.txt	ArrayExpress	E-GEOD-24207	1.64769596006	Mus musculus	mRNA analysis in different mouse tissues	FactorValue..TISSUE.	brain	pancreatic acini
GDS2819_individual_10_19_mod.txt	GEO	GDS2819	3.10458966264	Homo sapiens	Leukemic white blood cells and various RNA preparation protocols	individual	patient 18	patient 26
GDS2819_individual_10_25_mod.txt	GEO	GDS2819	6.04890060426	Homo sapiens	Leukemic white blood cells and various RNA preparation protocols	individual	patient 18	patient 7
GDS2819_individual_11_18_mod.txt	GEO	GDS2819	2.74454815774	Homo sapiens	Leukemic white blood cells and various RNA preparation protocols	individual	patient 19	patient 25
E-GEOD-19639_26_2_3_mod.txt	ArrayExpress	E-GEOD-19639	2.36117224381	Homo sapiens	Transcription profiling by array of human estrogen receptor positive breast cancer cell lines after long-term estrogen deprivation	Factor.Value..cell.line.	MCF-7	MDA-361
GDS3233_disease.state_1_3_mod.txt	GEO	GDS3233	-4.85940368893	Homo sapiens	Cervical cancer tumorigenesis	disease.state	cervical cancer cell line	normal
E-GEOD-37316_40_1_2_mod.txt	ArrayExpress	E-GEOD-37316	2.10772262856	Mus musculus	Gene expression data from postnatal day 7 subventricular zone (SVZ)	FactorValue..VARIATION.	not specified	Ptch het p53 het
E-GEOD-34126_43_1_4_mod.txt	ArrayExpress	E-GEOD-34126	-5.56727866508	Mus musculus	An Animal Model of Myc-driven medulloblastoma	FactorValue..GENOTYPE.VARIATION.	not specified	wild type
GDS1490_tissue_28_34_mod.txt	GEO	GDS1490	-1.96571197794	Mus musculus	Neural tissue profiling	tissue	spinal cord	white adipose tissue
GDS2819_individual_18_23_mod.txt	GEO	GDS2819	-1.43692987946	Homo sapiens	Leukemic white blood cells and various RNA preparation protocols	individual	patient 25	patient 5
GDS2819_disease.state_1_4_mod.txt	GEO	GDS2819	1.48056786322	Homo sapiens	Leukemic white blood cells and various RNA preparation protocols	disease.state	ALL with hyperdiploid karyotype	AML with normal karyotype and other abnormalities
E-GEOD-23938_38_2_5_mod.txt	ArrayExpress	E-GEOD-23938	-3.03747917806	Mus musculus	Comprehensive genomic profiling identified miRNA signatures associated with mammary tumor differentiation and development	FactorValue..GENETICALLY.ENGINEERED.MOUSE.MODEL.	C3TAg	MMTV-Hras
GDS2958_cell.type_1_2_mod.txt	GEO	GDS2958	7.0014583541	Homo sapiens	Tumor suppressor PTEN depletion effect on various cell lines	cell.type	epidermoid carcinoma	mammary adenocarcinoma
E-GEOD-27220_37_3_4_mod.txt	ArrayExpress	E-GEOD-27220	2.64965213347	Homo sapiens	Transcriptional effects of 1,25 dihydroxi-vitamin D3 physiological and supra-physiological concentrations in breast cancer organotypic culture	FactorValue..AGE.	74	76
E-GEOD-24207_47_16_22_mod.txt	ArrayExpress	E-GEOD-24207	1.11293795941	Mus musculus	mRNA analysis in different mouse tissues	FactorValue..TISSUE.	pituitary gland	testis
E-GEOD-21664_33_2_4_mod.txt	ArrayExpress	E-GEOD-21664	-1.58095106641	Mus musculus	Transcription profiling by array of interleukin-7-dependent and BCR-ABL1-transformed Mus musculus pre-B cells	Factor.Value..TREATMENT.	STI571 in absence of IL-7	withdrawal of IL-7
E-GEOD-17482_23_1_2_mod.txt	ArrayExpress	E-GEOD-17482	2.420050191	Homo sapiens	Gene expression profiles regulated by Stat5a/b vs. Stat3 in human prostate cancer cells.	Factor.Value..CELL.LINE.	CWR22Rv1	DU145
E-GEOD-25098_33_2_3_mod.txt	ArrayExpress	E-GEOD-25098	-8.11102198779	Mus musculus	Rhabdomyosarcoma can be initiated in activated Pax7+ Muscle Progenitor Cells	FactorValue..TISSUE.	Lineage Depleted Tumor	Normal Muscle
E-GEOD-24705_39_3_4_mod.txt	ArrayExpress	E-GEOD-24705	-1.12749568902	Mus musculus	mRNA expression data from iPSCs	FactorValue..CELL.TYPE.	nuclear transfer ES cells	nuclear transfer ES cells from induced pluripotent stem cells
GDS2091_cell.type_1_3_mod.txt	GEO	GDS2091	2.72642690588	Mus musculus	DNA demethylation effect on terminally differentiated cells	cell.type	chondrocyte	osteoblast
E-GEOD-24705_38_3_9_mod.txt	ArrayExpress	E-GEOD-24705	-2.68228107751	Mus musculus	mRNA expression data from iPSCs	FactorValue..CELL.LINE.	iPS cell line iPSM1_8	ntiPS cell line ntiPSM1_8_3
GDS3113_tissue_13_30_mod.txt	GEO	GDS3113	-1.01449258259	Homo sapiens	Various normal tissues	tissue	mammary gland	trachea
GDS3113_tissue_1_8_mod.txt	GEO	GDS3113	-2.59974362463	Homo sapiens	Various normal tissues	tissue	adrenal gland	fetal thymus
E-GEOD-24207_47_8_22_mod.txt	ArrayExpress	E-GEOD-24207	-3.12512025481	Mus musculus	mRNA analysis in different mouse tissues	FactorValue..TISSUE.	insulinoma	testis
E-GEOD-27220_37_2_4_mod.txt	ArrayExpress	E-GEOD-27220	2.82821430993	Homo sapiens	Transcriptional effects of 1,25 dihydroxi-vitamin D3 physiological and supra-physiological concentrations in breast cancer organotypic culture	FactorValue..AGE.	70	76
E-GEOD-24207_47_3_14_mod.txt	ArrayExpress	E-GEOD-24207	1.33200264731	Mus musculus	mRNA analysis in different mouse tissues	FactorValue..TISSUE.	bone marrow	pancreatic acini
E-GEOD-20089_24_1_4_mod.txt	ArrayExpress	E-GEOD-20089	-1.32847685557	Homo sapiens	Pseudopod Experiment	Factor.Value..CELL.LINE.	DU145	MDA435
E-GEOD-12305_42_1_2_mod.txt	ArrayExpress	E-GEOD-12305	-3.44765095846	Homo sapiens	A 5 Sequence of Human HMGB2 Gene for Transcriptional Targeting of Glioblastoma	FactorValue..PASSAGE.	4	50
E-GEOD-31545_39_1_2_mod.txt	ArrayExpress	E-GEOD-31545	-5.06557442745	Homo sapiens	Stem-like glioma-propagating cells contribute to molecular heterogeneity and survival outcome in oligodendroglial tumors	FactorValue..GRADE.	III	IV
E-GEOD-26408_34_3_4_mod.txt	ArrayExpress	E-GEOD-26408	-3.90538097816	Mus musculus	Signatures of murine B-cell development implicate Yy1 as a regulator of the germinal center-specific program	FactorValue..GENOTYPE.	Lig4/p53 double knock-out	Wild-type
E-GEOD-29832_34_2_4_mod.txt	ArrayExpress	E-GEOD-29832	1.16477814782	Homo sapiens	Expression data from pure/mixed blood and breast to test feasability of deconvolution of clinical samples	FactorValue..TISSUE.	67% blood and 33% breast	breast
E-GEOD-33199_29_6_10_mod.txt	ArrayExpress	E-GEOD-33199	-2.44247680734	Mus musculus	A mouse model of the most aggressive subgroup of human medulloblastoma [Mouse430 2]	FactorValue..VARIATION.	p53-/-, Cdkn2c-/-, Math1-GFP infected with mMycn/mRFP	Ptc+/-, Cdkn2c-/-
GDS1209_disease.state_1_2_mod.txt	GEO	GDS1209	2.44074817934	Homo sapiens	Sarcoma and hypoxia	disease.state	normal	sarcoma
GDS639_age_5_6_mod.txt	GEO	GDS639	-1.69717332487	Mus musculus	Dystrophin-deficient mdx hindlimb muscle development time course	age	56 day	7 day
GDS3113_tissue_16_19_mod.txt	GEO	GDS3113	-1.15578184274	Homo sapiens	Various normal tissues	tissue	peripheral blood lymphocyte	retina
GDS3113_tissue_26_32_mod.txt	GEO	GDS3113	-2.11301269704	Homo sapiens	Various normal tissues	tissue	testis	uterus
E-GEOD-24547_44_2_4_mod.txt	ArrayExpress	E-GEOD-24547	-3.73673240621	Homo sapiens	Transcriptional pathway signatures for the Aurora inhibitor Danusertib	FactorValue..CELL.LINE.	COLO205	MCF7
E-GEOD-19729_38_1_2_mod.txt	ArrayExpress	E-GEOD-19729	-2.2775352303	Mus musculus	Interactions between developing B-lymphocytes and stromal cells reveal complex interactions and two-way communication	FactorValue..STRAIN.	B6C3F1	BALB/c
E-GEOD-15904_24_3_8_mod.txt	ArrayExpress	E-GEOD-15904	1.88626197969	Mus musculus	Transcription profiling by array of mouse mammary tumors	Factor.Value..HISTOLOGICAL.SUBTYPE.	Microacinar	Squamous
E-GEOD-32670_60_2_4_mod.txt	ArrayExpress	E-GEOD-32670	4.17953364293	Homo sapiens	Time-course effect of estradiol and estradiol-BSA on early gene expression	FactorValue..CELL.LINE.	MDA-MB-231	T47D
E-MEXP-2963_30_1_2_mod.txt	ArrayExpress	E-MEXP-2963	1.86538462628	Mus musculus	Transcription profiling by array of mouse embryonic stem cells from wildtype and LRRK2-deficient mice to investigate the effects of LRRK2 on neuronal differentiation	Factor.Value..GENOTYPE.	LRKK2+/- knock out	wild_type
E-GEOD-24207_47_7_8_mod.txt	ArrayExpress	E-GEOD-24207	3.60040622534	Mus musculus	mRNA analysis in different mouse tissues	FactorValue..TISSUE.	heart	insulinoma
GDS3113_tissue_9_17_mod.txt	GEO	GDS3113	1.03597373457	Homo sapiens	Various normal tissues	tissue	heart	placenta
GDS2819_individual_19_20_mod.txt	GEO	GDS2819	1.68527965429	Homo sapiens	Leukemic white blood cells and various RNA preparation protocols	individual	patient 26	patient 27
GDS2819_individual_2_20_mod.txt	GEO	GDS2819	5.44518190153	Homo sapiens	Leukemic white blood cells and various RNA preparation protocols	individual	patient 10	patient 27
E-GEOD-18500_76_1_2_mod.txt	ArrayExpress	E-GEOD-18500	2.83374116703	Mus musculus	Mast cells in response to some pathogens elicit a transcriptional program devoid of type I IFN response	FactorValue..CELL.TYPE.	macrophage	mast cells
E-GEOD-25098_32_6_7_mod.txt	ArrayExpress	E-GEOD-25098	-8.1887714241	Mus musculus	Rhabdomyosarcoma can be initiated in activated Pax7+ Muscle Progenitor Cells	FactorValue..GENOTYPE.VARIATION.	Rosa26-CreER; LSL-KrasG12D;Trp53Flox/Flox	Wild Type mice
E-GEOD-11259_34_1_3_mod.txt	ArrayExpress	E-GEOD-11259	2.7889561919	Mus musculus	Transcription profiling of mouse BALB/c strain animals injected with breast cancer 4T1-derived cells to investigate the role of epithelial to mesenchymal transition (EMT) in spontaneous breast cancer metastasis	Factor.Value..CELLLINE.	4T1	67NR
GDS3113_tissue_23_26_mod.txt	GEO	GDS3113	1.3388244747	Homo sapiens	Various normal tissues	tissue	small intestine	testis
GDS2819_individual_10_18_mod.txt	GEO	GDS2819	5.07601675133	Homo sapiens	Leukemic white blood cells and various RNA preparation protocols	individual	patient 18	patient 25
GDS3592_specimen_1_2_mod.txt	GEO	GDS3592	-4.87824849298	Homo sapiens	Ovarian normal surface epithelia and ovarian cancer epithelial cells	specimen	ovarian cancer epithelial cells	ovarian surface epithelia
GDS1956_disease.state_2_5_mod.txt	GEO	GDS1956	1.44236705205	Homo sapiens	Various muscle diseases (HG-U133A)	disease.state	amyotophic lateral sclerosis	Duchenne muscular dystrophy
E-GEOD-14990_26_1_2_mod.txt	ArrayExpress	E-GEOD-14990	-2.24517711496	Homo sapiens	MYC regulation of a poor prognosis metastatic cancer cell state	Factor.Value..CELL.LINE.	LNCaP	MCF10A
GDS2819_individual_2_15_mod.txt	GEO	GDS2819	5.11462954828	Homo sapiens	Leukemic white blood cells and various RNA preparation protocols	individual	patient 10	patient 22
GDS3113_tissue_24_28_mod.txt	GEO	GDS3113	-2.54991668789	Homo sapiens	Various normal tissues	tissue	spinal cord	thyroid
E-GEOD-21299_35_1_2_mod.txt	ArrayExpress	E-GEOD-21299	1.23962286627	Mus musculus	Expression data from murine cell line transduced with epitope tagged forms of Hoxa9	FactorValue..TIME.POINT.	day 0	day 3
E-GEOD-24705_38_7_8_mod.txt	ArrayExpress	E-GEOD-24705	-1.33261894731	Mus musculus	mRNA expression data from iPSCs	FactorValue..CELL.LINE.	ntES cells cell line NTM2_4	ntiPS cell line ntiPSM1_6_5
GDS2819_disease.state_4_9_mod.txt	GEO	GDS2819	-4.12873405365	Homo sapiens	Leukemic white blood cells and various RNA preparation protocols	disease.state	AML with normal karyotype and other abnormalities	T-ALL
E-GEOD-20696_34_1_2_mod.txt	ArrayExpress	E-GEOD-20696	1.85766215582	Mus musculus	Expression profiling of 3T3-L1 adipogenesis	FactorValue..CELL.TYPE.	3T3-L1 adipocyte	3T3-L1 pre-adipocyte
E-GEOD-22381_38_1_2_mod.txt	ArrayExpress	E-GEOD-22381	-6.82789314117	Mus musculus	Identification of downstream transcriptional targets of Dlx5 during early mouse inner ear (otocyst/otic vesicle) development	FactorValue..AGE.	4 days post-differentiation in-vitro	E10
E-GEOD-34126_41_1_2_mod.txt	ArrayExpress	E-GEOD-34126	2.5987560426	Mus musculus	An Animal Model of Myc-driven medulloblastoma	FactorValue..CELL.SOURCE.	normal (uninfected) cerebellar stem cells	patched tumors
GDS2418_disease.state_1_2_mod.txt	GEO	GDS2418	5.21267945242	Homo sapiens	Vulvar intraepithelial neoplasia	disease.state	control	vulvar intraepithelial neoplasia
E-GEOD-26408_34_2_3_mod.txt	ArrayExpress	E-GEOD-26408	3.46926625154	Mus musculus	Signatures of murine B-cell development implicate Yy1 as a regulator of the germinal center-specific program	FactorValue..GENOTYPE.	Bcl6/Myc dual-transgenic	Lig4/p53 double knock-out
GDS1381_individual_2_3_mod.txt	GEO	GDS1381	3.26584225731	Homo sapiens	Carboplatin sensitive and resistant ovarian carcinoma	individual	patient 2	patient 3
E-GEOD-10971_35_2_12_mod.txt	ArrayExpress	E-GEOD-10971	3.67798147649	Homo sapiens	Transcription profiling by array of human non-malignant fallopian tube epithelium and high grade serous carcinoma	Factor.Value.genotype.	BRCA1 185delAG	Unknown
GDS3113_tissue_4_25_mod.txt	GEO	GDS3113	1.16119423058	Homo sapiens	Various normal tissues	tissue	colon	spleen
GDS3113_tissue_6_16_mod.txt	GEO	GDS3113	1.2267411932	Homo sapiens	Various normal tissues	tissue	fetal kidney	peripheral blood lymphocyte
E-MEXP-2700_27_1_4_mod.txt	ArrayExpress	E-MEXP-2700	-1.05317462476	Homo sapiens	Investigating gradients of gene expression involved in early human cortical development	Factor.Value.AGE.	8	10.5
E-GEOD-12198_26_3_4_mod.txt	ArrayExpress	E-GEOD-12198	-1.84013214551	Homo sapiens	Transcription profiling by array of human natural killer cells	FactorValue.TREATMENT.	NKAES	none
E-GEOD-27424_32_1_2_mod.txt	ArrayExpress	E-GEOD-27424	1.28889274304	Homo sapiens	NOTCH3 knockdown in non-transformed human esophageal cells	FactorValue..VARIATION.	STR-pGIPZ scramble	STR-pGIPZ shNotch3
E-GEOD-13873_35_1_4_mod.txt	ArrayExpress	E-GEOD-13873	3.55984458255	Mus musculus	Expression data from murine gastric epithelium	FactorValue..PATHOLOGY.	gastritis	n/a
GDS3113_tissue_1_22_mod.txt	GEO	GDS3113	-2.65123166249	Homo sapiens	Various normal tissues	tissue	adrenal gland	skin
E-GEOD-29828_44_1_2_mod.txt	ArrayExpress	E-GEOD-29828	5.20575257893	Homo sapiens	Expression Profiling of Mixed Lineage Leukemia Cells Treated with a Potent Small-Molecule DOT1L Inhibitor	FactorValue..CELL.LINE.DESCRIPTION.	acute myeloid leukemia (MLL-AF9 rearrangement)	biphenotypic B myelomonocytic leukemia (MLL-AF4 rearragenment)
E-GEOD-20987_29_2_3_mod.txt	ArrayExpress	E-GEOD-20987	1.13998144673	Mus musculus	Gene expression data of BCR-ABL1 transformed B cell precursors from BCL6 wild-type and BCL6 knockout mice	Factor.Value..CELL.TYPE.	Bcl6 +/+ BCR-ABL1-transformed B cell precursors	Bcl6 +/+ BCR-ABL1 transformed B cell precursors
GDS1962_disease.state_3_4_mod.txt	GEO	GDS1962	1.06924571434	Homo sapiens	Glioma-derived stem cell factor effect on angiogenesis in the brain	disease.state	non-tumor	oligodendrogliomas
E-GEOD-17539_28_1_2_mod.txt	ArrayExpress	E-GEOD-17539	-1.9412956265	Homo sapiens	Transcription profiling by array of human grafted engineered skin substitutes	Factor.Value.organism.part.	cultured skin substitute	skin
GDS1490_tissue_3_7_mod.txt	GEO	GDS1490	1.33938938025	Mus musculus	Neural tissue profiling	tissue	bed nucleus stria terminalis	choroid plexus fourth ventricle
E-GEOD-37258_34_1_2_mod.txt	ArrayExpress	E-GEOD-37258	-4.15104151447	Homo sapiens	Expression data of the iPSCs derived from foreskin fibroblast cells of normal person and KS patient	FactorValue..CELL.TYPE.	fibroblast	hESC
GDS2819_disease.state_3_9_mod.txt	GEO	GDS2819	-4.23738432114	Homo sapiens	Leukemic white blood cells and various RNA preparation protocols	disease.state	ALL with t 12, 21	T-ALL
E-GEOD-30304_41_1_2_mod.txt	ArrayExpress	E-GEOD-30304	2.82835655008	Homo sapiens	Gene expression profiling of prostate epithelial cells in response to tissue contextual changes	FactorValue..CELL.LINE.	LNCaP cells (prostate cancer cells)	RWPE-1 (immortalized prostate epithelial cells)
E-GEOD-15904_24_4_6_mod.txt	ArrayExpress	E-GEOD-15904	-1.20322957936	Mus musculus	Transcription profiling by array of mouse mammary tumors	Factor.Value..HISTOLOGICAL.SUBTYPE.	Mix	Papillary
E-GEOD-24207_47_2_8_mod.txt	ArrayExpress	E-GEOD-24207	3.84633599059	Mus musculus	mRNA analysis in different mouse tissues	FactorValue..TISSUE.	adrenal gland	insulinoma
E-TABM-1091_32_5_6_mod.txt	ArrayExpress	E-TABM-1091	1.6224869981	Homo sapiens	Transcriptiion profiling by array of human ratiometric mixes of high quality RNA from different tissues using different labeling protocols to provide a mechanism for assessing process improvement	Factor.Value..BATCH.	Batch5	n/a
E-GEOD-24705_39_1_4_mod.txt	ArrayExpress	E-GEOD-24705	-1.59452516112	Mus musculus	mRNA expression data from iPSCs	FactorValue..CELL.TYPE.	embryonic stem cells	nuclear transfer ES cells from induced pluripotent stem cells
E-MEXP-955_44_1_2_mod.txt	ArrayExpress	E-MEXP-955	-1.02271858869	Mus musculus	Transcription profiling of mouse embryonic stem cells	Factor.Value..cell.type.	embryonic stem cell	epiblast
E-GEOD-30355_34_1_3_mod.txt	ArrayExpress	E-GEOD-30355	1.16254326294	Homo sapiens	Human keratinocytes have a response to injury that upregulates CCL20 and other genes linking innate and adaptive immunity	FactorValue..GROUP.	KC LCM	KC vitro
E-MEXP-3020_33_1_3_mod.txt	ArrayExpress	E-MEXP-3020	-5.61388706652	Homo sapiens	Low Dose PDT - Human Cells	Factor.Value..CELL_LINE.	DU145	U373
GDS2819_individual_9_25_mod.txt	GEO	GDS2819	2.27505572406	Homo sapiens	Leukemic white blood cells and various RNA preparation protocols	individual	patient 17	patient 7
E-GEOD-19732_23_2_5_mod.txt	ArrayExpress	E-GEOD-19732	1.12477321019	Mus musculus	Identification of genes characteristic of committed preadipocyte fibroblasts	Factor.Value..CELL.LINE.	Swiss2	Swiss5
GDS2958_cell.line_1_2_mod.txt	GEO	GDS2958	9.82043296775	Homo sapiens	Tumor suppressor PTEN depletion effect on various cell lines	cell.line	A431	HCC827
GDS1765_cell.type_1_2_mod.txt	GEO	GDS1765	2.40912508814	Mus musculus	Extraocular and hindlimb skeletal muscle cell differentiation: time course (MG-430A)	cell.type	extraocular muscle	hindlimb muscle
GDS2615_individual_1_3_mod.txt	GEO	GDS2615	1.03761582132	Homo sapiens	Mucociliary differentiation of airway epithelial cells	individual	donor 1	donor 3
E-GEOD-10971_34_1_2_mod.txt	ArrayExpress	E-GEOD-10971	-4.04981590323	Homo sapiens	Transcription profiling by array of human non-malignant fallopian tube epithelium and high grade serous carcinoma	Factor.Value.disease.state.	high grade serous carcinoma	normal
E-GEOD-15303_31_1_2_mod.txt	ArrayExpress	E-GEOD-15303	-1.21445380737	Mus musculus	Identification of Myelin-gene Regulatory Factor as a Critical Transcriptional Regulator Required for CNS Myelination	FactorValue..CELL.	Cultured oligodendrocyte progenitors	Cultured oligodendrocytes
GDS651_disease.state_1_3_mod.txt	GEO	GDS651	-1.0342221851	Homo sapiens	Heart failure arising from different etiologies	disease.state	idiopathic dilated	normal
E-TABM-1091_30_1_3_mod.txt	ArrayExpress	E-TABM-1091	-1.35561282415	Homo sapiens	Transcriptiion profiling by array of human ratiometric mixes of high quality RNA from different tissues using different labeling protocols to provide a mechanism for assessing process improvement	Factor.Value..INPUT_RNA.	0.02 micrograms	0.1 micrograms
GDS1779_cell.type_1_2_mod.txt	GEO	GDS1779	3.36925122404	Homo sapiens	Hypoxia effect on astrocytes	cell.type	astrocyte	HeLa
GDS3548_time_1_3_mod.txt	GEO	GDS3548	1.23980427426	Mus musculus	Cigarette smoke-induced pulmonary emphysema model	time	1.5 mo	6 mo
E-GEOD-20089_24_1_6_mod.txt	ArrayExpress	E-GEOD-20089	-5.75383238165	Homo sapiens	Pseudopod Experiment	Factor.Value..CELL.LINE.	DU145	U87
E-GEOD-27987_35_4_8_mod.txt	ArrayExpress	E-GEOD-27987	-1.67608293727	Mus musculus	Differential pre-mRNA processing in Crebbp+/- mice	FactorValue..CELL.TYPE.	Crebbp+/- MEF	Ep300+/+ FLHSC
E-GEOD-22798_36_1_3_mod.txt	ArrayExpress	E-GEOD-22798	8.93387149147	Mus musculus	Expression data from Pax7+ satellite cell derived tumors in vitro and in vivo	FactorValue..SAMPLE.TYPE.	normal muscle as control for myogenic tumors	tumors derived from Pax7-expressing cells in vivo
E-GEOD-14519_33_1_4_mod.txt	ArrayExpress	E-GEOD-14519	-1.90232710616	Homo sapiens	Transcription profiling by array of human multiple myeloma cell lines after treatment with arsenic	Factor.Value.cell.line.	8226/S	U266
E-GEOD-29328_32_2_5_mod.txt	ArrayExpress	E-GEOD-29328	-3.84504021843	Mus musculus	Expression data from squamous cell carcinoma stem cells	FactorValue..GENOTYPE.	K14cre;TbRII(fl/fl)	wild type
E-MEXP-563_32_1_4_mod.txt	ArrayExpress	E-MEXP-563	2.11758223088	Homo sapiens	Transcription profiling of human mesenchymal stem cells transformed with lentiviral vectors of TERT, E6, SV40 and RAS	Factor.Value..transfect.	hTERT	hTERT/HPVE6/HPVE7/SV40t
E-GEOD-20089_24_1_5_mod.txt	ArrayExpress	E-GEOD-20089	-5.72448403459	Homo sapiens	Pseudopod Experiment	Factor.Value..CELL.LINE.	DU145	U251
GDS1265_age_2_4_mod.txt	GEO	GDS1265	2.55343081915	Mus musculus	Oocyte development (MOE430A)	age	17 d	2 d
E-GEOD-24207_47_14_17_mod.txt	ArrayExpress	E-GEOD-24207	-1.01979581559	Mus musculus	mRNA analysis in different mouse tissues	FactorValue..TISSUE.	pancreatic acini	placenta
E-GEOD-24705_38_3_8_mod.txt	ArrayExpress	E-GEOD-24705	-2.76965439714	Mus musculus	mRNA expression data from iPSCs	FactorValue..CELL.LINE.	iPS cell line iPSM1_8	ntiPS cell line ntiPSM1_6_5
E-GEOD-18322_27_2_4_mod.txt	ArrayExpress	E-GEOD-18322	-1.08119697957	Mus musculus	Gene Expression Analysis of Ara-C Resistance in AML	Factor.Value..CELL.LINE.	B117P	B140P
GDS1490_tissue_7_34_mod.txt	GEO	GDS1490	-1.86174956566	Mus musculus	Neural tissue profiling	tissue	choroid plexus fourth ventricle	white adipose tissue
GDS2237_time_1_4_mod.txt	GEO	GDS2237	-5.21740542571	Rattus norvegicus	Liver response to skin burn: time course	time	1 d	7 d
E-GEOD-25488_40_5_8_mod.txt	ArrayExpress	E-GEOD-25488	-2.16936360162	Mus musculus	Expression data from C3(1)Tag mammary tumors	FactorValue..GENOTYPE.	p53 KO ER neg	ras
GDS3113_tissue_19_31_mod.txt	GEO	GDS3113	4.52281432432	Homo sapiens	Various normal tissues	tissue	retina	Universal Human Reference RNA
GDS3516_disease.state_4_8_mod.txt	GEO	GDS3516	-1.02055986878	Homo sapiens	Nodular lymphocyte-predominant Hodgkin lymphoma: lymphocytic and histiocytic cells	disease.state	follicular lymphoma	normal memory B-cells
E-GEOD-18680_37_1_2_mod.txt	ArrayExpress	E-GEOD-18680	2.25225328314	Homo sapiens	Gene expression profile of human ovarian cancer cell lines in vitro	FactorValue..CELL.LINE.	parental IGROV	parental SKOV
E-GEOD-27546_38_6_8_mod.txt	ArrayExpress	E-GEOD-27546	-1.01086645658	Mus musculus	Effects of HMGN variants on cellular transcription profile	FactorValue..GENOTYPE.VARIATION.	HMGN1_N3swap	HMGN3 knock out
E-GEOD-29848_38_2_3_mod.txt	ArrayExpress	E-GEOD-29848	-1.09876293533	Mus musculus	Microarray data of differentiating embryonic stem cells overexpressing the transcription factor Msgn1	FactorValue..TREATMENT.	Day2 EBs cultured for another 24h	Day2 EBs cultured for another 48h
GDS1490_tissue_3_24_mod.txt	GEO	GDS1490	1.47386253863	Mus musculus	Neural tissue profiling	tissue	bed nucleus stria terminalis	pituitary
E-GEOD-14034_69_1_2_mod.txt	ArrayExpress	E-GEOD-14034	-2.88789012938	Homo sapiens	Alterations in Gene Expression in Human Mesothelial Cells Correlate with Mineral Pathogenicity	FactorValue..CELL.LINE.	IOSE 398	LP9/TERT-1
GDS2604_cell.line_1_2_mod.txt	GEO	GDS2604	7.74509838251	Homo sapiens	Asbestos effect on epithelial and mesothelial lung cell lines: time course	cell.line	A549	Beas2B
E-GEOD-15155_32_1_2_mod.txt	ArrayExpress	E-GEOD-15155	1.29522041239	Mus musculus	Gene profiling of quiescent and activated skeletal muscle satellite cells by an in vivo approach	FactorValue..AGE.	adult (6weeks)	cultured (3days)
E-GEOD-34126_41_1_4_mod.txt	ArrayExpress	E-GEOD-34126	5.39848920197	Mus musculus	An Animal Model of Myc-driven medulloblastoma	FactorValue..CELL.SOURCE.	normal (uninfected) cerebellar stem cells	stem cell-derived tumors
E-GEOD-26408_34_1_3_mod.txt	ArrayExpress	E-GEOD-26408	2.96800244224	Mus musculus	Signatures of murine B-cell development implicate Yy1 as a regulator of the germinal center-specific program	FactorValue..GENOTYPE.	Bcl6 knock-in	Lig4/p53 double knock-out
E-GEOD-21299_35_2_4_mod.txt	ArrayExpress	E-GEOD-21299	2.11365616619	Mus musculus	Expression data from murine cell line transduced with epitope tagged forms of Hoxa9	FactorValue..TIME.POINT.	day 3	day 5
GDS1630_cell.line_1_2_mod.txt	GEO	GDS1630	3.28775501199	Homo sapiens	Immortalized endothelial cell line response to atorvastatin	cell.line	immortalized	primary
GDS2472_agent_1_4_mod.txt	GEO	GDS2472	-1.51961358343	Rattus norvegicus	Glucosamine and interleukin-1 beta effect on chondrocytes	agent	control	IL-1 and glucosamine
GDS1962_tissue_1_4_mod.txt	GEO	GDS1962	1.11955425946	Homo sapiens	Glioma-derived stem cell factor effect on angiogenesis in the brain	tissue	not applicable	tumor grade IV
E-GEOD-15904_24_3_4_mod.txt	ArrayExpress	E-GEOD-15904	1.33201334516	Mus musculus	Transcription profiling by array of mouse mammary tumors	Factor.Value..HISTOLOGICAL.SUBTYPE.	Microacinar	Mix
GDS3113_tissue_11_25_mod.txt	GEO	GDS3113	1.27778428104	Homo sapiens	Various normal tissues	tissue	liver	spleen
E-GEOD-33688_33_1_2_mod.txt	ArrayExpress	E-GEOD-33688	-1.4910939238	Mus musculus	Genome-wide analyses reveal the extent of opportunistic STAT5 binding that does not yield transcriptional activation of neighboring genes	FactorValue..VARATION.	KO	S5
GDS3113_tissue_4_17_mod.txt	GEO	GDS3113	1.34352453046	Homo sapiens	Various normal tissues	tissue	colon	placenta
E-GEOD-35416_34_2_5_mod.txt	ArrayExpress	E-GEOD-35416	1.44760092456	Mus musculus	Transcriptional profiling of mouse inner cell mass of the blastocyst	FactorValue..CELL.TYPE.	ESCs passage 9-14 cultured in LIF and Serum	MEFs passage 2 cultured in Serum
E-GEOD-18269_56_1_2_mod.txt	ArrayExpress	E-GEOD-18269	-2.70180568697	Homo sapiens	HepaRG cells as a model of the primary human hepatocyte transcriptome	FactorValue..DIFFERENTIATION.STATE.	differentiated	not specified
E-MEXP-3020_33_2_4_mod.txt	ArrayExpress	E-MEXP-3020	-4.32457894592	Homo sapiens	Low Dose PDT - Human Cells	Factor.Value..CELL_LINE.	PC3	U87
E-GEOD-24547_47_2_3_mod.txt	ArrayExpress	E-GEOD-24547	-1.73584163796	Homo sapiens	Transcriptional pathway signatures for the Aurora inhibitor Danusertib	FactorValue..TISSUE.ORIGIN.	colon	Ovary
E-GEOD-24207_47_8_16_mod.txt	ArrayExpress	E-GEOD-24207	-4.23805821422	Mus musculus	mRNA analysis in different mouse tissues	FactorValue..TISSUE.	insulinoma	pituitary gland
E-GEOD-31324_57_6_7_mod.txt	ArrayExpress	E-GEOD-31324	1.49833579627	Homo sapiens	Expression data of freshly microdissected human hair follicle dermal papilla and its comparisons	FactorValue..TREATMENT.	dermal papilla freshly-microdissected	fibroblasts cultured
GDS2819_individual_19_22_mod.txt	GEO	GDS2819	2.15105347881	Homo sapiens	Leukemic white blood cells and various RNA preparation protocols	individual	patient 26	patient 4
GDS3113_tissue_1_27_mod.txt	GEO	GDS3113	-1.1455722581	Homo sapiens	Various normal tissues	tissue	adrenal gland	thymus
E-GEOD-24547_44_3_5_mod.txt	ArrayExpress	E-GEOD-24547	2.01465320223	Homo sapiens	Transcriptional pathway signatures for the Aurora inhibitor Danusertib	FactorValue..CELL.LINE.	HCT-116	MDA-MB-468
E-GEOD-19076_33_3_4_mod.txt	ArrayExpress	E-GEOD-19076	-1.84274149155	Mus musculus	Expression data from wild type	FactorValue..GENOTYPE.	Ring1B/Eed double mutant ES cell line generated by gene targeting of Ring1B in Eed deficient ES cells	wild type (Wutz et al., 2000)
GDS2366_development.stage_2_3_mod.txt	GEO	GDS2366	-1.22515265626	Homo sapiens	Preadipocytes from anatomically separate fat depots (HG-U133A)	development.stage	hTERT expressing	undifferentiated
GDS639_age_3_4_mod.txt	GEO	GDS639	2.33683195136	Mus musculus	Dystrophin-deficient mdx hindlimb muscle development time course	age	23 day	28 day
E-GEOD-27987_35_1_4_mod.txt	ArrayExpress	E-GEOD-27987	1.47718872585	Mus musculus	Differential pre-mRNA processing in Crebbp+/- mice	FactorValue..CELL.TYPE.	Cdkn1a-/- FLHSC	Crebbp+/- MEF
GDS3150_cell.type_1_2_mod.txt	GEO	GDS3150	3.13338639415	Rattus norvegicus	Renal inner medullary collecting duct cells	cell.type	control	inner medullary collecting duct cell
E-GEOD-16615_46_1_2_mod.txt	ArrayExpress	E-GEOD-16615	1.17885218527	Homo sapiens	gene expression in human subcutaneous adipose tissue after CLA intervention	FactorValue..SUBJECT.	1	2
E-GEOD-25098_32_3_7_mod.txt	ArrayExpress	E-GEOD-25098	-8.12862542939	Mus musculus	Rhabdomyosarcoma can be initiated in activated Pax7+ Muscle Progenitor Cells	FactorValue..GENOTYPE.VARIATION.	Pax7-CreER/+; LSL-KrasG12D;Trp53Flox/Flox	Wild Type mice
GDS2736_disease.state_1_9_mod.txt	GEO	GDS2736	-2.98215405441	Homo sapiens	Malignant fibrous histiocytoma and various soft tissue sarcomas	disease.state	dedifferentiated liposarcoma	synovial sarcoma
GDS3233_disease.state_2_3_mod.txt	GEO	GDS3233	-4.04439017959	Homo sapiens	Cervical cancer tumorigenesis	disease.state	cervical cancer primary tumor	normal
E-GEOD-33892_48_2_3_mod.txt	ArrayExpress	E-GEOD-33892	-1.47419370836	Homo sapiens	Comparison of TEX and M9-ENL1 cell lines to HL60 and THP1 cell lines	FactorValue..CELL.LINE.	M9-ENL1	TEX
E-GEOD-24705_38_2_10_mod.txt	ArrayExpress	E-GEOD-24705	-2.66182366873	Mus musculus	mRNA expression data from iPSCs	FactorValue..CELL.LINE.	iPS cell line iPSM1_6	ntiPS cell line ntiPSM2_3_3
E-GEOD-27546_37_1_3_mod.txt	ArrayExpress	E-GEOD-27546	1.60747721031	Mus musculus	Effects of HMGN variants on cellular transcription profile	FactorValue..CELL.TYPE.	MIN6 cells	SV40 transformed MEFs
E-GEOD-11259_34_2_3_mod.txt	ArrayExpress	E-GEOD-11259	2.70089185302	Mus musculus	Transcription profiling of mouse BALB/c strain animals injected with breast cancer 4T1-derived cells to investigate the role of epithelial to mesenchymal transition (EMT) in spontaneous breast cancer metastasis	Factor.Value..CELLLINE.	66cl4	67NR
E-GEOD-21761_63_2_3_mod.txt	ArrayExpress	E-GEOD-21761	2.80606358966	Mus musculus	A large intergenic non-coding RNA induced by p53 mediates global gene repression in the p53 transcriptional response	FactorValue..AGENT.	doxorubicin	not specified
GDS1490_tissue_3_25_mod.txt	GEO	GDS1490	1.23859207397	Mus musculus	Neural tissue profiling	tissue	bed nucleus stria terminalis	pons
GDS3142_tissue_6_20_mod.txt	GEO	GDS3142	-1.08250680808	Mus musculus	Various tissues	tissue	embryonic stem cells	spleen
E-GEOD-13873_35_3_4_mod.txt	ArrayExpress	E-GEOD-13873	3.70986414666	Mus musculus	Expression data from murine gastric epithelium	FactorValue..PATHOLOGY.	metaplasia	n/a
GDS1265_development.stage_1_3_mod.txt	GEO	GDS1265	1.47548449672	Mus musculus	Oocyte development (MOE430A)	development.stage	large antral follicle	primordial follicle
GDS2472_agent_1_2_mod.txt	GEO	GDS2472	-1.40521073805	Rattus norvegicus	Glucosamine and interleukin-1 beta effect on chondrocytes	agent	control	glucosamine
GDS3113_tissue_19_29_mod.txt	GEO	GDS3113	2.51540068448	Homo sapiens	Various normal tissues	tissue	retina	tonsil
E-TABM-1091_29_1_6_mod.txt	ArrayExpress	E-TABM-1091	2.97987363093	Homo sapiens	Transcriptiion profiling by array of human ratiometric mixes of high quality RNA from different tissues using different labeling protocols to provide a mechanism for assessing process improvement	Factor.Value..MIX.	Human Brain Reference RNA	Universal Human Reference RNA
E-TABM-1091_30_1_4_mod.txt	ArrayExpress	E-TABM-1091	-1.60783848201	Homo sapiens	Transcriptiion profiling by array of human ratiometric mixes of high quality RNA from different tissues using different labeling protocols to provide a mechanism for assessing process improvement	Factor.Value..INPUT_RNA.	0.02 micrograms	5.0 micrograms
E-GEOD-23583_50_1_6_mod.txt	ArrayExpress	E-GEOD-23583	-3.40002473567	Homo sapiens	Highly efficient reprogramming to pluripotency and directed differentiation using synthetic mRNA	FactorValue..CELL.TYPE.	BJ fibroblast	iPS cells derived from dH1F fibroblast
GDS2819_individual_2_18_mod.txt	GEO	GDS2819	5.73132933593	Homo sapiens	Leukemic white blood cells and various RNA preparation protocols	individual	patient 10	patient 25
E-GEOD-17549_40_1_2_mod.txt	ArrayExpress	E-GEOD-17549	-2.97474694976	Homo sapiens	Transcription profiling by array of human fibroblasts and monocytes from patients with choroideremia	FactorValue.cell.type.	fibroblast	monocyte
E-GEOD-22798_35_1_4_mod.txt	ArrayExpress	E-GEOD-22798	8.91135804074	Mus musculus	Expression data from Pax7+ satellite cell derived tumors in vitro and in vivo	FactorValue..GENOTYPE.	littermate control	R26-Cre-ERT2;LSL-KrasG12D/+;Trp53Fl/Fl
E-GEOD-29986_31_1_2_mod.txt	ArrayExpress	E-GEOD-29986	-2.29230063079	Homo sapiens	gene expression analyses of pediatric lymphoblastic lymphomas and leukemias	FactorValue..DIAGNOSIS.	common lymphoblastic leukemia bone marrow	lymphoblastic tumor biopsy
E-GEOD-27987_35_6_7_mod.txt	ArrayExpress	E-GEOD-27987	-1.31082047483	Mus musculus	Differential pre-mRNA processing in Crebbp+/- mice	FactorValue..CELL.TYPE.	Crebbp+/+ MEF	Ep300+/- FLHSC
E-GEOD-21902_33_1_2_mod.txt	ArrayExpress	E-GEOD-21902	-1.1097228191	Mus musculus	Expression Data from chemical induced tumors obtained from NDR1+/+	Factor.Value..TREATMENT.	N-ethyl-N-nitrosourea (ENU) 100mg/kg	none
GDS3113_tissue_5_13_mod.txt	GEO	GDS3113	3.14680932304	Homo sapiens	Various normal tissues	tissue	fetal brain	mammary gland
GDS3113_tissue_13_23_mod.txt	GEO	GDS3113	-1.55946595187	Homo sapiens	Various normal tissues	tissue	mammary gland	small intestine
GDS2819_individual_12_18_mod.txt	GEO	GDS2819	2.3190757329	Homo sapiens	Leukemic white blood cells and various RNA preparation protocols	individual	patient 2	patient 25
E-TABM-672_24_7_9_mod.txt	ArrayExpress	E-TABM-672	1.2589623622	Mus musculus	Transcription profiling of mouse embyronic stem cell line CGR8 during the first 10 days of differentiation into embryoid bodies	Factor.Value..Age.	6	10
E-GEOD-24547_44_1_4_mod.txt	ArrayExpress	E-GEOD-24547	-2.71534649588	Homo sapiens	Transcriptional pathway signatures for the Aurora inhibitor Danusertib	FactorValue..CELL.LINE.	A2780	MCF7
E-GEOD-13873_34_2_3_mod.txt	ArrayExpress	E-GEOD-13873	-3.63510229014	Mus musculus	Expression data from murine gastric epithelium	FactorValue..INFECTION.	n/a	uninfected
E-GEOD-26290_48_1_3_mod.txt	ArrayExpress	E-GEOD-26290	-1.72453181633	Mus musculus	Expression data from control and Phospholipid dependent kinase 1 (PDK1) null cytotoxic T-lymphocytes (CTL) and from control and Akt inhibitor treated CTL	FactorValue..AGENT.	Akt inhibitor AktI-1/2	not specified
E-GEOD-24705_38_6_10_mod.txt	ArrayExpress	E-GEOD-24705	-1.0231308053	Mus musculus	mRNA expression data from iPSCs	FactorValue..CELL.LINE.	ntES cells cell line NTM1_7	ntiPS cell line ntiPSM2_3_3
GDS2819_individual_18_27_mod.txt	GEO	GDS2819	-2.22135390655	Homo sapiens	Leukemic white blood cells and various RNA preparation protocols	individual	patient 25	patient 9
E-GEOD-24637_42_1_4_mod.txt	ArrayExpress	E-GEOD-24637	1.24764386831	Mus musculus	Genetic and genomic analysis of hyperlipidemia	FactorValue..TISSUE.	Adipose	pancreas
GDS3113_tissue_1_21_mod.txt	GEO	GDS3113	-1.88445504078	Homo sapiens	Various normal tissues	tissue	adrenal gland	skeletal muscle
E-GEOD-24705_38_5_11_mod.txt	ArrayExpress	E-GEOD-24705	-1.65211065732	Mus musculus	mRNA expression data from iPSCs	FactorValue..CELL.LINE.	iPS cell line iPSM2_4	ntiPS cell line ntiPSM2_4_3
E-GEOD-27546_37_1_2_mod.txt	ArrayExpress	E-GEOD-27546	1.42076675822	Mus musculus	Effects of HMGN variants on cellular transcription profile	FactorValue..CELL.TYPE.	MIN6 cells	primary MEFs
E-TABM-1091_29_4_6_mod.txt	ArrayExpress	E-TABM-1091	1.79484520206	Homo sapiens	Transcriptiion profiling by array of human ratiometric mixes of high quality RNA from different tissues using different labeling protocols to provide a mechanism for assessing process improvement	Factor.Value..MIX.	Mix2	Universal Human Reference RNA
E-GEOD-27987_35_5_6_mod.txt	ArrayExpress	E-GEOD-27987	1.23637530263	Mus musculus	Differential pre-mRNA processing in Crebbp+/- mice	FactorValue..CELL.TYPE.	Crebbp+/+ FLHSC	Crebbp+/+ MEF
E-GEOD-24547_44_1_5_mod.txt	ArrayExpress	E-GEOD-24547	2.69105062657	Homo sapiens	Transcriptional pathway signatures for the Aurora inhibitor Danusertib	FactorValue..CELL.LINE.	A2780	MDA-MB-468
E-GEOD-37907_32_1_2_mod.txt	ArrayExpress	E-GEOD-37907	3.06834937376	Mus musculus	Expression data from murine hematopoietic cells expressing BCR-ABL alone	FactorValue..ONCOGENES.	BCR-ABL-/NUP98-HOXA9-	BCR-ABL+
E-GEOD-24207_47_8_10_mod.txt	ArrayExpress	E-GEOD-24207	-3.92259329094	Mus musculus	mRNA analysis in different mouse tissues	FactorValue..TISSUE.	insulinoma	liver
GDS2718_cell.type_1_2_mod.txt	GEO	GDS2718	-3.43761602636	Mus musculus	Transcription factor Zfx deficiency effect on embryonic and hematopoietic stem cells	cell.type	embryonic stem cell	hematopoietic stem cell
GDS1479_specimen_2_5_mod.txt	GEO	GDS1479	-1.0827446631	Homo sapiens	Carcinoma in situ lesions of the urinary bladder	specimen	muscle invasive carcinoma	superficial transitional cell carcinoma w/o surrounding carcinoma in situ (CIS) lesion
E-MEXP-3034_26_2_3_mod.txt	ArrayExpress	E-MEXP-3034	-1.04795558957	Homo sapiens	Transcription profiling by array of human preplasmablast cells in the process of differentiation of human B cells to plasma cells	Factor.Value.CELL_TYPE.	CD20- preplasmablasts	FCRL4 B cells
E-GEOD-19732_23_2_7_mod.txt	ArrayExpress	E-GEOD-19732	1.23146362607	Mus musculus	Identification of genes characteristic of committed preadipocyte fibroblasts	Factor.Value..CELL.LINE.	Swiss2	Swiss9
GDS3113_tissue_5_26_mod.txt	GEO	GDS3113	2.92616784587	Homo sapiens	Various normal tissues	tissue	fetal brain	testis
E-GEOD-24705_38_5_8_mod.txt	ArrayExpress	E-GEOD-24705	-1.79538905093	Mus musculus	mRNA expression data from iPSCs	FactorValue..CELL.LINE.	iPS cell line iPSM2_4	ntiPS cell line ntiPSM1_6_5
GDS1681_time_1_3_mod.txt	GEO	GDS1681	2.23690251474	Homo sapiens	Dendritic cell response to measles virus infection: time course	time	0 h	24 h
GDS3113_tissue_1_9_mod.txt	GEO	GDS3113	-1.94944203034	Homo sapiens	Various normal tissues	tissue	adrenal gland	heart
GDS3113_tissue_2_19_mod.txt	GEO	GDS3113	-1.2340629555	Homo sapiens	Various normal tissues	tissue	bone marrow	retina
GDS1663_tissue_1_4_mod.txt	GEO	GDS1663	1.37583267814	Homo sapiens	Expression data from different research centers	tissue	kidney	universal RNA
GDS3113_tissue_2_31_mod.txt	GEO	GDS3113	3.28875136882	Homo sapiens	Various normal tissues	tissue	bone marrow	Universal Human Reference RNA
E-GEOD-22798_35_1_3_mod.txt	ArrayExpress	E-GEOD-22798	9.12724408956	Mus musculus	Expression data from Pax7+ satellite cell derived tumors in vitro and in vivo	FactorValue..GENOTYPE.	littermate control	Pax7CE/+;LSL-KrasG12D/+;Trp53Fl/Fl
GDS1490_tissue_19_24_mod.txt	GEO	GDS1490	1.21143837433	Mus musculus	Neural tissue profiling	tissue	midbrain and diencephalon	pituitary
GDS1490_tissue_25_34_mod.txt	GEO	GDS1490	-1.76095225939	Mus musculus	Neural tissue profiling	tissue	pons	white adipose tissue
GDS3113_tissue_3_6_mod.txt	GEO	GDS3113	-1.7372428828	Homo sapiens	Various normal tissues	tissue	brain	fetal kidney
E-GEOD-34126_41_1_3_mod.txt	ArrayExpress	E-GEOD-34126	5.56727866508	Mus musculus	An Animal Model of Myc-driven medulloblastoma	FactorValue..CELL.SOURCE.	normal (uninfected) cerebellar stem cells	progenitor-derived tumors
E-GEOD-24705_38_2_8_mod.txt	ArrayExpress	E-GEOD-24705	-2.69095863283	Mus musculus	mRNA expression data from iPSCs	FactorValue..CELL.LINE.	iPS cell line iPSM1_6	ntiPS cell line ntiPSM1_6_5
E-GEOD-12198_26_2_4_mod.txt	ArrayExpress	E-GEOD-12198	-2.36862433823	Homo sapiens	Transcription profiling by array of human natural killer cells	FactorValue.TREATMENT.	low dose IL2	none
GDS1375_disease.state_2_3_mod.txt	GEO	GDS1375	-2.06041701242	Homo sapiens	Cutaneous malignant melanoma	disease.state	malignant melanoma	normal
GDS3516_disease.state_4_9_mod.txt	GEO	GDS3516	-1.19139870684	Homo sapiens	Nodular lymphocyte-predominant Hodgkin lymphoma: lymphocytic and histiocytic cells	disease.state	follicular lymphoma	normal naive B-cells
GDS1490_tissue_3_18_mod.txt	GEO	GDS1490	1.40919491179	Mus musculus	Neural tissue profiling	tissue	bed nucleus stria terminalis	medulla oblongata
GDS3113_tissue_1_24_mod.txt	GEO	GDS3113	-1.64535082565	Homo sapiens	Various normal tissues	tissue	adrenal gland	spinal cord
GDS3113_tissue_6_26_mod.txt	GEO	GDS3113	2.57644176614	Homo sapiens	Various normal tissues	tissue	fetal kidney	testis
E-GEOD-16615_46_2_3_mod.txt	ArrayExpress	E-GEOD-16615	-1.56881578045	Homo sapiens	gene expression in human subcutaneous adipose tissue after CLA intervention	FactorValue..SUBJECT.	2	3
GDS3142_tissue_6_10_mod.txt	GEO	GDS3142	-1.08475469334	Mus musculus	Various tissues	tissue	embryonic stem cells	kidney
GDS2295_protocol_1_2_mod.txt	GEO	GDS2295	-2.03747296858	Homo sapiens	Aplidin and cytarabine effect on diffuse large B cell lymphoma cell line	protocol	in vitro	in vivo
E-GEOD-23583_51_2_3_mod.txt	ArrayExpress	E-GEOD-23583	-2.16498362367	Homo sapiens	Highly efficient reprogramming to pluripotency and directed differentiation using synthetic mRNA	FactorValue..REPROGRAMMING.PROTOCOL.	n/a	RNA derived iPS
E-GEOD-34907_29_2_3_mod.txt	ArrayExpress	E-GEOD-34907	4.15103833345	Mus musculus	Genetic and epigenetic determinants of neurogenesis and myogenesis [expression profiling]	FactorValue..CELL.TYPE.	Neuronally differentiated P19 cells	undifferentiated MEF cells
E-TABM-1091_32_2_5_mod.txt	ArrayExpress	E-TABM-1091	-2.38752189752	Homo sapiens	Transcriptiion profiling by array of human ratiometric mixes of high quality RNA from different tissues using different labeling protocols to provide a mechanism for assessing process improvement	Factor.Value..BATCH.	Batch2	Batch5
GDS3113_tissue_19_30_mod.txt	GEO	GDS3113	1.71163131026	Homo sapiens	Various normal tissues	tissue	retina	trachea
GDS2819_individual_10_20_mod.txt	GEO	GDS2819	4.78986931693	Homo sapiens	Leukemic white blood cells and various RNA preparation protocols	individual	patient 18	patient 27
GDS2819_individual_11_22_mod.txt	GEO	GDS2819	2.92417454786	Homo sapiens	Leukemic white blood cells and various RNA preparation protocols	individual	patient 19	patient 4
E-GEOD-21444_35_1_2_mod.txt	ArrayExpress	E-GEOD-21444	3.30850484804	Mus musculus	Expression profiling of murine DCIS and invasive ductal breast carcinoma	FactorValue..TISSUE.	breast	breast tumor
E-GEOD-18269_56_2_3_mod.txt	ArrayExpress	E-GEOD-18269	3.3313313384	Homo sapiens	HepaRG cells as a model of the primary human hepatocyte transcriptome	FactorValue..DIFFERENTIATION.STATE.	not specified	undifferentiated
E-GEOD-24207_47_21_22_mod.txt	ArrayExpress	E-GEOD-24207	1.00161378563	Mus musculus	mRNA analysis in different mouse tissues	FactorValue..TISSUE.	spleen	testis
GDS3516_disease.state_5_9_mod.txt	GEO	GDS3516	-1.65967976196	Homo sapiens	Nodular lymphocyte-predominant Hodgkin lymphoma: lymphocytic and histiocytic cells	disease.state	nodular lymphocyte-predominant Hodgkin lymphoma	normal naive B-cells
GDS2819_individual_17_18_mod.txt	GEO	GDS2819	1.36701521247	Homo sapiens	Leukemic white blood cells and various RNA preparation protocols	individual	patient 24	patient 25
GDS3113_tissue_1_28_mod.txt	GEO	GDS3113	-4.19526751353	Homo sapiens	Various normal tissues	tissue	adrenal gland	thyroid
GDS3113_tissue_9_26_mod.txt	GEO	GDS3113	1.46696968151	Homo sapiens	Various normal tissues	tissue	heart	testis
E-TABM-1091_32_4_5_mod.txt	ArrayExpress	E-TABM-1091	-2.14304870233	Homo sapiens	Transcriptiion profiling by array of human ratiometric mixes of high quality RNA from different tissues using different labeling protocols to provide a mechanism for assessing process improvement	Factor.Value..BATCH.	Batch4	Batch5
GDS3113_tissue_1_7_mod.txt	GEO	GDS3113	-4.18351746089	Homo sapiens	Various normal tissues	tissue	adrenal gland	fetal liver
E-GEOD-24207_47_13_14_mod.txt	ArrayExpress	E-GEOD-24207	1.66197302256	Mus musculus	mRNA analysis in different mouse tissues	FactorValue..TISSUE.	ovary	pancreatic acini
E-GEOD-20089_24_1_2_mod.txt	ArrayExpress	E-GEOD-20089	-5.78066735603	Homo sapiens	Pseudopod Experiment	Factor.Value..CELL.LINE.	DU145	HT1080
E-MEXP-2700_27_1_2_mod.txt	ArrayExpress	E-MEXP-2700	-1.04641201512	Homo sapiens	Investigating gradients of gene expression involved in early human cortical development	Factor.Value.AGE.	8	9
E-GEOD-24705_38_4_7_mod.txt	ArrayExpress	E-GEOD-24705	-1.40053735442	Mus musculus	mRNA expression data from iPSCs	FactorValue..CELL.LINE.	iPS cell line iPSM2_3	ntES cells cell line NTM2_4
GDS2819_individual_11_25_mod.txt	GEO	GDS2819	3.71743201066	Homo sapiens	Leukemic white blood cells and various RNA preparation protocols	individual	patient 19	patient 7
E-GEOD-34482_30_1_2_mod.txt	ArrayExpress	E-GEOD-34482	-7.12778639017	Homo sapiens	Expression data from transfection of SW1783 and U87 glioma cells with miR-376a* for 24 and 72 hours	FactorValue..CELL.LINE.	SW1783 human glioma cells	U87 glioma cells
E-GEOD-18322_27_1_4_mod.txt	ArrayExpress	E-GEOD-18322	-1.11062642964	Mus musculus	Gene Expression Analysis of Ara-C Resistance in AML	Factor.Value..CELL.LINE.	B117H	B140P
GDS2237_time_1_3_mod.txt	GEO	GDS2237	-6.92370788974	Rattus norvegicus	Liver response to skin burn: time course	time	1 d	4 d
E-GEOD-31324_57_3_6_mod.txt	ArrayExpress	E-GEOD-31324	-1.66034727155	Homo sapiens	Expression data of freshly microdissected human hair follicle dermal papilla and its comparisons	FactorValue..TREATMENT.	dermal papilla cultured	dermal papilla freshly-microdissected
GDS3113_tissue_2_28_mod.txt	GEO	GDS3113	-2.44137570453	Homo sapiens	Various normal tissues	tissue	bone marrow	thyroid
GDS1490_tissue_1_28_mod.txt	GEO	GDS1490	1.28526629027	Mus musculus	Neural tissue profiling	tissue	adrenal	spinal cord
GDS1663_other_1_2_mod.txt	GEO	GDS1663	-1.3680025202	Homo sapiens	Expression data from different research centers	other	Children's National Medical Center in Washington, DC	Translational Genomics Research Institute
GDS1063_cell.type_1_2_mod.txt	GEO	GDS1063	2.3436034533	Homo sapiens	Primary effusion lymphomas and associated viral infections	cell.type	cell line	mononuclear cell
E-GEOD-33199_29_2_7_mod.txt	ArrayExpress	E-GEOD-33199	-3.95045035123	Mus musculus	A mouse model of the most aggressive subgroup of human medulloblastoma [Mouse430 2]	FactorValue..VARIATION.	cmyc MB - GFP negative	p53-/-, Cdkn2c-/-, Math1-GFP FACS sort for GFP+
E-GEOD-25488_40_3_4_mod.txt	ArrayExpress	E-GEOD-25488	2.15611089913	Mus musculus	Expression data from C3(1)Tag mammary tumors	FactorValue..GENOTYPE.	Her2/Neu	not specified
E-GEOD-24705_38_5_10_mod.txt	ArrayExpress	E-GEOD-24705	-1.76625408683	Mus musculus	mRNA expression data from iPSCs	FactorValue..CELL.LINE.	iPS cell line iPSM2_4	ntiPS cell line ntiPSM2_3_3
GDS1490_tissue_2_18_mod.txt	GEO	GDS1490	1.10903105947	Mus musculus	Neural tissue profiling	tissue	amygdala	medulla oblongata
GDS1962_disease.state_2_3_mod.txt	GEO	GDS1962	-1.11955425946	Homo sapiens	Glioma-derived stem cell factor effect on angiogenesis in the brain	disease.state	glioblastomas	non-tumor
E-GEOD-8023_33_1_2_mod.txt	ArrayExpress	E-GEOD-8023	-2.37926683232	Homo sapiens	Transcription profiling of human AML1-ETO transduced cord blood cells, CD34 selected, compared to normal cord blood cells, CD34 selected	Factor.Value.genetic.modification.	AML1-ETO fusion gene	control
E-MEXP-3628_23_1_2_mod.txt	ArrayExpress	E-MEXP-3628	3.93021133131	Homo sapiens	Transcriptional profiling by array of human bone specimens to study miRNA signatures associated with pathogenesis and progression of osteosarcoma	Factor.Value.DISEASE_STATE.	normal	osteosarcoma
E-GEOD-27220_39_1_2_mod.txt	ArrayExpress	E-GEOD-27220	-2.48277389058	Homo sapiens	Transcriptional effects of 1,25 dihydroxi-vitamin D3 physiological and supra-physiological concentrations in breast cancer organotypic culture	FactorValue..CLINICAL.STAGE.		II
E-GEOD-21761_68_1_2_mod.txt	ArrayExpress	E-GEOD-21761	-2.22756958811	Mus musculus	A large intergenic non-coding RNA induced by p53 mediates global gene repression in the p53 transcriptional response	FactorValue..TRANSFECTION.	AdenoCRE	AdenoGFP (control)
GDS3113_tissue_1_16_mod.txt	GEO	GDS3113	-1.83217292177	Homo sapiens	Various normal tissues	tissue	adrenal gland	peripheral blood lymphocyte
E-GEOD-12548_28_3_4_mod.txt	ArrayExpress	E-GEOD-12548	-1.28920011277	Homo sapiens	Transcription profiling by array of a human retinal pigment epithelium cell line after treatment with tumor necrosis factor and tumor growth factor	Factor.Value.time.	16	24
GDS3516_disease.state_1_9_mod.txt	GEO	GDS3516	-1.31157571655	Homo sapiens	Nodular lymphocyte-predominant Hodgkin lymphoma: lymphocytic and histiocytic cells	disease.state	Burkitt lymphoma	normal naive B-cells
GDS2819_individual_11_16_mod.txt	GEO	GDS2819	2.77958639927	Homo sapiens	Leukemic white blood cells and various RNA preparation protocols	individual	patient 19	patient 23
GDS3113_tissue_7_12_mod.txt	GEO	GDS3113	2.72762541819	Homo sapiens	Various normal tissues	tissue	fetal liver	lung
GDS3113_tissue_30_31_mod.txt	GEO	GDS3113	2.81118301407	Homo sapiens	Various normal tissues	tissue	trachea	Universal Human Reference RNA
GDS1956_disease.state_2_10_mod.txt	GEO	GDS1956	1.01124346191	Homo sapiens	Various muscle diseases (HG-U133A)	disease.state	amyotophic lateral sclerosis	juvenile dermatomyositis
E-GEOD-21247_58_1_2_mod.txt	ArrayExpress	E-GEOD-21247	2.79204090982	Mus musculus	Network Analysis of Skin Tumor Progression Identifies a Rewired Genetic Architecture Affecting Inflammation and Tumor Susceptibility (carcinomas)	FactorValue..TUMOR_CLASS.	1	2
E-GEOD-24705_39_2_3_mod.txt	ArrayExpress	E-GEOD-24705	-1.3048472373	Mus musculus	mRNA expression data from iPSCs	FactorValue..CELL.TYPE.	induced pluripotent stem cells	nuclear transfer ES cells
E-GEOD-37907_32_1_3_mod.txt	ArrayExpress	E-GEOD-37907	2.44594155317	Mus musculus	Expression data from murine hematopoietic cells expressing BCR-ABL alone	FactorValue..ONCOGENES.	BCR-ABL-/NUP98-HOXA9-	BCR-ABL+/NUP98-HOXA9+
GDS988_cell.line_2_3_mod.txt	GEO	GDS988	-5.11213197084	Homo sapiens	Kaposi's sarcoma-associated herpesvirus LANA overexpression in B lymphoid cells: time course	cell.line	BJAB	Jurkat
E-GEOD-26408_38_1_4_mod.txt	ArrayExpress	E-GEOD-26408	3.87631737431	Mus musculus	Signatures of murine B-cell development implicate Yy1 as a regulator of the germinal center-specific program	FactorValue..STRAIN.OR.LINE.	129	Lig4/P53 KO (Frank et al., Mol. Cell 2000;5:993-1002)
E-GEOD-32408_30_1_2_mod.txt	ArrayExpress	E-GEOD-32408	1.2700632861	Homo sapiens	Expression data from TOP-GFP sorted colon cancer cells	FactorValue..ORGANISM.PART.	Tumor tissue grown from cultured colon cancer cell line	Tumor tissue grown from patient dervived colon cancer specimen
GDS3113_tissue_7_26_mod.txt	GEO	GDS3113	3.70104511206	Homo sapiens	Various normal tissues	tissue	fetal liver	testis
GDS1027_time_1_2_mod.txt	GEO	GDS1027	-1.02337300538	Rattus norvegicus	Sulfur mustard effect on lungs: dose response and time course	time	0.5 h	1 h
E-GEOD-18660_39_1_2_mod.txt	ArrayExpress	E-GEOD-18660	-4.06366631921	Mus musculus	Modulation of calcium activated potassium channels induces cardiogenesis of pluripotent stem cells and enrichment of pacemaker- like cells	FactorValue..CELL.TYPE.	differentiated embryonic stem cell (ES cells)	embryonic stem cell (ES cells)
E-MEXP-3216_31_1_2_mod.txt	ArrayExpress	E-MEXP-3216	1.90898283012	Mus musculus	Transcription profiling by array of mouse wild type and p16ink4a deficient bone marrow cells differentiated with normal LCM-supplemented differentiation medium or supplemented with Interleukin 4 during differeniation	Factor.Value.DOSE.	0	15
E-GEOD-24705_38_4_8_mod.txt	ArrayExpress	E-GEOD-24705	-2.73315630172	Mus musculus	mRNA expression data from iPSCs	FactorValue..CELL.LINE.	iPS cell line iPSM2_3	ntiPS cell line ntiPSM1_6_5
GDS1490_tissue_1_24_mod.txt	GEO	GDS1490	1.31577703637	Mus musculus	Neural tissue profiling	tissue	adrenal	pituitary
E-MEXP-563_32_2_6_mod.txt	ArrayExpress	E-MEXP-563	-3.48513781841	Homo sapiens	Transcription profiling of human mesenchymal stem cells transformed with lentiviral vectors of TERT, E6, SV40 and RAS	Factor.Value..transfect.	hTERT/HPVE6	wild_type
E-GEOD-25488_40_3_6_mod.txt	ArrayExpress	E-GEOD-25488	2.19644657452	Mus musculus	Expression data from C3(1)Tag mammary tumors	FactorValue..GENOTYPE.	Her2/Neu	p53 KO ER pos
E-GEOD-12548_28_3_5_mod.txt	ArrayExpress	E-GEOD-12548	-1.04909802764	Homo sapiens	Transcription profiling by array of a human retinal pigment epithelium cell line after treatment with tumor necrosis factor and tumor growth factor	Factor.Value.time.	16	42
E-GEOD-29437_47_1_3_mod.txt	ArrayExpress	E-GEOD-29437	-3.83831272004	Homo sapiens	Progesterone inhibits epithelial-to-mesenchymal transition in endometrial cancer	FactorValue..TREAMENT.	1 nM medroxyprogesterone acetate (MPA)	not specified
E-GEOD-19732_23_6_7_mod.txt	ArrayExpress	E-GEOD-19732	1.05431691585	Mus musculus	Identification of genes characteristic of committed preadipocyte fibroblasts	Factor.Value..CELL.LINE.	Swiss8	Swiss9
E-GEOD-27987_35_4_7_mod.txt	ArrayExpress	E-GEOD-27987	-1.47727263762	Mus musculus	Differential pre-mRNA processing in Crebbp+/- mice	FactorValue..CELL.TYPE.	Crebbp+/- MEF	Ep300+/- FLHSC
E-TABM-1118_26_1_2_mod.txt	ArrayExpress	E-TABM-1118	3.48652246346	Homo sapiens	Transcrption profiling by array of human breast cancer cells treated with LPS-Stimulated macrophage conditioned media	Factor.Value..CELLLINE.	MDA-MB-231	T47D
E-MEXP-2170_22_1_2_mod.txt	ArrayExpress	E-MEXP-2170	-4.83405471161	Homo sapiens	Transcription profiling by array of human acute myeloid leukemia cells after treatment with rapamycin	Factor.Value..cell.line.	MV4-11	THP-1
GDS3113_tissue_22_29_mod.txt	GEO	GDS3113	2.17867758246	Homo sapiens	Various normal tissues	tissue	skin	tonsil
E-GEOD-33688_33_1_3_mod.txt	ArrayExpress	E-GEOD-33688	-1.64270109509	Mus musculus	Genome-wide analyses reveal the extent of opportunistic STAT5 binding that does not yield transcriptional activation of neighboring genes	FactorValue..VARATION.	KO	WT
E-MEXP-1273_30_1_4_mod.txt	ArrayExpress	E-MEXP-1273	1.21550081751	Homo sapiens	Transcription profiling of human mesenchymal stem cells from adipose tissue grown in normal media in monolayer or with LVG or RGD alignate	Factor.Value..growth.condition.	freshly isolated	RGD alginate culture
GDS3113_tissue_16_29_mod.txt	GEO	GDS3113	1.35961884174	Homo sapiens	Various normal tissues	tissue	peripheral blood lymphocyte	tonsil
E-GEOD-35959_47_1_2_mod.txt	ArrayExpress	E-GEOD-35959	-1.92490904915	Homo sapiens	Effects of aging, primary osteoporosis, and cellular senescence on Human Mesenchymal Stem Cells	FactorValue..PASSAGE.	long term-cultivation (cellular senescence state)	passage 1
GDS2545_tissue_1_3_mod.txt	GEO	GDS2545	-2.11854347037	Homo sapiens	Metastatic prostate cancer (HG-U95A)	tissue	metastatic prostate tumor	normal prostate tissue
E-GEOD-20667_35_1_3_mod.txt	ArrayExpress	E-GEOD-20667	-5.63260780612	Homo sapiens	The Notch/Hes1 pathway sustains NF-B activation through CYLD repression in T cell leukemia	FactorValue..CELL.LINE.	ACC483 [HPB-ALL]	JCRB0033 [CEM]
E-GEOD-16249_44_1_2_mod.txt	ArrayExpress	E-GEOD-16249	3.00613455026	Homo sapiens	siRNA-mediated knockdown of MITF and PAX3 in metastatic melanoma cell lines	FactorValue..CELL.LINE.	NZM12	NZM15
E-GEOD-34126_43_2_3_mod.txt	ArrayExpress	E-GEOD-34126	2.79973315937	Mus musculus	An Animal Model of Myc-driven medulloblastoma	FactorValue..GENOTYPE.VARIATION.	Ptch1 mutant	tumor-bearing mice
E-GEOD-21761_63_1_2_mod.txt	ArrayExpress	E-GEOD-21761	-3.52959621163	Mus musculus	A large intergenic non-coding RNA induced by p53 mediates global gene repression in the p53 transcriptional response	FactorValue..AGENT.	4-hydroxytamoxifen	doxorubicin
E-GEOD-32386_33_1_2_mod.txt	ArrayExpress	E-GEOD-32386	3.83451567014	Mus musculus	Expression profiling of murine neuroblastoma in transgenic mice	FactorValue..GENOTYPE.	not specified	transgenic for neural crest-specific expression of mutated ALK
GDS3142_tissue_6_14_mod.txt	GEO	GDS3142	-1.07333488936	Mus musculus	Various tissues	tissue	embryonic stem cells	ovary
E-GEOD-24628_23_1_3_mod.txt	ArrayExpress	E-GEOD-24628	-2.66182580666	Mus musculus	Subtypes of medulloblastoma have distinct developmental origins	Factor.Value..GENOTYPE.VARIATION.	BlbpCre; Ctnnb1(FlxEx3/+); Tp53 (Flx/Flx)	wildtype
E-GEOD-30747_50_2_4_mod.txt	ArrayExpress	E-GEOD-30747	1.54774653778	Mus musculus	AML mouse models	FactorValue..TRANSGENE.	inducible MLL-AF9;KrasG12D	not specified
E-GEOD-29848_38_3_4_mod.txt	ArrayExpress	E-GEOD-29848	1.44405537665	Mus musculus	Microarray data of differentiating embryonic stem cells overexpressing the transcription factor Msgn1	FactorValue..TREATMENT.	Day2 EBs cultured for another 48h	Day2 EBs induced with doxycycline and cultured for another 12h
E-GEOD-21761_68_1_3_mod.txt	ArrayExpress	E-GEOD-21761	1.34687965398	Mus musculus	A large intergenic non-coding RNA induced by p53 mediates global gene repression in the p53 transcriptional response	FactorValue..TRANSFECTION.	AdenoCRE	not specified
GDS3113_tissue_31_32_mod.txt	GEO	GDS3113	-4.13034460569	Homo sapiens	Various normal tissues	tissue	Universal Human Reference RNA	uterus
GDS1406_tissue_2_7_mod.txt	GEO	GDS1406	1.10152667806	Mus musculus	Brain regions of various inbred strains	tissue	bed nucleus of the stria terminalis	pituitary gland
E-GEOD-24813_42_1_2_mod.txt	ArrayExpress	E-GEOD-24813	1.57532861283	Mus musculus	Gene expression data of BCR-ABL1 transformed myeloid cells from BCL6 wild-type and BCL6 knockout mice treated with and without Imatinib and RI-BPI	FactorValue..GENOTYPE.VARIATION.	BCL6 KO	BCL6 WT
E-GEOD-33549_39_2_8_mod.txt	ArrayExpress	E-GEOD-33549	3.07181269777	Mus musculus	Expression data from mouse T-cell lymphomas	FactorValue..GENOTYPE.VARIATION.	Cdkn2a knock out- Retroviral insertional mutagenesis	p53 knock out
E-GEOD-34126_42_1_4_mod.txt	ArrayExpress	E-GEOD-34126	2.5987560426	Mus musculus	An Animal Model of Myc-driven medulloblastoma	FactorValue..CELL.TYPE.	FACS-sorted Prominin1+, Lineage-negative (Lin) cells	not specified
GDS2819_individual_3_19_mod.txt	GEO	GDS2819	-2.1961226876	Homo sapiens	Leukemic white blood cells and various RNA preparation protocols	individual	patient 11	patient 26
GDS3012_disease.state_1_2_mod.txt	GEO	GDS3012	2.43261723559	Homo sapiens	DNA methylation inhibitor effect on melanoma cell lines	disease.state	melanoma	normal
E-GEOD-20272_23_1_2_mod.txt	ArrayExpress	E-GEOD-20272	-6.22050831809	Homo sapiens	Expression data from human ovarian cancer cells induced by IL-6 and CNTO328	Factor.Value..CELL.LINE.	Caov-3	SKOV-3
GDS2819_individual_18_24_mod.txt	GEO	GDS2819	-1.82732223699	Homo sapiens	Leukemic white blood cells and various RNA preparation protocols	individual	patient 25	patient 6
E-GEOD-29045_30_2_3_mod.txt	ArrayExpress	E-GEOD-29045	-1.11792798739	Mus musculus	Genetic modification of STAT5 levels reveals dose-dependent and isoform-specific requirement for cell lineage progression and differentiation.	FactorValue..VARIATION.	Stat5ab+/null	Stat5abnull/Stat5a-
E-TABM-232_26_1_2_mod.txt	ArrayExpress	E-TABM-232	-1.16760213297	Mus musculus	Transcription profiling of wild type and bic-deficient mouse T cells	Factor.Value..cell.type.	Th1	Th2
GDS3113_tissue_17_28_mod.txt	GEO	GDS3113	-3.28179921776	Homo sapiens	Various normal tissues	tissue	placenta	thyroid
E-GEOD-21354_60_1_3_mod.txt	ArrayExpress	E-GEOD-21354	-1.41462743595	Homo sapiens	gene expression profiling of three type of grade II gliomas	FactorValue..TISSUE.	diffusely infiltrating astrocytic gliomas	normal brain sample
GDS2819_individual_9_20_mod.txt	GEO	GDS2819	1.31627899289	Homo sapiens	Leukemic white blood cells and various RNA preparation protocols	individual	patient 17	patient 27
E-GEOD-20667_35_1_4_mod.txt	ArrayExpress	E-GEOD-20667	-1.4980805483	Homo sapiens	The Notch/Hes1 pathway sustains NF-B activation through CYLD repression in T cell leukemia	FactorValue..CELL.LINE.	ACC483 [HPB-ALL]	JCRB0086 [TALL-1]
GDS2819_individual_23_25_mod.txt	GEO	GDS2819	2.40981373239	Homo sapiens	Leukemic white blood cells and various RNA preparation protocols	individual	patient 5	patient 7
E-GEOD-15303_32_2_3_mod.txt	ArrayExpress	E-GEOD-15303	1.12345860499	Mus musculus	Identification of Myelin-gene Regulatory Factor as a Critical Transcriptional Regulator Required for CNS Myelination	FactorValue..GENOTYPE.	Myelin-gene Regulatory Factor control littermate	not specified
E-GEOD-24547_44_1_3_mod.txt	ArrayExpress	E-GEOD-24547	1.57282848673	Homo sapiens	Transcriptional pathway signatures for the Aurora inhibitor Danusertib	FactorValue..CELL.LINE.	A2780	HCT-116
GDS3113_tissue_11_27_mod.txt	GEO	GDS3113	1.22801061859	Homo sapiens	Various normal tissues	tissue	liver	thymus
GDS3113_tissue_20_29_mod.txt	GEO	GDS3113	1.63116314273	Homo sapiens	Various normal tissues	tissue	salivary gland	tonsil
GDS2854_protocol_1_3_mod.txt	GEO	GDS2854	-1.06444527663	Mus musculus	Myogenic transcription factor MyoD mutant expression effect on embryonic fibroblast: time course	protocol	control	wild type MyoD expression
GDS3113_tissue_25_28_mod.txt	GEO	GDS3113	-3.09946891788	Homo sapiens	Various normal tissues	tissue	spleen	thyroid
E-GEOD-18265_32_1_4_mod.txt	ArrayExpress	E-GEOD-18265	2.9659065431	Homo sapiens	Transcription profiling by array of human pluripotent stem cells	Factor.Value..cell.type.	embryonic stem cell	partially reprogrammed induced pluripotent stem cells
E-GEOD-24207_47_14_20_mod.txt	ArrayExpress	E-GEOD-24207	-1.27937194603	Mus musculus	mRNA analysis in different mouse tissues	FactorValue..TISSUE.	pancreatic acini	small intestine
E-GEOD-23583_50_4_5_mod.txt	ArrayExpress	E-GEOD-23583	2.5250483977	Homo sapiens	Highly efficient reprogramming to pluripotency and directed differentiation using synthetic mRNA	FactorValue..CELL.TYPE.	iPS cells derived from CF fibroblast	iPS cells derived from dH1CF fibroblast
GDS3113_tissue_6_31_mod.txt	GEO	GDS3113	4.59377367478	Homo sapiens	Various normal tissues	tissue	fetal kidney	Universal Human Reference RNA
E-MEXP-563_32_4_6_mod.txt	ArrayExpress	E-MEXP-563	-3.33163262226	Homo sapiens	Transcription profiling of human mesenchymal stem cells transformed with lentiviral vectors of TERT, E6, SV40 and RAS	Factor.Value..transfect.	hTERT/HPVE6/HPVE7/SV40t	wild_type
E-GEOD-21515_27_2_4_mod.txt	ArrayExpress	E-GEOD-21515	-1.19566766662	Mus musculus	Expression data from mouse ES and iPS cells	Factor.Value..CELL.LINE.	IP14D-1	IP20D-3
GDS3113_tissue_5_23_mod.txt	GEO	GDS3113	1.58734337117	Homo sapiens	Various normal tissues	tissue	fetal brain	small intestine
E-GEOD-21299_35_3_4_mod.txt	ArrayExpress	E-GEOD-21299	1.49976266607	Mus musculus	Expression data from murine cell line transduced with epitope tagged forms of Hoxa9	FactorValue..TIME.POINT.	day 4	day 5
E-GEOD-13873_34_1_2_mod.txt	ArrayExpress	E-GEOD-13873	3.63160683156	Mus musculus	Expression data from murine gastric epithelium	FactorValue..INFECTION.	infected	n/a
E-GEOD-13873_35_2_4_mod.txt	ArrayExpress	E-GEOD-13873	3.62472906792	Mus musculus	Expression data from murine gastric epithelium	FactorValue..PATHOLOGY.	hyperplasia	n/a
E-TABM-1091_32_1_5_mod.txt	ArrayExpress	E-TABM-1091	-2.61756666881	Homo sapiens	Transcriptiion profiling by array of human ratiometric mixes of high quality RNA from different tissues using different labeling protocols to provide a mechanism for assessing process improvement	Factor.Value..BATCH.	Batch1	Batch5
GDS3113_tissue_6_30_mod.txt	GEO	GDS3113	1.78259066072	Homo sapiens	Various normal tissues	tissue	fetal kidney	trachea
E-GEOD-24637_42_3_4_mod.txt	ArrayExpress	E-GEOD-24637	1.11727013217	Mus musculus	Genetic and genomic analysis of hyperlipidemia	FactorValue..TISSUE.	muscle	pancreas
GDS2237_time_1_2_mod.txt	GEO	GDS2237	-5.12221325193	Rattus norvegicus	Liver response to skin burn: time course	time	1 d	2 d
E-GEOD-27987_35_6_8_mod.txt	ArrayExpress	E-GEOD-27987	-1.50963077448	Mus musculus	Differential pre-mRNA processing in Crebbp+/- mice	FactorValue..CELL.TYPE.	Crebbp+/+ MEF	Ep300+/+ FLHSC
E-GEOD-28185_35_1_2_mod.txt	ArrayExpress	E-GEOD-28185	-3.02315186797	Homo sapiens	Non-steroidal anti-inflammatory drugs induce apoptosis and differentiation through an AP-1 and GADD45 dependent pathway in human acute myeloid leukemia cells	FactorValue..CELL.LINE.	HL60	THP-1
E-GEOD-21309_27_1_2_mod.txt	ArrayExpress	E-GEOD-21309	2.03977188694	Mus musculus	Differential gene expression patterns signifying loss of the mouse tumor supressor Gprc5a in lung epithelial cells	FactorValue..CELL.TYPE.	lung epithelial cells from tracheas of Gprc5a knockout mouse	lung epithelial cells from tracheas of Gprc5a wild type
E-GEOD-26408_38_4_5_mod.txt	ArrayExpress	E-GEOD-26408	-3.46926625154	Mus musculus	Signatures of murine B-cell development implicate Yy1 as a regulator of the germinal center-specific program	FactorValue..STRAIN.OR.LINE.	Lig4/P53 KO (Frank et al., Mol. Cell 2000;5:993-1002)	Myc/Bcl6 dual-transgenic (Pasqualucci et al., Nat. Genet. 2008;40:108-112)
GDS3113_tissue_1_30_mod.txt	GEO	GDS3113	-1.27632345425	Homo sapiens	Various normal tissues	tissue	adrenal gland	trachea
GDS3113_tissue_5_11_mod.txt	GEO	GDS3113	1.035057318	Homo sapiens	Various normal tissues	tissue	fetal brain	liver
GDS2819_individual_3_12_mod.txt	GEO	GDS2819	-2.54377133182	Homo sapiens	Leukemic white blood cells and various RNA preparation protocols	individual	patient 11	patient 2
E-GEOD-21299_35_1_3_mod.txt	ArrayExpress	E-GEOD-21299	1.85351636639	Mus musculus	Expression data from murine cell line transduced with epitope tagged forms of Hoxa9	FactorValue..TIME.POINT.	day 0	day 4
E-GEOD-15904_24_3_5_mod.txt	ArrayExpress	E-GEOD-15904	1.02994746187	Mus musculus	Transcription profiling by array of mouse mammary tumors	Factor.Value..HISTOLOGICAL.SUBTYPE.	Microacinar	not specified
E-GEOD-29848_38_3_5_mod.txt	ArrayExpress	E-GEOD-29848	1.21930797075	Mus musculus	Microarray data of differentiating embryonic stem cells overexpressing the transcription factor Msgn1	FactorValue..TREATMENT.	Day2 EBs cultured for another 48h	Day2 EBs induced with doxycycline and cultured for another 24h
GDS3113_tissue_1_25_mod.txt	GEO	GDS3113	-1.09579859565	Homo sapiens	Various normal tissues	tissue	adrenal gland	spleen
E-GEOD-29828_43_1_2_mod.txt	ArrayExpress	E-GEOD-29828	5.20575257893	Homo sapiens	Expression Profiling of Mixed Lineage Leukemia Cells Treated with a Potent Small-Molecule DOT1L Inhibitor	FactorValue..CELL.LINE.	MOLM-13	MV4-11
GDS3113_tissue_20_26_mod.txt	GEO	GDS3113	1.62124487393	Homo sapiens	Various normal tissues	tissue	salivary gland	testis
E-GEOD-18680_37_2_3_mod.txt	ArrayExpress	E-GEOD-18680	1.69727667314	Homo sapiens	Gene expression profile of human ovarian cancer cell lines in vitro	FactorValue..CELL.LINE.	parental SKOV	parental T112D
GDS2819_individual_19_25_mod.txt	GEO	GDS2819	2.94431094161	Homo sapiens	Leukemic white blood cells and various RNA preparation protocols	individual	patient 26	patient 7
GDS3142_tissue_6_8_mod.txt	GEO	GDS3142	-1.09517358297	Mus musculus	Various tissues	tissue	embryonic stem cells	fetus
GDS3113_tissue_7_31_mod.txt	GEO	GDS3113	5.71837702071	Homo sapiens	Various normal tissues	tissue	fetal liver	Universal Human Reference RNA
GDS2819_individual_17_25_mod.txt	GEO	GDS2819	2.33989906539	Homo sapiens	Leukemic white blood cells and various RNA preparation protocols	individual	patient 24	patient 7
E-GEOD-30355_34_1_2_mod.txt	ArrayExpress	E-GEOD-30355	1.99960005107	Homo sapiens	Human keratinocytes have a response to injury that upregulates CCL20 and other genes linking innate and adaptive immunity	FactorValue..GROUP.	KC LCM	KC sorted
GDS3113_tissue_6_27_mod.txt	GEO	GDS3113	1.91334185687	Homo sapiens	Various normal tissues	tissue	fetal kidney	thymus
GDS3142_tissue_6_12_mod.txt	GEO	GDS3142	-1.10071673045	Mus musculus	Various tissues	tissue	embryonic stem cells	lung
GDS2736_disease.state_1_8_mod.txt	GEO	GDS2736	-2.50196203172	Homo sapiens	Malignant fibrous histiocytoma and various soft tissue sarcomas	disease.state	dedifferentiated liposarcoma	myxoid liposarcoma
E-GEOD-20854_30_1_2_mod.txt	ArrayExpress	E-GEOD-20854	-5.37138030903	Homo sapiens	Transcription profiling by array of human endometrial cancer cells after treatment with epidermal growth factor or gefitinib	Factor.Value..disease.state.	type I endometrial adenocarcinoma	type II endometrial adenocarcinoma
GDS3113_tissue_22_25_mod.txt	GEO	GDS3113	1.55543306684	Homo sapiens	Various normal tissues	tissue	skin	spleen
E-GEOD-15904_24_6_8_mod.txt	ArrayExpress	E-GEOD-15904	1.75747821389	Mus musculus	Transcription profiling by array of mouse mammary tumors	Factor.Value..HISTOLOGICAL.SUBTYPE.	Papillary	Squamous
GDS3113_tissue_3_22_mod.txt	GEO	GDS3113	-1.32956043032	Homo sapiens	Various normal tissues	tissue	brain	skin
GDS2819_individual_2_22_mod.txt	GEO	GDS2819	5.91095572605	Homo sapiens	Leukemic white blood cells and various RNA preparation protocols	individual	patient 10	patient 4
GDS3113_tissue_17_22_mod.txt	GEO	GDS3113	-1.73776336672	Homo sapiens	Various normal tissues	tissue	placenta	skin
E-GEOD-23583_50_1_9_mod.txt	ArrayExpress	E-GEOD-23583	-3.96013688023	Homo sapiens	Highly efficient reprogramming to pluripotency and directed differentiation using synthetic mRNA	FactorValue..CELL.TYPE.	BJ fibroblast	not specified
E-GEOD-15543_32_3_4_mod.txt	ArrayExpress	E-GEOD-15543	1.59751189565	Homo sapiens	Transcription profiling by array of human pancreatic islet cells after in vitro expansion	Factor.Value.protocol.	expansion protocol: PPRF	expansion protocol: Whittier
E-GEOD-23845_38_1_2_mod.txt	ArrayExpress	E-GEOD-23845	-3.76052948665	Mus musculus	Time course for bladder UCC development in UPII-SV40Tag mice	FactorValue..GENOTYPE.	Transgenic, uroplakin II promoter driving expression of SV40Tag	wild type littermates
GDS2177_tissue_1_2_mod.txt	GEO	GDS2177	2.47449444214	Mus musculus	Type 1 diabetes model: autoimmune target organs (MG-U74A)	tissue	lacrimal gland	pancreas
GDS3113_tissue_9_29_mod.txt	GEO	GDS3113	1.47688795031	Homo sapiens	Various normal tissues	tissue	heart	tonsil
E-GEOD-27192_44_1_2_mod.txt	ArrayExpress	E-GEOD-27192	1.33011458234	Homo sapiens	Expression data in HK-2 cells following exposure to Ota hd	FactorValue..TREATMENT.	control	Ota
E-GEOD-29328_32_4_5_mod.txt	ArrayExpress	E-GEOD-29328	-3.54001937296	Mus musculus	Expression data from squamous cell carcinoma stem cells	FactorValue..GENOTYPE.	TbRII(fl/fl)	wild type
E-GEOD-25123_38_1_2_mod.txt	ArrayExpress	E-GEOD-25123	1.39817507196	Mus musculus	PPARg and IL-4-induced gene expression data from PPARg +/- LysCre and PPARg fl/- LysCre mouse bone marrow-derived macrophages	FactorValue..ACTIVATION.	control	IL-4
E-GEOD-22533_30_1_2_mod.txt	ArrayExpress	E-GEOD-22533	-3.11945641207	Homo sapiens	Breast cancer cells resistant to hormone deprivation maintain an estrogen receptor alpha-dependent, E2F-directed transcriptional program	FactorValue..CELL.LINE.	HCC-1428/LTED	MCF-7/LTED
E-GEOD-17906_35_1_3_mod.txt	ArrayExpress	E-GEOD-17906	4.14248577466	Homo sapiens	Transcription profiling by array of human CD90 positive prostate stromal fibromuscular tumor cells	Factor.Value.cell.type.		CD26 positive
E-GEOD-23994_24_1_2_mod.txt	ArrayExpress	E-GEOD-23994	-1.26556083902	Homo sapiens	A molecular signature of normal breast epithelial and stromal cells from Li-Fraumeni syndrome mutation carriers	Factor.Value..CELL.TYPE.	epithelial	stromal
E-GEOD-24547_44_1_2_mod.txt	ArrayExpress	E-GEOD-24547	1.89885478918	Homo sapiens	Transcriptional pathway signatures for the Aurora inhibitor Danusertib	FactorValue..CELL.LINE.	A2780	COLO205
GDS2416_individual_6_9_mod.txt	GEO	GDS2416	1.85284871283	Homo sapiens	Different areas of cervical cancer tumors	individual	patient 15	patient 6
E-GEOD-22381_40_1_2_mod.txt	ArrayExpress	E-GEOD-22381	-6.92559338041	Mus musculus	Identification of downstream transcriptional targets of Dlx5 during early mouse inner ear (otocyst/otic vesicle) development	FactorValue..TISSUE.	2B1 cell line	inner ear
E-GEOD-36643_30_2_4_mod.txt	ArrayExpress	E-GEOD-36643	2.38274444112	Homo sapiens	Ganglioside GD2 identifies Breast Cancer Stem Cells: Targeting GD3 Synthase Inhibits GD2 Expression and Tumor Growth	FactorValue..FACS.SORTED.CELL.POPULATION.	CD44_high	GD2+
GDS3113_tissue_5_31_mod.txt	GEO	GDS3113	4.94349975451	Homo sapiens	Various normal tissues	tissue	fetal brain	Universal Human Reference RNA
E-GEOD-24705_38_1_10_mod.txt	ArrayExpress	E-GEOD-24705	-1.63033686635	Mus musculus	mRNA expression data from iPSCs	FactorValue..CELL.LINE.	ES cells cell line E14	ntiPS cell line ntiPSM2_3_3
E-GEOD-35416_38_4_6_mod.txt	ArrayExpress	E-GEOD-35416	-1.15400042101	Mus musculus	Transcriptional profiling of mouse inner cell mass of the blastocyst	FactorValue..SOURCE.AGE.	E13.5	not specified
GDS3113_tissue_21_31_mod.txt	GEO	GDS3113	3.4193146006	Homo sapiens	Various normal tissues	tissue	skeletal muscle	Universal Human Reference RNA
GDS1956_disease.state_10_11_mod.txt	GEO	GDS1956	1.21701997594	Homo sapiens	Various muscle diseases (HG-U133A)	disease.state	juvenile dermatomyositis	normal
GDS2604_cell.line_1_3_mod.txt	GEO	GDS2604	8.35985460995	Homo sapiens	Asbestos effect on epithelial and mesothelial lung cell lines: time course	cell.line	A549	Met5A
E-GEOD-35250_35_1_2_mod.txt	ArrayExpress	E-GEOD-35250	2.35126030544	Homo sapiens	NOF vs. coCAF 7d	FactorValue..CELL.TYPE.	human cancer-associated fibroblast co-cultured with ovarian cancer cells, 7d	human normal omental fibroblast
GDS3068_cell.type_1_2_mod.txt	GEO	GDS3068	-1.62359459277	Homo sapiens	Primary hepatocytes and HepG2 liver cells response to various fluoroquinolones	cell.type	HepG2	primary hepatocyte
E-GEOD-24207_47_8_11_mod.txt	ArrayExpress	E-GEOD-24207	-4.1185254398	Mus musculus	mRNA analysis in different mouse tissues	FactorValue..TISSUE.	insulinoma	lung
GDS3113_tissue_15_31_mod.txt	GEO	GDS3113	4.99073506071	Homo sapiens	Various normal tissues	tissue	pancreas	Universal Human Reference RNA
E-GEOD-24207_47_8_15_mod.txt	ArrayExpress	E-GEOD-24207	-4.09309757702	Mus musculus	mRNA analysis in different mouse tissues	FactorValue..TISSUE.	insulinoma	pancreatic islets
GDS2819_disease.state_3_5_mod.txt	GEO	GDS2819	-1.69326469614	Homo sapiens	Leukemic white blood cells and various RNA preparation protocols	disease.state	ALL with t 12, 21	AML with t 11q23, MLL
GDS3113_tissue_7_16_mod.txt	GEO	GDS3113	2.35134453912	Homo sapiens	Various normal tissues	tissue	fetal liver	peripheral blood lymphocyte
GDS3113_tissue_19_25_mod.txt	GEO	GDS3113	1.89215616886	Homo sapiens	Various normal tissues	tissue	retina	spleen
E-GEOD-25098_32_4_7_mod.txt	ArrayExpress	E-GEOD-25098	-8.39355040938	Mus musculus	Rhabdomyosarcoma can be initiated in activated Pax7+ Muscle Progenitor Cells	FactorValue..GENOTYPE.VARIATION.	Pax7-CreER; LSL-KrasG12D;Trp53Flox/Flox	Wild Type mice
E-GEOD-10971_35_11_12_mod.txt	ArrayExpress	E-GEOD-10971	3.98802409155	Homo sapiens	Transcription profiling by array of human non-malignant fallopian tube epithelium and high grade serous carcinoma	Factor.Value.genotype.	not applicable	Unknown
GDS3113_tissue_26_31_mod.txt	GEO	GDS3113	2.01733190865	Homo sapiens	Various normal tissues	tissue	testis	Universal Human Reference RNA
E-GEOD-36643_30_2_3_mod.txt	ArrayExpress	E-GEOD-36643	1.98607885717	Homo sapiens	Ganglioside GD2 identifies Breast Cancer Stem Cells: Targeting GD3 Synthase Inhibits GD2 Expression and Tumor Growth	FactorValue..FACS.SORTED.CELL.POPULATION.	CD44_high	GD2-
GDS2819_individual_11_26_mod.txt	GEO	GDS2819	2.43567573907	Homo sapiens	Leukemic white blood cells and various RNA preparation protocols	individual	patient 19	patient 8
GDS3113_tissue_8_25_mod.txt	GEO	GDS3113	1.50394502898	Homo sapiens	Various normal tissues	tissue	fetal thymus	spleen
GDS2416_individual_6_8_mod.txt	GEO	GDS2416	1.49829501881	Homo sapiens	Different areas of cervical cancer tumors	individual	patient 15	patient 4
GDS2819_individual_25_27_mod.txt	GEO	GDS2819	-3.19423775947	Homo sapiens	Leukemic white blood cells and various RNA preparation protocols	individual	patient 7	patient 9
GDS2819_individual_16_19_mod.txt	GEO	GDS2819	-2.00646533022	Homo sapiens	Leukemic white blood cells and various RNA preparation protocols	individual	patient 23	patient 26
GDS1490_tissue_2_24_mod.txt	GEO	GDS1490	1.1736986863	Mus musculus	Neural tissue profiling	tissue	amygdala	pituitary
E-GEOD-19732_23_3_6_mod.txt	ArrayExpress	E-GEOD-19732	-1.10940806177	Mus musculus	Identification of genes characteristic of committed preadipocyte fibroblasts	Factor.Value..CELL.LINE.	Swiss22	Swiss8
GDS3113_tissue_17_32_mod.txt	GEO	GDS3113	-1.6820167501	Homo sapiens	Various normal tissues	tissue	placenta	uterus
E-GEOD-24705_38_7_10_mod.txt	ArrayExpress	E-GEOD-24705	-1.3034839832	Mus musculus	mRNA expression data from iPSCs	FactorValue..CELL.LINE.	ntES cells cell line NTM2_4	ntiPS cell line ntiPSM2_3_3
E-GEOD-24207_47_1_14_mod.txt	ArrayExpress	E-GEOD-24207	1.39448919079	Mus musculus	mRNA analysis in different mouse tissues	FactorValue..TISSUE.	adipose tissue	pancreatic acini
GDS3113_tissue_4_5_mod.txt	GEO	GDS3113	-1.15164736846	Homo sapiens	Various normal tissues	tissue	colon	fetal brain
GDS3113_tissue_2_6_mod.txt	GEO	GDS3113	-1.30502230596	Homo sapiens	Various normal tissues	tissue	bone marrow	fetal kidney
E-GEOD-24207_47_8_13_mod.txt	ArrayExpress	E-GEOD-24207	-4.36215863405	Mus musculus	mRNA analysis in different mouse tissues	FactorValue..TISSUE.	insulinoma	ovary
GDS3113_tissue_19_24_mod.txt	GEO	GDS3113	1.34260393886	Homo sapiens	Various normal tissues	tissue	retina	spinal cord
E-GEOD-27546_38_4_6_mod.txt	ArrayExpress	E-GEOD-27546	1.1729507168	Mus musculus	Effects of HMGN variants on cellular transcription profile	FactorValue..GENOTYPE.VARIATION.	HMGN1 WT	HMGN1_N3swap
E-TABM-1091_31_1_3_mod.txt	ArrayExpress	E-TABM-1091	1.0293053295	Homo sapiens	Transcriptiion profiling by array of human ratiometric mixes of high quality RNA from different tissues using different labeling protocols to provide a mechanism for assessing process improvement	Factor.Value..PROTOCOL.	Labeling: IVT	Labeling: Ovation
GDS2819_individual_20_25_mod.txt	GEO	GDS2819	1.25903128732	Homo sapiens	Leukemic white blood cells and various RNA preparation protocols	individual	patient 27	patient 7
GDS2819_individual_12_25_mod.txt	GEO	GDS2819	3.29195958583	Homo sapiens	Leukemic white blood cells and various RNA preparation protocols	individual	patient 2	patient 7
GDS3113_tissue_10_31_mod.txt	GEO	GDS3113	4.67995950085	Homo sapiens	Various normal tissues	tissue	kidney	Universal Human Reference RNA
GDS3113_tissue_8_12_mod.txt	GEO	GDS3113	1.14385158193	Homo sapiens	Various normal tissues	tissue	fetal thymus	lung
GDS3113_tissue_1_32_mod.txt	GEO	GDS3113	-2.59548504587	Homo sapiens	Various normal tissues	tissue	adrenal gland	uterus
E-GEOD-24207_47_8_21_mod.txt	ArrayExpress	E-GEOD-24207	-4.12673404044	Mus musculus	mRNA analysis in different mouse tissues	FactorValue..TISSUE.	insulinoma	spleen
E-GEOD-19616_36_2_4_mod.txt	ArrayExpress	E-GEOD-19616	4.17717570522	Mus musculus	Gene expression profiling of mouse p53-deficient epidermal carcinoma defines molecular determinants of human cancer malignancy (testing dataset)	FactorValue..HISTOLOGICAL.SUBTYPE.	not specified	spindle cell carcinoma
GDS3113_tissue_7_25_mod.txt	GEO	GDS3113	3.08771886524	Homo sapiens	Various normal tissues	tissue	fetal liver	spleen
E-GEOD-32386_33_2_3_mod.txt	ArrayExpress	E-GEOD-32386	-3.01649468912	Mus musculus	Expression profiling of murine neuroblastoma in transgenic mice	FactorValue..GENOTYPE.	transgenic for neural crest-specific expression of mutated ALK	transgenic for neural crest-specific expression of MYCN
E-GEOD-18680_37_1_4_mod.txt	ArrayExpress	E-GEOD-18680	2.5124240958	Homo sapiens	Gene expression profile of human ovarian cancer cell lines in vitro	FactorValue..CELL.LINE.	parental IGROV	parental TOV21G
GDS3113_tissue_9_19_mod.txt	GEO	GDS3113	-1.03851273417	Homo sapiens	Various normal tissues	tissue	heart	retina
E-GEOD-15155_32_2_3_mod.txt	ArrayExpress	E-GEOD-15155	-1.62850467539	Mus musculus	Gene profiling of quiescent and activated skeletal muscle satellite cells by an in vivo approach	FactorValue..AGE.	cultured (3days)	young (1week)
GDS2819_individual_4_19_mod.txt	GEO	GDS2819	-1.86993957975	Homo sapiens	Leukemic white blood cells and various RNA preparation protocols	individual	patient 12	patient 26
GDS3113_tissue_1_10_mod.txt	GEO	GDS3113	-3.14509994103	Homo sapiens	Various normal tissues	tissue	adrenal gland	kidney
GDS3113_tissue_11_17_mod.txt	GEO	GDS3113	1.46011458092	Homo sapiens	Various normal tissues	tissue	liver	placenta
E-GEOD-22007_49_1_2_mod.txt	ArrayExpress	E-GEOD-22007	1.7521383408	Mus musculus	Targeting resistance to Smoothened antagonists by inhibiting the PI3K pathway	FactorValue..GENOTYPE.	Ptch+/-HIC+/-	Ptch+/-p53-/-
E-GEOD-29832_34_3_4_mod.txt	ArrayExpress	E-GEOD-29832	1.80461519855	Homo sapiens	Expression data from pure/mixed blood and breast to test feasability of deconvolution of clinical samples	FactorValue..TISSUE.	blood	breast
GDS3113_tissue_1_6_mod.txt	GEO	GDS3113	-3.05891411497	Homo sapiens	Various normal tissues	tissue	adrenal gland	fetal kidney
GDS3113_tissue_17_19_mod.txt	GEO	GDS3113	-2.07448646874	Homo sapiens	Various normal tissues	tissue	placenta	retina
E-GEOD-29828_45_1_2_mod.txt	ArrayExpress	E-GEOD-29828	-5.20575257893	Homo sapiens	Expression Profiling of Mixed Lineage Leukemia Cells Treated with a Potent Small-Molecule DOT1L Inhibitor	FactorValue..GROWTH.CONDITIONS.	IMDM with 10% FBS	RPMI with 10% FBS
GDS3113_tissue_3_13_mod.txt	GEO	GDS3113	1.05984036051	Homo sapiens	Various normal tissues	tissue	brain	mammary gland
GDS3113_tissue_16_31_mod.txt	GEO	GDS3113	3.36703248159	Homo sapiens	Various normal tissues	tissue	peripheral blood lymphocyte	Universal Human Reference RNA
GDS1622_cell.type_1_2_mod.txt	GEO	GDS1622	-7.47056064413	Rattus norvegicus	Arginine deprivation effect on tumorigenic hepatic cells	cell.type	normal	tumorigenic
E-GEOD-20987_30_1_3_mod.txt	ArrayExpress	E-GEOD-20987	2.73819214497	Mus musculus	Gene expression data of BCR-ABL1 transformed B cell precursors from BCL6 wild-type and BCL6 knockout mice	Factor.Value..GENDER.	female	male
E-GEOD-20033_27_1_7_mod.txt	ArrayExpress	E-GEOD-20033	-1.49195438432	Homo sapiens	Minicircle-derived iPS cells - Affymetrix Data	Factor.Value..CELL.TYPE.	adipose stem cells derived from adult human donor	iPS cells from episomal vectors (Defined Factor sub-clone)
E-GEOD-13873_35_4_5_mod.txt	ArrayExpress	E-GEOD-13873	-3.62539939522	Mus musculus	Expression data from murine gastric epithelium	FactorValue..PATHOLOGY.	n/a	none
E-GEOD-25098_32_1_7_mod.txt	ArrayExpress	E-GEOD-25098	-7.74897534999	Mus musculus	Rhabdomyosarcoma can be initiated in activated Pax7+ Muscle Progenitor Cells	FactorValue..GENOTYPE.VARIATION.	LSL-KrasG12D;Trp53Flox/Flox	Wild Type mice
GDS3113_tissue_21_26_mod.txt	GEO	GDS3113	1.40198269195	Homo sapiens	Various normal tissues	tissue	skeletal muscle	testis
GDS2416_individual_4_6_mod.txt	GEO	GDS2416	-1.73827086328	Homo sapiens	Different areas of cervical cancer tumors	individual	patient 12	patient 15
E-GEOD-19650_38_1_4_mod.txt	ArrayExpress	E-GEOD-19650	-1.29150298659	Homo sapiens	Expression data from epithelial cells during the process of multistep pancreatic carcinogenesis	FactorValue..DISEASE.STATUS.	intraductal papillary-mucinous adenoma (IPMA)	normal
E-GEOD-24207_47_11_14_mod.txt	ArrayExpress	E-GEOD-24207	1.41833982832	Mus musculus	mRNA analysis in different mouse tissues	FactorValue..TISSUE.	lung	pancreatic acini
E-GEOD-23938_38_2_6_mod.txt	ArrayExpress	E-GEOD-23938	-3.07810291343	Mus musculus	Comprehensive genomic profiling identified miRNA signatures associated with mammary tumor differentiation and development	FactorValue..GENETICALLY.ENGINEERED.MOUSE.MODEL.	C3TAg	MMTV-PymT
E-GEOD-14001_28_1_3_mod.txt	ArrayExpress	E-GEOD-14001	-1.98825778418	Homo sapiens	Transcription profiling by array of human high and low grade ovarian serous carcinomas	Factor.Value.disease.staging.		low grade
E-GEOD-18265_32_3_4_mod.txt	ArrayExpress	E-GEOD-18265	3.24501218973	Homo sapiens	Transcription profiling by array of human pluripotent stem cells	Factor.Value..cell.type.	induced pluripotent stem cells	partially reprogrammed induced pluripotent stem cells
E-GEOD-34126_43_2_4_mod.txt	ArrayExpress	E-GEOD-34126	-2.5987560426	Mus musculus	An Animal Model of Myc-driven medulloblastoma	FactorValue..GENOTYPE.VARIATION.	Ptch1 mutant	wild type
GDS3113_tissue_7_23_mod.txt	GEO	GDS3113	2.36222063736	Homo sapiens	Various normal tissues	tissue	fetal liver	small intestine
GDS1962_disease.state_1_3_mod.txt	GEO	GDS1962	-1.18752096031	Homo sapiens	Glioma-derived stem cell factor effect on angiogenesis in the brain	disease.state	astrocytomas	non-tumor
GDS2819_individual_2_3_mod.txt	GEO	GDS2819	5.95602493485	Homo sapiens	Leukemic white blood cells and various RNA preparation protocols	individual	patient 10	patient 11
E-GEOD-24207_47_13_19_mod.txt	ArrayExpress	E-GEOD-24207	1.02779221537	Mus musculus	mRNA analysis in different mouse tissues	FactorValue..TISSUE.	ovary	seminal vesicle
GDS2416_individual_1_6_mod.txt	GEO	GDS2416	-1.57661624515	Homo sapiens	Different areas of cervical cancer tumors	individual	patient 1	patient 15
E-MEXP-3020_33_1_4_mod.txt	ArrayExpress	E-MEXP-3020	-5.8179339005	Homo sapiens	Low Dose PDT - Human Cells	Factor.Value..CELL_LINE.	DU145	U87
GDS3113_tissue_1_12_mod.txt	GEO	GDS3113	-1.4558920427	Homo sapiens	Various normal tissues	tissue	adrenal gland	lung
E-GEOD-20124_28_2_4_mod.txt	ArrayExpress	E-GEOD-20124	3.0741658279	Homo sapiens	Transcriptome analysis of human Whartons jelly stem cells: in-house analysis	FactorValue..CELL.TYPE.	embryonic stem cell line	Wharton's jelly stem cell line
GDS3113_tissue_19_23_mod.txt	GEO	GDS3113	1.16665794098	Homo sapiens	Various normal tissues	tissue	retina	small intestine
E-GEOD-18680_37_3_4_mod.txt	ArrayExpress	E-GEOD-18680	-1.42457536155	Homo sapiens	Gene expression profile of human ovarian cancer cell lines in vitro	FactorValue..CELL.LINE.	parental T112D	parental TOV21G
GDS3113_tissue_6_29_mod.txt	GEO	GDS3113	2.58636003494	Homo sapiens	Various normal tissues	tissue	fetal kidney	tonsil
E-GEOD-20089_24_2_4_mod.txt	ArrayExpress	E-GEOD-20089	4.51744607543	Homo sapiens	Pseudopod Experiment	Factor.Value..CELL.LINE.	HT1080	MDA435
E-GEOD-24207_47_14_15_mod.txt	ArrayExpress	E-GEOD-24207	-1.39291196554	Mus musculus	mRNA analysis in different mouse tissues	FactorValue..TISSUE.	pancreatic acini	pancreatic islets
GDS3113_tissue_28_31_mod.txt	GEO	GDS3113	5.73012707335	Homo sapiens	Various normal tissues	tissue	thyroid	Universal Human Reference RNA
E-MEXP-2517_42_1_2_mod.txt	ArrayExpress	E-MEXP-2517	-5.03138415036	Mus musculus	Transcriptional profiling of mouse non-metastatic and metastatic melanoma cells with and without 5AzaCdR treatment.	Factor.Value..CELL_LINE.	4C11minus	4C11plus
E-GEOD-20667_35_3_4_mod.txt	ArrayExpress	E-GEOD-20667	4.37594972944	Homo sapiens	The Notch/Hes1 pathway sustains NF-B activation through CYLD repression in T cell leukemia	FactorValue..CELL.LINE.	JCRB0033 [CEM]	JCRB0086 [TALL-1]
GDS2366_development.stage_1_3_mod.txt	GEO	GDS2366	-1.15198973716	Homo sapiens	Preadipocytes from anatomically separate fat depots (HG-U133A)	development.stage	differentiated	undifferentiated
E-GEOD-20667_35_1_5_mod.txt	ArrayExpress	E-GEOD-20667	-2.10752324436	Homo sapiens	The Notch/Hes1 pathway sustains NF-B activation through CYLD repression in T cell leukemia	FactorValue..CELL.LINE.	ACC483 [HPB-ALL]	KOPT-K
GDS639_age_4_6_mod.txt	GEO	GDS639	-1.48622720475	Mus musculus	Dystrophin-deficient mdx hindlimb muscle development time course	age	28 day	7 day
E-GEOD-32670_60_2_3_mod.txt	ArrayExpress	E-GEOD-32670	4.48671611897	Homo sapiens	Time-course effect of estradiol and estradiol-BSA on early gene expression	FactorValue..CELL.LINE.	MDA-MB-231	SKBR3
GDS1956_disease.state_2_6_mod.txt	GEO	GDS1956	1.69284596342	Homo sapiens	Various muscle diseases (HG-U133A)	disease.state	amyotophic lateral sclerosis	dysferlin mutation
E-GEOD-11990_36_1_2_mod.txt	ArrayExpress	E-GEOD-11990	4.46056673962	Mus musculus	Gene expression profiling of mouse p53-deficient epidermal carcinoma defines molecular determinants of human cancer malignancy (training dataset)	FactorValue..TISSUE.	skin	squamous cell carcinoma
E-GEOD-17315_32_1_3_mod.txt	ArrayExpress	E-GEOD-17315	-1.03927924275	Homo sapiens	mRNA expression upon reconstitution of miR-130a, miR-203 and miR-205 in prostate cancer cell line LNCaP	FactorValue..MIRNA.	miR-130a	miR-205
GDS2819_individual_18_25_mod.txt	GEO	GDS2819	1.38978499481	Homo sapiens	Leukemic white blood cells and various RNA preparation protocols	individual	patient 25	patient 7
E-GEOD-13987_34_1_3_mod.txt	ArrayExpress	E-GEOD-13987	-1.40969707489	Homo sapiens	Transcription profiling of human B lineage chronic lymphocytic leukemia, normal B, and normal T cells treated with rolipram, a PDE4 inhibitor	Factor.Value.cell.type.	B cell	T cell
E-GEOD-24207_47_8_23_mod.txt	ArrayExpress	E-GEOD-24207	-3.8741549509	Mus musculus	mRNA analysis in different mouse tissues	FactorValue..TISSUE.	insulinoma	thymus
E-GEOD-27414_36_1_2_mod.txt	ArrayExpress	E-GEOD-27414	1.31843809316	Homo sapiens	Human umbilical cord blood-derived mesenchymal stem cells from 2 donors	FactorValue..DONOR.	M01	M02
GDS2819_individual_12_20_mod.txt	GEO	GDS2819	2.0329282985	Homo sapiens	Leukemic white blood cells and various RNA preparation protocols	individual	patient 2	patient 27
GDS3113_tissue_8_13_mod.txt	GEO	GDS3113	2.33791275297	Homo sapiens	Various normal tissues	tissue	fetal thymus	mammary gland
GDS2819_individual_2_16_mod.txt	GEO	GDS2819	5.76636757746	Homo sapiens	Leukemic white blood cells and various RNA preparation protocols	individual	patient 10	patient 23
GDS2514_disease.state_2_3_mod.txt	GEO	GDS2514	2.81254446939	Mus musculus	Breast cancer formation in WAP-SVT/t transgenic animals	disease.state	normal NMRI animals	WAP-SVT/t breast tumors
GDS3113_tissue_8_27_mod.txt	GEO	GDS3113	1.45417136653	Homo sapiens	Various normal tissues	tissue	fetal thymus	thymus
E-GEOD-24705_38_4_10_mod.txt	ArrayExpress	E-GEOD-24705	-2.70402133762	Mus musculus	mRNA expression data from iPSCs	FactorValue..CELL.LINE.	iPS cell line iPSM2_3	ntiPS cell line ntiPSM2_3_3
E-GEOD-15151_29_1_2_mod.txt	ArrayExpress	E-GEOD-15151	4.03010895325	Homo sapiens	Synthetic Lethal Interaction Between Oncogenic KRAS Dependency and Suppression of STK33 in Human Cancer Cells	Factor.Value.cell.line.	NOMO-1	SKM-1
E-GEOD-30516_31_1_3_mod.txt	ArrayExpress	E-GEOD-30516	5.0445224246	Homo sapiens	Dynamic re-wiring of apoptotic signaling networks enhances tumor cell killing by DNA damage	FactorValue..CELL.LINE.	BT20	MDA-MB-453
GDS1027_time_1_4_mod.txt	GEO	GDS1027	-1.04554050607	Rattus norvegicus	Sulfur mustard effect on lungs: dose response and time course	time	0.5 h	3 h
E-GEOD-14897_25_1_5_mod.txt	ArrayExpress	E-GEOD-14897	-1.52807233825	Homo sapiens	Transcription profiling by array of human hepatic cells derived from foreskin fibroblast cells or embryonic stem cells	FactorValue.cell.type.	fibroblast	stem cell post hepatic differentiation
GDS3113_tissue_6_17_mod.txt	GEO	GDS3113	2.1454458192	Homo sapiens	Various normal tissues	tissue	fetal kidney	placenta
GDS2362_infection_1_3_mod.txt	GEO	GDS2362	1.44908378409	Homo sapiens	Presymptomatic and symptomatic malaria: peripheral blood mononuclear cells	infection	acute infection	uninfected baseline
E-GEOD-30516_31_2_3_mod.txt	ArrayExpress	E-GEOD-30516	4.9549121735	Homo sapiens	Dynamic re-wiring of apoptotic signaling networks enhances tumor cell killing by DNA damage	FactorValue..CELL.LINE.	MCF	MDA-MB-453
GDS3113_tissue_3_11_mod.txt	GEO	GDS3113	-1.05191164452	Homo sapiens	Various normal tissues	tissue	brain	liver
GDS1282_disease.state_1_3_mod.txt	GEO	GDS1282	-1.41729337	Homo sapiens	Clear cell sarcoma of the kidney	disease.state	clear cell sarcoma of the kidney	Wilms' tumor
GDS2819_individual_2_24_mod.txt	GEO	GDS2819	3.90400709894	Homo sapiens	Leukemic white blood cells and various RNA preparation protocols	individual	patient 10	patient 6
E-MEXP-2517_39_1_2_mod.txt	ArrayExpress	E-MEXP-2517	5.03138415036	Mus musculus	Transcriptional profiling of mouse non-metastatic and metastatic melanoma cells with and without 5AzaCdR treatment.	Factor.Value..CellType.	metastatic melanoma	non-metastatic melanoma
GDS1265_age_3_4_mod.txt	GEO	GDS1265	1.47548449672	Mus musculus	Oocyte development (MOE430A)	age	22 d	2 d
GDS3113_tissue_1_5_mod.txt	GEO	GDS3113	-3.4086401947	Homo sapiens	Various normal tissues	tissue	adrenal gland	fetal brain
GDS3113_tissue_3_7_mod.txt	GEO	GDS3113	-2.86184622872	Homo sapiens	Various normal tissues	tissue	brain	fetal liver
E-GEOD-14897_25_1_3_mod.txt	ArrayExpress	E-GEOD-14897	-1.62434330829	Homo sapiens	Transcription profiling by array of human hepatic cells derived from foreskin fibroblast cells or embryonic stem cells	FactorValue.cell.type.	fibroblast	induced pluripotent stem cell
GDS3113_tissue_18_29_mod.txt	GEO	GDS3113	2.17973581614	Homo sapiens	Various normal tissues	tissue	prostate	tonsil
E-GEOD-35957_44_1_2_mod.txt	ArrayExpress	E-GEOD-35957	-1.84893843482	Homo sapiens	Effects of Cellular Senescence on Human Mesenchymal Stem Cells	FactorValue..PASSAGE.	long term-cultivation (cellular senescence state)	passage 1
GDS1209_tissue_6_10_mod.txt	GEO	GDS1209	3.78773535981	Homo sapiens	Sarcoma and hypoxia	tissue	fibrosarcoma	leiomyosarcoma
E-GEOD-24207_47_8_17_mod.txt	ArrayExpress	E-GEOD-24207	-3.71998142708	Mus musculus	mRNA analysis in different mouse tissues	FactorValue..TISSUE.	insulinoma	placenta
E-GEOD-35416_34_5_8_mod.txt	ArrayExpress	E-GEOD-35416	-1.74042936624	Mus musculus	Transcriptional profiling of mouse inner cell mass of the blastocyst	FactorValue..CELL.TYPE.	MEFs passage 2 cultured in Serum	SGMs FACSorted for Oct4/GFP-
E-GEOD-15155_34_1_2_mod.txt	ArrayExpress	E-GEOD-15155	-1.40631516672	Mus musculus	Gene profiling of quiescent and activated skeletal muscle satellite cells by an in vivo approach	FactorValue..ORIGIN.	cultured	freshly isolated
E-GEOD-37290_32_1_2_mod.txt	ArrayExpress	E-GEOD-37290	-1.38594455031	Homo sapiens	Expression Data from HNF1b-knockdown RMG2-ovarian cancer cells	FactorValue..TRANSFECTED.WITH.	HNF1b-targeting shRNA (clones V2LHS_196459)	HNF1b-targeting shRNA (clones V2LHS_204881)
GDS3113_tissue_14_31_mod.txt	GEO	GDS3113	3.40509332232	Homo sapiens	Various normal tissues	tissue	ovary	Universal Human Reference RNA
E-GEOD-33145_31_1_2_mod.txt	ArrayExpress	E-GEOD-33145	-3.43593994306	Homo sapiens	Expression data from DKAT and other breast cancer cell lines under baseline growth conditions	FactorValue..CELL.LINE.	Human breast cancer-derived cell line DKAT	Human breast cancer-derived cell line HMEC
GDS3113_tissue_5_17_mod.txt	GEO	GDS3113	2.49517189893	Homo sapiens	Various normal tissues	tissue	fetal brain	placenta
GDS3142_tissue_5_6_mod.txt	GEO	GDS3142	1.15884395379	Mus musculus	Various tissues	tissue	diaphragm	embryonic stem cells
GDS3113_tissue_5_30_mod.txt	GEO	GDS3113	2.13231674044	Homo sapiens	Various normal tissues	tissue	fetal brain	trachea
E-GEOD-16238_35_1_2_mod.txt	ArrayExpress	E-GEOD-16238	-7.34704119258	Homo sapiens	Genome-wide identification of binding sites of Evi1 in human myeloid cell lines	Factor.Value..DISEASE.	erythroleukemia (AML M6)	squamous cell carcinoma of the lung
E-GEOD-26408_38_2_4_mod.txt	ArrayExpress	E-GEOD-26408	3.93891590567	Mus musculus	Signatures of murine B-cell development implicate Yy1 as a regulator of the germinal center-specific program	FactorValue..STRAIN.OR.LINE.	B6	Lig4/P53 KO (Frank et al., Mol. Cell 2000;5:993-1002)
E-GEOD-20089_24_3_4_mod.txt	ArrayExpress	E-GEOD-20089	4.5674096193	Homo sapiens	Pseudopod Experiment	Factor.Value..CELL.LINE.	MDA231	MDA435
GDS1956_disease.state_2_4_mod.txt	GEO	GDS1956	2.08732891952	Homo sapiens	Various muscle diseases (HG-U133A)	disease.state	amyotophic lateral sclerosis	Calpain 3 mutation
GDS3113_tissue_7_13_mod.txt	GEO	GDS3113	3.92168658923	Homo sapiens	Various normal tissues	tissue	fetal liver	mammary gland
GDS2819_individual_17_20_mod.txt	GEO	GDS2819	1.08086777807	Homo sapiens	Leukemic white blood cells and various RNA preparation protocols	individual	patient 24	patient 27
E-GEOD-14519_33_1_3_mod.txt	ArrayExpress	E-GEOD-14519	-4.18107371861	Homo sapiens	Transcription profiling by array of human multiple myeloma cell lines after treatment with arsenic	Factor.Value.cell.line.	8226/S	MM.1s
E-GEOD-24705_38_7_9_mod.txt	ArrayExpress	E-GEOD-24705	-1.24524562768	Mus musculus	mRNA expression data from iPSCs	FactorValue..CELL.LINE.	ntES cells cell line NTM2_4	ntiPS cell line ntiPSM1_8_3
GDS2819_individual_3_10_mod.txt	GEO	GDS2819	-5.30071235025	Homo sapiens	Leukemic white blood cells and various RNA preparation protocols	individual	patient 11	patient 18
GDS2958_cell.line_1_3_mod.txt	GEO	GDS2958	7.0014583541	Homo sapiens	Tumor suppressor PTEN depletion effect on various cell lines	cell.line	A431	SKBR-3
E-MEXP-3020_26_1_2_mod.txt	ArrayExpress	E-MEXP-3020	4.36821678424	Homo sapiens	Low Dose PDT - Human Cells	Factor.Value..CELL_TYPE.	glioblastoma	prostate carcinoma
GDS3113_tissue_16_28_mod.txt	GEO	GDS3113	-2.36309459177	Homo sapiens	Various normal tissues	tissue	peripheral blood lymphocyte	thyroid
GDS2177_age_2_3_mod.txt	GEO	GDS2177	-1.16365398445	Mus musculus	Type 1 diabetes model: autoimmune target organs (MG-U74A)	age	6 wk	9 wk
E-GEOD-16615_46_2_9_mod.txt	ArrayExpress	E-GEOD-16615	-1.23860692733	Homo sapiens	gene expression in human subcutaneous adipose tissue after CLA intervention	FactorValue..SUBJECT.	2	9
GDS3113_tissue_21_29_mod.txt	GEO	GDS3113	1.41190096076	Homo sapiens	Various normal tissues	tissue	skeletal muscle	tonsil
GDS3113_tissue_5_24_mod.txt	GEO	GDS3113	1.76328936905	Homo sapiens	Various normal tissues	tissue	fetal brain	spinal cord
E-TABM-672_24_5_9_mod.txt	ArrayExpress	E-TABM-672	1.10825670473	Mus musculus	Transcription profiling of mouse embyronic stem cell line CGR8 during the first 10 days of differentiation into embryoid bodies	Factor.Value..Age.	4	10
GDS2819_individual_7_19_mod.txt	GEO	GDS2819	-1.66140158812	Homo sapiens	Leukemic white blood cells and various RNA preparation protocols	individual	patient 15	patient 26
GDS2819_individual_3_24_mod.txt	GEO	GDS2819	-2.05201783591	Homo sapiens	Leukemic white blood cells and various RNA preparation protocols	individual	patient 11	patient 6
GDS3113_tissue_2_26_mod.txt	GEO	GDS3113	1.27141946018	Homo sapiens	Various normal tissues	tissue	bone marrow	testis
E-GEOD-21515_27_1_6_mod.txt	ArrayExpress	E-GEOD-21515	1.23589226104	Mus musculus	Expression data from mouse ES and iPS cells	Factor.Value..CELL.LINE.	ESC2	R1
E-GEOD-22381_38_1_3_mod.txt	ArrayExpress	E-GEOD-22381	-7.02329361965	Mus musculus	Identification of downstream transcriptional targets of Dlx5 during early mouse inner ear (otocyst/otic vesicle) development	FactorValue..AGE.	4 days post-differentiation in-vitro	E10.5
GDS1209_tissue_10_23_mod.txt	GEO	GDS1209	-4.19591531625	Homo sapiens	Sarcoma and hypoxia	tissue	leiomyosarcoma	synovial
GDS2819_disease.state_2_4_mod.txt	GEO	GDS2819	1.35971177479	Homo sapiens	Leukemic white blood cells and various RNA preparation protocols	disease.state	ALL with t 1, 19	AML with normal karyotype and other abnormalities
GDS3113_tissue_6_12_mod.txt	GEO	GDS3113	1.60302207227	Homo sapiens	Various normal tissues	tissue	fetal kidney	lung
E-GEOD-34775_44_1_2_mod.txt	ArrayExpress	E-GEOD-34775	-3.06649783834	Mus musculus	Identification of genes characteristic of primary inguinal or epididymal preadipocyte fibroblasts	FactorValue..CELL.TYPE.	proliferating Epididymal Fat GFP- fibroblasts	proliferating Epididymal Fat Zfp423-GFP+ fibroblasts
E-GEOD-35416_34_1_5_mod.txt	ArrayExpress	E-GEOD-35416	1.16266663512	Mus musculus	Transcriptional profiling of mouse inner cell mass of the blastocyst	FactorValue..CELL.TYPE.	EGCs passage 19 cultured in LIF and Serum	MEFs passage 2 cultured in Serum
GDS2819_individual_3_23_mod.txt	GEO	GDS2819	-1.66162547838	Homo sapiens	Leukemic white blood cells and various RNA preparation protocols	individual	patient 11	patient 5
E-GEOD-37775_28_1_2_mod.txt	ArrayExpress	E-GEOD-37775	-1.33324564579	Mus musculus	Genome-wide characterization of menin-dependent H3K4me3 reveals a specific role for menin in the regulation of genes implicated in MEN1-like tumors (mRNA)	FactorValue..CELL.TYPE.	ES cell	ES cells were differentiated into pancreatic islet-like endocrine cells (PILECs)
GDS1376_cell.type_1_2_mod.txt	GEO	GDS1376	-3.06402574641	Homo sapiens	Essential thrombocythemia	cell.type	platelet	white blood cell
E-MEXP-1482_34_1_2_mod.txt	ArrayExpress	E-MEXP-1482	3.73341106996	Homo sapiens	Transcription profiling of human chronic lymphocytic leukemia samples and pRS-15/16 transfected MEG01 cell lines to identify MiR-15a and miR-16-1 cluster function in human leukemia	Factor.Value..genotype.		empty vector
E-GEOD-21515_27_2_5_mod.txt	ArrayExpress	E-GEOD-21515	-1.1082268711	Mus musculus	Expression data from mouse ES and iPS cells	Factor.Value..CELL.LINE.	IP14D-1	IP36D-3
E-GEOD-24705_38_3_11_mod.txt	ArrayExpress	E-GEOD-24705	-2.62637600353	Mus musculus	mRNA expression data from iPSCs	FactorValue..CELL.LINE.	iPS cell line iPSM1_8	ntiPS cell line ntiPSM2_4_3
GDS1962_tissue_1_3_mod.txt	GEO	GDS1962	1.13785798261	Homo sapiens	Glioma-derived stem cell factor effect on angiogenesis in the brain	tissue	not applicable	tumor grade III
E-GEOD-24207_47_6_14_mod.txt	ArrayExpress	E-GEOD-24207	1.49863025834	Mus musculus	mRNA analysis in different mouse tissues	FactorValue..TISSUE.	eye	pancreatic acini
GDS2671_time_3_4_mod.txt	GEO	GDS2671	-1.65316014237	Mus musculus	Embryonic V6.5 stem cell differentiation in vitro (MG-430A)	time	14 d	18 h
GDS3142_tissue_3_6_mod.txt	GEO	GDS3142	1.09450507799	Mus musculus	Various tissues	tissue	bone marrow	embryonic stem cells
E-GEOD-32967_39_1_3_mod.txt	ArrayExpress	E-GEOD-32967	3.41734810159	Homo sapiens	Modeling lethal prostate cancer variant with small cell carcinoma features [expression profile]	FactorValue..HISTOLOGIC.TYPE.	adenocarcinoma	small cell carcinoma

## Sheet: Concordant
Gene symbol	Description	# of experiments with CDKN2A	%concordant	Pearson Coef	Pearson p-val.
CDKN2A	cyclin-dependent kinase inhibitor 2A [Source:HGNC Symbol;Acc:1787]	669
CDKN2B	cyclin-dependent kinase inhibitor 2B (p15, inhibits CDK4) [Source:HGNC Symbol;Acc:1788]	273	87.1794871795	0.486439023866	4.94436798342e-41
CCNE1	cyclin E1 [Source:HGNC Symbol;Acc:1589]	224	79.4642857143	0.437323249639	1.264691415e-32
MTAP	methylthioadenosine phosphorylase [Source:HGNC Symbol;Acc:7413]	255	87.0588235294	0.429104417764	2.39776015181e-31
XPOT	exportin, tRNA (nuclear export receptor for tRNAs) [Source:HGNC Symbol;Acc:12826]	182	75.2747252747	0.422640597891	2.29286221186e-30
KPNA2	karyopherin alpha 2 (RAG cohort 1, importin alpha 1) [Source:HGNC Symbol;Acc:6395]	252	75.7936507937	0.419682653121	6.33957747961e-30
PRAME	preferentially expressed antigen in melanoma [Source:HGNC Symbol;Acc:9336]	224	82.5892857143	0.417790376558	1.20870812778e-29
MAGEC1	melanoma antigen family C, 1 [Source:HGNC Symbol;Acc:6812]	134	96.2686567164	0.413889150862	4.51354647489e-29
RACGAP1	Rac GTPase activating protein 1 [Source:HGNC Symbol;Acc:9804]	326	68.7116564417	0.402008598174	2.24536618053e-27
DNMT1	DNA (cytosine-5-)-methyltransferase 1 [Source:HGNC Symbol;Acc:2976]	291	72.1649484536	0.399573223546	4.90607146617e-27
KIF20A	kinesin family member 20A [Source:HGNC Symbol;Acc:9787]	316	71.5189873418	0.395761038591	1.64609684734e-26
MCM4	minichromosome maintenance complex component 4 [Source:HGNC Symbol;Acc:6947]	323	74.3034055728	0.395757393327	1.64799092818e-26
CSAG2	CSAG family, member 2 [Source:HGNC Symbol;Acc:16847]	129	95.3488372093	0.395650211631	1.70465650313e-26
BUB1B	budding uninhibited by benzimidazoles 1 homolog beta (yeast) [Source:HGNC Symbol;Acc:1149]	296	75.3378378378	0.38543617484	4.03938497719e-25
AREG	amphiregulin [Source:HGNC Symbol;Acc:651]	267	82.3970037453	0.382683584298	9.30220067634e-25
DDX31	DEAD (Asp-Glu-Ala-Asp) box polypeptide 31 [Source:HGNC Symbol;Acc:16715]	77	93.5064935065	0.376971990193	5.12116598319e-24
PCNA	proliferating cell nuclear antigen [Source:HGNC Symbol;Acc:8729]	284	71.4788732394	0.375967614638	6.88846140978e-24
H2AFZ	H2A histone family, member Z [Source:HGNC Symbol;Acc:4741]	222	69.3693693694	0.37077009694	3.14230559719e-23
BRCA2	breast cancer 2, early onset [Source:HGNC Symbol;Acc:1101]	238	70.1680672269	0.369045593884	5.16784075681e-23
PIGT	phosphatidylinositol glycan anchor biosynthesis, class T [Source:HGNC Symbol;Acc:14938]	139	86.3309352518	0.368014342898	6.94848834395e-23
PLK4	polo-like kinase 4 [Source:HGNC Symbol;Acc:11397]	283	75.6183745583	0.359336836459	8.04535540943e-22
PSAT1	phosphoserine aminotransferase 1 [Source:HGNC Symbol;Acc:19129]	354	65.5367231638	0.356818098861	1.61516327222e-21
FEN1	flap structure-specific endonuclease 1 [Source:HGNC Symbol;Acc:3650]	314	68.152866242	0.354267172512	3.25090082072e-21
EIF4EBP1	eukaryotic translation initiation factor 4E binding protein 1 [Source:HGNC Symbol;Acc:3288]	267	77.1535580524	0.354105308422	3.39771456501e-21
UCK2	uridine-cytidine kinase 2 [Source:HGNC Symbol;Acc:12562]	199	76.8844221106	0.353276690106	4.2581048339e-21
STC2	stanniocalcin 2 [Source:HGNC Symbol;Acc:11374]	273	78.021978022	0.352306847273	5.54096273687e-21
GTPBP4	GTP binding protein 4 [Source:HGNC Symbol;Acc:21535]	202	86.1386138614	0.352224096222	5.66663585508e-21
TIMP1	TIMP metallopeptidase inhibitor 1 [Source:HGNC Symbol;Acc:11820]	302	75.1655629139	0.352171051137	5.74866991691e-21
ETV4	ets variant 4 [Source:HGNC Symbol;Acc:3493]	253	78.2608695652	0.351778149256	6.3938895059e-21
PMAIP1	phorbol-12-myristate-13-acetate-induced protein 1 [Source:HGNC Symbol;Acc:9108]	391	78.0051150895	0.351195531197	7.48428554146e-21
ELAVL1	ELAV (embryonic lethal, abnormal vision, Drosophila)-like 1 (Hu antigen R) [Source:HGNC Symbol;Acc:3312]	224	70.5357142857	0.350867750983	8.17638052494e-21
NOLC1	nucleolar and coiled-body phosphoprotein 1 [Source:HGNC Symbol;Acc:15608]	211	79.6208530806	0.348991688756	1.35375352446e-20
EXO1	exonuclease 1 [Source:HGNC Symbol;Acc:3511]	319	70.8463949843	0.347986865155	1.77100424695e-20
CCNE2	cyclin E2 [Source:HGNC Symbol;Acc:1590]	223	81.1659192825	0.347819362612	1.85194892136e-20
MCM6	minichromosome maintenance complex component 6 [Source:HGNC Symbol;Acc:6949]	319	66.144200627	0.347068950728	2.2617242721e-20
CSAG1	chondrosarcoma associated gene 1 [Source:HGNC Symbol;Acc:24294]	67	97.0149253731	0.345654343687	3.29192593839e-20
LOX	lysyl oxidase [Source:HGNC Symbol;Acc:6664]	374	70.5882352941	0.342328424852	7.89663520414e-20
RANBP1	RAN binding protein 1 [Source:HGNC Symbol;Acc:9847]	194	81.9587628866	0.33920788369	1.77757013889e-19
CHEK1	checkpoint kinase 1 [Source:HGNC Symbol;Acc:1925]	297	71.3804713805	0.336952664041	3.17698436848e-19
YRDC	yrdC domain containing (E. coli) [Source:HGNC Symbol;Acc:28905]	146	84.9315068493	0.333095541133	8.48288833377e-19
TPBG	trophoblast glycoprotein [Source:HGNC Symbol;Acc:12004]	289	75.4325259516	0.331426140296	1.29206734743e-18
HSPA4	heat shock 70kDa protein 4 [Source:HGNC Symbol;Acc:5237]	266	75.5639097744	0.329755682642	1.96345359466e-18
SMC4	structural maintenance of chromosomes 4 [Source:HGNC Symbol;Acc:14013]	250	69.6	0.326513897626	4.39056620924e-18
ERH	enhancer of rudimentary homolog (Drosophila) [Source:HGNC Symbol;Acc:3447]	74	83.7837837838	0.32605904324	4.91160751587e-18
MIF	macrophage migration inhibitory factor (glycosylation-inhibiting factor) [Source:HGNC Symbol;Acc:7097]	185	70.2702702703	0.325645104009	5.43844013095e-18
SEC24D	SEC24 family, member D (S. cerevisiae) [Source:HGNC Symbol;Acc:10706]	220	67.2727272727	0.321878266416	1.36469306167e-17
PBK	PDZ binding kinase [Source:HGNC Symbol;Acc:18282]	320	66.25	0.321425482327	1.52295125698e-17
PLEKHA3	pleckstrin homology domain containing, family A (phosphoinositide binding specific) member 3 [Source:HGNC Symbol;Acc:14338]	83	75.9036144578	0.320142702906	2.07609806222e-17
NUP155	nucleoporin 155kDa [Source:HGNC Symbol;Acc:8063]	244	75.0	0.319974368608	2.16201112368e-17
SLC25A17	solute carrier family 25 (mitochondrial carrier; peroxisomal membrane protein, 34kDa), member 17 [Source:HGNC Symbol;Acc:10987]	111	72.0720720721	0.319923594363	2.18860516042e-17
CDCA3	cell division cycle associated 3 [Source:HGNC Symbol;Acc:14624]	300	71.6666666667	0.319569462376	2.38325820787e-17
KIF23	kinesin family member 23 [Source:HGNC Symbol;Acc:6392]	299	70.2341137124	0.318433585149	3.12988697021e-17
SS18	synovial sarcoma translocation, chromosome 18 [Source:HGNC Symbol;Acc:11340]	212	73.5849056604	0.317039086128	4.36660980328e-17
TPX2	TPX2, microtubule-associated, homolog (Xenopus laevis) [Source:HGNC Symbol;Acc:1249]	332	72.8915662651	0.315668038677	6.04767727991e-17
TXNDC	TXNDC	71	87.323943662	0.314038866291	8.88611488757e-17
C20ORF172	C20ORF172	102	87.2549019608	0.313850150106	9.28975363806e-17
BUB1	budding uninhibited by benzimidazoles 1 homolog (yeast) [Source:HGNC Symbol;Acc:1148]	310	71.2903225806	0.31342768157	1.0259890533e-16
AURKA	aurora kinase A [Source:HGNC Symbol;Acc:11393]	258	75.9689922481	0.313158772365	1.09286174241e-16
SOAT1	sterol O-acyltransferase 1 [Source:HGNC Symbol;Acc:11177]	260	72.6923076923	0.312635807562	1.23542214938e-16
RPP40	ribonuclease P/MRP 40kDa subunit [Source:HGNC Symbol;Acc:20992]	241	78.8381742739	0.312325411847	1.32852886034e-16
ST3GAL4	ST3 beta-galactoside alpha-2,3-sialyltransferase 4 [Source:HGNC Symbol;Acc:10864]	169	76.9230769231	0.311856250183	1.48250619256e-16
ZNF622	zinc finger protein 622 [Source:HGNC Symbol;Acc:30958]	44	86.3636363636	0.311550318769	1.59223239022e-16
TTK	TTK protein kinase [Source:HGNC Symbol;Acc:12401]	262	70.6106870229	0.31149424666	1.61319230622e-16
MAD2L1	MAD2 mitotic arrest deficient-like 1 (yeast) [Source:HGNC Symbol;Acc:6763]	318	69.8113207547	0.310924671316	1.84209151369e-16
MGC88118	MGC88118	50	96.0	0.310133458832	2.21387142695e-16
GNPDA2	glucosamine-6-phosphate deaminase 2 [Source:HGNC Symbol;Acc:21526]	182	70.3296703297	0.310056984962	2.25349501775e-16
CKS1B	CDC28 protein kinase regulatory subunit 1B [Source:HGNC Symbol;Acc:19083]	304	76.3157894737	0.309427666651	2.60717782369e-16
SRM	spermidine synthase [Source:HGNC Symbol;Acc:11296]	187	75.935828877	0.309167616452	2.76878476235e-16
DDX21	DEAD (Asp-Glu-Ala-Asp) box helicase 21 [Source:HGNC Symbol;Acc:2744]	244	76.6393442623	0.307995499049	3.62819527265e-16
EEF1E1	eukaryotic translation elongation factor 1 epsilon 1 [Source:HGNC Symbol;Acc:3212]	205	78.5365853659	0.306915421477	4.64951296165e-16
ECT2	epithelial cell transforming sequence 2 oncogene [Source:HGNC Symbol;Acc:3155]	305	69.5081967213	0.304689334222	7.72701113698e-16
CD109	CD109 molecule [Source:HGNC Symbol;Acc:21685]	225	74.6666666667	0.304000398354	9.03446332494e-16
GNL3	guanine nucleotide binding protein-like 3 (nucleolar) [Source:HGNC Symbol;Acc:29931]	171	80.701754386	0.303667668893	9.74151324781e-16
ZWINT	ZW10 interactor [Source:HGNC Symbol;Acc:13195]	347	71.469740634	0.303391659102	1.03690793473e-15
FLJ10534	FLJ10534	52	94.2307692308	0.303004963679	1.13156248567e-15
FLJ31461	FLJ31461	31	100.0	0.300205630448	2.1214394129e-15
CCNB1	cyclin B1 [Source:HGNC Symbol;Acc:1579]	361	65.9279778393	0.299412083026	2.53202594013e-15
MCM10	minichromosome maintenance complex component 10 [Source:HGNC Symbol;Acc:18043]	279	65.9498207885	0.298161409584	3.34262089222e-15
RAB11A	RAB11A, member RAS oncogene family [Source:HGNC Symbol;Acc:9760]	144	57.6388888889	0.297801782391	3.61961122404e-15
FLJ10884	FLJ10884	49	91.8367346939	0.297328609724	4.01864029117e-15
TP53TG3	TP53 target 3 [Source:HGNC Symbol;Acc:30759]	96	91.6666666667	0.295901877505	5.5019339798e-15
PDK3	pyruvate dehydrogenase kinase, isozyme 3 [Source:HGNC Symbol;Acc:8811]	210	68.0952380952	0.29563142774	5.83837792127e-15
PYCR1	pyrroline-5-carboxylate reductase 1 [Source:HGNC Symbol;Acc:9721]	233	75.9656652361	0.295581576519	5.90256241251e-15
CKS2	CDC28 protein kinase regulatory subunit 2 [Source:HGNC Symbol;Acc:2000]	305	73.4426229508	0.295254887301	6.34066956757e-15
CSTF2	cleavage stimulation factor, 3' pre-RNA, subunit 2, 64kDa [Source:HGNC Symbol;Acc:2484]	187	75.4010695187	0.294267260781	7.86857198962e-15
BMS1L	BMS1L	35	100.0	0.294143803705	8.08333919295e-15
LOC56902	LOC56902	36	100.0	0.293757838168	8.79257417583e-15
CALU	calumenin [Source:HGNC Symbol;Acc:1458]	232	71.1206896552	0.293603633539	9.09271213272e-15
RAE1	RAE1 RNA export 1 homolog (S. pombe) [Source:HGNC Symbol;Acc:9828]	188	80.8510638298	0.291583013193	1.40893677134e-14
AMOTL1	angiomotin like 1 [Source:HGNC Symbol;Acc:17811]	143	69.2307692308	0.29135956017	1.47853544216e-14
RHOBTB3	Rho-related BTB domain containing 3 [Source:HGNC Symbol;Acc:18757]	326	69.6319018405	0.291293467465	1.49976037221e-14
BTG3	BTG family, member 3 [Source:HGNC Symbol;Acc:1132]	198	70.7070707071	0.289081578564	2.41130091693e-14
HKE2	HKE2	41	97.5609756098	0.288644157199	2.64740953858e-14
BRIX	BRIX	78	80.7692307692	0.288545840009	2.70352310495e-14
KIAA0286	KIAA0286	55	96.3636363636	0.287340174804	3.49416784833e-14
PLAUR	plasminogen activator, urokinase receptor [Source:HGNC Symbol;Acc:9053]	327	72.7828746177	0.284470726619	6.40260677518e-14

## Sheet: Discordant
Gene symbol	Description	# of experiments with CDKN2A	%concordant	Pearson Coef	Pearson p-val.
CDKN2A	cyclin-dependent kinase inhibitor 2A [Source:HGNC Symbol;Acc:1787]	669
PPARGC1A	peroxisome proliferator-activated receptor gamma, coactivator 1 alpha [Source:HGNC Symbol;Acc:9237]	298	17.1140939597	-0.42557120422	8.28764782892e-31
ACOX2	acyl-CoA oxidase 2, branched chain [Source:HGNC Symbol;Acc:120]	263	23.1939163498	-0.394349368415	2.56685760811e-26
CRYL1	crystallin, lambda 1 [Source:HGNC Symbol;Acc:18246]	279	16.8458781362	-0.391362768274	6.52450661713e-26
NCALD	neurocalcin delta [Source:HGNC Symbol;Acc:7655]	288	20.4861111111	-0.386804035055	2.66076233745e-25
HAO2	hydroxyacid oxidase 2 (long chain) [Source:HGNC Symbol;Acc:4810]	151	15.8940397351	-0.376155261218	6.51780745679e-24
BRP44L	brain protein 44-like [Source:HGNC Symbol;Acc:21606]	208	11.0576923077	-0.374553442986	1.04387068675e-23
CBX7	chromobox homolog 7 [Source:HGNC Symbol;Acc:1557]	202	29.702970297	-0.370972004208	2.96391860843e-23
PPARA	peroxisome proliferator-activated receptor alpha [Source:HGNC Symbol;Acc:9232]	234	26.9230769231	-0.369446171666	4.60508479556e-23
MSRA	methionine sulfoxide reductase A [Source:HGNC Symbol;Acc:7377]	169	16.5680473373	-0.369324773389	4.76891544643e-23
PCSK5	proprotein convertase subtilisin/kexin type 5 [Source:HGNC Symbol;Acc:8747]	252	29.7619047619	-0.360511346282	5.80068664686e-22
SLC38A3	solute carrier family 38, member 3 [Source:HGNC Symbol;Acc:18044]	145	12.4137931034	-0.357235832785	1.43947938697e-21
SHANK2	SH3 and multiple ankyrin repeat domains 2 [Source:HGNC Symbol;Acc:14295]	252	24.2063492063	-0.354485154932	3.06303683825e-21
NMNAT3	nicotinamide nucleotide adenylyltransferase 3 [Source:HGNC Symbol;Acc:20989]	136	22.0588235294	-0.348911352738	1.38319598506e-20
CDH5	cadherin 5, type 2 (vascular endothelium) [Source:HGNC Symbol;Acc:1764]	231	28.5714285714	-0.346340468572	2.74466406403e-20
FGL2	fibrinogen-like 2 [Source:HGNC Symbol;Acc:3696]	292	30.1369863014	-0.340930950496	1.13695927092e-19
MSRB2	methionine sulfoxide reductase B2 [Source:HGNC Symbol;Acc:17061]	248	33.8709677419	-0.338248373242	2.27707290425e-19
FXYD1	FXYD domain containing ion transport regulator 1 [Source:HGNC Symbol;Acc:4025]	251	25.4980079681	-0.335391195977	4.73600260492e-19
KDR	kinase insert domain receptor (a type III receptor tyrosine kinase) [Source:HGNC Symbol;Acc:6307]	225	23.5555555556	-0.33274036014	9.27935464271e-19
EMCN	endomucin [Source:HGNC Symbol;Acc:16041]	276	27.5362318841	-0.330982185306	1.44442173945e-18
GUCY1B3	guanylate cyclase 1, soluble, beta 3 [Source:HGNC Symbol;Acc:4687]	310	34.5161290323	-0.330214205808	1.75084473006e-18
SLC4A4	solute carrier family 4, sodium bicarbonate cotransporter, member 4 [Source:HGNC Symbol;Acc:11030]	327	31.498470948	-0.327164045249	3.73907023104e-18
MAP2K6	mitogen-activated protein kinase kinase 6 [Source:HGNC Symbol;Acc:6846]	173	22.5433526012	-0.323227711932	9.82969118712e-18
SERPING1	serpin peptidase inhibitor, clade G (C1 inhibitor), member 1 [Source:HGNC Symbol;Acc:1228]	327	38.8379204893	-0.323225960701	9.83388809093e-18
DTNA	dystrobrevin, alpha [Source:HGNC Symbol;Acc:3057]	278	33.8129496403	-0.320568195611	1.87363903406e-17
GPLD1	glycosylphosphatidylinositol specific phospholipase D1 [Source:HGNC Symbol;Acc:4459]	186	19.3548387097	-0.320203721063	2.04579345936e-17
LMBRD1	LMBR1 domain containing 1 [Source:HGNC Symbol;Acc:23038]	131	16.7938931298	-0.313019556794	1.12914830103e-16
ADHFE1	alcohol dehydrogenase, iron containing, 1 [Source:HGNC Symbol;Acc:16354]	180	35.0	-0.309509008278	2.55856026099e-16
SEMA4A	sema domain, immunoglobulin domain (Ig), transmembrane domain (TM) and short cytoplasmic domain, (semaphorin) 4A [Source:HGNC Symbol;Acc:10729]	221	20.3619909502	-0.3083507495	3.3432105244e-16
NCOA1	nuclear receptor coactivator 1 [Source:HGNC Symbol;Acc:7668]	227	23.7885462555	-0.305493184658	6.43529217604e-16
TMEM38A	transmembrane protein 38A [Source:HGNC Symbol;Acc:28462]	136	16.9117647059	-0.305374578614	6.61158203688e-16

## Sheet: Concordant KEGG pathways
Group	P-value
hsa04110:Cell cycle	1.80937923071e-10
hsa04115:p53 signaling pathway	5.91754098863e-05
hsa03030:DNA replication	0.00538265708187
hsa04114:Oocyte meiosis	0.00559772679702
hsa03320:PPAR signaling pathway	0.00672176784303
hsa05200:Pathways in cancer	0.0445388856039
hsa00270:Cysteine and methionine metabolism	0.0474253431033

## Sheet: Concordant COG Ontology
Group	P-value

## Sheet: Concordant TISSUE
Group	P-value
Placenta	0.00061238569907
Liver	0.00171164262773
Plasma	0.00188753911075
Serum	0.00638798561234
Skeletal muscle	0.010585140707
Lung	0.0168512309125
Colon	0.0231300027497
Brain	0.0300537660975
Hepatoma	0.0306219646383
Epithelium	0.0474870447823
