# Supplementary material for: The CO-Regulation Database (CORD): A Tool to Identify Coordinately Expressed Genes
Source: PLoS One. 2014 Mar 5;9(3):e90408. doi: 10.1371/journal.pone.0090408 (PMC3944024; doi:10.1371/journal.pone.0090408)
Supplement: File S2 — An Excel file (VIM.xls)containing the CORD results for VIM using the following settings: human and mouse experiments used, p value of less than 0.01, fold change threshold of greater than 2, tissue comparisions included, and the minimum number of samples per experiment is 3. (XLS) [file pone.0090408.s003.xls]

## Sheet: Experiments
CordID	Database	Datbase ID	Fold Change	Species	Title	Factor	Group 1	Group 2
E-GEOD-16461_44_1_3_mod.txt	ArrayExpress	E-GEOD-16461	-1.36010461658	Homo sapiens	Gene expression profile in CD4+ and CD8+ T cells from identical twins discordant for Multiple sclerosis	FactorValue..TWIN.	P	T
E-MEXP-1976_23_2_5_mod.txt	ArrayExpress	E-MEXP-1976	2.08694058326	Mus musculus	Transcription profiling of Mixl1 heterozygous or null mouse embryonic stem cells to identify downstream transcriptional targets during early development	Factor.Value..TIME.	2.8	6
E-GEOD-19403_33_1_2_mod.txt	ArrayExpress	E-GEOD-19403	1.05703755067	Mus musculus	Dysregulation of the Wnt pathway inhibits timely myelination and remyelination in the mammalian CNS	FactorValue..DEVELOPMENTAL.STAGE.	Day 15	Day 4
GDS3113_tissue_15_22_mod.txt	GEO	GDS3113	3.15868476501	Homo sapiens	Various normal tissues	tissue	pancreas	skin
GDS1962_tissue_3_4_mod.txt	GEO	GDS1962	1.26037427536	Homo sapiens	Glioma-derived stem cell factor effect on angiogenesis in the brain	tissue	tumor grade III	tumor grade IV
E-GEOD-21278_33_1_12_mod.txt	ArrayExpress	E-GEOD-21278	-2.88318422631	Mus musculus	A genomic atlas of mouse hypothalamic development	Factor.Value..AGE.	embryonic day 10	postnatal day 42
GDS63_time_2_9_mod.txt	GEO	GDS63	1.60008600157	Rattus norvegicus	Spinal cord injury and regeneration time course: at T9 (RG-U34A)	time	0.5 h	3 d
E-GEOD-37290_32_1_3_mod.txt	ArrayExpress	E-GEOD-37290	-4.05902523528	Homo sapiens	Expression Data from HNF1b-knockdown RMG2-ovarian cancer cells	FactorValue..TRANSFECTED.WITH.	HNF1b-targeting shRNA (clones V2LHS_196459)	non-silencing control
E-GEOD-20505_26_1_3_mod.txt	ArrayExpress	E-GEOD-20505	-3.67034187098	Homo sapiens	Transcription profilin by array of human CD34+ hematopoietic progenitor cells grown under different conditions	Factor.Value..CULTURE.CONDITIONS.	none	S2 stimulation (British trial conditions)
E-GEOD-30922_39_1_2_mod.txt	ArrayExpress	E-GEOD-30922	-1.91619789844	Mus musculus	Chemokines regulate small leucine-rich proteoglycans in the extracellular matrix of the pressure-overloaded right ventricle	FactorValue..SAMPLE.TYPE.	pulmonary banding	sham operated
E-GEOD-20667_35_4_5_mod.txt	ArrayExpress	E-GEOD-20667	2.71262622551	Homo sapiens	The Notch/Hes1 pathway sustains NF-B activation through CYLD repression in T cell leukemia	FactorValue..CELL.LINE.	JCRB0086 [TALL-1]	KOPT-K
E-MEXP-2426_26_2_4_mod.txt	ArrayExpress	E-MEXP-2426	2.33491416494	Homo sapiens	Transcription profiling of human embryonic stem cells and neuroepithelial cells	Factor.Value..TIME.	6	17
E-GEOD-32966_37_4_7_mod.txt	ArrayExpress	E-GEOD-32966	-1.78420329994	Mus musculus	Dermal reprogramming through epidermal activation of beta-catenin	FactorValue..SORTED.CELL.POPULATION.	GFP+ transient activated D2 dermal fibroblasts	ItgA6+ telogen epidermal keratinocytes
GDS3142_tissue_1_22_mod.txt	GEO	GDS3142	-2.10967514247	Mus musculus	Various tissues	tissue	adipose tissue	thymus
GDS1290_time_1_2_mod.txt	GEO	GDS1290	1.63570185428	Homo sapiens	CD4+ lymphocyte polarization into Th1 and Th2 cells in the presence of TGFbeta: time course (HG-U95A)	time	0 h	2 h
E-GEOD-36643_30_1_3_mod.txt	ArrayExpress	E-GEOD-36643	1.6157528896	Homo sapiens	Ganglioside GD2 identifies Breast Cancer Stem Cells: Targeting GD3 Synthase Inhibits GD2 Expression and Tumor Growth	FactorValue..FACS.SORTED.CELL.POPULATION.	CD24_high	GD2-
E-GEOD-9894_31_1_2_mod.txt	ArrayExpress	E-GEOD-9894	4.75059425111	Homo sapiens	Transcription profiling of human culture-amplified and native bone marrow mesenchymal stem cells to characterize specific plasma membrane protein phenotype	Factor.Value.cell.type.	erythropoietic	granulopoietic
GDS1280_tissue_1_2_mod.txt	GEO	GDS1280	1.53658166581	Rattus norvegicus	Age effect on central and peripheral nervous systems	tissue	oculomotor nucleus	spinal cord
GDS3142_tissue_11_14_mod.txt	GEO	GDS3142	4.41538399516	Mus musculus	Various tissues	tissue	liver	ovary
GDS3113_tissue_11_24_mod.txt	GEO	GDS3113	2.97334294162	Homo sapiens	Various normal tissues	tissue	liver	spinal cord
E-GEOD-21447_43_6_7_mod.txt	ArrayExpress	E-GEOD-21447	-2.1850719135	Mus musculus	A global expression switch marks pachytene initiation during mouse male meiosis	FactorValue..MEIOTIC.FRACTION.	pre-leptotene	round spermatids
GDS63_time_8_10_mod.txt	GEO	GDS63	-1.11324815246	Rattus norvegicus	Spinal cord injury and regeneration time course: at T9 (RG-U34A)	time	2 d	4 h
E-GEOD-17906_35_1_2_mod.txt	ArrayExpress	E-GEOD-17906	1.86445784554	Homo sapiens	Transcription profiling by array of human CD90 positive prostate stromal fibromuscular tumor cells	Factor.Value.cell.type.		CD13 positive
E-GEOD-31638_39_1_4_mod.txt	ArrayExpress	E-GEOD-31638	-1.53280515896	Mus musculus	Expression data from primary hepatocytes knocking down or overexpressing IRE1a	FactorValue..GENOTYPE.VARIATION.	EGFP overexpression as control	IRE1aS724A overexpression
E-GEOD-33425_32_1_2_mod.txt	ArrayExpress	E-GEOD-33425	-1.39978821241	Homo sapiens	Human MAIT and CD8++ cell development	FactorValue..ORGANISM.PART.	CD8+ T cell	peripheral blood
E-GEOD-24207_47_2_13_mod.txt	ArrayExpress	E-GEOD-24207	3.26924364095	Mus musculus	mRNA analysis in different mouse tissues	FactorValue..TISSUE.	adrenal gland	ovary
GDS2819_individual_15_26_mod.txt	GEO	GDS2819	3.44608451974	Homo sapiens	Leukemic white blood cells and various RNA preparation protocols	individual	patient 22	patient 8
GDS2666_time_3_7_mod.txt	GEO	GDS2666	-2.54112952455	Mus musculus	Embryonic R1 stem cell differentiation in vitro (MG-430A)	time	14 d	48 h
GDS589_tissue_3_4_mod.txt	GEO	GDS589	-1.84874761009	Rattus norvegicus	Multiple normal tissue gene expression across strains	tissue	bone marrow	cerebellum
E-GEOD-27547_35_1_3_mod.txt	ArrayExpress	E-GEOD-27547	2.1221975022	Mus musculus	Gene expression differences in mouse islets after isolation at different time points (0-48hr)	FactorValue..TIME.AFTER.ISOLATION.	0 hr	48 hr
E-TABM-717_24_1_4_mod.txt	ArrayExpress	E-TABM-717	3.09244836379	Mus musculus	Transcription profiling of mouse embryonic stem cells in vitro - FunGenES: IMM-1: Neural Differentiation of Embryonic Stem Cells in vitro: a Road Map to Neurogenesis in the Embryo	Factor.Value..Age.	0	4
E-GEOD-20614_35_1_3_mod.txt	ArrayExpress	E-GEOD-20614	-1.11750563456	Mus musculus	Gene expression profiling of mouse tumors arising from Keratin 6-positive mammary cells	FactorValue..TRANSGENIC.	K6-tva RCAS-PyMT	MMTV-tva RCAS-PyMT
E-GEOD-30138_43_4_5_mod.txt	ArrayExpress	E-GEOD-30138	-1.7823500942	Mus musculus	Global Gene Expression Analysis of Murine Limb Development	FactorValue..DEVELOPMENTAL.STAGE.	E13.5	E9.5
E-GEOD-17906_35_3_4_mod.txt	ArrayExpress	E-GEOD-17906	3.48950810779	Homo sapiens	Transcription profiling by array of human CD90 positive prostate stromal fibromuscular tumor cells	Factor.Value.cell.type.	CD26 positive	CD49a positive
GDS1490_tissue_26_29_mod.txt	GEO	GDS1490	-1.84146599824	Mus musculus	Neural tissue profiling	tissue	retina	spleen
E-GEOD-20667_35_2_4_mod.txt	ArrayExpress	E-GEOD-20667	-2.96610397826	Homo sapiens	The Notch/Hes1 pathway sustains NF-B activation through CYLD repression in T cell leukemia	FactorValue..CELL.LINE.	ACC525 [DND41]	JCRB0086 [TALL-1]
GDS589_tissue_4_18_mod.txt	GEO	GDS589	-2.55543680615	Rattus norvegicus	Multiple normal tissue gene expression across strains	tissue	cerebellum	nucleus accumbens core
E-GEOD-33425_31_1_3_mod.txt	ArrayExpress	E-GEOD-33425	1.37408814896	Homo sapiens	Human MAIT and CD8++ cell development	FactorValue..CELL.TYPE.	CD161++CD8aa T cells	not specified
GDS2819_individual_3_8_mod.txt	GEO	GDS2819	4.73689801276	Homo sapiens	Leukemic white blood cells and various RNA preparation protocols	individual	patient 11	patient 16
GDS3142_tissue_13_18_mod.txt	GEO	GDS3142	-1.02488738258	Mus musculus	Various tissues	tissue	muscle	seminal vesicle
E-GEOD-27973_41_1_4_mod.txt	ArrayExpress	E-GEOD-27973	2.31043711371	Homo sapiens	Human airway epithelial responses to rhinovirus infection and cigarette smoke extract alone and in combination	FactorValue..DONOR.	1	4
E-MEXP-2320_39_2_3_mod.txt	ArrayExpress	E-MEXP-2320	2.95704987683	Mus musculus	Transcription profiling of mouse long-lived S6K1 -/- strain females compared to wild types	Factor.Value.OrganismPart.	liver	muscle
E-GEOD-29618_37_1_4_mod.txt	ArrayExpress	E-GEOD-29618	1.53804422685	Homo sapiens	FACS-sorted cells from Young Adults Vaccinated with Influenza TIV or LAIV Vaccines during 2008/09 Flu Season	FactorValue..CELL.TYPE.	Bcells	pDC
GDS589_tissue_5_21_mod.txt	GEO	GDS589	1.9432043386	Rattus norvegicus	Multiple normal tissue gene expression across strains	tissue	cerebral cortex	pineal
GDS589_tissue_5_30_mod.txt	GEO	GDS589	-1.63456843927	Rattus norvegicus	Multiple normal tissue gene expression across strains	tissue	cerebral cortex	ventral tegmental area
E-GEOD-29318_35_1_3_mod.txt	ArrayExpress	E-GEOD-29318	-1.91699362475	Mus musculus	Expression profile of FAC-sorted murine retinal cells	FactorValue..CELL.TYPE.	nestinGFP positive retinal cell	rhoGFP positive retinal cell
E-GEOD-35366_37_1_3_mod.txt	ArrayExpress	E-GEOD-35366	-3.48351842652	Mus musculus	Global developmental gene expression and pathway analysis of normal brain development and mouse models of human neuronal migration defects	FactorValue..AGE.	E14	P14
E-GEOD-20505_23_1_2_mod.txt	ArrayExpress	E-GEOD-20505	-3.95446106485	Homo sapiens	Transcription profilin by array of human CD34+ hematopoietic progenitor cells grown under different conditions	Factor.Value..TREATMENT.TIME.	0	48
E-GEOD-26408_33_4_5_mod.txt	ArrayExpress	E-GEOD-26408	-5.07282806603	Mus musculus	Signatures of murine B-cell development implicate Yy1 as a regulator of the germinal center-specific program	FactorValue..CELL.TYPE.	Purified Marginal Zone (Cd19-positive/Cd21-high/Cd23-low) B-cells	Purified Plasma cells (B220-low/Cd138-positive/Cd93-negative)
E-GEOD-24207_47_1_17_mod.txt	ArrayExpress	E-GEOD-24207	-1.9709534933	Mus musculus	mRNA analysis in different mouse tissues	FactorValue..TISSUE.	adipose tissue	placenta
GDS2841_tissue_1_5_mod.txt	GEO	GDS2841	-1.8886367487	Rattus norvegicus	Alcohol-preferring inbred strain: brain	tissue	accumbens	hippocampus
GDS2973_age_1_2_mod.txt	GEO	GDS2973	-1.3311282466	Mus musculus	Vitamin E supplementation effect on aged brain	age	30 mo	5 mo
E-GEOD-24207_47_14_16_mod.txt	ArrayExpress	E-GEOD-24207	1.52541927593	Mus musculus	mRNA analysis in different mouse tissues	FactorValue..TISSUE.	pancreatic acini	pituitary gland
GDS3089_agent_1_2_mod.txt	GEO	GDS3089	-3.18024078506	Homo sapiens	Tretinoin effect on promyelocytic leukemia cell line	agent	control	tretinoin
GDS2055_individual_4_6_mod.txt	GEO	GDS2055	-1.83374657571	Homo sapiens	Skeletal muscle types (HG-U133A)	individual	4	6
E-GEOD-28799_40_1_2_mod.txt	ArrayExpress	E-GEOD-28799	4.65723731454	Homo sapiens	Isolation and characterization of stem-like cells from a human ovarian cancer cell line	FactorValue..CULTURE.TYPE.	adherent culture	suspension culture
E-GEOD-29328_32_3_5_mod.txt	ArrayExpress	E-GEOD-29328	-2.56994017563	Mus musculus	Expression data from squamous cell carcinoma stem cells	FactorValue..GENOTYPE.	K14cre;TbRII(fl/fl);FAK(fl/fl)	wild type
E-GEOD-21278_33_4_7_mod.txt	ArrayExpress	E-GEOD-21278	-1.17568762597	Mus musculus	A genomic atlas of mouse hypothalamic development	Factor.Value..AGE.	embryonic day 13	embryonic day 16
E-GEOD-9894_31_1_3_mod.txt	ArrayExpress	E-GEOD-9894	4.33634746344	Homo sapiens	Transcription profiling of human culture-amplified and native bone marrow mesenchymal stem cells to characterize specific plasma membrane protein phenotype	Factor.Value.cell.type.	erythropoietic	hematopoietic
GDS3142_tissue_12_19_mod.txt	GEO	GDS3142	-2.41954007013	Mus musculus	Various tissues	tissue	lung	small intestine
GDS2841_tissue_1_4_mod.txt	GEO	GDS2841	-1.09479520911	Rattus norvegicus	Alcohol-preferring inbred strain: brain	tissue	accumbens	frontal cortex
E-MEXP-955_50_1_4_mod.txt	ArrayExpress	E-MEXP-955	-2.21683226103	Mus musculus	Transcription profiling of mouse embryonic stem cells	Factor.Value..organism.part.	embryonic stem cells	inner cell mass
GDS3113_tissue_3_12_mod.txt	GEO	GDS3113	1.50963909638	Homo sapiens	Various normal tissues	tissue	brain	lung
E-GEOD-20577_37_1_2_mod.txt	ArrayExpress	E-GEOD-20577	3.23159230825	Mus musculus	Gestational taurine supplementation of mice: effect on offspring gene expression in liver and skeletal muscle	FactorValue..TISSUE.	liver	quadriceps muscle
GDS3113_tissue_6_20_mod.txt	GEO	GDS3113	-1.70357844838	Homo sapiens	Various normal tissues	tissue	fetal kidney	salivary gland
GDS3142_tissue_8_20_mod.txt	GEO	GDS3142	-1.5314726546	Mus musculus	Various tissues	tissue	fetus	spleen
GDS3113_tissue_4_12_mod.txt	GEO	GDS3113	2.07960031568	Homo sapiens	Various normal tissues	tissue	colon	lung
E-MEXP-2360_27_3_5_mod.txt	ArrayExpress	E-MEXP-2360	-3.11856577064	Homo sapiens	Transcription profiling of human memory B cells to plasma cells differentiation time course	Factor.Value.CELL_TYPE.	memory B cells	plasma cells
GDS3142_tissue_4_7_mod.txt	GEO	GDS3142	3.48273623525	Mus musculus	Various tissues	tissue	brain	eye
E-GEOD-13093_28_2_5_mod.txt	ArrayExpress	E-GEOD-13093	-2.14186690214	Mus musculus	Feeding schedule and the circadian clock shape rhythms in hepatic gene expression	FactorValue..STRAIN.OR.LINE.	C57/B6, Gender: male, Age: 8-12 weeks, Condition: Fasted	Cry1,Cry2 double KO mice, Gender: male, Age: 8-16 weeks, Condition: ad libitum food availability
E-GEOD-24207_47_2_14_mod.txt	ArrayExpress	E-GEOD-24207	-2.97395347468	Mus musculus	mRNA analysis in different mouse tissues	FactorValue..TISSUE.	adrenal gland	pancreatic acini
E-GEOD-35366_37_2_3_mod.txt	ArrayExpress	E-GEOD-35366	-2.18191883866	Mus musculus	Global developmental gene expression and pathway analysis of normal brain development and mouse models of human neuronal migration defects	FactorValue..AGE.	P0	P14
GDS2159_time_5_6_mod.txt	GEO	GDS2159	1.40705231115	Mus musculus	Spinal cord injury model: time course	time	4 h	72 h
E-GEOD-21278_33_7_11_mod.txt	ArrayExpress	E-GEOD-21278	-2.28662085592	Mus musculus	A genomic atlas of mouse hypothalamic development	Factor.Value..AGE.	embryonic day 16	postnatal day 21
GDS3113_tissue_1_2_mod.txt	GEO	GDS3113	1.33861906694	Homo sapiens	Various normal tissues	tissue	adrenal gland	bone marrow
E-GEOD-17553_83_1_2_mod.txt	ArrayExpress	E-GEOD-17553	2.58156066452	Mus musculus	Estradiol or Testosterone treated efferent duct and caput epididymis	FactorValue..TISSUE.	Caput epididymis	Efferent duct
E-MEXP-563_32_3_5_mod.txt	ArrayExpress	E-MEXP-563	1.08486104115	Homo sapiens	Transcription profiling of human mesenchymal stem cells transformed with lentiviral vectors of TERT, E6, SV40 and RAS	Factor.Value..transfect.	hTERT/HPVE6/HPVE7	hTERT/HPVE6/HPVE7/SV40t/hRas
GDS3142_tissue_12_22_mod.txt	GEO	GDS3142	-1.10970510094	Mus musculus	Various tissues	tissue	lung	thymus
E-GEOD-22506_20_2_3_mod.txt	ArrayExpress	E-GEOD-22506	4.39647334324	Mus musculus	Unacylated Ghrelin Rapidly Modulates Lipogenic and Insulin Signaling Pathway Gene Expression in Metabolically Active Tissues of GHSR Deleted Mice	Factor.Value..TISSUE.	Liver	Skeletal muscle (M. vastus lateralis)
E-GEOD-18281_36_1_3_mod.txt	ArrayExpress	E-GEOD-18281	-1.0010368679	Mus musculus	Spatial mapping of thymic stromal microenvironments reveals unique features influencing T lymphoid differentiation	FactorValue..TISSUE.	Central cortex	Peri-medullary cortex
E-GEOD-14519_33_3_4_mod.txt	ArrayExpress	E-GEOD-14519	1.066570249	Homo sapiens	Transcription profiling by array of human multiple myeloma cell lines after treatment with arsenic	Factor.Value.cell.line.	MM.1s	U266
E-GEOD-19402_34_3_5_mod.txt	ArrayExpress	E-GEOD-19402	1.11839720664	Mus musculus	Gene expression data from hippocampus	FactorValue..TISSUE.TYPE.	Drd2-MSNs	hypothalamus
E-GEOD-24207_47_20_21_mod.txt	ArrayExpress	E-GEOD-24207	2.21517211671	Mus musculus	mRNA analysis in different mouse tissues	FactorValue..TISSUE.	small intestine	spleen
GDS3113_tissue_1_15_mod.txt	GEO	GDS3113	-1.28813944	Homo sapiens	Various normal tissues	tissue	adrenal gland	pancreas
GDS3113_tissue_11_13_mod.txt	GEO	GDS3113	2.68746388608	Homo sapiens	Various normal tissues	tissue	liver	mammary gland
E-GEOD-32966_37_1_8_mod.txt	ArrayExpress	E-GEOD-32966	-2.16547999548	Mus musculus	Dermal reprogramming through epidermal activation of beta-catenin	FactorValue..SORTED.CELL.POPULATION.	GFP+ neonatal dermal fibroblasts	ItgA6+ transient activated D2 epidermal keratinocytes
E-MEXP-70_32_1_2_mod.txt	ArrayExpress	E-MEXP-70	-1.94521747942	Homo sapiens	Transcription profiling by array of human primary CD30+/CD38lo cells differentiating along the megakaryocyte lineage	FactorValue.SAMPLING.TIME.POINT.	Day0	Day10
GDS3113_tissue_10_22_mod.txt	GEO	GDS3113	1.93432318779	Homo sapiens	Various normal tissues	tissue	kidney	skin
E-GEOD-18649_37_2_3_mod.txt	ArrayExpress	E-GEOD-18649	-2.8728708611	Mus musculus	Molecular Profiling of the Developing Axial Skeleton: A role for Tgfbr2 in the Development of the Intervertebral Disc.	FactorValue..TISSUE.	not specified	Vertebrae
E-GEOD-11238_25_1_2_mod.txt	ArrayExpress	E-GEOD-11238	-1.77630063512	Homo sapiens	Transcription profiling by array of HeLa cells infected with vaccinia virus mutant for E3L	Factor.Value.time.	2	6
E-GEOD-26830_37_1_2_mod.txt	ArrayExpress	E-GEOD-26830	1.43314304104	Mus musculus	Dual functions of Tet1 in transcriptional regulation in mouse embryonic stem cells (mRNA)	FactorValue..OVEREXPRESSION.	Nanog	none
E-MEXP-2426_26_1_4_mod.txt	ArrayExpress	E-MEXP-2426	1.79398074047	Homo sapiens	Transcription profiling of human embryonic stem cells and neuroepithelial cells	Factor.Value..TIME.	0	17
E-GEOD-22798_36_1_2_mod.txt	ArrayExpress	E-GEOD-22798	2.72113140535	Mus musculus	Expression data from Pax7+ satellite cell derived tumors in vitro and in vivo	FactorValue..SAMPLE.TYPE.	normal muscle as control for myogenic tumors	tumors derived from CSM4B cells transformed in vitro
GDS589_tissue_5_27_mod.txt	GEO	GDS589	2.21377932202	Rattus norvegicus	Multiple normal tissue gene expression across strains	tissue	cerebral cortex	spleen
E-GEOD-18281_36_3_4_mod.txt	ArrayExpress	E-GEOD-18281	4.44360638938	Mus musculus	Spatial mapping of thymic stromal microenvironments reveals unique features influencing T lymphoid differentiation	FactorValue..TISSUE.	Peri-medullary cortex	Sub-capsular cortex
GDS968_individual_15_40_mod.txt	GEO	GDS968	-3.27525071783	Homo sapiens	Radiation therapy toxicity association with abnormal transcriptional response to DNA damage	individual	NoCa9	RadS7
E-GEOD-25029_43_1_2_mod.txt	ArrayExpress	E-GEOD-25029	-2.21755246538	Mus musculus	Ionizing radiation in GI tract of Tweak KO mice	FactorValue..TISSUE.	colon	jejunum
E-GEOD-15543_31_1_2_mod.txt	ArrayExpress	E-GEOD-15543	-1.59957256127	Homo sapiens	Transcription profiling by array of human pancreatic islet cells after in vitro expansion	Factor.Value.growth.condition.	expanded cell culture	freshly isolated cells
E-GEOD-21419_36_1_4_mod.txt	ArrayExpress	E-GEOD-21419	1.67141030971	Mus musculus	Laser Capture Microdissection of Hyperlipidemic Mouse Aorta Atherosclerosis	FactorValue..ORGANISM.PART.	adventitia of abdominal aorta	atherosclerotic lesion of abdominal aorta
GDS3142_tissue_16_17_mod.txt	GEO	GDS3142	-1.56528582131	Mus musculus	Various tissues	tissue	placenta	salivary gland
E-GEOD-15268_43_1_2_mod.txt	ArrayExpress	E-GEOD-15268	-1.11485087558	Mus musculus	Cell-context dependent Notch target genes	FactorValue..CHX.	-	+
E-MEXP-955_44_1_3_mod.txt	ArrayExpress	E-MEXP-955	-1.53702562434	Mus musculus	Transcription profiling of mouse embryonic stem cells	Factor.Value..cell.type.	embryonic stem cell	epiblast stem cells (EpiSC)
E-GEOD-24207_47_9_23_mod.txt	ArrayExpress	E-GEOD-24207	2.41368253049	Mus musculus	mRNA analysis in different mouse tissues	FactorValue..TISSUE.	kidney	thymus
E-MEXP-2197_25_1_2_mod.txt	ArrayExpress	E-MEXP-2197	-1.15625008787	Homo sapiens	shRNA profiling of human T-ALL cell lines - inhibition of TAL1 and NKX3.1 in T-ALL	Factor.Value..CELL_LINE.	HSB2	Jurkat
GDS1023_species_1_2_mod.txt	GEO	GDS1023	2.71626829938	Homo sapiens	6	Homo sapiens	Capra hircus	Capra hircus
E-GEOD-24207_47_10_23_mod.txt	ArrayExpress	E-GEOD-24207	3.39229242642	Mus musculus	mRNA analysis in different mouse tissues	FactorValue..TISSUE.	liver	thymus
E-GEOD-26370_38_1_2_mod.txt	ArrayExpress	E-GEOD-26370	6.77674867061	Homo sapiens	The gene expression response of MCF7 and MDAMB231 to glutamine deprivation	FactorValue..CELL.LINE.	MCF7	MDAMB231
GDS3142_tissue_4_6_mod.txt	GEO	GDS3142	1.85923707291	Mus musculus	Various tissues	tissue	brain	embryonic stem cells
GDS3113_tissue_20_30_mod.txt	GEO	GDS3113	1.50446587483	Homo sapiens	Various normal tissues	tissue	salivary gland	trachea
E-GEOD-34053_35_1_3_mod.txt	ArrayExpress	E-GEOD-34053	-6.07404610113	Homo sapiens	CD133+ colon cancer cells are more interactive with the tumor microenvironment than CD133- cells	FactorValue..CELL.TYPE.	carcinoma associated fibroblast	CD133+ carcinoma cell
GDS2819_individual_5_19_mod.txt	GEO	GDS2819	2.02843093628	Homo sapiens	Leukemic white blood cells and various RNA preparation protocols	individual	patient 13	patient 26
E-GEOD-32967_39_2_3_mod.txt	ArrayExpress	E-GEOD-32967	-2.49273449266	Homo sapiens	Modeling lethal prostate cancer variant with small cell carcinoma features [expression profile]	FactorValue..HISTOLOGIC.TYPE.	large cell neuroendocrine carcinoma	small cell carcinoma
E-GEOD-18586_40_1_3_mod.txt	ArrayExpress	E-GEOD-18586	-1.278837765	Mus musculus	Saturated fat stimulates obesity and hepatic steatosis and affects gut microbiota composition by an enhanced overflow of dietary fat to the distal intestine	FactorValue..ORGANISM.PART.	small intestine, SI 1	small intestine, SI 3
GDS3142_tissue_17_20_mod.txt	GEO	GDS3142	1.61688390246	Mus musculus	Various tissues	tissue	salivary gland	spleen
GDS3142_tissue_11_19_mod.txt	GEO	GDS3142	1.91423448701	Mus musculus	Various tissues	tissue	liver	small intestine
E-MEXP-3111_38_1_3_mod.txt	ArrayExpress	E-MEXP-3111	5.10798301094	Homo sapiens	Interactome of Human Embryo Implantation: Identification of Gene Expression Pathways, Regulation, and Integrated Regulatory Networks.	Factor.Value.Phase.		secretory
E-GEOD-24547_44_2_5_mod.txt	ArrayExpress	E-GEOD-24547	2.55057495452	Homo sapiens	Transcriptional pathway signatures for the Aurora inhibitor Danusertib	FactorValue..CELL.LINE.	COLO205	MDA-MB-468
GDS2819_individual_16_20_mod.txt	GEO	GDS2819	1.87409320858	Homo sapiens	Leukemic white blood cells and various RNA preparation protocols	individual	patient 23	patient 27
GDS3142_tissue_8_22_mod.txt	GEO	GDS3142	-1.71419619547	Mus musculus	Various tissues	tissue	fetus	thymus
E-TABM-1108_31_1_5_mod.txt	ArrayExpress	E-TABM-1108	1.87401575975	Mus musculus	Evaluation of methylmercury on neural development in Embryonic Stem Cell Differentiation Cultures	Factor.Value..TIME.	0	6
E-GEOD-27628_35_1_3_mod.txt	ArrayExpress	E-GEOD-27628	1.36308442758	Mus musculus	Expression data from affected skin from psoriasis mouse models and normal skin from control mice	FactorValue..STRAIN.	C57BL/6	FVB/NCrIBR
GDS2819_individual_19_23_mod.txt	GEO	GDS2819	-2.88038501027	Homo sapiens	Leukemic white blood cells and various RNA preparation protocols	individual	patient 26	patient 5
E-GEOD-21278_33_5_9_mod.txt	ArrayExpress	E-GEOD-21278	-1.20376449409	Mus musculus	A genomic atlas of mouse hypothalamic development	Factor.Value..AGE.	embryonic day 14	embryonic day 18
E-MEXP-928_43_1_2_mod.txt	ArrayExpress	E-MEXP-928	3.01889699384	Mus musculus	Transcription profiling of mouse epidermal cells sorted into three populations based on alpha 6 integrin	Factor.Value..cell.type.	alpha 6 positive	BIB cells
GDS3142_tissue_10_18_mod.txt	GEO	GDS3142	2.18518275808	Mus musculus	Various tissues	tissue	kidney	seminal vesicle
E-GEOD-27316_38_1_2_mod.txt	ArrayExpress	E-GEOD-27316	1.07472459837	Homo sapiens	Effects of long dsRNA expression in HeLa and HEK293 cells	FactorValue..CELL.TYPE.	HEK293 cells	HeLa cells
E-GEOD-24207_47_15_19_mod.txt	ArrayExpress	E-GEOD-24207	3.11793357026	Mus musculus	mRNA analysis in different mouse tissues	FactorValue..TISSUE.	pancreatic islets	seminal vesicle
GDS1054_age_4_5_mod.txt	GEO	GDS1054	2.69339514773	Rattus norvegicus	Iron deficiency effect on duodenum: time course (RAE230A)	age	6 wk	8 d
E-GEOD-20244_37_1_5_mod.txt	ArrayExpress	E-GEOD-20244	-3.05450662269	Mus musculus	A comprehensive methylome map of lineage commitment from hematopoietic progenitors	FactorValue..PROGENITOR.POPULATION.	ALP	DN3
GDS3113_tissue_2_20_mod.txt	GEO	GDS3113	-2.14015992947	Homo sapiens	Various normal tissues	tissue	bone marrow	salivary gland
E-GEOD-19402_34_3_6_mod.txt	ArrayExpress	E-GEOD-19402	1.08704608166	Mus musculus	Gene expression data from hippocampus	FactorValue..TISSUE.TYPE.	Drd2-MSNs	striatum
E-GEOD-9171_27_1_2_mod.txt	ArrayExpress	E-GEOD-9171	1.30750582369	Homo sapiens	Transcription profiling by array of human glioblastoma frozen tumors and cell lines	FactorValue.MATERIAL_TYPE.	cell	organism_part
E-GEOD-14479_30_1_3_mod.txt	ArrayExpress	E-GEOD-14479	1.50462390642	Homo sapiens	Transcription profiling by array of human lymphoblasts from patients with acute myeloid lymphoma or T acute lymphoblastic leukemia, mutant for CEBPA	Factor.Value.genotype.	CEBPA expression silenced	CEBPA wildtype
E-GEOD-18649_35_2_3_mod.txt	ArrayExpress	E-GEOD-18649	-2.73564624186	Mus musculus	Molecular Profiling of the Developing Axial Skeleton: A role for Tgfbr2 in the Development of the Intervertebral Disc.	FactorValue..AGENT.	none	not specified
E-GEOD-11990_35_1_2_mod.txt	ArrayExpress	E-GEOD-11990	1.27505064695	Mus musculus	Gene expression profiling of mouse p53-deficient epidermal carcinoma defines molecular determinants of human cancer malignancy (training dataset)	FactorValue..HISTOLOGICAL.SUBTYPE.	mixed	not specified
E-GEOD-24207_47_9_22_mod.txt	ArrayExpress	E-GEOD-24207	1.48115307265	Mus musculus	mRNA analysis in different mouse tissues	FactorValue..TISSUE.	kidney	testis
E-GEOD-34053_35_1_2_mod.txt	ArrayExpress	E-GEOD-34053	-5.10878775712	Homo sapiens	CD133+ colon cancer cells are more interactive with the tumor microenvironment than CD133- cells	FactorValue..CELL.TYPE.	carcinoma associated fibroblast	CD133- carcinoma cell
GDS1956_disease.state_1_11_mod.txt	GEO	GDS1956	-1.17491307326	Homo sapiens	Various muscle diseases (HG-U133A)	disease.state	acute quadriplegic myopathy	normal
E-GEOD-18483_31_3_6_mod.txt	ArrayExpress	E-GEOD-18483	-1.4478616195	Mus musculus	Leukemias of different origins	FactorValue..CELL.TYPE.	KLS	MEP
E-GEOD-18483_31_4_6_mod.txt	ArrayExpress	E-GEOD-18483	-1.82104014819	Mus musculus	Leukemias of different origins	FactorValue..CELL.TYPE.	leukemia stem cels originated form GMP	MEP
E-GEOD-33426_36_1_2_mod.txt	ArrayExpress	E-GEOD-33426	1.81742195085	Homo sapiens	Three-Dimensional Tumor Profiling Reveals Minimal mRNA Heterogeneity in Esophageal Squamous Cell Carcinoma	FactorValue..TISSUE.	normal fragment	tumor cluster
GDS2666_time_1_8_mod.txt	GEO	GDS2666	-2.75943735405	Mus musculus	Embryonic R1 stem cell differentiation in vitro (MG-430A)	time	0 h	4 d
GDS3142_tissue_2_15_mod.txt	GEO	GDS3142	-1.18270182157	Mus musculus	Various tissues	tissue	adrenal gland	pituitary gland
E-GEOD-18281_36_1_6_mod.txt	ArrayExpress	E-GEOD-18281	3.54421437846	Mus musculus	Spatial mapping of thymic stromal microenvironments reveals unique features influencing T lymphoid differentiation	FactorValue..TISSUE.	Central cortex	Whole medulla
GDS2819_individual_18_19_mod.txt	GEO	GDS2819	2.44791672524	Homo sapiens	Leukemic white blood cells and various RNA preparation protocols	individual	patient 25	patient 26
GDS2666_time_3_8_mod.txt	GEO	GDS2666	-3.15771506957	Mus musculus	Embryonic R1 stem cell differentiation in vitro (MG-430A)	time	14 d	4 d
E-GEOD-19282_42_1_2_mod.txt	ArrayExpress	E-GEOD-19282	-1.48200212732	Mus musculus	The Effects of Globin on Microarray-based Gene Expression Analysis of Mouse Blood	FactorValue..PROTOCOL.	GLOBINclear treated	untreated
E-GEOD-7214_22_1_2_mod.txt	ArrayExpress	E-GEOD-7214	-1.59235956905	Homo sapiens	Comparison of gene expression data between wild-type and DM1-affected cells	Factor.Value..KARYOTYPE.	not specified	X,X
E-GEOD-17184_38_1_4_mod.txt	ArrayExpress	E-GEOD-17184	1.10590324114	Mus musculus	ConA-induced fulminant hepatitis in a mouse model	FactorValue..TIME.POINT.	0 hr	6 hr
GDS2671_time_1_10_mod.txt	GEO	GDS2671	1.97415473817	Mus musculus	Embryonic V6.5 stem cell differentiation in vitro (MG-430A)	time	0 h	7 d
E-GEOD-33134_32_3_4_mod.txt	ArrayExpress	E-GEOD-33134	-1.74464246308	Mus musculus	Protective gene expression changes elicited by an inherited defect in photoreceptor structure.	FactorValue..AGE.	post natal day 6	post natal day 9
GDS3113_tissue_11_30_mod.txt	GEO	GDS3113	2.2209985912	Homo sapiens	Various normal tissues	tissue	liver	trachea
E-GEOD-18281_36_1_4_mod.txt	ArrayExpress	E-GEOD-18281	3.53565941473	Mus musculus	Spatial mapping of thymic stromal microenvironments reveals unique features influencing T lymphoid differentiation	FactorValue..TISSUE.	Central cortex	Sub-capsular cortex
GDS3442_age_1_2_mod.txt	GEO	GDS3442	-1.18968197018	Mus musculus	Embryonic brain development	age	E11.5	E13.5
E-GEOD-22973_39_1_2_mod.txt	ArrayExpress	E-GEOD-22973	-6.76454138083	Homo sapiens	An Invasive Gene Expression Signature in Pancreas Cancer.	FactorValue..CELL.LINE.	AsPC-1	BxPC-3
GDS2687_tissue_1_2_mod.txt	GEO	GDS2687	2.56041641852	Mus musculus	Kruppel-like factor 15 deficient liver and skeletal muscle response to fasting	tissue	liver	skeletal muscle
E-GEOD-24207_47_4_22_mod.txt	ArrayExpress	E-GEOD-24207	1.34797785524	Mus musculus	mRNA analysis in different mouse tissues	FactorValue..TISSUE.	brain	testis
E-GEOD-37566_38_2_4_mod.txt	ArrayExpress	E-GEOD-37566	1.36132625074	Mus musculus	Dendritic cell and monocyte progenitors	FactorValue..PHENOTYPE.	CD19-CD3-NK1.1-B220-CD11c-CD11b-Sca1-CD135+CD115+CD117hi	CD19-CD3-NK1.1-B220-CD11c+MHCII-CD135+Sirpa-
GDS3113_tissue_10_17_mod.txt	GEO	GDS3113	1.7383244507	Homo sapiens	Various normal tissues	tissue	kidney	placenta
GDS3113_tissue_3_31_mod.txt	GEO	GDS3113	1.03766697857	Homo sapiens	Various normal tissues	tissue	brain	Universal Human Reference RNA
E-GEOD-34456_29_2_3_mod.txt	ArrayExpress	E-GEOD-34456	-1.65799058938	Homo sapiens	Expression data from transfection of U87 glioma cells with miR-376a* for 72 hours	FactorValue..TRANSFECTED.	miR-376a*A (72 h)	miR-376a*G (72 h)
GDS1381_disease.state_1_2_mod.txt	GEO	GDS1381	4.93891577649	Homo sapiens	Carboplatin sensitive and resistant ovarian carcinoma	disease.state	carboplatin resistant tumor	carboplatin sensitive tumor
E-GEOD-26408_38_1_3_mod.txt	ArrayExpress	E-GEOD-26408	2.41332513729	Mus musculus	Signatures of murine B-cell development implicate Yy1 as a regulator of the germinal center-specific program	FactorValue..STRAIN.OR.LINE.	129	Bcl6 transgenic (Catoretti et al., Cancer Cell 2005
E-GEOD-24207_47_2_7_mod.txt	ArrayExpress	E-GEOD-24207	1.87907747459	Mus musculus	mRNA analysis in different mouse tissues	FactorValue..TISSUE.	adrenal gland	heart
GDS3113_tissue_1_31_mod.txt	GEO	GDS3113	1.49079445777	Homo sapiens	Various normal tissues	tissue	adrenal gland	Universal Human Reference RNA
GDS2671_time_3_5_mod.txt	GEO	GDS2671	-4.73443533382	Mus musculus	Embryonic V6.5 stem cell differentiation in vitro (MG-430A)	time	14 d	24 h
GDS639_age_2_3_mod.txt	GEO	GDS639	-1.81614576953	Mus musculus	Dystrophin-deficient mdx hindlimb muscle development time course	age	14 day	23 day
GDS1265_development.stage_3_5_mod.txt	GEO	GDS1265	-5.00514470215	Mus musculus	Oocyte development (MOE430A)	development.stage	primordial follicle	small antral follicle
E-GEOD-13093_28_3_5_mod.txt	ArrayExpress	E-GEOD-13093	-2.67899842926	Mus musculus	Feeding schedule and the circadian clock shape rhythms in hepatic gene expression	FactorValue..STRAIN.OR.LINE.	C57/B6, Gender: male, Age: 8-12 weeks, Condition:: Fed	Cry1,Cry2 double KO mice, Gender: male, Age: 8-16 weeks, Condition: ad libitum food availability
E-GEOD-19402_34_2_6_mod.txt	ArrayExpress	E-GEOD-19402	1.2695398874	Mus musculus	Gene expression data from hippocampus	FactorValue..TISSUE.TYPE.	Drd1-MSNs	striatum
E-GEOD-30747_50_1_4_mod.txt	ArrayExpress	E-GEOD-30747	-1.35202166918	Mus musculus	AML mouse models	FactorValue..TRANSGENE.	constitutive MLL-AF9;KrasG12D	not specified
E-TABM-1108_31_3_5_mod.txt	ArrayExpress	E-TABM-1108	1.63367854641	Mus musculus	Evaluation of methylmercury on neural development in Embryonic Stem Cell Differentiation Cultures	Factor.Value..TIME.	4	6
E-GEOD-11199_29_2_3_mod.txt	ArrayExpress	E-GEOD-11199	1.73745657318	Homo sapiens	Transcription profiling by array of human macrophages from tuberculosis patients	Factor.Value.stimulus.	none	tuberculosis extract
E-GEOD-24207_47_4_8_mod.txt	ArrayExpress	E-GEOD-24207	-5.26868098579	Mus musculus	mRNA analysis in different mouse tissues	FactorValue..TISSUE.	brain	insulinoma
E-GEOD-30138_43_2_5_mod.txt	ArrayExpress	E-GEOD-30138	-1.09250928238	Mus musculus	Global Gene Expression Analysis of Murine Limb Development	FactorValue..DEVELOPMENTAL.STAGE.	E11.5	E9.5
GDS181_tissue_26_33_mod.txt	GEO	GDS181	1.80151205811	Homo sapiens	Large-scale analysis of the human transcriptome (HG-U95A)	tissue	prostate cancer	THY+
E-TABM-1091_29_3_6_mod.txt	ArrayExpress	E-TABM-1091	1.2332690988	Homo sapiens	Transcriptiion profiling by array of human ratiometric mixes of high quality RNA from different tissues using different labeling protocols to provide a mechanism for assessing process improvement	Factor.Value..MIX.	Mix1	Universal Human Reference RNA
E-GEOD-26966_28_1_2_mod.txt	ArrayExpress	E-GEOD-26966	-1.47859573912	Homo sapiens	Transcription profiling by array of human gonadotrope and null cell pituitary tumors	FactorValue.disease.state.	normal	pituitary cancer
GDS1629_protocol_3_4_mod.txt	GEO	GDS1629	-2.56497589958	Rattus norvegicus	Immortalized suprachiasmatic nucleus cell line across circadian cycles: time course	protocol	biological replicate 3	technical replicate 1
GDS3142_tissue_16_19_mod.txt	GEO	GDS3142	-1.75219083035	Mus musculus	Various tissues	tissue	placenta	small intestine
GDS2819_individual_14_20_mod.txt	GEO	GDS2819	1.78001137043	Homo sapiens	Leukemic white blood cells and various RNA preparation protocols	individual	patient 21	patient 27
GDS3113_tissue_27_31_mod.txt	GEO	GDS3113	1.0348690542	Homo sapiens	Various normal tissues	tissue	thymus	Universal Human Reference RNA
E-GEOD-27987_35_1_6_mod.txt	ArrayExpress	E-GEOD-27987	2.03010105697	Mus musculus	Differential pre-mRNA processing in Crebbp+/- mice	FactorValue..CELL.TYPE.	Cdkn1a-/- FLHSC	Crebbp+/+ MEF
GDS3142_tissue_1_17_mod.txt	GEO	GDS3142	-3.4903709407	Mus musculus	Various tissues	tissue	adipose tissue	salivary gland
GDS3142_tissue_5_14_mod.txt	GEO	GDS3142	1.95115460228	Mus musculus	Various tissues	tissue	diaphragm	ovary
E-MEXP-3444_36_2_5_mod.txt	ArrayExpress	E-MEXP-3444	-1.92637488244	Mus musculus	Transcriptional profiling by array of mouse cerebellar cortex during postnatal development	Factor.Value.AGE.	3	10
E-GEOD-18680_37_1_3_mod.txt	ArrayExpress	E-GEOD-18680	4.06440926426	Homo sapiens	Gene expression profile of human ovarian cancer cell lines in vitro	FactorValue..CELL.LINE.	parental IGROV	parental T112D
E-GEOD-23584_42_2_6_mod.txt	ArrayExpress	E-GEOD-23584	-1.6203300174	Mus musculus	The Identification of Genetic Factors Influencing Susceptibility to Staphylococcus aureus Infection in mice susceptible and resistant to S. aureus infection	FactorValue..STRAIN.	AKR/J	NOD/ShiLtJ
E-GEOD-24207_47_5_14_mod.txt	ArrayExpress	E-GEOD-24207	-4.74217689157	Mus musculus	mRNA analysis in different mouse tissues	FactorValue..TISSUE.	diaphragm	pancreatic acini
E-GEOD-21224_25_3_4_mod.txt	ArrayExpress	E-GEOD-21224	2.23913501098	Mus musculus	Transcriptional ontogeny of the developing liver	Factor.Value..DEVELOPMENTAL.STAGE.	PND67 mouse	PND7 mouse
E-GEOD-22334_37_1_2_mod.txt	ArrayExpress	E-GEOD-22334	-4.2820645026	Homo sapiens	Induction of apoptotic processes in Capan-1 pancreatic carcinoma cells by restoration of p16INK4a expression	FactorValue..P16.RESTORATION.	no	yes
E-TABM-1091_29_2_4_mod.txt	ArrayExpress	E-TABM-1091	1.42753398957	Homo sapiens	Transcriptiion profiling by array of human ratiometric mixes of high quality RNA from different tissues using different labeling protocols to provide a mechanism for assessing process improvement	Factor.Value..MIX.	liver only	Mix2
GDS3113_tissue_20_27_mod.txt	GEO	GDS3113	1.2574662661	Homo sapiens	Various normal tissues	tissue	salivary gland	thymus
GDS2671_time_2_3_mod.txt	GEO	GDS2671	3.66599538436	Mus musculus	Embryonic V6.5 stem cell differentiation in vitro (MG-430A)	time	12 h	14 d
E-GEOD-15840_27_1_2_mod.txt	ArrayExpress	E-GEOD-15840	-1.09245385557	Mus musculus	Transcription profiling by array of Mus musculus hematopoetic stem cells and progenitor cells mutant for Dnmt1	Factor.Value..CELL.SURFACE.ANTIGENS.	Lineage-c-Kit+Sca-1-	Lineage-c-Kit+Sca-1+CD34-
E-GEOD-15543_32_1_3_mod.txt	ArrayExpress	E-GEOD-15543	1.77462673917	Homo sapiens	Transcription profiling by array of human pancreatic islet cells after in vitro expansion	Factor.Value.protocol.		expansion protocol: PPRF
E-GEOD-24207_47_4_19_mod.txt	ArrayExpress	E-GEOD-24207	1.94217679	Mus musculus	mRNA analysis in different mouse tissues	FactorValue..TISSUE.	brain	seminal vesicle
GDS2819_individual_19_21_mod.txt	GEO	GDS2819	-2.33037695383	Homo sapiens	Leukemic white blood cells and various RNA preparation protocols	individual	patient 26	patient 3
GDS3113_tissue_1_19_mod.txt	GEO	GDS3113	2.46108531581	Homo sapiens	Various normal tissues	tissue	adrenal gland	retina
GDS3113_tissue_12_30_mod.txt	GEO	GDS3113	-1.25984156328	Homo sapiens	Various normal tissues	tissue	lung	trachea
GDS2819_individual_1_18_mod.txt	GEO	GDS2819	-2.03381851073	Homo sapiens	Leukemic white blood cells and various RNA preparation protocols	individual	patient 1	patient 25
E-GEOD-21063_41_1_4_mod.txt	ArrayExpress	E-GEOD-21063	2.75008663629	Mus musculus	NFATc1 controls the survival	FactorValue..TIME.STIMULATED.WITH.ANTI.IGM.	16h	unstimulated
GDS2819_individual_3_26_mod.txt	GEO	GDS2819	4.65129789302	Homo sapiens	Leukemic white blood cells and various RNA preparation protocols	individual	patient 11	patient 8
E-GEOD-23584_42_1_6_mod.txt	ArrayExpress	E-GEOD-23584	-1.73340864473	Mus musculus	The Identification of Genetic Factors Influencing Susceptibility to Staphylococcus aureus Infection in mice susceptible and resistant to S. aureus infection	FactorValue..STRAIN.	A/J	NOD/ShiLtJ
GDS181_tissue_13_26_mod.txt	GEO	GDS181	2.91657302764	Homo sapiens	Large-scale analysis of the human transcriptome (HG-U95A)	tissue	HL60	prostate cancer
E-GEOD-19639_26_2_4_mod.txt	ArrayExpress	E-GEOD-19639	-1.29632956671	Homo sapiens	Transcription profiling by array of human estrogen receptor positive breast cancer cell lines after long-term estrogen deprivation	Factor.Value..cell.line.	MCF-7	ZR75-1
GDS2819_individual_7_20_mod.txt	GEO	GDS2819	1.50596798622	Homo sapiens	Leukemic white blood cells and various RNA preparation protocols	individual	patient 15	patient 27
E-GEOD-26408_33_1_9_mod.txt	ArrayExpress	E-GEOD-26408	-1.77547617801	Mus musculus	Signatures of murine B-cell development implicate Yy1 as a regulator of the germinal center-specific program	FactorValue..CELL.TYPE.	Lymphoid tumor	Purified Transitional (B220-positive/Cd93-positive) B-cells
GDS3113_tissue_5_22_mod.txt	GEO	GDS3113	2.03904943689	Homo sapiens	Various normal tissues	tissue	fetal brain	skin
E-GEOD-19616_36_3_4_mod.txt	ArrayExpress	E-GEOD-19616	1.96803137582	Mus musculus	Gene expression profiling of mouse p53-deficient epidermal carcinoma defines molecular determinants of human cancer malignancy (testing dataset)	FactorValue..HISTOLOGICAL.SUBTYPE.	poorly differentiated	spindle cell carcinoma
E-GEOD-24489_47_1_2_mod.txt	ArrayExpress	E-GEOD-24489	1.5257766914	Mus musculus	Effect of H11 Kinase/Hsp22 deletion in response to cardiac stress	FactorValue..STRESS.	control	pressure overload
E-GEOD-24207_47_11_19_mod.txt	ArrayExpress	E-GEOD-24207	-2.82510421298	Mus musculus	mRNA analysis in different mouse tissues	FactorValue..TISSUE.	lung	seminal vesicle
E-GEOD-16615_46_2_5_mod.txt	ArrayExpress	E-GEOD-16615	1.31774445663	Homo sapiens	gene expression in human subcutaneous adipose tissue after CLA intervention	FactorValue..SUBJECT.	2	5
GDS756_disease.state_1_2_mod.txt	GEO	GDS756	-2.64087784944	Homo sapiens	Colon cancer progression	disease.state	metastasic tumor	primary tumor
GDS3142_tissue_11_20_mod.txt	GEO	GDS3142	3.36910709514	Mus musculus	Various tissues	tissue	liver	spleen
E-TABM-669_25_4_6_mod.txt	ArrayExpress	E-TABM-669	2.05521493548	Mus musculus	Transcription profiling of mouse embryonic stem cell line Sox1Tv2 during neuronal differentiation	Factor.Value..Age.d..	E14+3 days	E14+6 days
E-GEOD-18567_24_1_2_mod.txt	ArrayExpress	E-GEOD-18567	1.14930282101	Mus musculus	Temporal profiling of gene expression in cochleae of wild type and alpha9 null mice	Factor.Value..AGE.	P13	P3
E-GEOD-23182_46_1_2_mod.txt	ArrayExpress	E-GEOD-23182	-2.26721101548	Mus musculus	Systemic inflammation modulates Fc receptor expression on microglia in chronic neurodegeneration	FactorValue..INNOCULATION.	ME7 prion disease	Normal Brain Homogenate (NBH)
GDS1490_tissue_8_26_mod.txt	GEO	GDS1490	1.23504400433	Mus musculus	Neural tissue profiling	tissue	dentate gyrus	retina
GDS1695_cell.type_2_4_mod.txt	GEO	GDS1695	-1.34723103639	Mus musculus	Self-renewing memory B cell	cell.type	memory B cells	plasma B cells
GDS2819_individual_20_23_mod.txt	GEO	GDS2819	-1.97824209944	Homo sapiens	Leukemic white blood cells and various RNA preparation protocols	individual	patient 27	patient 5
E-GEOD-26408_38_3_4_mod.txt	ArrayExpress	E-GEOD-26408	-1.50541796731	Mus musculus	Signatures of murine B-cell development implicate Yy1 as a regulator of the germinal center-specific program	FactorValue..STRAIN.OR.LINE.	Bcl6 transgenic (Catoretti et al., Cancer Cell 2005	Lig4/P53 KO (Frank et al., Mol. Cell 2000;5:993-1002)
E-GEOD-23782_42_2_3_mod.txt	ArrayExpress	E-GEOD-23782	1.53279195871	Mus musculus	Adult epidermal Notch activity induces dermal accumulation of stromal cells	FactorValue..TISSUE.	epidermis	Whole Skin
GDS1695_cell.type_1_2_mod.txt	GEO	GDS1695	2.98132001907	Mus musculus	Self-renewing memory B cell	cell.type	germinal center B cells	memory B cells
E-GEOD-26104_40_2_6_mod.txt	ArrayExpress	E-GEOD-26104	-2.41831082405	Homo sapiens	Search for specific biomarkers of IFN-beta bioactivity in patients with MS	FactorValue..INDIVIDUAL.	Patient 112	Patient 4
E-GEOD-32334_30_1_2_mod.txt	ArrayExpress	E-GEOD-32334	-2.38366312034	Mus musculus	Developmental timecourse of mouse ocular lens and whole embryo control	FactorValue..ORGANISM.PART.	Lens	Tooth germ
GDS2819_individual_12_19_mod.txt	GEO	GDS2819	1.55013697126	Homo sapiens	Leukemic white blood cells and various RNA preparation protocols	individual	patient 2	patient 26
E-GEOD-26104_40_2_4_mod.txt	ArrayExpress	E-GEOD-26104	-2.22189916795	Homo sapiens	Search for specific biomarkers of IFN-beta bioactivity in patients with MS	FactorValue..INDIVIDUAL.	Patient 112	Patient 116
E-GEOD-19402_34_2_5_mod.txt	ArrayExpress	E-GEOD-19402	1.30089101237	Mus musculus	Gene expression data from hippocampus	FactorValue..TISSUE.TYPE.	Drd1-MSNs	hypothalamus
E-GEOD-24207_47_12_14_mod.txt	ArrayExpress	E-GEOD-24207	-4.76711899041	Mus musculus	mRNA analysis in different mouse tissues	FactorValue..TISSUE.	muscle	pancreatic acini
GDS3113_tissue_13_20_mod.txt	GEO	GDS3113	-1.97093116972	Homo sapiens	Various normal tissues	tissue	mammary gland	salivary gland
E-GEOD-18534_32_1_3_mod.txt	ArrayExpress	E-GEOD-18534	1.80133758867	Mus musculus	Transcription profiling by array of a mouse small cell lung cancer model	Factor.Value..GENOTYPE.	Rb -/-; p53 -/-	wild type
E-GEOD-15543_32_1_4_mod.txt	ArrayExpress	E-GEOD-15543	1.52579246751	Homo sapiens	Transcription profiling by array of human pancreatic islet cells after in vitro expansion	Factor.Value.protocol.		expansion protocol: Whittier
E-GEOD-34456_29_1_3_mod.txt	ArrayExpress	E-GEOD-34456	-1.50102542694	Homo sapiens	Expression data from transfection of U87 glioma cells with miR-376a* for 72 hours	FactorValue..TRANSFECTED.	control miRNA (72 h)	miR-376a*G (72 h)
GDS589_tissue_4_30_mod.txt	GEO	GDS589	-2.34727279155	Rattus norvegicus	Multiple normal tissue gene expression across strains	tissue	cerebellum	ventral tegmental area
E-GEOD-21483_38_1_2_mod.txt	ArrayExpress	E-GEOD-21483	-3.03083275373	Homo sapiens	Regulation of HB-EGF by miR-212 and acquired cetuximab-resistance in head and neck cancer	FactorValue..CELL.LINE.	1Cc8	SCC1
E-GEOD-24207_47_10_19_mod.txt	ArrayExpress	E-GEOD-24207	3.29991652909	Mus musculus	mRNA analysis in different mouse tissues	FactorValue..TISSUE.	liver	seminal vesicle
GDS3068_dose_1_2_mod.txt	GEO	GDS3068	5.32685792801	Homo sapiens	Primary hepatocytes and HepG2 liver cells response to various fluoroquinolones	dose	100 uM	400 uM
GDS3113_tissue_22_27_mod.txt	GEO	GDS3113	-1.41461992144	Homo sapiens	Various normal tissues	tissue	skin	thymus
E-GEOD-33145_31_2_3_mod.txt	ArrayExpress	E-GEOD-33145	1.07562591722	Homo sapiens	Expression data from DKAT and other breast cancer cell lines under baseline growth conditions	FactorValue..CELL.LINE.	Human breast cancer-derived cell line HMEC	Human breast cancer-derived cell line MDA-MB-231
E-GEOD-26176_38_1_2_mod.txt	ArrayExpress	E-GEOD-26176	1.24500105156	Homo sapiens	Functional evidence that Drosha over-expression in cervical squamous cell carcinoma affects cell phenotype and microRNA profiles [mRNA]	FactorValue..PASSAGE.	19 (p19)	22 (p22)
E-GEOD-30747_49_2_3_mod.txt	ArrayExpress	E-GEOD-30747	1.97825480489	Mus musculus	AML mouse models	FactorValue..KNOCKDOWN.	luciferase	not specified
GDS589_tissue_4_29_mod.txt	GEO	GDS589	-1.47546654801	Rattus norvegicus	Multiple normal tissue gene expression across strains	tissue	cerebellum	ventral striatum
E-GEOD-26862_34_2_3_mod.txt	ArrayExpress	E-GEOD-26862	-2.12977727286	Homo sapiens	Expression data of human eGFP-SOX17+ endoderm cells	FactorValue..CELL.TYPE.	hSOX17-2 derived stage 1 endoderm	hSOX17-2 derived stage 2 endoderm
E-TABM-669_25_1_7_mod.txt	ArrayExpress	E-TABM-669	3.48593823115	Mus musculus	Transcription profiling of mouse embryonic stem cell line Sox1Tv2 during neuronal differentiation	Factor.Value..Age.d..	E14+0 days	E14+8 days
GDS1629_protocol_1_4_mod.txt	GEO	GDS1629	-2.55676046545	Rattus norvegicus	Immortalized suprachiasmatic nucleus cell line across circadian cycles: time course	protocol	biological replicate 1	technical replicate 1
E-GEOD-35758_31_1_2_mod.txt	ArrayExpress	E-GEOD-35758	2.72056102247	Mus musculus	Comparative analysis of S100a10 and Glt25d2 cortical pyramidal cells	FactorValue..LINE.	DU9	ES691
E-GEOD-23583_50_1_5_mod.txt	ArrayExpress	E-GEOD-23583	-1.80975141789	Homo sapiens	Highly efficient reprogramming to pluripotency and directed differentiation using synthetic mRNA	FactorValue..CELL.TYPE.	BJ fibroblast	iPS cells derived from dH1CF fibroblast
E-GEOD-27515_38_1_3_mod.txt	ArrayExpress	E-GEOD-27515	-7.60337750156	Homo sapiens	Isolation and characterization of a metastatic hybrid cell line generated by ER negative and ER positive breast cancer cells in mouse bone marrow	FactorValue..CELL.LINE.	B6TC	ZR75
GDS181_tissue_13_33_mod.txt	GEO	GDS181	4.71808508574	Homo sapiens	Large-scale analysis of the human transcriptome (HG-U95A)	tissue	HL60	THY+
GDS3113_tissue_13_21_mod.txt	GEO	GDS3113	-2.08888106564	Homo sapiens	Various normal tissues	tissue	mammary gland	skeletal muscle
E-GEOD-14519_33_1_2_mod.txt	ArrayExpress	E-GEOD-14519	1.79653232431	Homo sapiens	Transcription profiling by array of human multiple myeloma cell lines after treatment with arsenic	Factor.Value.cell.line.	8226/S	KMS11
E-GEOD-21278_33_2_6_mod.txt	ArrayExpress	E-GEOD-21278	-1.03581339507	Mus musculus	A genomic atlas of mouse hypothalamic development	Factor.Value..AGE.	embryonic day 11	embryonic day 15
E-GEOD-27932_35_1_3_mod.txt	ArrayExpress	E-GEOD-27932	-2.60349108739	Mus musculus	FoxOs are lineage-restricted redundant tumor suppressors and regulate endothelial cell homeostasis.	FactorValue..CELL.TYPE.	Liver Sinusoidal Endothelial Cells	not specified
E-GEOD-24207_47_4_13_mod.txt	ArrayExpress	E-GEOD-24207	3.83958146343	Mus musculus	mRNA analysis in different mouse tissues	FactorValue..TISSUE.	brain	ovary
E-GEOD-21278_33_8_11_mod.txt	ArrayExpress	E-GEOD-21278	-2.1522886048	Mus musculus	A genomic atlas of mouse hypothalamic development	Factor.Value..AGE.	embryonic day 17	postnatal day 21
GDS2577_specimen_1_2_mod.txt	GEO	GDS2577	-3.80721692698	Mus musculus	Regenerating liver and developing embryonic liver comparison	specimen	developing liver	regenerating liver
GDS3142_tissue_3_11_mod.txt	GEO	GDS3142	-3.6856325994	Mus musculus	Various tissues	tissue	bone marrow	liver
GDS3142_tissue_5_11_mod.txt	GEO	GDS3142	-2.67492044465	Mus musculus	Various tissues	tissue	diaphragm	liver
E-GEOD-30499_44_1_3_mod.txt	ArrayExpress	E-GEOD-30499	-2.19173869755	Homo sapiens	Inhibition of nonsense-mediated RNA decay by the tumor microenvironment promotes tumorigenesis	FactorValue..SAMPLING.TIME.POINT.	0 hr	3 hrs
E-MEXP-962_32_3_5_mod.txt	ArrayExpress	E-MEXP-962	1.14362695686	Mus musculus	Transcription profiling of hippocampi from wild type and alpha-CaMKII+/- mice	Factor.Value..age.	27	40
E-GEOD-16238_34_1_2_mod.txt	ArrayExpress	E-GEOD-16238	-1.52698491338	Homo sapiens	Genome-wide identification of binding sites of Evi1 in human myeloid cell lines	Factor.Value..CELL.LINE.	HTB-58	TF-1
GDS565_tissue_3_4_mod.txt	GEO	GDS565	2.14512733204	Mus musculus	Sex specific transcription in somatic and reproductive tissues	tissue	liver	ovary
E-GEOD-22381_39_2_3_mod.txt	ArrayExpress	E-GEOD-22381	-3.59603217537	Mus musculus	Identification of downstream transcriptional targets of Dlx5 during early mouse inner ear (otocyst/otic vesicle) development	FactorValue..GENOTYPE.VARIATION.	N/A	Wild-type
GDS3113_tissue_19_27_mod.txt	GEO	GDS3113	-2.00515991223	Homo sapiens	Various normal tissues	tissue	retina	thymus
E-GEOD-27987_35_2_6_mod.txt	ArrayExpress	E-GEOD-27987	2.01157347741	Mus musculus	Differential pre-mRNA processing in Crebbp+/- mice	FactorValue..CELL.TYPE.	Cdkn1a+/+ FLHSC	Crebbp+/+ MEF
GDS1490_tissue_27_29_mod.txt	GEO	GDS1490	-1.49108075481	Mus musculus	Neural tissue profiling	tissue	skeletal muscle	spleen
GDS2214_individual_2_5_mod.txt	GEO	GDS2214	-1.12868215356	Homo sapiens	Septic neutrophil response to lipopolysaccharide and high mobility group box 1 protein	individual	patient 15	patient 6
GDS2958_cell.line_2_3_mod.txt	GEO	GDS2958	-6.03663007832	Homo sapiens	Tumor suppressor PTEN depletion effect on various cell lines	cell.line	HCC827	SKBR-3
GDS2819_disease.state_5_9_mod.txt	GEO	GDS2819	-1.72296473721	Homo sapiens	Leukemic white blood cells and various RNA preparation protocols	disease.state	AML with t 11q23, MLL	T-ALL
E-GEOD-25140_35_2_4_mod.txt	ArrayExpress	E-GEOD-25140	-1.62991090193	Mus musculus	Prostate specific Pten deletion	FactorValue..GENOTYPE.	Prostate-specific Pten and Smad4 deletion	wild-type
GDS3113_tissue_7_27_mod.txt	GEO	GDS3113	1.48144922148	Homo sapiens	Various normal tissues	tissue	fetal liver	thymus
E-GEOD-16070_32_1_2_mod.txt	ArrayExpress	E-GEOD-16070	-1.68118925458	Homo sapiens	Networking of differentially expressed genes in human MCF7 breast cancer cells resistant to methotrexate	FactorValue..METHOTREXATE.SENSITIVITY.	resistant	sensitive
GDS183_disease.state_1_2_mod.txt	GEO	GDS183	1.7582430437	Homo sapiens	Bladder tumor stage classification	disease.state	tumor stage T1	tumor stage T2+
E-GEOD-21278_33_1_11_mod.txt	ArrayExpress	E-GEOD-21278	-3.14728268144	Mus musculus	A genomic atlas of mouse hypothalamic development	Factor.Value..AGE.	embryonic day 10	postnatal day 21
E-GEOD-34126_42_1_2_mod.txt	ArrayExpress	E-GEOD-34126	-1.96035576151	Mus musculus	An Animal Model of Myc-driven medulloblastoma	FactorValue..CELL.TYPE.	FACS-sorted Prominin1+, Lineage-negative (Lin) cells	Myc/DNp53-infected Prom1+ cells
E-GEOD-24207_47_1_7_mod.txt	ArrayExpress	E-GEOD-24207	-2.11258125265	Mus musculus	mRNA analysis in different mouse tissues	FactorValue..TISSUE.	adipose tissue	heart
GDS2158_agent_1_2_mod.txt	GEO	GDS2158	-1.25389792824	Mus musculus	Emery-Dreifuss muscular dystrophy model: regenerating skeletal muscle	agent	cardiotoxin	untreated
GDS3113_tissue_10_25_mod.txt	GEO	GDS3113	1.13137113273	Homo sapiens	Various normal tissues	tissue	kidney	spleen
GDS181_tissue_25_34_mod.txt	GEO	GDS181	1.47078324557	Homo sapiens	Large-scale analysis of the human transcriptome (HG-U95A)	tissue	prostate	THY+
E-GEOD-34126_41_2_4_mod.txt	ArrayExpress	E-GEOD-34126	-2.10990589081	Mus musculus	An Animal Model of Myc-driven medulloblastoma	FactorValue..CELL.SOURCE.	patched tumors	stem cell-derived tumors
GDS2671_time_3_8_mod.txt	GEO	GDS2671	-2.97360157371	Mus musculus	Embryonic V6.5 stem cell differentiation in vitro (MG-430A)	time	14 d	4 d
GDS1499_genotype_variation_2_3_mod.txt	GEO	GDS1499	-1.04094788038	Homo sapiens	Hepatocyte nuclear factor 1beta mutant overexpression effect on embryonic kidney cells	genotype_variation	wild type HNF1alpha	wild type HNF1beta
GDS3113_tissue_15_17_mod.txt	GEO	GDS3113	2.96268602793	Homo sapiens	Various normal tissues	tissue	pancreas	placenta
E-GEOD-24207_47_10_20_mod.txt	ArrayExpress	E-GEOD-24207	1.99021250825	Mus musculus	mRNA analysis in different mouse tissues	FactorValue..TISSUE.	liver	small intestine
GDS589_tissue_5_25_mod.txt	GEO	GDS589	1.44942187012	Rattus norvegicus	Multiple normal tissue gene expression across strains	tissue	cerebral cortex	skeletal muscle
E-GEOD-24207_47_18_21_mod.txt	ArrayExpress	E-GEOD-24207	2.16941080176	Mus musculus	mRNA analysis in different mouse tissues	FactorValue..TISSUE.	salivary gland	spleen
GDS3142_tissue_3_19_mod.txt	GEO	GDS3142	-2.07228994276	Mus musculus	Various tissues	tissue	bone marrow	small intestine
GDS3113_tissue_14_27_mod.txt	GEO	GDS3113	-1.78843617102	Homo sapiens	Various normal tissues	tissue	ovary	thymus
GDS3142_tissue_3_14_mod.txt	GEO	GDS3142	1.37712780034	Mus musculus	Various tissues	tissue	bone marrow	ovary
E-GEOD-21278_33_4_11_mod.txt	ArrayExpress	E-GEOD-21278	-3.46230848189	Mus musculus	A genomic atlas of mouse hypothalamic development	Factor.Value..AGE.	embryonic day 13	postnatal day 21
GDS3142_tissue_1_2_mod.txt	GEO	GDS3142	-3.83832916685	Mus musculus	Various tissues	tissue	adipose tissue	adrenal gland
GDS1673_other_1_2_mod.txt	GEO	GDS1673	-1.08729387889	Homo sapiens	Non-diseased lung tissue	other	African American	Caucasian
GDS3113_tissue_4_31_mod.txt	GEO	GDS3113	1.60762819786	Homo sapiens	Various normal tissues	tissue	colon	Universal Human Reference RNA
E-GEOD-21224_25_1_2_mod.txt	ArrayExpress	E-GEOD-21224	-2.40564550495	Mus musculus	Transcriptional ontogeny of the developing liver	Factor.Value..DEVELOPMENTAL.STAGE.	GD19 mouse	PND32 mouse
E-GEOD-24207_47_17_20_mod.txt	ArrayExpress	E-GEOD-24207	-1.79599368602	Mus musculus	mRNA analysis in different mouse tissues	FactorValue..TISSUE.	placenta	small intestine
GDS1490_tissue_9_29_mod.txt	GEO	GDS1490	-1.42359596406	Mus musculus	Neural tissue profiling	tissue	entorhinal cortex	spleen
E-GEOD-23009_38_1_3_mod.txt	ArrayExpress	E-GEOD-23009	2.4360465824	Mus musculus	Effect of intra-cytoplasmic sperm injection (ICSI) on gene expression and development of mouse preimplantation embryos	FactorValue..GROUP.	Embryos produced in vivo	ICSI embryos cultured in WM
E-GEOD-21063_41_2_3_mod.txt	ArrayExpress	E-GEOD-21063	-2.52076031818	Mus musculus	NFATc1 controls the survival	FactorValue..TIME.STIMULATED.WITH.ANTI.IGM.	3h	8h
E-GEOD-14680_30_1_3_mod.txt	ArrayExpress	E-GEOD-14680	-6.36667197619	Homo sapiens	Transcription profiling of human multiple myeloma cells to compare the effect of CS1 expression levels.	Factor.Value.transfection.	control vector	CS1 shRNA
E-GEOD-13873_35_1_2_mod.txt	ArrayExpress	E-GEOD-13873	1.8290935439	Mus musculus	Expression data from murine gastric epithelium	FactorValue..PATHOLOGY.	gastritis	hyperplasia
GDS1490_tissue_26_33_mod.txt	GEO	GDS1490	-1.16175142423	Mus musculus	Neural tissue profiling	tissue	retina	thymus
E-GEOD-20505_23_1_3_mod.txt	ArrayExpress	E-GEOD-20505	-3.67819175958	Homo sapiens	Transcription profilin by array of human CD34+ hematopoietic progenitor cells grown under different conditions	Factor.Value..TREATMENT.TIME.	0	72
E-GEOD-23938_38_1_4_mod.txt	ArrayExpress	E-GEOD-23938	-3.18966448521	Mus musculus	Comprehensive genomic profiling identified miRNA signatures associated with mammary tumor differentiation and development	FactorValue..GENETICALLY.ENGINEERED.MOUSE.MODEL.	Brca1-/-p53+/-	MMTV-H2N
GDS3142_tissue_1_9_mod.txt	GEO	GDS3142	-1.82036876	Mus musculus	Various tissues	tissue	adipose tissue	heart
E-GEOD-19402_34_2_4_mod.txt	ArrayExpress	E-GEOD-19402	1.54163029578	Mus musculus	Gene expression data from hippocampus	FactorValue..TISSUE.TYPE.	Drd1-MSNs	hippocampus
GDS3142_tissue_9_21_mod.txt	GEO	GDS3142	-1.3721129138	Mus musculus	Various tissues	tissue	heart	testis
E-GEOD-22381_39_1_2_mod.txt	ArrayExpress	E-GEOD-22381	3.80797148761	Mus musculus	Identification of downstream transcriptional targets of Dlx5 during early mouse inner ear (otocyst/otic vesicle) development	FactorValue..GENOTYPE.VARIATION.	Dlx5-null	N/A
E-GEOD-18552_59_1_2_mod.txt	ArrayExpress	E-GEOD-18552	6.99955303776	Homo sapiens	CDK inhibitors and flavopiridol profiling on A2780 and MCF7 cells	FactorValue..CELL.TYPE.	adenocarcinoma mammary cells	adenocarcinoma ovary
GDS3113_tissue_4_28_mod.txt	GEO	GDS3113	1.77202453215	Homo sapiens	Various normal tissues	tissue	colon	thyroid
GDS3113_tissue_7_24_mod.txt	GEO	GDS3113	2.48079318064	Homo sapiens	Various normal tissues	tissue	fetal liver	spinal cord
E-GEOD-17906_35_2_3_mod.txt	ArrayExpress	E-GEOD-17906	-2.58693798791	Homo sapiens	Transcription profiling by array of human CD90 positive prostate stromal fibromuscular tumor cells	Factor.Value.cell.type.	CD13 positive	CD26 positive
E-GEOD-26621_29_1_2_mod.txt	ArrayExpress	E-GEOD-26621	1.11381079227	Mus musculus	Metastasis and Survival of Breast Cancer Stem Cells Mediated by Cytoskeleton Remodeling and PI3K/mTOR Signaling transcription factors	FactorValue..CELL.SUBPOPULATION.	CD24-CD29-	CD24+CD29+
E-GEOD-29848_38_2_6_mod.txt	ArrayExpress	E-GEOD-29848	1.13045139119	Mus musculus	Microarray data of differentiating embryonic stem cells overexpressing the transcription factor Msgn1	FactorValue..TREATMENT.	Day2 EBs cultured for another 24h	Day2 EBs induced with doxycycline and cultured for another 48h
GDS1642_agent_1_2_mod.txt	GEO	GDS1642	1.04531692138	Rattus norvegicus	Kainate-induced status epilepticus effect on immature hippocampus: time course	agent	control	kainate
GDS3142_tissue_1_4_mod.txt	GEO	GDS3142	-4.39917951893	Mus musculus	Various tissues	tissue	adipose tissue	brain
E-GEOD-24207_47_7_14_mod.txt	ArrayExpress	E-GEOD-24207	-4.66559433687	Mus musculus	mRNA analysis in different mouse tissues	FactorValue..TISSUE.	heart	pancreatic acini
E-GEOD-17404_42_2_3_mod.txt	ArrayExpress	E-GEOD-17404	1.01682086095	Mus musculus	Activated AMPK and prostaglandins are involved in the response to conjugated linoleic acid and are sufficient to cause lipid reductions in adipocytes	FactorValue..TREATMENT.	linoleic acids	phenformin
GDS2671_time_3_11_mod.txt	GEO	GDS2671	-4.06138358797	Mus musculus	Embryonic V6.5 stem cell differentiation in vitro (MG-430A)	time	14 d	9 d
GDS1973_cell.type_1_4_mod.txt	GEO	GDS1973	1.53349638629	Homo sapiens	Various prostate cell types	cell.type	basal	stromal fibromuscular
GDS3113_tissue_5_28_mod.txt	GEO	GDS3113	1.82369490394	Homo sapiens	Various normal tissues	tissue	fetal brain	thyroid
E-GEOD-24207_47_6_8_mod.txt	ArrayExpress	E-GEOD-24207	-8.48401432709	Mus musculus	mRNA analysis in different mouse tissues	FactorValue..TISSUE.	eye	insulinoma
GDS3113_tissue_8_17_mod.txt	GEO	GDS3113	1.56915449895	Homo sapiens	Various normal tissues	tissue	fetal thymus	placenta
E-GEOD-24207_47_1_15_mod.txt	ArrayExpress	E-GEOD-24207	-5.55031671759	Mus musculus	mRNA analysis in different mouse tissues	FactorValue..TISSUE.	adipose tissue	pancreatic islets
GDS2819_individual_16_26_mod.txt	GEO	GDS2819	3.69223922081	Homo sapiens	Leukemic white blood cells and various RNA preparation protocols	individual	patient 23	patient 8
GDS3113_tissue_9_12_mod.txt	GEO	GDS3113	1.32444037749	Homo sapiens	Various normal tissues	tissue	heart	lung
E-GEOD-28417_36_2_3_mod.txt	ArrayExpress	E-GEOD-28417	5.11826526701	Mus musculus	Expression data from mouse tissues	FactorValue..ORGANISM.PART.	liver	lung
GDS639_age_3_5_mod.txt	GEO	GDS639	1.59430732396	Mus musculus	Dystrophin-deficient mdx hindlimb muscle development time course	age	23 day	56 day
E-GEOD-27291_40_2_3_mod.txt	ArrayExpress	E-GEOD-27291	1.25098325753	Homo sapiens	Expression data from human TCRVg9-positive gamma delta T lymphocytes	FactorValue..TIME.	6 h	7 d
E-GEOD-24207_47_4_17_mod.txt	ArrayExpress	E-GEOD-24207	2.63566377313	Mus musculus	mRNA analysis in different mouse tissues	FactorValue..TISSUE.	brain	placenta
E-GEOD-35766_31_1_2_mod.txt	ArrayExpress	E-GEOD-35766	2.53243438521	Mus musculus	Identification of the cortical neurons that mediate antidepressant responses	FactorValue..DRIVER.	Glt25d2	S100a10
E-GEOD-18486_38_2_3_mod.txt	ArrayExpress	E-GEOD-18486	1.28001130098	Homo sapiens	CDK inhibitors PHA-848125 and PHA-690509 profiling on A2780	FactorValue..TREATMENT.	CDk-509	Untreated
E-GEOD-21447_43_7_8_mod.txt	ArrayExpress	E-GEOD-21447	2.54013911465	Mus musculus	A global expression switch marks pachytene initiation during mouse male meiosis	FactorValue..MEIOTIC.FRACTION.	round spermatids	spermatogonia
GDS3142_tissue_2_9_mod.txt	GEO	GDS3142	2.01796040685	Mus musculus	Various tissues	tissue	adrenal gland	heart
E-GEOD-24207_47_14_23_mod.txt	ArrayExpress	E-GEOD-24207	4.43816833952	Mus musculus	mRNA analysis in different mouse tissues	FactorValue..TISSUE.	pancreatic acini	thymus
GDS3113_tissue_13_19_mod.txt	GEO	GDS3113	1.29169500862	Homo sapiens	Various normal tissues	tissue	mammary gland	retina
E-GEOD-24207_47_16_20_mod.txt	ArrayExpress	E-GEOD-24207	1.49480897512	Mus musculus	mRNA analysis in different mouse tissues	FactorValue..TISSUE.	pituitary gland	small intestine
GDS3113_tissue_8_22_mod.txt	GEO	GDS3113	1.76515323604	Homo sapiens	Various normal tissues	tissue	fetal thymus	skin
E-GEOD-19402_34_1_3_mod.txt	ArrayExpress	E-GEOD-19402	-1.38689576329	Mus musculus	Gene expression data from hippocampus	FactorValue..TISSUE.TYPE.	cortex	Drd2-MSNs
GDS3113_tissue_3_32_mod.txt	GEO	GDS3113	1.31964598923	Homo sapiens	Various normal tissues	tissue	brain	uterus
GDS3113_tissue_8_24_mod.txt	GEO	GDS3113	1.34987727376	Homo sapiens	Various normal tissues	tissue	fetal thymus	spinal cord
GDS3142_tissue_2_14_mod.txt	GEO	GDS3142	3.21864785977	Mus musculus	Various tissues	tissue	adrenal gland	ovary
GDS3113_tissue_4_13_mod.txt	GEO	GDS3113	1.28622404728	Homo sapiens	Various normal tissues	tissue	colon	mammary gland
E-GEOD-20505_26_1_2_mod.txt	ArrayExpress	E-GEOD-20505	-3.77797642543	Homo sapiens	Transcription profilin by array of human CD34+ hematopoietic progenitor cells grown under different conditions	Factor.Value..CULTURE.CONDITIONS.	none	S1 stimulation (French trial conditions)
GDS3113_tissue_2_8_mod.txt	GEO	GDS3113	-1.23322697797	Homo sapiens	Various normal tissues	tissue	bone marrow	fetal thymus
E-GEOD-34126_43_3_4_mod.txt	ArrayExpress	E-GEOD-34126	2.38904914805	Mus musculus	An Animal Model of Myc-driven medulloblastoma	FactorValue..GENOTYPE.VARIATION.	tumor-bearing mice	wild type
E-GEOD-17794_34_1_2_mod.txt	ArrayExpress	E-GEOD-17794	-3.7706796251	Mus musculus	Expression data from B6C3F1 mice treated with 2-butoxyethanol	FactorValue..TISSUE.	Bone Marrow	Liver
E-GEOD-37566_38_1_2_mod.txt	ArrayExpress	E-GEOD-37566	-1.3118658586	Mus musculus	Dendritic cell and monocyte progenitors	FactorValue..PHENOTYPE.	CD19-CD3-NK1.1-B220-CD11b+CD115+Ly6C+Ly6G-	CD19-CD3-NK1.1-B220-CD11c-CD11b-Sca1-CD135+CD115+CD117hi
E-GEOD-19639_26_1_2_mod.txt	ArrayExpress	E-GEOD-19639	1.16203792907	Homo sapiens	Transcription profiling by array of human estrogen receptor positive breast cancer cell lines after long-term estrogen deprivation	Factor.Value..cell.line.	HCC-1428	MCF-7
E-GEOD-24547_47_1_2_mod.txt	ArrayExpress	E-GEOD-24547	-1.70482630931	Homo sapiens	Transcriptional pathway signatures for the Aurora inhibitor Danusertib	FactorValue..TISSUE.ORIGIN.	Breast	colon
GDS3142_tissue_7_10_mod.txt	GEO	GDS3142	-3.55861993445	Mus musculus	Various tissues	tissue	eye	kidney
E-GEOD-24207_47_7_18_mod.txt	ArrayExpress	E-GEOD-24207	-1.61135052429	Mus musculus	mRNA analysis in different mouse tissues	FactorValue..TISSUE.	heart	salivary gland
E-GEOD-7869_29_1_3_mod.txt	ArrayExpress	E-GEOD-7869	-1.35178995924	Homo sapiens	Transcription profiling by array of human renal cysts from patients with autosomal dominant polycystic kidney disease	Factor.Value.histology.	large cyst	non cystic
E-GEOD-25155_28_1_2_mod.txt	ArrayExpress	E-GEOD-25155	5.17463792859	Homo sapiens	Transcription profiling by array of human kidney and gastrointestinal epithelial cells after treatment with Helicobacter pylori lipopolysaccharide	Factor.Value.cell.line.	AGS	HEK-TLR2
GDS3142_tissue_15_22_mod.txt	GEO	GDS3142	2.93165476867	Mus musculus	Various tissues	tissue	pituitary gland	thymus
E-GEOD-21761_63_1_3_mod.txt	ArrayExpress	E-GEOD-21761	3.55102245661	Mus musculus	A large intergenic non-coding RNA induced by p53 mediates global gene repression in the p53 transcriptional response	FactorValue..AGENT.	4-hydroxytamoxifen	not specified
E-GEOD-24207_47_3_4_mod.txt	ArrayExpress	E-GEOD-24207	-3.59826087041	Mus musculus	mRNA analysis in different mouse tissues	FactorValue..TISSUE.	bone marrow	brain
GDS813_development.stage_1_3_mod.txt	GEO	GDS813	4.12110982838	Mus musculus	Preimplantation embryo development (MOE430A)	development.stage	1-cell	8-cell
GDS3113_tissue_8_15_mod.txt	GEO	GDS3113	-1.39353152897	Homo sapiens	Various normal tissues	tissue	fetal thymus	pancreas
E-GEOD-24207_47_13_23_mod.txt	ArrayExpress	E-GEOD-24207	-1.8050287761	Mus musculus	mRNA analysis in different mouse tissues	FactorValue..TISSUE.	ovary	thymus
E-GEOD-24207_47_8_14_mod.txt	ArrayExpress	E-GEOD-24207	4.19906071774	Mus musculus	mRNA analysis in different mouse tissues	FactorValue..TISSUE.	insulinoma	pancreatic acini
GDS3142_tissue_14_21_mod.txt	GEO	GDS3142	-2.57280036672	Mus musculus	Various tissues	tissue	ovary	testis
E-TABM-1091_29_2_6_mod.txt	ArrayExpress	E-TABM-1091	2.55860387956	Homo sapiens	Transcriptiion profiling by array of human ratiometric mixes of high quality RNA from different tissues using different labeling protocols to provide a mechanism for assessing process improvement	Factor.Value..MIX.	liver only	Universal Human Reference RNA
E-GEOD-24207_47_4_12_mod.txt	ArrayExpress	E-GEOD-24207	2.36350333822	Mus musculus	mRNA analysis in different mouse tissues	FactorValue..TISSUE.	brain	muscle
E-GEOD-24207_47_17_18_mod.txt	ArrayExpress	E-GEOD-24207	-1.75378761275	Mus musculus	mRNA analysis in different mouse tissues	FactorValue..TISSUE.	placenta	salivary gland
GDS2671_time_6_10_mod.txt	GEO	GDS2671	3.70089844245	Mus musculus	Embryonic V6.5 stem cell differentiation in vitro (MG-430A)	time	36 h	7 d
GDS1962_disease.state_2_4_mod.txt	GEO	GDS1962	-2.08506140672	Homo sapiens	Glioma-derived stem cell factor effect on angiogenesis in the brain	disease.state	glioblastomas	oligodendrogliomas
GDS3142_tissue_6_7_mod.txt	GEO	GDS3142	1.64386752703	Mus musculus	Various tissues	tissue	embryonic stem cells	eye
GDS3113_tissue_8_31_mod.txt	GEO	GDS3113	1.3854023688	Homo sapiens	Various normal tissues	tissue	fetal thymus	Universal Human Reference RNA
E-GEOD-24207_47_9_14_mod.txt	ArrayExpress	E-GEOD-24207	-2.05402073912	Mus musculus	mRNA analysis in different mouse tissues	FactorValue..TISSUE.	kidney	pancreatic acini
GDS3142_tissue_2_13_mod.txt	GEO	GDS3142	1.51336036577	Mus musculus	Various tissues	tissue	adrenal gland	muscle
E-GEOD-18281_36_3_5_mod.txt	ArrayExpress	E-GEOD-18281	1.61917779088	Mus musculus	Spatial mapping of thymic stromal microenvironments reveals unique features influencing T lymphoid differentiation	FactorValue..TISSUE.	Peri-medullary cortex	Whole cortex
GDS1695_cell.type_1_4_mod.txt	GEO	GDS1695	1.75250358195	Mus musculus	Self-renewing memory B cell	cell.type	germinal center B cells	plasma B cells
GDS3113_tissue_1_17_mod.txt	GEO	GDS3113	1.67454658792	Homo sapiens	Various normal tissues	tissue	adrenal gland	placenta
GDS3142_tissue_5_8_mod.txt	GEO	GDS3142	2.17535696237	Mus musculus	Various tissues	tissue	diaphragm	fetus
E-GEOD-21278_33_3_9_mod.txt	ArrayExpress	E-GEOD-21278	-1.9142060216	Mus musculus	A genomic atlas of mouse hypothalamic development	Factor.Value..AGE.	embryonic day 12	embryonic day 18
GDS3113_tissue_2_4_mod.txt	GEO	GDS3113	-1.45545280703	Homo sapiens	Various normal tissues	tissue	bone marrow	colon
E-GEOD-27686_35_1_2_mod.txt	ArrayExpress	E-GEOD-27686	1.33054735185	Mus musculus	Accumulating mitochondrial DNA mutations drive premature hematopoietic aging phenotypes molecularly distinct from physiologic stem cell aging	FactorValue..AGE.	24 months	32 weeks
GDS1716_tissue_1_2_mod.txt	GEO	GDS1716	1.57236655961	Mus musculus	SOD1-G93A transgenic model of amyotrophic lateral sclerosis: oculomotor nucleus	tissue	ocular motor neuron	spinal cord
E-GEOD-24207_47_5_18_mod.txt	ArrayExpress	E-GEOD-24207	-1.67974256724	Mus musculus	mRNA analysis in different mouse tissues	FactorValue..TISSUE.	diaphragm	salivary gland
GDS1608_tissue_2_6_mod.txt	GEO	GDS1608	1.36753453633	Rattus norvegicus	Cocaine addiction effect on reward-related brain regions	tissue	lateral hypothalamus	ventral tegmental area
GDS1381_individual_4_5_mod.txt	GEO	GDS1381	-7.43627679186	Homo sapiens	Carboplatin sensitive and resistant ovarian carcinoma	individual	patient 4	patient 5
E-GEOD-29437_46_2_3_mod.txt	ArrayExpress	E-GEOD-29437	2.64803698483	Homo sapiens	Progesterone inhibits epithelial-to-mesenchymal transition in endometrial cancer	FactorValue..PROGRESSIVE.STATUS.	not specified	progressive (recurrence or metastasis)
E-GEOD-16779_23_1_2_mod.txt	ArrayExpress	E-GEOD-16779	3.11316277564	Mus musculus	Undifferentiated Pleomorphic Sarcoma Model	Factor.Value..TISSUE.	Normal Skeletal Muscle	Soft Tissue Sarcoma
E-GEOD-30016_37_1_3_mod.txt	ArrayExpress	E-GEOD-30016	5.12307065778	Mus musculus	Comparison of polysomal profiles of murine adult normal	FactorValue..CELL.TYPE.	Normal cortial olig2 cells	recruited olig2 glioma cells
GDS181_tissue_15_34_mod.txt	GEO	GDS181	2.17302183382	Homo sapiens	Large-scale analysis of the human transcriptome (HG-U95A)	tissue	kidney	THY+
GDS1956_disease.state_5_11_mod.txt	GEO	GDS1956	-1.80821601521	Homo sapiens	Various muscle diseases (HG-U133A)	disease.state	Duchenne muscular dystrophy	normal
E-GEOD-24207_47_6_18_mod.txt	ArrayExpress	E-GEOD-24207	-2.53925602499	Mus musculus	mRNA analysis in different mouse tissues	FactorValue..TISSUE.	eye	salivary gland
E-GEOD-24207_47_5_20_mod.txt	ArrayExpress	E-GEOD-24207	-1.72194864051	Mus musculus	mRNA analysis in different mouse tissues	FactorValue..TISSUE.	diaphragm	small intestine
GDS181_tissue_14_15_mod.txt	GEO	GDS181	-2.00379080474	Homo sapiens	Large-scale analysis of the human transcriptome (HG-U95A)	tissue	HUVEC	kidney
E-GEOD-20033_27_1_3_mod.txt	ArrayExpress	E-GEOD-20033	-1.84586478291	Homo sapiens	Minicircle-derived iPS cells - Affymetrix Data	Factor.Value..CELL.TYPE.	adipose stem cells derived from adult human donor	Human Embryonic Stem Cells
E-GEOD-25162_38_1_2_mod.txt	ArrayExpress	E-GEOD-25162	-7.78697295349	Homo sapiens	Functional analyses of miR-210 involvement in the aggressive phenotype of high grade breast tumors	FactorValue..ESTROGEN.RECEPTOR.STATUS.	ER-negative	ER-positive
E-GEOD-24637_42_1_2_mod.txt	ArrayExpress	E-GEOD-24637	-6.7102492344	Mus musculus	Genetic and genomic analysis of hyperlipidemia	FactorValue..TISSUE.	Adipose	liver
E-GEOD-17796_33_1_2_mod.txt	ArrayExpress	E-GEOD-17796	-4.44290956061	Mus musculus	Expression data from B6C3F1 mice treated with reduced oxygen	FactorValue..TISSUE.	Bone Marrow	Liver
E-GEOD-29437_46_1_2_mod.txt	ArrayExpress	E-GEOD-29437	-3.90125374933	Homo sapiens	Progesterone inhibits epithelial-to-mesenchymal transition in endometrial cancer	FactorValue..PROGRESSIVE.STATUS.	non-progressive (no recurrence or metastasis)	not specified
GDS3491_genotype_variation_1_2_mod.txt	GEO	GDS3491	-2.93868354326	Mus musculus	Aire ectopic expression effect on pancreatic islet beta cells	genotype_variation	Aire null	non-transgenic control
GDS2819_individual_15_19_mod.txt	GEO	GDS2819	2.53008141834	Homo sapiens	Leukemic white blood cells and various RNA preparation protocols	individual	patient 22	patient 26
E-GEOD-28887_40_1_2_mod.txt	ArrayExpress	E-GEOD-28887	-1.02455449756	Mus musculus	Gene expression profile of Age associated B cells	FactorValue..TISSUE.SOURCE.	peritoneal cavity	spleen
GDS169_tissue_1_2_mod.txt	GEO	GDS169	-1.52967062705	Mus musculus	Dietary effects of long chain polyunsaturated fatty acids (Mu11K-B)	tissue	hippocampus	liver
GDS3113_tissue_11_26_mod.txt	GEO	GDS3113	2.03577146192	Homo sapiens	Various normal tissues	tissue	liver	testis
GDS3113_tissue_2_21_mod.txt	GEO	GDS3113	-2.25810982539	Homo sapiens	Various normal tissues	tissue	bone marrow	skeletal muscle
GDS3113_tissue_9_32_mod.txt	GEO	GDS3113	1.13444727033	Homo sapiens	Various normal tissues	tissue	heart	uterus
GDS2819_disease.state_5_6_mod.txt	GEO	GDS2819	-2.15849050314	Homo sapiens	Leukemic white blood cells and various RNA preparation protocols	disease.state	AML with t 11q23, MLL	c-ALL, Pre-B-ALL without t 9,22
GDS3113_tissue_3_24_mod.txt	GEO	GDS3113	1.00214188353	Homo sapiens	Various normal tissues	tissue	brain	spinal cord
E-GEOD-24207_47_1_23_mod.txt	ArrayExpress	E-GEOD-24207	-2.34000725	Mus musculus	mRNA analysis in different mouse tissues	FactorValue..TISSUE.	adipose tissue	thymus
GDS3113_tissue_1_14_mod.txt	GEO	GDS3113	2.2443615746	Homo sapiens	Various normal tissues	tissue	adrenal gland	ovary
E-GEOD-24207_47_2_21_mod.txt	ArrayExpress	E-GEOD-24207	2.41525946713	Mus musculus	mRNA analysis in different mouse tissues	FactorValue..TISSUE.	adrenal gland	spleen
E-GEOD-24207_47_1_8_mod.txt	ArrayExpress	E-GEOD-24207	-9.36540819468	Mus musculus	mRNA analysis in different mouse tissues	FactorValue..TISSUE.	adipose tissue	insulinoma
E-GEOD-35366_38_1_2_mod.txt	ArrayExpress	E-GEOD-35366	-1.28317077277	Mus musculus	Global developmental gene expression and pathway analysis of normal brain development and mouse models of human neuronal migration defects	FactorValue..GENOTYPE.	mutant 14-3-3 ko/ko	mutant 14-3-3 ko/ko inbred
E-GEOD-18486_38_1_2_mod.txt	ArrayExpress	E-GEOD-18486	-1.44232125703	Homo sapiens	CDK inhibitors PHA-848125 and PHA-690509 profiling on A2780	FactorValue..TREATMENT.	CDk-125	CDk-509
E-GEOD-24207_47_12_13_mod.txt	ArrayExpress	E-GEOD-24207	1.47607812521	Mus musculus	mRNA analysis in different mouse tissues	FactorValue..TISSUE.	muscle	ovary
GDS2261_agent_1_7_mod.txt	GEO	GDS2261	-1.06020461441	Rattus norvegicus	Liver response to various toxins	agent	alpha-naphthylisothiocyanate	untreated
E-GEOD-24207_47_2_11_mod.txt	ArrayExpress	E-GEOD-24207	3.36044185407	Mus musculus	mRNA analysis in different mouse tissues	FactorValue..TISSUE.	adrenal gland	lung
GDS2958_cell.type_1_3_mod.txt	GEO	GDS2958	6.49285163515	Homo sapiens	Tumor suppressor PTEN depletion effect on various cell lines	cell.type	epidermoid carcinoma	non-small cell lung carcinoma
E-GEOD-24512_28_1_2_mod.txt	ArrayExpress	E-GEOD-24512	-1.27280762704	Mus musculus	Expression variation in the mouse retina	FactorValue..DEVELOPMENT.AGE.	E18.5	P30.5
E-GEOD-23006_47_1_5_mod.txt	ArrayExpress	E-GEOD-23006	1.09384117478	Mus musculus	Transcriptional profiling of a wound healing process in skin and oral mucosa	FactorValue..TIME.POST.WOUND.	0 hr	3 days
E-GEOD-32681_37_1_2_mod.txt	ArrayExpress	E-GEOD-32681	-1.11870255017	Mus musculus	Alterations in gene expression in lacrimal and salivary glands of male NOD mice due to LTBR-Ig treatment relative to control antibody	FactorValue..TISSUE.	Lacrimal gland	Salivary gland
E-GEOD-33167_31_2_3_mod.txt	ArrayExpress	E-GEOD-33167	1.38893882136	Homo sapiens	Phenotypic Plasticity in Aggressive Triple-Negative Breast Cancer: Human Biology is Recapitulated by a Novel Model System	FactorValue..CELL.LINE.	Human breast cancer-derived cell line HMEC	Human breast cancer-derived cell line MDA-MB-231
E-GEOD-25488_40_3_5_mod.txt	ArrayExpress	E-GEOD-25488	2.19767679051	Mus musculus	Expression data from C3(1)Tag mammary tumors	FactorValue..GENOTYPE.	Her2/Neu	p53 KO ER neg
E-GEOD-24207_47_13_17_mod.txt	ArrayExpress	E-GEOD-24207	-1.42697517855	Mus musculus	mRNA analysis in different mouse tissues	FactorValue..TISSUE.	ovary	placenta
E-GEOD-23006_47_5_7_mod.txt	ArrayExpress	E-GEOD-23006	-1.1981243003	Mus musculus	Transcriptional profiling of a wound healing process in skin and oral mucosa	FactorValue..TIME.POST.WOUND.	3 days	6 hrs
GDS3113_tissue_12_20_mod.txt	GEO	GDS3113	-2.76430743812	Homo sapiens	Various normal tissues	tissue	lung	salivary gland
GDS3142_tissue_1_7_mod.txt	GEO	GDS3142	-1.03673419292	Mus musculus	Various tissues	tissue	adipose tissue	eye
E-GEOD-15129_29_2_4_mod.txt	ArrayExpress	E-GEOD-15129	-3.11094092565	Mus musculus	Coenzyme Q10-dependent gene expression in SAMP1 mice tissues	Factor.Value..TISSUE.	heart	liver
E-GEOD-18552_60_3_5_mod.txt	ArrayExpress	E-GEOD-18552	-1.89042441088	Homo sapiens	CDK inhibitors and flavopiridol profiling on A2780 and MCF7 cells	FactorValue..TREATMENT.	CDk-125	CDk-509
GDS3499_agent_2_3_mod.txt	GEO	GDS3499	-1.40266942389	Homo sapiens	TREM-1 activation effect on monocytes in vitro	agent	anti-Trem-1 Ab and LPS	control Ab
GDS3102_tissue_1_2_mod.txt	GEO	GDS3102	1.90302985228	Rattus norvegicus	Caloric restriction effect on the aged heart and adipose tissue	tissue	heart	white adipose tissue
E-GEOD-8167_40_1_2_mod.txt	ArrayExpress	E-GEOD-8167	-1.3811660264	Homo sapiens	Transcription profiling by array of human gastrointestinal stromal tumors with KIT mutations	Factor.Value.ORGANISM.PART.	small intestine	stomach
E-GEOD-24207_47_5_16_mod.txt	ArrayExpress	E-GEOD-24207	-3.21675761564	Mus musculus	mRNA analysis in different mouse tissues	FactorValue..TISSUE.	diaphragm	pituitary gland
E-MEXP-2539_26_3_8_mod.txt	ArrayExpress	E-MEXP-2539	3.52792863012	Mus musculus	Transcription profiling in primary mouse hepatocytes discriminates between true and false genotoxic compounds	Factor.Value.COMPOUND.	4-NP	EtOH
E-GEOD-24207_47_8_9_mod.txt	ArrayExpress	E-GEOD-24207	5.07663021138	Mus musculus	mRNA analysis in different mouse tissues	FactorValue..TISSUE.	insulinoma	kidney
GDS638_age_2_3_mod.txt	GEO	GDS638	-1.21845637046	Mus musculus	Dystrophin-deficient mdx diaphram muscle development time course	age	14 day	23 day
E-GEOD-24207_47_6_20_mod.txt	ArrayExpress	E-GEOD-24207	-2.58146209825	Mus musculus	mRNA analysis in different mouse tissues	FactorValue..TISSUE.	eye	small intestine
GDS3113_tissue_30_32_mod.txt	GEO	GDS3113	1.06984845613	Homo sapiens	Various normal tissues	tissue	trachea	uterus
E-GEOD-24207_47_14_21_mod.txt	ArrayExpress	E-GEOD-24207	5.23184512608	Mus musculus	mRNA analysis in different mouse tissues	FactorValue..TISSUE.	pancreatic acini	spleen
E-GEOD-22798_35_1_2_mod.txt	ArrayExpress	E-GEOD-22798	2.90264398231	Mus musculus	Expression data from Pax7+ satellite cell derived tumors in vitro and in vivo	FactorValue..GENOTYPE.	littermate control	Pax7CE/+;LSL-KrasG12D/+;Trp53Fl/+
GDS1381_individual_3_5_mod.txt	GEO	GDS1381	-7.81141265516	Homo sapiens	Carboplatin sensitive and resistant ovarian carcinoma	individual	patient 3	patient 5
GDS988_cell.line_1_2_mod.txt	GEO	GDS988	-8.95303875766	Homo sapiens	Kaposi's sarcoma-associated herpesvirus LANA overexpression in B lymphoid cells: time course	cell.line	293	BJAB
E-GEOD-32334_31_5_6_mod.txt	ArrayExpress	E-GEOD-32334	-2.7498170328	Mus musculus	Developmental timecourse of mouse ocular lens and whole embryo control	FactorValue..STAGE.	E12.5	E13.5
E-GEOD-22506_20_1_3_mod.txt	ArrayExpress	E-GEOD-22506	-1.42935058464	Mus musculus	Unacylated Ghrelin Rapidly Modulates Lipogenic and Insulin Signaling Pathway Gene Expression in Metabolically Active Tissues of GHSR Deleted Mice	Factor.Value..TISSUE.	Gonadal white adipose tissue	Skeletal muscle (M. vastus lateralis)
GDS3113_tissue_17_29_mod.txt	GEO	GDS3113	-1.16680567061	Homo sapiens	Various normal tissues	tissue	placenta	tonsil
GDS3142_tissue_10_19_mod.txt	GEO	GDS3142	1.29849079249	Mus musculus	Various tissues	tissue	kidney	small intestine
E-MEXP-858_46_1_4_mod.txt	ArrayExpress	E-MEXP-858	-1.06875562202	Homo sapiens	Transcription profiling time series of human mesenchymal stem cells after induction of differentiation	Factor.Value..time.after.induction.	0	7
GDS589_tissue_2_4_mod.txt	GEO	GDS589	1.58680909893	Rattus norvegicus	Multiple normal tissue gene expression across strains	tissue	amygdala central nucleus	cerebellum
E-GEOD-32966_37_2_6_mod.txt	ArrayExpress	E-GEOD-32966	-2.69436660953	Mus musculus	Dermal reprogramming through epidermal activation of beta-catenin	FactorValue..SORTED.CELL.POPULATION.	GFP+ sustained activated D2 dermal fibroblasts	ItgA6+ sustained activated D2 epidermal keratinocytes
E-GEOD-30516_31_1_2_mod.txt	ArrayExpress	E-GEOD-30516	-3.69927254739	Homo sapiens	Dynamic re-wiring of apoptotic signaling networks enhances tumor cell killing by DNA damage	FactorValue..CELL.LINE.	BT20	MCF
E-MEXP-3111_38_1_2_mod.txt	ArrayExpress	E-MEXP-3111	5.88075759255	Homo sapiens	Interactome of Human Embryo Implantation: Identification of Gene Expression Pathways, Regulation, and Integrated Regulatory Networks.	Factor.Value.Phase.		proliferative
E-GEOD-30220_36_1_2_mod.txt	ArrayExpress	E-GEOD-30220	3.76305415862	Homo sapiens	Global gene-expression profiles analysis of iPSCs	FactorValue..DERIVATION.	a Chinese female blastocyst	beta-thalassemia patient
E-GEOD-37316_36_1_3_mod.txt	ArrayExpress	E-GEOD-37316	-2.19443160644	Mus musculus	Gene expression data from postnatal day 7 subventricular zone (SVZ)	FactorValue..CELL.TYPE.	cancer stem cells (CSCs)	not specified
GDS3113_tissue_8_32_mod.txt	GEO	GDS3113	1.66738137946	Homo sapiens	Various normal tissues	tissue	fetal thymus	uterus
E-GEOD-37316_36_2_3_mod.txt	ArrayExpress	E-GEOD-37316	-2.43918351889	Mus musculus	Gene expression data from postnatal day 7 subventricular zone (SVZ)	FactorValue..CELL.TYPE.	neural stem cells (NSCs)	not specified
GDS1608_tissue_1_4_mod.txt	GEO	GDS1608	-1.1031106275	Rattus norvegicus	Cocaine addiction effect on reward-related brain regions	tissue	amygdala	nucleus accumbens
E-GEOD-24207_47_16_19_mod.txt	ArrayExpress	E-GEOD-24207	2.82037316626	Mus musculus	mRNA analysis in different mouse tissues	FactorValue..TISSUE.	pituitary gland	seminal vesicle
E-GEOD-25700_43_1_2_mod.txt	ArrayExpress	E-GEOD-25700	1.70605039185	Mus musculus	Comparative analysis of mouse cardiac gene expression: diet	FactorValue..DIET.	casein	soy
E-GEOD-24207_47_9_18_mod.txt	ArrayExpress	E-GEOD-24207	1.02712554162	Mus musculus	mRNA analysis in different mouse tissues	FactorValue..TISSUE.	kidney	salivary gland
GDS3113_tissue_5_12_mod.txt	GEO	GDS3113	2.13127068747	Homo sapiens	Various normal tissues	tissue	fetal brain	lung
E-TABM-672_24_1_9_mod.txt	ArrayExpress	E-TABM-672	5.22839423307	Mus musculus	Transcription profiling of mouse embyronic stem cell line CGR8 during the first 10 days of differentiation into embryoid bodies	Factor.Value..Age.	0	10
GDS2159_protocol_1_2_mod.txt	GEO	GDS2159	-1.78390357885	Mus musculus	Spinal cord injury model: time course	protocol	moderate injury	naive
E-GEOD-22798_37_1_2_mod.txt	ArrayExpress	E-GEOD-22798	2.88235998155	Mus musculus	Expression data from Pax7+ satellite cell derived tumors in vitro and in vivo	FactorValue..TISSUE.	Muscle	Tumor
GDS2666_time_3_5_mod.txt	GEO	GDS2666	-1.73042885446	Mus musculus	Embryonic R1 stem cell differentiation in vitro (MG-430A)	time	14 d	24 h
E-GEOD-37546_36_1_2_mod.txt	ArrayExpress	E-GEOD-37546	-1.8166092204	Mus musculus	Disturbed Hepatic Carbohydrate Management During High Metabolic Demand in Medium-Chain Acyl-CoA Dehydrogenase (MCAD)-deficient Mice	FactorValue..TREATMENT.	LPS	vehicle
E-GEOD-21278_33_1_9_mod.txt	ArrayExpress	E-GEOD-21278	-1.25643394442	Mus musculus	A genomic atlas of mouse hypothalamic development	Factor.Value..AGE.	embryonic day 10	embryonic day 18
E-GEOD-24207_47_15_17_mod.txt	ArrayExpress	E-GEOD-24207	3.58836306514	Mus musculus	mRNA analysis in different mouse tissues	FactorValue..TISSUE.	pancreatic islets	placenta
GDS1490_tissue_26_34_mod.txt	GEO	GDS1490	-1.56373269033	Mus musculus	Neural tissue profiling	tissue	retina	white adipose tissue
E-GEOD-21299_35_1_4_mod.txt	ArrayExpress	E-GEOD-21299	1.52107329085	Mus musculus	Expression data from murine cell line transduced with epitope tagged forms of Hoxa9	FactorValue..TIME.POINT.	day 0	day 5
E-GEOD-30747_51_1_2_mod.txt	ArrayExpress	E-GEOD-30747	-1.82081525654	Mus musculus	AML mouse models	FactorValue..TREATMENT.	doxycycline	not specified
GDS611_disease.state_1_2_mod.txt	GEO	GDS611	-1.39683027118	Homo sapiens	Duchenne muscular dystrophy (II) (HG-U95D)	disease.state	Duchenne muscular dystrophy	normal
GDS3516_disease.state_1_7_mod.txt	GEO	GDS3516	-1.3349917723	Homo sapiens	Nodular lymphocyte-predominant Hodgkin lymphoma: lymphocytic and histiocytic cells	disease.state	Burkitt lymphoma	normal centrocytes
GDS589_tissue_5_18_mod.txt	GEO	GDS589	-1.84273245387	Rattus norvegicus	Multiple normal tissue gene expression across strains	tissue	cerebral cortex	nucleus accumbens core
GDS3113_tissue_4_19_mod.txt	GEO	GDS3113	2.5779190559	Homo sapiens	Various normal tissues	tissue	colon	retina
GDS1491_agent_1_3_mod.txt	GEO	GDS1491	-1.28758344769	Rattus norvegicus	Calcineurin overexpression effect on astrocytes	agent	activated calcineurin	lacZ
E-GEOD-30122_44_1_2_mod.txt	ArrayExpress	E-GEOD-30122	-2.30006224755	Homo sapiens	Transcriptome Analysis of Human Diabetic Kidney Disease	FactorValue..TISSUE.SUBREGION.	glomerulus	tubules
E-GEOD-34126_42_3_4_mod.txt	ArrayExpress	E-GEOD-34126	2.10990589081	Mus musculus	An Animal Model of Myc-driven medulloblastoma	FactorValue..CELL.TYPE.	Myc/DNp53-infected Prom1+Lin- cells	not specified
GDS3113_tissue_19_21_mod.txt	GEO	GDS3113	-3.38057607426	Homo sapiens	Various normal tissues	tissue	retina	skeletal muscle
E-GEOD-32334_31_4_5_mod.txt	ArrayExpress	E-GEOD-32334	1.54695670613	Mus musculus	Developmental timecourse of mouse ocular lens and whole embryo control	FactorValue..STAGE.	E11.5-13.5	E12.5
GDS3113_tissue_19_20_mod.txt	GEO	GDS3113	-3.26262617834	Homo sapiens	Various normal tissues	tissue	retina	salivary gland
E-GEOD-29766_37_2_4_mod.txt	ArrayExpress	E-GEOD-29766	-1.15021312164	Mus musculus	Developmental profiling of spiral ganglion neurons reveals insights into auditory circuit assembly	FactorValue..DEVELOPMENT.STAGE.	E13	P0
GDS3142_tissue_1_11_mod.txt	GEO	GDS3142	-5.03285276829	Mus musculus	Various tissues	tissue	adipose tissue	liver
GDS3113_tissue_21_25_mod.txt	GEO	GDS3113	1.98708402841	Homo sapiens	Various normal tissues	tissue	skeletal muscle	spleen
GDS3142_tissue_14_15_mod.txt	GEO	GDS3142	-4.02871660169	Mus musculus	Various tissues	tissue	ovary	pituitary gland
E-GEOD-25155_28_2_3_mod.txt	ArrayExpress	E-GEOD-25155	-5.9599484917	Homo sapiens	Transcription profiling by array of human kidney and gastrointestinal epithelial cells after treatment with Helicobacter pylori lipopolysaccharide	Factor.Value.cell.line.	HEK-TLR2	MKN45
E-GEOD-19780_33_1_2_mod.txt	ArrayExpress	E-GEOD-19780	-3.07649593073	Mus musculus	A novel approach to investigate tissue-specific trinucleotide repeat instability	FactorValue..TISSUE.	cerebellum	striatum
GDS3113_tissue_5_25_mod.txt	GEO	GDS3113	1.23609738184	Homo sapiens	Various normal tissues	tissue	fetal brain	spleen
GDS3113_tissue_26_28_mod.txt	GEO	GDS3113	1.13749290903	Homo sapiens	Various normal tissues	tissue	testis	thyroid
E-GEOD-23006_47_7_8_mod.txt	ArrayExpress	E-GEOD-23006	1.09219430903	Mus musculus	Transcriptional profiling of a wound healing process in skin and oral mucosa	FactorValue..TIME.POST.WOUND.	6 hrs	7 days
GDS1490_tissue_29_32_mod.txt	GEO	GDS1490	1.0772885947	Mus musculus	Neural tissue profiling	tissue	spleen	testes
E-GEOD-29458_33_2_3_mod.txt	ArrayExpress	E-GEOD-29458	-3.96961792939	Mus musculus	Expression data from PDGF driven mouse tumors	FactorValue..GENOTYPE.	Ptenf/f; p53f/f	wild type
GDS3592_disease.state_1_2_mod.txt	GEO	GDS3592	-2.77820637695	Homo sapiens	Ovarian normal surface epithelia and ovarian cancer epithelial cells	disease.state	normal	ovarian adenocarcinoma
GDS520_age_2_3_mod.txt	GEO	GDS520	-1.31596246925	Rattus norvegicus	Hippocampal aging and cognitive impairment	age	24 months	4 months
E-GEOD-34208_40_1_2_mod.txt	ArrayExpress	E-GEOD-34208	-1.66963566121	Mus musculus	Expression data of mouse ENCCs and mouse embryonic Gut E14.5	FactorValue..CELL.TYPE.	enteric neural crest cells	enteric neural crest cells from embryonic gut
E-GEOD-27973_41_2_4_mod.txt	ArrayExpress	E-GEOD-27973	5.2141113594	Homo sapiens	Human airway epithelial responses to rhinovirus infection and cigarette smoke extract alone and in combination	FactorValue..DONOR.	2	4
E-MTAB-125_19_1_2_mod.txt	ArrayExpress	E-MTAB-125	2.98301758776	Mus musculus	Transcription profiling of mouse erythroleukemia cells following activation of Gata1-ER or PU.1-ER transgenes	Factor.Value..GENOTYPE.	GER transgene	PUER transgene
E-GEOD-32966_37_1_6_mod.txt	ArrayExpress	E-GEOD-32966	-2.31576077417	Mus musculus	Dermal reprogramming through epidermal activation of beta-catenin	FactorValue..SORTED.CELL.POPULATION.	GFP+ neonatal dermal fibroblasts	ItgA6+ sustained activated D2 epidermal keratinocytes
GDS3113_tissue_9_21_mod.txt	GEO	GDS3113	-1.55781695655	Homo sapiens	Various normal tissues	tissue	heart	skeletal muscle
E-GEOD-21278_33_2_12_mod.txt	ArrayExpress	E-GEOD-21278	-3.52436385174	Mus musculus	A genomic atlas of mouse hypothalamic development	Factor.Value..AGE.	embryonic day 11	postnatal day 42
E-GEOD-16249_46_1_2_mod.txt	ArrayExpress	E-GEOD-16249	-1.3971980782	Homo sapiens	siRNA-mediated knockdown of MITF and PAX3 in metastatic melanoma cell lines	FactorValue..TUMOUR.SITE.	neck nodule	small intestine
E-GEOD-24207_47_11_16_mod.txt	ArrayExpress	E-GEOD-24207	-4.48761751748	Mus musculus	mRNA analysis in different mouse tissues	FactorValue..TISSUE.	lung	pituitary gland
E-GEOD-23009_38_1_2_mod.txt	ArrayExpress	E-GEOD-23009	3.01785625558	Mus musculus	Effect of intra-cytoplasmic sperm injection (ICSI) on gene expression and development of mouse preimplantation embryos	FactorValue..GROUP.	Embryos produced in vivo	ICSI embryos cultured in KSOMaa
GDS3113_tissue_27_28_mod.txt	GEO	GDS3113	1.19926538848	Homo sapiens	Various normal tissues	tissue	thymus	thyroid
GDS3113_tissue_4_6_mod.txt	GEO	GDS3113	1.01887132594	Homo sapiens	Various normal tissues	tissue	colon	fetal kidney
GDS3113_tissue_22_26_mod.txt	GEO	GDS3113	-1.35284744199	Homo sapiens	Various normal tissues	tissue	skin	testis
GDS3113_tissue_12_27_mod.txt	GEO	GDS3113	-1.50684117201	Homo sapiens	Various normal tissues	tissue	lung	thymus
E-GEOD-13062_27_2_4_mod.txt	ArrayExpress	E-GEOD-13062	1.24586486518	Mus musculus	The effects of temporally restricted feeding on hepatic gene expression of Cry1	FactorValue..STRAIN.OR.LINE.	Cry1,Cry2 double KO mice, Gender: male, Age: 8-16 weeks, Condition: ad libitum food availability	Cry1,Cry2 double KO, Gender: female, Age: 8-16 weeks, Condition: temporally restricted food availability CT1(25)-CT9(33)
GDS3142_tissue_15_21_mod.txt	GEO	GDS3142	1.91239725538	Mus musculus	Various tissues	tissue	pituitary gland	testis
E-GEOD-24207_47_3_16_mod.txt	ArrayExpress	E-GEOD-24207	-3.70048201893	Mus musculus	mRNA analysis in different mouse tissues	FactorValue..TISSUE.	bone marrow	pituitary gland
E-GEOD-21278_33_2_10_mod.txt	ArrayExpress	E-GEOD-21278	-2.42229762164	Mus musculus	A genomic atlas of mouse hypothalamic development	Factor.Value..AGE.	embryonic day 11	postnatal day 0
GDS3113_tissue_15_30_mod.txt	GEO	GDS3113	1.99106445231	Homo sapiens	Various normal tissues	tissue	pancreas	trachea
GDS813_development.stage_3_5_mod.txt	GEO	GDS813	-4.09054589087	Mus musculus	Preimplantation embryo development (MOE430A)	development.stage	8-cell	oocyte
E-GEOD-24207_47_15_20_mod.txt	ArrayExpress	E-GEOD-24207	2.18443326321	Mus musculus	mRNA analysis in different mouse tissues	FactorValue..TISSUE.	pancreatic islets	small intestine
E-TABM-1091_29_5_6_mod.txt	ArrayExpress	E-TABM-1091	1.24499677479	Homo sapiens	Transcriptiion profiling by array of human ratiometric mixes of high quality RNA from different tissues using different labeling protocols to provide a mechanism for assessing process improvement	Factor.Value..MIX.	skeletal muscle only	Universal Human Reference RNA
GDS3113_tissue_12_16_mod.txt	GEO	GDS3113	-1.49546058387	Homo sapiens	Various normal tissues	tissue	lung	peripheral blood lymphocyte
E-GEOD-24207_47_11_22_mod.txt	ArrayExpress	E-GEOD-24207	-2.69974689589	Mus musculus	mRNA analysis in different mouse tissues	FactorValue..TISSUE.	lung	testis
E-GEOD-38754_39_1_2_mod.txt	ArrayExpress	E-GEOD-38754	-2.66540110357	Mus musculus	Temporal changes of gene expression in mouse heart	FactorValue..ORGANISM.PART.	heart	kidney
GDS1054_age_3_5_mod.txt	GEO	GDS1054	2.67420015281	Rattus norvegicus	Iron deficiency effect on duodenum: time course (RAE230A)	age	36 wk	8 d
GDS3142_tissue_9_18_mod.txt	GEO	GDS3142	-1.64094117808	Mus musculus	Various tissues	tissue	heart	seminal vesicle
E-GEOD-13093_28_3_8_mod.txt	ArrayExpress	E-GEOD-13093	-2.66437829673	Mus musculus	Feeding schedule and the circadian clock shape rhythms in hepatic gene expression	FactorValue..STRAIN.OR.LINE.	C57/B6, Gender: male, Age: 8-12 weeks, Condition:: Fed	Cry1,Cry2 double KO, Gender: male, Age: 8-16 weeks, Condition: temporally restricted food availability CT1(25)-CT9(33)
E-GEOD-24207_47_10_13_mod.txt	ArrayExpress	E-GEOD-24207	5.19732120252	Mus musculus	mRNA analysis in different mouse tissues	FactorValue..TISSUE.	liver	ovary
GDS589_tissue_4_20_mod.txt	GEO	GDS589	-2.99525330446	Rattus norvegicus	Multiple normal tissue gene expression across strains	tissue	cerebellum	nucleus accumbens whole
E-GEOD-24207_47_6_16_mod.txt	ArrayExpress	E-GEOD-24207	-4.07627107338	Mus musculus	mRNA analysis in different mouse tissues	FactorValue..TISSUE.	eye	pituitary gland
E-MEXP-1103_31_1_3_mod.txt	ArrayExpress	E-MEXP-1103	-1.95032784593	Homo sapiens	Transcription profiling of normal human monocytes in response to Aspergillus fumigatus	Factor.Value..GrowthCondition.	10 ng/ml LPS in media	media only
E-GEOD-24628_22_2_3_mod.txt	ArrayExpress	E-GEOD-24628	-1.51211232309	Mus musculus	Subtypes of medulloblastoma have distinct developmental origins	Factor.Value..CELL.TYPE.	medulloblastoma generated by activating Ctnnb1	medulloblastoma generated by inactivating Ptch1
E-TABM-669_25_3_4_mod.txt	ArrayExpress	E-TABM-669	-3.66764984084	Mus musculus	Transcription profiling of mouse embryonic stem cell line Sox1Tv2 during neuronal differentiation	Factor.Value..Age.d..	E14+14 days	E14+3 days
GDS2819_individual_7_18_mod.txt	GEO	GDS2819	1.6935696155	Homo sapiens	Leukemic white blood cells and various RNA preparation protocols	individual	patient 15	patient 25
E-GEOD-27291_39_1_2_mod.txt	ArrayExpress	E-GEOD-27291	1.25098325753	Homo sapiens	Expression data from human TCRVg9-positive gamma delta T lymphocytes	FactorValue..SAMPLE.TYPE.	peripheral blood lymphocytes isolated and activated in vitro for 6 hrs	peripheral blood lymphocytes isolated and activated in vitro for 7 days
GDS1956_disease.state_5_12_mod.txt	GEO	GDS1956	-1.44658916162	Homo sapiens	Various muscle diseases (HG-U133A)	disease.state	Duchenne muscular dystrophy	spastic paraplegia
E-GEOD-35961_34_1_3_mod.txt	ArrayExpress	E-GEOD-35961	-1.81474027127	Mus musculus	Expression data from mouse liver treated with metformin	FactorValue..DIET.	MCD + HF diet mixed with 0.1% metformin (nash metformin)	normal chow (normal)
E-GEOD-23952_40_1_2_mod.txt	ArrayExpress	E-GEOD-23952	-1.21948538819	Homo sapiens	Expression data from TGF-beta treated Panc-1 pancreatic adenocarcinoma cell line	FactorValue..TREATMENT.GROUP.	TGF Treated 48 hr	Untreated Control
GDS2819_individual_20_26_mod.txt	GEO	GDS2819	1.81814601223	Homo sapiens	Leukemic white blood cells and various RNA preparation protocols	individual	patient 27	patient 8
E-GEOD-23408_38_1_2_mod.txt	ArrayExpress	E-GEOD-23408	3.91430096008	Mus musculus	Global gene expression profiles and the progression of pro- and anti-inflammatory pathways in mouse models	FactorValue..TISSUE.	liver	lung
GDS968_individual_40_49_mod.txt	GEO	GDS968	3.00094857526	Homo sapiens	Radiation therapy toxicity association with abnormal transcriptional response to DNA damage	individual	RadS7	SkCa15
E-GEOD-15580_36_1_2_mod.txt	ArrayExpress	E-GEOD-15580	3.18585988217	Mus musculus	Molecular Signatures of Fetal and Adult Prostate Stem Cells	FactorValue..AGE.	16-day-old	adult (6-8 weeks)
E-GEOD-24207_47_13_22_mod.txt	ArrayExpress	E-GEOD-24207	-2.70802330385	Mus musculus	mRNA analysis in different mouse tissues	FactorValue..TISSUE.	ovary	testis
E-GEOD-17796_33_2_3_mod.txt	ArrayExpress	E-GEOD-17796	3.70161832883	Mus musculus	Expression data from B6C3F1 mice treated with reduced oxygen	FactorValue..TISSUE.	Liver	Spleen
GDS3142_tissue_6_15_mod.txt	GEO	GDS3142	-2.21931682506	Mus musculus	Various tissues	tissue	embryonic stem cells	pituitary gland
GDS2609_disease.state_1_2_mod.txt	GEO	GDS2609	-1.51836425471	Homo sapiens	Early onset colorectal cancer: normal-appearing colonic mucosa	disease.state	early onset colorectal cancer	healthy control
E-GEOD-32334_31_3_4_mod.txt	ArrayExpress	E-GEOD-32334	-1.2922557479	Mus musculus	Developmental timecourse of mouse ocular lens and whole embryo control	FactorValue..STAGE.	E11.5	E11.5-13.5
GDS3113_tissue_18_31_mod.txt	GEO	GDS3113	1.30138022023	Homo sapiens	Various normal tissues	tissue	prostate	Universal Human Reference RNA
GDS3142_tissue_11_16_mod.txt	GEO	GDS3142	3.28395900649	Mus musculus	Various tissues	tissue	liver	placenta
GDS3142_tissue_1_15_mod.txt	GEO	GDS3142	-4.26742964603	Mus musculus	Various tissues	tissue	adipose tissue	pituitary gland
E-GEOD-32334_31_1_6_mod.txt	ArrayExpress	E-GEOD-32334	-1.90605625364	Mus musculus	Developmental timecourse of mouse ocular lens and whole embryo control	FactorValue..STAGE.	E10.5	E13.5
E-GEOD-27987_35_4_5_mod.txt	ArrayExpress	E-GEOD-27987	-2.64115073438	Mus musculus	Differential pre-mRNA processing in Crebbp+/- mice	FactorValue..CELL.TYPE.	Crebbp+/- MEF	Crebbp+/+ FLHSC
E-GEOD-29137_36_1_2_mod.txt	ArrayExpress	E-GEOD-29137	8.25309957259	Homo sapiens	Numb variant specific transcriptome analysis	FactorValue..CELL.LINE.	MCF7	MDA-MB-231
E-GEOD-35366_38_2_8_mod.txt	ArrayExpress	E-GEOD-35366	-2.36354709685	Mus musculus	Global developmental gene expression and pathway analysis of normal brain development and mouse models of human neuronal migration defects	FactorValue..GENOTYPE.	mutant 14-3-3 ko/ko inbred	mutant Ndel ko/+ mix background
GDS3142_tissue_3_17_mod.txt	GEO	GDS3142	-2.14315077181	Mus musculus	Various tissues	tissue	bone marrow	salivary gland
E-GEOD-20033_27_1_4_mod.txt	ArrayExpress	E-GEOD-20033	-2.60443656271	Homo sapiens	Minicircle-derived iPS cells - Affymetrix Data	Factor.Value..CELL.TYPE.	adipose stem cells derived from adult human donor	iPSC derived from hASC using lentiviral reprogramming vector
GDS2277_other_1_2_mod.txt	GEO	GDS2277	-2.05404903048	Mus musculus	Ribonucleoprotein- and polysome-associated mRNAs of the testis: time-course	other	polysome	RNP
GDS1381_individual_2_5_mod.txt	GEO	GDS1381	-7.57348808834	Homo sapiens	Carboplatin sensitive and resistant ovarian carcinoma	individual	patient 2	patient 5
E-GEOD-15794_61_1_2_mod.txt	ArrayExpress	E-GEOD-15794	2.22665062557	Mus musculus	Gene expression profiles of E13 bladder neck/urethral compartments (GUDMAP Series ID: 25)	FactorValue..TISSUE.	bladder neck/urethral epithelium	bladder neck/urethral mesenchyme
GDS2671_time_2_10_mod.txt	GEO	GDS2671	3.15697352557	Mus musculus	Embryonic V6.5 stem cell differentiation in vitro (MG-430A)	time	12 h	7 d
E-GEOD-19402_34_1_2_mod.txt	ArrayExpress	E-GEOD-19402	-1.56938956902	Mus musculus	Gene expression data from hippocampus	FactorValue..TISSUE.TYPE.	cortex	Drd1-MSNs
GDS2819_individual_19_27_mod.txt	GEO	GDS2819	-1.52960221041	Homo sapiens	Leukemic white blood cells and various RNA preparation protocols	individual	patient 26	patient 9
GDS2819_individual_8_18_mod.txt	GEO	GDS2819	-3.44951994637	Homo sapiens	Leukemic white blood cells and various RNA preparation protocols	individual	patient 16	patient 25
GDS2934_protocol_1_2_mod.txt	GEO	GDS2934	-1.01224951575	Mus musculus	PPARalpha deficient small intestine response to fasting	protocol	control	fast
E-GEOD-30220_36_2_4_mod.txt	ArrayExpress	E-GEOD-30220	-3.8323476715	Homo sapiens	Global gene-expression profiles analysis of iPSCs	FactorValue..DERIVATION.	beta-thalassemia patient	beta-thalassemia patient iPS cells
E-GEOD-8961_30_3_5_mod.txt	ArrayExpress	E-GEOD-8961	1.30961919717	Homo sapiens	Transcription profiling by array of human bronchiole epithelial cells infected with human metapneumovirus	Factor.Value.time.	24	72
GDS3142_tissue_8_11_mod.txt	GEO	GDS3142	-4.63737382129	Mus musculus	Various tissues	tissue	fetus	liver
GDS3113_tissue_20_31_mod.txt	GEO	GDS3113	2.2923353203	Homo sapiens	Various normal tissues	tissue	salivary gland	Universal Human Reference RNA
E-GEOD-20033_24_1_2_mod.txt	ArrayExpress	E-GEOD-20033	-3.01060901125	Homo sapiens	Minicircle-derived iPS cells - Affymetrix Data	Factor.Value..DEVELOPMENTAL.STAGE.	adult	undifferentiated
GDS3113_tissue_7_8_mod.txt	GEO	GDS3113	1.13091590688	Homo sapiens	Various normal tissues	tissue	fetal liver	fetal thymus
GDS589_tissue_5_12_mod.txt	GEO	GDS589	1.87517438944	Rattus norvegicus	Multiple normal tissue gene expression across strains	tissue	cerebral cortex	heart
GDS1290_time_2_3_mod.txt	GEO	GDS1290	-1.31245327407	Homo sapiens	CD4+ lymphocyte polarization into Th1 and Th2 cells in the presence of TGFbeta: time course (HG-U95A)	time	2 h	48 h
E-TABM-672_24_1_7_mod.txt	ArrayExpress	E-TABM-672	4.93238994202	Mus musculus	Transcription profiling of mouse embyronic stem cell line CGR8 during the first 10 days of differentiation into embryoid bodies	Factor.Value..Age.	0	6
E-GEOD-7869_28_1_2_mod.txt	ArrayExpress	E-GEOD-7869	-2.32607522684	Homo sapiens	Transcription profiling by array of human renal cysts from patients with autosomal dominant polycystic kidney disease	Factor.Value.disease.state.	autosomal dominant polycystic kidney disease	renal cell carcinoma
E-GEOD-14897_25_1_4_mod.txt	ArrayExpress	E-GEOD-14897	-2.10807254272	Homo sapiens	Transcription profiling by array of human hepatic cells derived from foreskin fibroblast cells or embryonic stem cells	FactorValue.cell.type.	fibroblast	stem cell
E-GEOD-36643_30_1_2_mod.txt	ArrayExpress	E-GEOD-36643	2.18801159479	Homo sapiens	Ganglioside GD2 identifies Breast Cancer Stem Cells: Targeting GD3 Synthase Inhibits GD2 Expression and Tumor Growth	FactorValue..FACS.SORTED.CELL.POPULATION.	CD24_high	CD44_high
GDS3442_age_2_3_mod.txt	GEO	GDS3442	-1.07961242705	Mus musculus	Embryonic brain development	age	E13.5	E9.5
GDS1607_tissue_2_3_mod.txt	GEO	GDS1607	4.15992359794	Mus musculus	Muscle glycogen content effect on skeletal muscle	tissue	liver	medial gastrocnemius
E-GEOD-24207_47_9_11_mod.txt	ArrayExpress	E-GEOD-24207	3.9590160543	Mus musculus	mRNA analysis in different mouse tissues	FactorValue..TISSUE.	kidney	lung
GDS3142_tissue_11_17_mod.txt	GEO	GDS3142	1.75222319268	Mus musculus	Various tissues	tissue	liver	salivary gland
E-GEOD-16238_33_1_2_mod.txt	ArrayExpress	E-GEOD-16238	1.52698491338	Homo sapiens	Genome-wide identification of binding sites of Evi1 in human myeloid cell lines	Factor.Value..AGE.	35 years	65 years
E-GEOD-7540_25_5_7_mod.txt	ArrayExpress	E-GEOD-7540	1.83290227442	Homo sapiens	Transcription profiling of brain samples from human and chimpanzee subjects	Factor.Value..OrganismPart.	cerebellum	hippocampus
E-MEXP-3444_36_4_5_mod.txt	ArrayExpress	E-MEXP-3444	-1.06884455712	Mus musculus	Transcriptional profiling by array of mouse cerebellar cortex during postnatal development	Factor.Value.AGE.	7	10
E-GEOD-9894_31_1_4_mod.txt	ArrayExpress	E-GEOD-9894	4.92515921268	Homo sapiens	Transcription profiling of human culture-amplified and native bone marrow mesenchymal stem cells to characterize specific plasma membrane protein phenotype	Factor.Value.cell.type.	erythropoietic	mesenchymal stem cell
GDS181_tissue_13_34_mod.txt	GEO	GDS181	4.71808508574	Homo sapiens	Large-scale analysis of the human transcriptome (HG-U95A)	tissue	HL60	THY+
E-GEOD-18552_58_1_2_mod.txt	ArrayExpress	E-GEOD-18552	-6.99955303776	Homo sapiens	CDK inhibitors and flavopiridol profiling on A2780 and MCF7 cells	FactorValue..CELL.LINE.	A2780	MCF7
GDS2428_specimen_1_2_mod.txt	GEO	GDS2428	-1.03820257832	Homo sapiens	DNA demethylation effect on glioblastoma cultures	specimen	GLI56	GLI60
E-GEOD-22381_38_2_3_mod.txt	ArrayExpress	E-GEOD-22381	1.03424559614	Mus musculus	Identification of downstream transcriptional targets of Dlx5 during early mouse inner ear (otocyst/otic vesicle) development	FactorValue..AGE.	E10	E10.5
E-GEOD-24207_47_4_23_mod.txt	ArrayExpress	E-GEOD-24207	2.34524431235	Mus musculus	mRNA analysis in different mouse tissues	FactorValue..TISSUE.	brain	thymus
GDS3491_genotype_variation_2_4_mod.txt	GEO	GDS3491	3.17847707641	Mus musculus	Aire ectopic expression effect on pancreatic islet beta cells	genotype_variation	non-transgenic control	wild type
GDS3113_tissue_16_22_mod.txt	GEO	GDS3113	1.40323933329	Homo sapiens	Various normal tissues	tissue	peripheral blood lymphocyte	skin
GDS3113_tissue_20_24_mod.txt	GEO	GDS3113	2.25681022526	Homo sapiens	Various normal tissues	tissue	salivary gland	spinal cord
E-GEOD-28417_36_1_2_mod.txt	ArrayExpress	E-GEOD-28417	-3.40734524908	Mus musculus	Expression data from mouse tissues	FactorValue..ORGANISM.PART.	heart	liver
E-GEOD-29848_38_5_6_mod.txt	ArrayExpress	E-GEOD-29848	1.0663749119	Mus musculus	Microarray data of differentiating embryonic stem cells overexpressing the transcription factor Msgn1	FactorValue..TREATMENT.	Day2 EBs induced with doxycycline and cultured for another 24h	Day2 EBs induced with doxycycline and cultured for another 48h
E-GEOD-30056_37_1_3_mod.txt	ArrayExpress	E-GEOD-30056	-1.86138445383	Mus musculus	Reconstitution of the mouse germ-cell specification pathway in culture by pluripotent stem cells	FactorValue..CELL.TYPE.	embryonic stem cells (ESCs)	epiblast like cells (EpiLCs)
E-TABM-34_29_1_2_mod.txt	ArrayExpress	E-TABM-34	1.93883640964	Homo sapiens	Transcription profiling of dendritic cell subsets in human tonsils and blood	Factor.Value..OrganismPart.	blood	tonsil
GDS3113_tissue_5_14_mod.txt	GEO	GDS3113	2.41286568648	Homo sapiens	Various normal tissues	tissue	fetal brain	ovary
GDS3113_tissue_8_28_mod.txt	GEO	GDS3113	1.54979870309	Homo sapiens	Various normal tissues	tissue	fetal thymus	thyroid
GDS3142_tissue_1_20_mod.txt	GEO	GDS3142	-1.9269516016	Mus musculus	Various tissues	tissue	adipose tissue	spleen
E-GEOD-13409_35_1_3_mod.txt	ArrayExpress	E-GEOD-13409	-1.71278222314	Mus musculus	Expression data of Na??ve Treg and Tumor associated Treg cells	FactorValue..GENOTYPE.	Foxp3-GFP KI, Ascites Treg cells were tumor-associated FoxP3-GFP+ cells sorted from the tumor ascites of 129/SvJ mice IP-injected with 1 x 106 RMAS cells 5 days earlier;	not specified
E-GEOD-29437_47_2_3_mod.txt	ArrayExpress	E-GEOD-29437	3.30911019377	Homo sapiens	Progesterone inhibits epithelial-to-mesenchymal transition in endometrial cancer	FactorValue..TREAMENT.	none	not specified
GDS1381_individual_3_6_mod.txt	GEO	GDS1381	-7.02092742682	Homo sapiens	Carboplatin sensitive and resistant ovarian carcinoma	individual	patient 3	patient 6
E-GEOD-18269_53_1_3_mod.txt	ArrayExpress	E-GEOD-18269	4.47945692765	Homo sapiens	HepaRG cells as a model of the primary human hepatocyte transcriptome	FactorValue..CELL.LINE.	HepaRG	not specified
GDS509_time_2_6_mod.txt	GEO	GDS509	-1.70577376185	Rattus norvegicus	Fracture healing timecourse and the effect of age	time	2 week post_fracture	pre-fracture
GDS3142_tissue_13_19_mod.txt	GEO	GDS3142	-1.18762824322	Mus musculus	Various tissues	tissue	muscle	small intestine
GDS3113_tissue_21_22_mod.txt	GEO	GDS3113	2.79003608346	Homo sapiens	Various normal tissues	tissue	skeletal muscle	skin
GDS1956_disease.state_4_10_mod.txt	GEO	GDS1956	-1.01975824298	Homo sapiens	Various muscle diseases (HG-U133A)	disease.state	Calpain 3 mutation	juvenile dermatomyositis
GDS3142_tissue_19_20_mod.txt	GEO	GDS3142	1.837338919	Mus musculus	Various tissues	tissue	small intestine	spleen
GDS3499_agent_2_6_mod.txt	GEO	GDS3499	-1.57202427194	Homo sapiens	TREM-1 activation effect on monocytes in vitro	agent	anti-Trem-1 Ab and LPS	vehicle
GDS3142_tissue_7_11_mod.txt	GEO	GDS3142	-4.17436362897	Mus musculus	Various tissues	tissue	eye	liver
GDS3113_tissue_8_14_mod.txt	GEO	GDS3113	2.13896948563	Homo sapiens	Various normal tissues	tissue	fetal thymus	ovary
E-GEOD-14098_38_1_3_mod.txt	ArrayExpress	E-GEOD-14098	2.62804780437	Homo sapiens	Gene expression profiles obtained from laser-microdissected human choroid plexus papilloma cells	FactorValue..SEX.	female	not specified
E-GEOD-31545_41_1_2_mod.txt	ArrayExpress	E-GEOD-31545	2.45384890018	Homo sapiens	Stem-like glioma-propagating cells contribute to molecular heterogeneity and survival outcome in oligodendroglial tumors	FactorValue..HISTOLOGY.	anaplastic oligoastrocytoma	glioblastoma multiforme
E-GEOD-24207_47_5_22_mod.txt	ArrayExpress	E-GEOD-24207	-1.2070030798	Mus musculus	mRNA analysis in different mouse tissues	FactorValue..TISSUE.	diaphragm	testis
GDS3113_tissue_2_11_mod.txt	GEO	GDS3113	-2.85669264583	Homo sapiens	Various normal tissues	tissue	bone marrow	liver
E-GEOD-15904_24_1_2_mod.txt	ArrayExpress	E-GEOD-15904	3.4212758213	Mus musculus	Transcription profiling by array of mouse mammary tumors	Factor.Value..HISTOLOGICAL.SUBTYPE.	Adenocarcinoma	EMT
E-GEOD-18269_53_1_2_mod.txt	ArrayExpress	E-GEOD-18269	5.77533317031	Homo sapiens	HepaRG cells as a model of the primary human hepatocyte transcriptome	FactorValue..CELL.LINE.	HepaRG	HepG2
E-GEOD-23938_38_2_4_mod.txt	ArrayExpress	E-GEOD-23938	-1.52104715247	Mus musculus	Comprehensive genomic profiling identified miRNA signatures associated with mammary tumor differentiation and development	FactorValue..GENETICALLY.ENGINEERED.MOUSE.MODEL.	C3TAg	MMTV-H2N
GDS1490_tissue_12_29_mod.txt	GEO	GDS1490	-1.24948134297	Mus musculus	Neural tissue profiling	tissue	hippocampus CA1	spleen
E-GEOD-29949_55_2_3_mod.txt	ArrayExpress	E-GEOD-29949	4.49716493457	Mus musculus	Gene expression comparison among spleen dendritic cells	FactorValue..CELL.TYPE.	microglia	monocyte
E-MEXP-1504_36_1_4_mod.txt	ArrayExpress	E-MEXP-1504	2.4312811587	Mus musculus	Transcription profiling of liver	Factor.Value..organism.part.	kidney	spleen
GDS3113_tissue_21_24_mod.txt	GEO	GDS3113	2.37476012118	Homo sapiens	Various normal tissues	tissue	skeletal muscle	spinal cord
GDS2958_cell.type_2_3_mod.txt	GEO	GDS2958	6.03663007832	Homo sapiens	Tumor suppressor PTEN depletion effect on various cell lines	cell.type	mammary adenocarcinoma	non-small cell lung carcinoma
E-GEOD-23782_42_1_2_mod.txt	ArrayExpress	E-GEOD-23782	-1.20796649294	Mus musculus	Adult epidermal Notch activity induces dermal accumulation of stromal cells	FactorValue..TISSUE.	dermis	epidermis
E-GEOD-32966_37_2_5_mod.txt	ArrayExpress	E-GEOD-32966	-1.28462081641	Mus musculus	Dermal reprogramming through epidermal activation of beta-catenin	FactorValue..SORTED.CELL.POPULATION.	GFP+ sustained activated D2 dermal fibroblasts	ItgA6+ neonatal epidermal keratinocytes
GDS3142_tissue_19_22_mod.txt	GEO	GDS3142	1.33560672087	Mus musculus	Various tissues	tissue	small intestine	thymus
E-GEOD-22506_20_1_2_mod.txt	ArrayExpress	E-GEOD-22506	-5.61173341509	Mus musculus	Unacylated Ghrelin Rapidly Modulates Lipogenic and Insulin Signaling Pathway Gene Expression in Metabolically Active Tissues of GHSR Deleted Mice	Factor.Value..TISSUE.	Gonadal white adipose tissue	Liver
GDS3113_tissue_21_27_mod.txt	GEO	GDS3113	1.37541616202	Homo sapiens	Various normal tissues	tissue	skeletal muscle	thymus
E-TABM-1091_29_1_5_mod.txt	ArrayExpress	E-TABM-1091	1.10868176681	Homo sapiens	Transcriptiion profiling by array of human ratiometric mixes of high quality RNA from different tissues using different labeling protocols to provide a mechanism for assessing process improvement	Factor.Value..MIX.	Human Brain Reference RNA	skeletal muscle only
GDS2819_individual_11_19_mod.txt	GEO	GDS2819	2.14108754115	Homo sapiens	Leukemic white blood cells and various RNA preparation protocols	individual	patient 19	patient 26
GDS509_time_3_6_mod.txt	GEO	GDS509	-1.95905798056	Rattus norvegicus	Fracture healing timecourse and the effect of age	time	3 days post_fracture	pre-fracture
GDS3142_tissue_7_22_mod.txt	GEO	GDS3142	-1.16329635069	Mus musculus	Various tissues	tissue	eye	thymus
E-GEOD-27987_35_2_4_mod.txt	ArrayExpress	E-GEOD-27987	2.0033170465	Mus musculus	Differential pre-mRNA processing in Crebbp+/- mice	FactorValue..CELL.TYPE.	Cdkn1a+/+ FLHSC	Crebbp+/- MEF
E-GEOD-24207_47_8_12_mod.txt	ArrayExpress	E-GEOD-24207	7.48701736481	Mus musculus	mRNA analysis in different mouse tissues	FactorValue..TISSUE.	insulinoma	muscle
E-GEOD-24207_47_6_22_mod.txt	ArrayExpress	E-GEOD-24207	-2.10031648822	Mus musculus	mRNA analysis in different mouse tissues	FactorValue..TISSUE.	eye	testis
GDS3113_tissue_11_19_mod.txt	GEO	GDS3113	3.9791588947	Homo sapiens	Various normal tissues	tissue	liver	retina
E-TABM-672_24_3_8_mod.txt	ArrayExpress	E-TABM-672	4.26766138952	Mus musculus	Transcription profiling of mouse embyronic stem cell line CGR8 during the first 10 days of differentiation into embryoid bodies	Factor.Value..Age.	2	7
E-GEOD-34078_40_1_2_mod.txt	ArrayExpress	E-GEOD-34078	1.57676413578	Mus musculus	Global gene expression profiling in mouse plasma cell tumor precursor and bystander cells revels potential intervention targets for plasma-cell neoplasia	FactorValue..TISSUE.TYPE.	Laser-captured nascent plasma cell tumor cells from ip oil granulomata	Whole tissue sections of ip oil granulomata
E-GEOD-24207_47_7_9_mod.txt	ArrayExpress	E-GEOD-24207	-2.63847606591	Mus musculus	mRNA analysis in different mouse tissues	FactorValue..TISSUE.	heart	kidney
E-GEOD-28598_46_2_3_mod.txt	ArrayExpress	E-GEOD-28598	-2.58502711649	Mus musculus	Protection from obesity and diabetes by blockade of TGF-beta/Smad3 signaling	FactorValue..STRAIN.	C57J/B6	mixed strains of C57BL/6 and NIH Black Swiss females (Taconic)
E-GEOD-24207_47_16_18_mod.txt	ArrayExpress	E-GEOD-24207	1.53701504839	Mus musculus	mRNA analysis in different mouse tissues	FactorValue..TISSUE.	pituitary gland	salivary gland
GDS2671_time_3_6_mod.txt	GEO	GDS2671	-4.20992030124	Mus musculus	Embryonic V6.5 stem cell differentiation in vitro (MG-430A)	time	14 d	36 h
E-GEOD-30220_36_2_3_mod.txt	ArrayExpress	E-GEOD-30220	-3.75651035634	Homo sapiens	Global gene-expression profiles analysis of iPSCs	FactorValue..DERIVATION.	beta-thalassemia patient	beta-thalassemia patient fibroblast cells
GDS574_strain_1_2_mod.txt	GEO	GDS574	-1.067038601	Rattus norvegicus	Renal function and dietary salt	strain	Dahl SS/Jr	Sprague Dawley
GDS563_disease.state_1_2_mod.txt	GEO	GDS563	-1.1747981399	Homo sapiens	Duchenne muscular dystrophy (II) (HG-U95A)	disease.state	Duchenne muscular dystrophy	normal
GDS2209_tissue_1_2_mod.txt	GEO	GDS2209	-2.88448458837	Mus musculus	Spinal cord and dorsal root ganglion	tissue	dorsal root ganglion	spinal cord
GDS2947_disease.state_1_2_mod.txt	GEO	GDS2947	1.29383938271	Homo sapiens	Colorectal adenoma formation	disease.state	adenoma	normal mucosa
E-GEOD-18649_36_3_4_mod.txt	ArrayExpress	E-GEOD-18649	2.7474403819	Mus musculus	Molecular Profiling of the Developing Axial Skeleton: A role for Tgfbr2 in the Development of the Intervertebral Disc.	FactorValue..GENOTYPE.	Cre+;Tgrbr2lox.lox	not specified
E-GEOD-34907_29_3_4_mod.txt	ArrayExpress	E-GEOD-34907	-1.43696628874	Mus musculus	Genetic and epigenetic determinants of neurogenesis and myogenesis [expression profiling]	FactorValue..CELL.TYPE.	undifferentiated MEF cells	undifferentiated P19 cells
GDS3113_tissue_3_19_mod.txt	GEO	GDS3113	2.0079578366	Homo sapiens	Various normal tissues	tissue	brain	retina
GDS3113_tissue_11_28_mod.txt	GEO	GDS3113	3.17326437095	Homo sapiens	Various normal tissues	tissue	liver	thyroid
GDS3142_tissue_11_22_mod.txt	GEO	GDS3142	3.24283404555	Mus musculus	Various tissues	tissue	liver	thymus
E-MEXP-70_30_1_2_mod.txt	ArrayExpress	E-MEXP-70	1.94521747942	Homo sapiens	Transcription profiling by array of human primary CD30+/CD38lo cells differentiating along the megakaryocyte lineage	FactorValue.TARGETED.CELL.TYPE.	Megakaryocyte	primary CD34+/CD38lo cells
GDS2819_individual_6_19_mod.txt	GEO	GDS2819	2.875569668	Homo sapiens	Leukemic white blood cells and various RNA preparation protocols	individual	patient 14	patient 26
E-MEXP-2146_29_2_5_mod.txt	ArrayExpress	E-MEXP-2146	2.01995786204	Homo sapiens	Transcription profiling of human hematopoietic stem cells in a unilineage culture system	Factor.Value..GROWTH_CONDITION.	erythroid unilineage culture	monocytic unilineage culture
E-GEOD-29618_37_1_2_mod.txt	ArrayExpress	E-GEOD-29618	2.14469818571	Homo sapiens	FACS-sorted cells from Young Adults Vaccinated with Influenza TIV or LAIV Vaccines during 2008/09 Flu Season	FactorValue..CELL.TYPE.	Bcells	mDC
E-GEOD-20033_27_1_5_mod.txt	ArrayExpress	E-GEOD-20033	-1.77976596569	Homo sapiens	Minicircle-derived iPS cells - Affymetrix Data	Factor.Value..CELL.TYPE.	adipose stem cells derived from adult human donor	iPSC derived from hASC using minicircle reprogramming vector
GDS3142_tissue_1_6_mod.txt	GEO	GDS3142	-2.53994244602	Mus musculus	Various tissues	tissue	adipose tissue	embryonic stem cells
GDS3113_tissue_18_19_mod.txt	GEO	GDS3113	2.27167107826	Homo sapiens	Various normal tissues	tissue	prostate	retina
E-GEOD-24207_47_5_8_mod.txt	ArrayExpress	E-GEOD-24207	-7.45523727453	Mus musculus	mRNA analysis in different mouse tissues	FactorValue..TISSUE.	diaphragm	insulinoma
E-GEOD-26408_33_3_5_mod.txt	ArrayExpress	E-GEOD-26408	-4.90464163207	Mus musculus	Signatures of murine B-cell development implicate Yy1 as a regulator of the germinal center-specific program	FactorValue..CELL.TYPE.	Purified Germinal Centre (B220-positive/PNA-high) B-cells	Purified Plasma cells (B220-low/Cd138-positive/Cd93-negative)
GDS3113_tissue_14_15_mod.txt	GEO	GDS3113	-3.5325010146	Homo sapiens	Various normal tissues	tissue	ovary	pancreas
E-GEOD-20244_37_4_6_mod.txt	ArrayExpress	E-GEOD-20244	1.03071926781	Mus musculus	A comprehensive methylome map of lineage commitment from hematopoietic progenitors	FactorValue..PROGENITOR.POPULATION.	DN2	GMP
E-GEOD-14990_25_1_2_mod.txt	ArrayExpress	E-GEOD-14990	4.70088543709	Homo sapiens	MYC regulation of a poor prognosis metastatic cancer cell state	Factor.Value..CELL.TYPE.	cancer cell culture	immortalized cell culture
E-GEOD-25098_32_2_7_mod.txt	ArrayExpress	E-GEOD-25098	-2.39827869947	Mus musculus	Rhabdomyosarcoma can be initiated in activated Pax7+ Muscle Progenitor Cells	FactorValue..GENOTYPE.VARIATION.	Pax7-CreER/+; LSL-KrasG12D;Trp53Flox/+	Wild Type mice
E-GEOD-30138_43_3_5_mod.txt	ArrayExpress	E-GEOD-30138	-1.45207684172	Mus musculus	Global Gene Expression Analysis of Murine Limb Development	FactorValue..DEVELOPMENTAL.STAGE.	E12.5	E9.5
E-GEOD-22787_37_1_4_mod.txt	ArrayExpress	E-GEOD-22787	-7.31283559714	Homo sapiens	Affymetrix HG-U133A 2.0 Expression data	FactorValue..GENOTYPE.VARIATION.	BRAF V600E mutation	wild type BRAF, NRAS, and CDKN2A
E-GEOD-18534_29_1_2_mod.txt	ArrayExpress	E-GEOD-18534	-1.80687249916	Mus musculus	Transcription profiling by array of a mouse small cell lung cancer model	Factor.Value..ORGANISM_PART.	lung	lung tumor
E-GEOD-24207_47_9_21_mod.txt	ArrayExpress	E-GEOD-24207	3.17782438696	Mus musculus	mRNA analysis in different mouse tissues	FactorValue..TISSUE.	kidney	spleen
GDS3113_tissue_23_31_mod.txt	GEO	GDS3113	1.30033110149	Homo sapiens	Various normal tissues	tissue	small intestine	Universal Human Reference RNA
E-GEOD-32423_38_2_6_mod.txt	ArrayExpress	E-GEOD-32423	3.43783825465	Mus musculus	Expression data from naive and memory CD8 T cells cultured in presence or absence of IL-4	FactorValue..TREATMENT.	incubated with IL4 and IL7, for 20h in vitro	not specified
E-GEOD-32966_37_3_8_mod.txt	ArrayExpress	E-GEOD-32966	-2.30368720525	Mus musculus	Dermal reprogramming through epidermal activation of beta-catenin	FactorValue..SORTED.CELL.POPULATION.	GFP+ telogen dermal fibroblasts	ItgA6+ transient activated D2 epidermal keratinocytes
GDS3113_tissue_10_13_mod.txt	GEO	GDS3113	1.23316816996	Homo sapiens	Various normal tissues	tissue	kidney	mammary gland
GDS589_tissue_5_16_mod.txt	GEO	GDS589	1.68092911847	Rattus norvegicus	Multiple normal tissue gene expression across strains	tissue	cerebral cortex	large intestine
GDS794_time_2_3_mod.txt	GEO	GDS794	-1.07962266081	Mus musculus	Cardiac hypertrophy progression: time course	time	21 d	2 d
E-GEOD-24207_47_14_18_mod.txt	ArrayExpress	E-GEOD-24207	3.06243432432	Mus musculus	mRNA analysis in different mouse tissues	FactorValue..TISSUE.	pancreatic acini	salivary gland
E-GEOD-18567_24_3_4_mod.txt	ArrayExpress	E-GEOD-18567	1.01224582739	Mus musculus	Temporal profiling of gene expression in cochleae of wild type and alpha9 null mice	Factor.Value..AGE.	P60	P7
E-GEOD-27932_35_2_3_mod.txt	ArrayExpress	E-GEOD-27932	-2.683905999	Mus musculus	FoxOs are lineage-restricted redundant tumor suppressors and regulate endothelial cell homeostasis.	FactorValue..CELL.TYPE.	Lung endothelial cells	not specified
E-GEOD-24207_47_7_10_mod.txt	ArrayExpress	E-GEOD-24207	-3.61971842377	Mus musculus	mRNA analysis in different mouse tissues	FactorValue..TISSUE.	heart	liver
GDS1522_tissue_3_4_mod.txt	GEO	GDS1522	-4.01217996346	Mus musculus	Forebrain neuronal subtypes	tissue	cingulate cortex homogenate	hippocampus
E-GEOD-27987_35_3_6_mod.txt	ArrayExpress	E-GEOD-27987	2.38299822593	Mus musculus	Differential pre-mRNA processing in Crebbp+/- mice	FactorValue..CELL.TYPE.	Crebbp+/- FLHSC	Crebbp+/+ MEF
E-GEOD-13093_28_2_4_mod.txt	ArrayExpress	E-GEOD-13093	-2.02061460205	Mus musculus	Feeding schedule and the circadian clock shape rhythms in hepatic gene expression	FactorValue..STRAIN.OR.LINE.	C57/B6, Gender: male, Age: 8-12 weeks, Condition: Fasted	Cry1,Cry2 double KO mice, Gender: female, Age: 8-16 weeks, Condition: ad libitum food availability
GDS3142_tissue_9_19_mod.txt	GEO	GDS3142	-1.60053898452	Mus musculus	Various tissues	tissue	heart	small intestine
GDS968_individual_32_40_mod.txt	GEO	GDS968	-2.33991906115	Homo sapiens	Radiation therapy toxicity association with abnormal transcriptional response to DNA damage	individual	RadC9	RadS7
GDS1490_tissue_3_29_mod.txt	GEO	GDS1490	-1.06677809946	Mus musculus	Neural tissue profiling	tissue	bed nucleus stria terminalis	spleen
GDS3113_tissue_3_14_mod.txt	GEO	GDS3113	1.79123409539	Homo sapiens	Various normal tissues	tissue	brain	ovary
E-MEXP-3133_24_1_3_mod.txt	ArrayExpress	E-MEXP-3133	3.01881975859	Mus musculus	Gene expression profiling at early organogenesis in lung and thyroid	Factor.Value.ORGANISM_PART.	lung	whole_organism
E-GEOD-11238_25_1_3_mod.txt	ArrayExpress	E-GEOD-11238	-2.04977079046	Homo sapiens	Transcription profiling by array of HeLa cells infected with vaccinia virus mutant for E3L	Factor.Value.time.	2	9
E-MEXP-2700_27_2_5_mod.txt	ArrayExpress	E-MEXP-2700	-1.55925929957	Homo sapiens	Investigating gradients of gene expression involved in early human cortical development	Factor.Value.AGE.	9	11
E-GEOD-24207_47_1_3_mod.txt	ArrayExpress	E-GEOD-24207	-1.82841121597	Mus musculus	mRNA analysis in different mouse tissues	FactorValue..TISSUE.	adipose tissue	bone marrow
GDS3113_tissue_15_32_mod.txt	GEO	GDS3113	3.06091290843	Homo sapiens	Various normal tissues	tissue	pancreas	uterus
E-TABM-672_24_2_6_mod.txt	ArrayExpress	E-TABM-672	3.64390375191	Mus musculus	Transcription profiling of mouse embyronic stem cell line CGR8 during the first 10 days of differentiation into embryoid bodies	Factor.Value..Age.	1	5
GDS3142_tissue_4_17_mod.txt	GEO	GDS3142	1.13890701828	Mus musculus	Various tissues	tissue	brain	salivary gland
GDS1479_specimen_3_5_mod.txt	GEO	GDS1479	-2.09218508502	Homo sapiens	Carcinoma in situ lesions of the urinary bladder	specimen	normal mucosa	superficial transitional cell carcinoma w/o surrounding carcinoma in situ (CIS) lesion
E-MEXP-1649_37_4_6_mod.txt	ArrayExpress	E-MEXP-1649	2.38185116292	Mus musculus	Transcription profiling of mouse liver cells with liver specific deletion of Irs1 and/or Irs2 and Foxo1during fasting and feeding	Factor.Value..GENOTYPE.	Irs2 L/L	Liver Specific Irs1 -/-::Irs2 -/-
GDS3142_tissue_4_8_mod.txt	GEO	GDS3142	4.00370057193	Mus musculus	Various tissues	tissue	brain	fetus
E-GEOD-28799_39_1_2_mod.txt	ArrayExpress	E-GEOD-28799	-4.65723731454	Homo sapiens	Isolation and characterization of stem-like cells from a human ovarian cancer cell line	FactorValue..CELL.LINE.	OVCAR-3_derived stem cell-like cells	OVCAR-3 parental (progenitor)
E-GEOD-24207_47_7_22_mod.txt	ArrayExpress	E-GEOD-24207	-1.22327170447	Mus musculus	mRNA analysis in different mouse tissues	FactorValue..TISSUE.	heart	testis
E-MEXP-3111_34_1_2_mod.txt	ArrayExpress	E-MEXP-3111	-5.49437030175	Homo sapiens	Interactome of Human Embryo Implantation: Identification of Gene Expression Pathways, Regulation, and Integrated Regulatory Networks.	Factor.Value.DevelopmentalStage.	adult	embryo
E-MEXP-1976_23_1_2_mod.txt	ArrayExpress	E-MEXP-1976	1.3095972278	Mus musculus	Transcription profiling of Mixl1 heterozygous or null mouse embryonic stem cells to identify downstream transcriptional targets during early development	Factor.Value..TIME.	2	2.8
GDS2819_disease.state_4_5_mod.txt	GEO	GDS2819	1.85733757386	Homo sapiens	Leukemic white blood cells and various RNA preparation protocols	disease.state	AML with normal karyotype and other abnormalities	AML with t 11q23, MLL
E-GEOD-26355_42_1_2_mod.txt	ArrayExpress	E-GEOD-26355	2.06204332519	Mus musculus	Expression data from early and late born Atoh1 lineages within the E14.5 rhombomere 1 and isthmus	FactorValue..TIME.OF.ATOH1.EXPRESSION.	E10.5	E13.5
GDS3113_tissue_3_28_mod.txt	GEO	GDS3113	1.20206331285	Homo sapiens	Various normal tissues	tissue	brain	thyroid
E-GEOD-24207_47_12_22_mod.txt	ArrayExpress	E-GEOD-24207	-1.23194517864	Mus musculus	mRNA analysis in different mouse tissues	FactorValue..TISSUE.	muscle	testis
E-GEOD-24207_47_10_18_mod.txt	ArrayExpress	E-GEOD-24207	2.01655841123	Mus musculus	mRNA analysis in different mouse tissues	FactorValue..TISSUE.	liver	salivary gland
GDS3113_tissue_2_18_mod.txt	GEO	GDS3113	-1.1492048294	Homo sapiens	Various normal tissues	tissue	bone marrow	prostate
E-GEOD-24207_47_17_22_mod.txt	ArrayExpress	E-GEOD-24207	-1.28768591789	Mus musculus	mRNA analysis in different mouse tissues	FactorValue..TISSUE.	placenta	testis
GDS3142_tissue_3_10_mod.txt	GEO	GDS3142	-2.92011898893	Mus musculus	Various tissues	tissue	bone marrow	kidney
E-GEOD-25098_33_1_3_mod.txt	ArrayExpress	E-GEOD-25098	-2.27078358311	Mus musculus	Rhabdomyosarcoma can be initiated in activated Pax7+ Muscle Progenitor Cells	FactorValue..TISSUE.	Bulk Tumor	Normal Muscle
GDS2819_individual_2_6_mod.txt	GEO	GDS2819	-3.27387291628	Homo sapiens	Leukemic white blood cells and various RNA preparation protocols	individual	patient 10	patient 14
E-GEOD-24207_47_9_10_mod.txt	ArrayExpress	E-GEOD-24207	-1.05341869744	Mus musculus	mRNA analysis in different mouse tissues	FactorValue..TISSUE.	kidney	liver
E-GEOD-18649_36_1_4_mod.txt	ArrayExpress	E-GEOD-18649	2.89665750677	Mus musculus	Molecular Profiling of the Developing Axial Skeleton: A role for Tgfbr2 in the Development of the Intervertebral Disc.	FactorValue..GENOTYPE.	Cre-;Tgfbr2lox/wt	not specified
GDS3113_tissue_21_23_mod.txt	GEO	GDS3113	1.10995411474	Homo sapiens	Various normal tissues	tissue	skeletal muscle	small intestine
GDS2158_time_1_2_mod.txt	GEO	GDS2158	1.26357966059	Mus musculus	Emery-Dreifuss muscular dystrophy model: regenerating skeletal muscle	time	0 d	3 d
E-GEOD-30056_37_1_4_mod.txt	ArrayExpress	E-GEOD-30056	1.82677807518	Mus musculus	Reconstitution of the mouse germ-cell specification pathway in culture by pluripotent stem cells	FactorValue..CELL.TYPE.	embryonic stem cells (ESCs)	epiblast stem cells (EpiSCs)
GDS3113_tissue_28_29_mod.txt	GEO	GDS3113	-1.14744987475	Homo sapiens	Various normal tissues	tissue	thyroid	tonsil
GDS3142_tissue_3_4_mod.txt	GEO	GDS3142	-3.05195935004	Mus musculus	Various tissues	tissue	bone marrow	brain
GDS3113_tissue_23_28_mod.txt	GEO	GDS3113	1.46472743577	Homo sapiens	Various normal tissues	tissue	small intestine	thyroid
GDS2159_time_1_6_mod.txt	GEO	GDS2159	1.83924888361	Mus musculus	Spinal cord injury model: time course	time	0.5 h	72 h
E-GEOD-25140_35_1_4_mod.txt	ArrayExpress	E-GEOD-25140	-1.11282330015	Mus musculus	Prostate specific Pten deletion	FactorValue..GENOTYPE.	Prostate-specific Pten and p53 deletion	wild-type
E-GEOD-35366_37_1_2_mod.txt	ArrayExpress	E-GEOD-35366	-1.30159958786	Mus musculus	Global developmental gene expression and pathway analysis of normal brain development and mouse models of human neuronal migration defects	FactorValue..AGE.	E14	P0
E-MEXP-2360_27_1_5_mod.txt	ArrayExpress	E-MEXP-2360	-1.54744425762	Homo sapiens	Transcription profiling of human memory B cells to plasma cells differentiation time course	Factor.Value.CELL_TYPE.	activated B cells	plasma cells
E-GEOD-23583_50_1_4_mod.txt	ArrayExpress	E-GEOD-23583	-1.81210572695	Homo sapiens	Highly efficient reprogramming to pluripotency and directed differentiation using synthetic mRNA	FactorValue..CELL.TYPE.	BJ fibroblast	iPS cells derived from CF fibroblast
E-GEOD-24207_47_1_20_mod.txt	ArrayExpress	E-GEOD-24207	-3.75794733847	Mus musculus	mRNA analysis in different mouse tissues	FactorValue..TISSUE.	adipose tissue	small intestine
E-GEOD-21247_49_1_2_mod.txt	ArrayExpress	E-GEOD-21247	1.23212758904	Mus musculus	Network Analysis of Skin Tumor Progression Identifies a Rewired Genetic Architecture Affecting Inflammation and Tumor Susceptibility (carcinomas)	FactorValue..DX.	SCC	spindle
E-GEOD-20524_30_1_2_mod.txt	ArrayExpress	E-GEOD-20524	-1.51967642133	Mus musculus	Blood Gene Expression Signatures Predict Invasive Candidiasis	Factor.Value..INFECTION.STATUS.	candida	healthy
E-GEOD-19650_38_3_4_mod.txt	ArrayExpress	E-GEOD-19650	4.35533172495	Homo sapiens	Expression data from epithelial cells during the process of multistep pancreatic carcinogenesis	FactorValue..DISEASE.STATUS.	intraductal papillary-mucinous neoplasm (IPMN)	normal
E-GEOD-22544_30_1_3_mod.txt	ArrayExpress	E-GEOD-22544	2.91470666774	Homo sapiens	Transcription profiling by array of human infiltrating ductal carcinomas of the breast	Factor.Value.disease.state.	infiltrating ductal carcinoma	normal
GDS2159_time_1_3_mod.txt	GEO	GDS2159	1.61176664146	Mus musculus	Spinal cord injury model: time course	time	0.5 h	24 h
E-TABM-672_24_2_4_mod.txt	ArrayExpress	E-TABM-672	1.34325414673	Mus musculus	Transcription profiling of mouse embyronic stem cell line CGR8 during the first 10 days of differentiation into embryoid bodies	Factor.Value..Age.	1	3
E-GEOD-11990_35_2_5_mod.txt	ArrayExpress	E-GEOD-11990	1.00807797932	Mus musculus	Gene expression profiling of mouse p53-deficient epidermal carcinoma defines molecular determinants of human cancer malignancy (training dataset)	FactorValue..HISTOLOGICAL.SUBTYPE.	not specified	undifferentiated
E-GEOD-30747_51_2_3_mod.txt	ArrayExpress	E-GEOD-30747	1.34024523264	Mus musculus	AML mouse models	FactorValue..TREATMENT.	not specified	untreated
GDS3113_tissue_14_30_mod.txt	GEO	GDS3113	-1.54143656229	Homo sapiens	Various normal tissues	tissue	ovary	trachea
GDS2819_individual_7_26_mod.txt	GEO	GDS2819	3.32411399846	Homo sapiens	Leukemic white blood cells and various RNA preparation protocols	individual	patient 15	patient 8
E-GEOD-34126_42_1_3_mod.txt	ArrayExpress	E-GEOD-34126	-2.38904914805	Mus musculus	An Animal Model of Myc-driven medulloblastoma	FactorValue..CELL.TYPE.	FACS-sorted Prominin1+, Lineage-negative (Lin) cells	Myc/DNp53-infected Prom1+Lin- cells
GDS2819_disease.state_2_5_mod.txt	GEO	GDS2819	3.13078581556	Homo sapiens	Leukemic white blood cells and various RNA preparation protocols	disease.state	ALL with t 1, 19	AML with t 11q23, MLL
GDS3113_tissue_8_19_mod.txt	GEO	GDS3113	2.35569322684	Homo sapiens	Various normal tissues	tissue	fetal thymus	retina
GDS2819_disease.state_5_7_mod.txt	GEO	GDS2819	-1.41378949685	Homo sapiens	Leukemic white blood cells and various RNA preparation protocols	disease.state	AML with t 11q23, MLL	c-ALL, Pre-B-ALL with t 9,22
E-GEOD-24207_47_8_18_mod.txt	ArrayExpress	E-GEOD-24207	6.103755753	Mus musculus	mRNA analysis in different mouse tissues	FactorValue..TISSUE.	insulinoma	salivary gland
E-GEOD-24637_42_2_3_mod.txt	ArrayExpress	E-GEOD-24637	4.01121592189	Mus musculus	Genetic and genomic analysis of hyperlipidemia	FactorValue..TISSUE.	liver	muscle
E-GEOD-13873_35_2_5_mod.txt	ArrayExpress	E-GEOD-13873	-1.91999464564	Mus musculus	Expression data from murine gastric epithelium	FactorValue..PATHOLOGY.	hyperplasia	none
GDS965_agent_1_2_mod.txt	GEO	GDS965	1.50383823937	Rattus norvegicus	Methylprednisolone effect on kidney: time course (RG-U34A)	agent	control	methylprednisolone
GDS2151_growth.protocol_1_2_mod.txt	GEO	GDS2151	1.27639138695	Mus musculus	RNA helicase p68/p72 knockdown effect on skeletal muscle cells (MG-430A)	growth.protocol	differentiation medium	growth medium
E-GEOD-24547_47_1_3_mod.txt	ArrayExpress	E-GEOD-24547	6.7765860712	Homo sapiens	Transcriptional pathway signatures for the Aurora inhibitor Danusertib	FactorValue..TISSUE.ORIGIN.	Breast	Ovary
E-GEOD-18593_29_1_2_mod.txt	ArrayExpress	E-GEOD-18593	-2.7334105331	Homo sapiens	Expression data on APM effect in vitro	FactorValue..CELL.TYPE.	Aortic Endothelial Cells	Bronchail Epithelial Cells
E-GEOD-18567_24_2_3_mod.txt	ArrayExpress	E-GEOD-18567	-1.07969641434	Mus musculus	Temporal profiling of gene expression in cochleae of wild type and alpha9 null mice	Factor.Value..AGE.	P3	P60
GDS2819_individual_8_23_mod.txt	GEO	GDS2819	-3.88198823141	Homo sapiens	Leukemic white blood cells and various RNA preparation protocols	individual	patient 16	patient 5
E-TABM-716_27_1_2_mod.txt	ArrayExpress	E-TABM-716	-1.94134376352	Mus musculus	Transcription profiling of mouse ES cell derived brachyury+ (T) cell specific transcriptome	Factor.Value..Age.	0	6
E-GEOD-24207_47_4_18_mod.txt	ArrayExpress	E-GEOD-24207	1.02037426719	Mus musculus	mRNA analysis in different mouse tissues	FactorValue..TISSUE.	brain	salivary gland
E-GEOD-27987_35_3_4_mod.txt	ArrayExpress	E-GEOD-27987	2.37474179502	Mus musculus	Differential pre-mRNA processing in Crebbp+/- mice	FactorValue..CELL.TYPE.	Crebbp+/- FLHSC	Crebbp+/- MEF
E-GEOD-29328_32_2_3_mod.txt	ArrayExpress	E-GEOD-29328	-3.38976652768	Mus musculus	Expression data from squamous cell carcinoma stem cells	FactorValue..GENOTYPE.	K14cre;TbRII(fl/fl)	K14cre;TbRII(fl/fl);FAK(fl/fl)
E-GEOD-24207_47_1_16_mod.txt	ArrayExpress	E-GEOD-24207	-5.25275631359	Mus musculus	mRNA analysis in different mouse tissues	FactorValue..TISSUE.	adipose tissue	pituitary gland
E-GEOD-27515_39_2_3_mod.txt	ArrayExpress	E-GEOD-27515	7.60337750156	Homo sapiens	Isolation and characterization of a metastatic hybrid cell line generated by ER negative and ER positive breast cancer cells in mouse bone marrow	FactorValue..GENOTYPE.	ER positive ZR-75-1/GFP/puro	GFP+ and estrogen-independent
GDS1956_disease.state_6_11_mod.txt	GEO	GDS1956	-1.18726265802	Homo sapiens	Various muscle diseases (HG-U133A)	disease.state	dysferlin mutation	normal
GDS3113_tissue_7_29_mod.txt	GEO	GDS3113	1.53326473522	Homo sapiens	Various normal tissues	tissue	fetal liver	tonsil
GDS3029_cell.type_1_2_mod.txt	GEO	GDS3029	-6.22973185832	Homo sapiens	Small-cell lung carcinoma cell lines of varying sensitivity to a Bcl-2 antagonist	cell.type	ABT-737 resistant	ABT-737 sensitive
GDS1490_tissue_25_29_mod.txt	GEO	GDS1490	-1.27195311341	Mus musculus	Neural tissue profiling	tissue	pons	spleen
E-GEOD-23938_38_4_7_mod.txt	ArrayExpress	E-GEOD-23938	1.78373865178	Mus musculus	Comprehensive genomic profiling identified miRNA signatures associated with mammary tumor differentiation and development	FactorValue..GENETICALLY.ENGINEERED.MOUSE.MODEL.	MMTV-H2N	MMTV-Wnt
GDS3142_tissue_9_10_mod.txt	GEO	GDS3142	-2.62428816129	Mus musculus	Various tissues	tissue	heart	kidney
E-GEOD-13093_28_3_7_mod.txt	ArrayExpress	E-GEOD-13093	-1.78182400608	Mus musculus	Feeding schedule and the circadian clock shape rhythms in hepatic gene expression	FactorValue..STRAIN.OR.LINE.	C57/B6, Gender: male, Age: 8-12 weeks, Condition:: Fed	Cry1,Cry2 double KO, Gender: female, Age: 8-16 weeks, Condition: temporally restricted food availability CT1(25)-CT9(33)
E-GEOD-23583_50_1_3_mod.txt	ArrayExpress	E-GEOD-23583	-1.42102772839	Homo sapiens	Highly efficient reprogramming to pluripotency and directed differentiation using synthetic mRNA	FactorValue..CELL.TYPE.	BJ fibroblast	iPS cells derived from BJ fibroblast
E-GEOD-30164_39_3_4_mod.txt	ArrayExpress	E-GEOD-30164	6.94936065376	Mus musculus	Transcriptome transfer provides a model for understanding the phenotype of cardiomyocytes	FactorValue..CELL.TYPE.	cardiomyocyte, single cell	fibroblast transcriptome TIPeRed fibroblast, single cell
GDS3113_tissue_10_11_mod.txt	GEO	GDS3113	-1.45429571612	Homo sapiens	Various normal tissues	tissue	kidney	liver
GDS1522_tissue_3_6_mod.txt	GEO	GDS1522	-3.63363235314	Mus musculus	Forebrain neuronal subtypes	tissue	cingulate cortex homogenate	somatosensory cortex
E-MEXP-1717_36_1_2_mod.txt	ArrayExpress	E-MEXP-1717	1.27837114088	Mus musculus	Transcription profiling of mouse spinal cord from mock-infected and Theilers murine encephalomyelitis (TME)-virus infected animals - time series	Factor.Value..DISEASE_STATE.	mock control	TMEV infected
E-GEOD-13093_28_3_4_mod.txt	ArrayExpress	E-GEOD-13093	-2.55774612917	Mus musculus	Feeding schedule and the circadian clock shape rhythms in hepatic gene expression	FactorValue..STRAIN.OR.LINE.	C57/B6, Gender: male, Age: 8-12 weeks, Condition:: Fed	Cry1,Cry2 double KO mice, Gender: female, Age: 8-16 weeks, Condition: ad libitum food availability
E-GEOD-24207_47_9_20_mod.txt	ArrayExpress	E-GEOD-24207	1.41808488995	Mus musculus	mRNA analysis in different mouse tissues	FactorValue..TISSUE.	kidney	small intestine
E-GEOD-12305_41_1_2_mod.txt	ArrayExpress	E-GEOD-12305	1.49327329834	Homo sapiens	A 5 Sequence of Human HMGB2 Gene for Transcriptional Targeting of Glioblastoma	FactorValue..GROWTH.MEDIUM.	Astrocyte Basal Medium (ABM) and the following growth supplements: rhEGF, 0.5 ml; Insulin, 1.25 ml; Ascorbic Acid, 0.5 ml; GA-1000, 0.5 ml, L-Glutamine, 5.0 ml; FBS, 15 ml.	Dulbecco's Modified Eagle Medium and the following growth supplements: Penicillin/streptomycin, 5.0 ml; L-Glutamine, 5.0 ml; FBS, 15 ml.
GDS1490_tissue_5_29_mod.txt	GEO	GDS1490	-1.28560500331	Mus musculus	Neural tissue profiling	tissue	cerebellum	spleen
E-GEOD-20124_28_1_4_mod.txt	ArrayExpress	E-GEOD-20124	1.41233159842	Homo sapiens	Transcriptome analysis of human Whartons jelly stem cells: in-house analysis	FactorValue..CELL.TYPE.	embryonic carcinoma cell line	Wharton's jelly stem cell line
E-MEXP-2360_27_2_4_mod.txt	ArrayExpress	E-MEXP-2360	-1.89185397436	Homo sapiens	Transcription profiling of human memory B cells to plasma cells differentiation time course	Factor.Value.CELL_TYPE.	bone marrow plasma cells	plasmablasts
GDS3516_disease.state_6_8_mod.txt	GEO	GDS3516	1.51233967984	Homo sapiens	Nodular lymphocyte-predominant Hodgkin lymphoma: lymphocytic and histiocytic cells	disease.state	normal centroblasts	normal memory B-cells
GDS1316_cell.type_1_2_mod.txt	GEO	GDS1316	2.72007338566	Mus musculus	GATA-1 variant role in Down syndrome megakaryocytic leukemias	cell.type	megakaryocyte	megakaryocyte progenitor
GDS913_individual_8_15_mod.txt	GEO	GDS913	2.13133738505	Homo sapiens	DNA damage from ultraviolet and ionizing radiation effect on peripheral blood lymphocytes	individual	NoCa2	NoCa9
GDS3142_tissue_2_12_mod.txt	GEO	GDS3142	2.83835912533	Mus musculus	Various tissues	tissue	adrenal gland	lung
E-GEOD-9894_31_2_4_mod.txt	ArrayExpress	E-GEOD-9894	-4.38716654234	Homo sapiens	Transcription profiling of human culture-amplified and native bone marrow mesenchymal stem cells to characterize specific plasma membrane protein phenotype	Factor.Value.cell.type.	granulopoietic	mesenchymal stem cell
E-GEOD-26408_33_5_6_mod.txt	ArrayExpress	E-GEOD-26408	4.94796445562	Mus musculus	Signatures of murine B-cell development implicate Yy1 as a regulator of the germinal center-specific program	FactorValue..CELL.TYPE.	Purified Plasma cells (B220-low/Cd138-positive/Cd93-negative)	Purified Plasmablasts (B220-positive/Cd138-positive/Cd93-negative)
E-GEOD-27280_34_4_5_mod.txt	ArrayExpress	E-GEOD-27280	-2.67912316942	Homo sapiens	Pompe disease induced pluripotent stem cells for pathogenesis modeling, drug testing and disease marker identification	FactorValue..CELL.TYPE.	PomD-iPSC-CMLC	PomD-iPSCs
GDS3516_disease.state_2_9_mod.txt	GEO	GDS3516	-2.55416784998	Homo sapiens	Nodular lymphocyte-predominant Hodgkin lymphoma: lymphocytic and histiocytic cells	disease.state	classical Hodgkin lymphoma	normal naive B-cells
E-GEOD-24207_47_2_17_mod.txt	ArrayExpress	E-GEOD-24207	1.94838087608	Mus musculus	mRNA analysis in different mouse tissues	FactorValue..TISSUE.	adrenal gland	placenta
GDS3142_tissue_1_19_mod.txt	GEO	GDS3142	-3.41951011165	Mus musculus	Various tissues	tissue	adipose tissue	small intestine
GDS3113_tissue_7_17_mod.txt	GEO	GDS3113	2.70007040583	Homo sapiens	Various normal tissues	tissue	fetal liver	placenta
E-MEXP-565_41_2_3_mod.txt	ArrayExpress	E-MEXP-565	-1.56481703975	Mus musculus	Transcription profiling of mouse liver and kidney from PAR bZip triple knockout mice to wild-type or heterozygous mutant mice to identify genes contributing to the morbidity of PAR bZIP triple KO mice and circadian liver detoxification	Factor.Value..genotype.	HLF (+/-) DBP(+/-) TEF (+/-)	HLF (+/+) DBP(+/+) TEF (+/+)
E-GEOD-7869_29_1_4_mod.txt	ArrayExpress	E-GEOD-7869	-2.76915099642	Homo sapiens	Transcription profiling by array of human renal cysts from patients with autosomal dominant polycystic kidney disease	Factor.Value.histology.	large cyst	normal
GDS3113_tissue_2_5_mod.txt	GEO	GDS3113	-1.50712317882	Homo sapiens	Various normal tissues	tissue	bone marrow	fetal brain
GDS3113_tissue_23_32_mod.txt	GEO	GDS3113	1.58231011215	Homo sapiens	Various normal tissues	tissue	small intestine	uterus
GDS2917_tissue_1_3_mod.txt	GEO	GDS2917	1.01159677963	Mus musculus	Various brain regions of several inbred strains	tissue	bed nucleus of the stria terminalis	hypothalamus
GDS3113_tissue_16_17_mod.txt	GEO	GDS3113	1.2072405962	Homo sapiens	Various normal tissues	tissue	peripheral blood lymphocyte	placenta
GDS2615_time_1_4_mod.txt	GEO	GDS2615	-2.37342549554	Homo sapiens	Mucociliary differentiation of airway epithelial cells	time	0 d	14 d
E-GEOD-20244_37_2_7_mod.txt	ArrayExpress	E-GEOD-20244	1.02023354123	Mus musculus	A comprehensive methylome map of lineage commitment from hematopoietic progenitors	FactorValue..PROGENITOR.POPULATION.	CMP	MMPFL-
GDS3113_tissue_15_23_mod.txt	GEO	GDS3113	1.47860279629	Homo sapiens	Various normal tissues	tissue	pancreas	small intestine
E-GEOD-30164_39_1_3_mod.txt	ArrayExpress	E-GEOD-30164	-4.69442729831	Mus musculus	Transcriptome transfer provides a model for understanding the phenotype of cardiomyocytes	FactorValue..CELL.TYPE.	cardiomyocyte transcriptome TIPeRed astrocyte, single cell	cardiomyocyte, single cell
GDS3113_tissue_7_9_mod.txt	GEO	GDS3113	1.66385001601	Homo sapiens	Various normal tissues	tissue	fetal liver	heart
GDS3113_tissue_2_7_mod.txt	GEO	GDS3113	-2.36414288485	Homo sapiens	Various normal tissues	tissue	bone marrow	fetal liver
GDS3113_tissue_15_28_mod.txt	GEO	GDS3113	2.94333023206	Homo sapiens	Various normal tissues	tissue	pancreas	thyroid
E-GEOD-15894_23_1_2_mod.txt	ArrayExpress	E-GEOD-15894	-2.14875166895	Mus musculus	Comparison of gene expression in whole blood of mice subjected to normobaric hypoxia in vivo.	Factor.Value..STRESS.	control	normobaric hypoxia
E-GEOD-27628_35_3_5_mod.txt	ArrayExpress	E-GEOD-27628	1.07908282753	Mus musculus	Expression data from affected skin from psoriasis mouse models and normal skin from control mice	FactorValue..STRAIN.	FVB/NCrIBR	ICR/B6D2
E-GEOD-24207_47_16_23_mod.txt	ArrayExpress	E-GEOD-24207	2.91274906359	Mus musculus	mRNA analysis in different mouse tissues	FactorValue..TISSUE.	pituitary gland	thymus
E-GEOD-24207_47_3_8_mod.txt	ArrayExpress	E-GEOD-24207	-8.20717720593	Mus musculus	mRNA analysis in different mouse tissues	FactorValue..TISSUE.	bone marrow	insulinoma
GDS1663_tissue_1_2_mod.txt	GEO	GDS1663	-1.01528272889	Homo sapiens	Expression data from different research centers	tissue	kidney	liver
E-TABM-683_30_1_2_mod.txt	ArrayExpress	E-TABM-683	-4.07554395912	Mus musculus	Transcription profiling of mouse normal mammary gland epithelial populations: basal/myoepithelial	Factor.Value..CellType.	mammary basal/myoepithelial cells	mammary luminal ER- cells
E-GEOD-24207_47_8_19_mod.txt	ArrayExpress	E-GEOD-24207	7.18966177	Mus musculus	mRNA analysis in different mouse tissues	FactorValue..TISSUE.	insulinoma	seminal vesicle
E-TABM-669_25_1_3_mod.txt	ArrayExpress	E-TABM-669	4.17514495096	Mus musculus	Transcription profiling of mouse embryonic stem cell line Sox1Tv2 during neuronal differentiation	Factor.Value..Age.d..	E14+0 days	E14+14 days
E-GEOD-21224_25_1_3_mod.txt	ArrayExpress	E-GEOD-21224	-2.73146815133	Mus musculus	Transcriptional ontogeny of the developing liver	Factor.Value..DEVELOPMENTAL.STAGE.	GD19 mouse	PND67 mouse
E-GEOD-32966_37_2_7_mod.txt	ArrayExpress	E-GEOD-32966	-1.92209392746	Mus musculus	Dermal reprogramming through epidermal activation of beta-catenin	FactorValue..SORTED.CELL.POPULATION.	GFP+ sustained activated D2 dermal fibroblasts	ItgA6+ telogen epidermal keratinocytes
E-GEOD-24207_47_9_17_mod.txt	ArrayExpress	E-GEOD-24207	2.76220119796	Mus musculus	mRNA analysis in different mouse tissues	FactorValue..TISSUE.	kidney	placenta
E-GEOD-24207_47_12_20_mod.txt	ArrayExpress	E-GEOD-24207	-1.74689073936	Mus musculus	mRNA analysis in different mouse tissues	FactorValue..TISSUE.	muscle	small intestine
GDS3113_tissue_18_22_mod.txt	GEO	GDS3113	1.68113108747	Homo sapiens	Various normal tissues	tissue	prostate	skin
E-GEOD-25162_37_1_2_mod.txt	ArrayExpress	E-GEOD-25162	7.78697295349	Homo sapiens	Functional analyses of miR-210 involvement in the aggressive phenotype of high grade breast tumors	FactorValue..CELL.LINE.	MCF7	MDA-MB-231
E-GEOD-24207_47_8_20_mod.txt	ArrayExpress	E-GEOD-24207	6.49471510133	Mus musculus	mRNA analysis in different mouse tissues	FactorValue..TISSUE.	insulinoma	small intestine
E-GEOD-26076_31_1_2_mod.txt	ArrayExpress	E-GEOD-26076	-1.01546380848	Mus musculus	Mouse conjunctival forniceal gene expression during postnatal development and its regulation by Kruppel-like factor 4	FactorValue..DEVELOPMENTAL.STAGE.	Post-natal day 14	Post-natal day 20
GDS2819_individual_6_26_mod.txt	GEO	GDS2819	3.7915727694	Homo sapiens	Leukemic white blood cells and various RNA preparation protocols	individual	patient 14	patient 8
E-GEOD-32966_37_4_8_mod.txt	ArrayExpress	E-GEOD-32966	-2.40619520333	Mus musculus	Dermal reprogramming through epidermal activation of beta-catenin	FactorValue..SORTED.CELL.POPULATION.	GFP+ transient activated D2 dermal fibroblasts	ItgA6+ transient activated D2 epidermal keratinocytes
E-GEOD-24207_47_5_13_mod.txt	ArrayExpress	E-GEOD-24207	1.67779706357	Mus musculus	mRNA analysis in different mouse tissues	FactorValue..TISSUE.	diaphragm	ovary
E-GEOD-20426_40_2_3_mod.txt	ArrayExpress	E-GEOD-20426	-1.42901337507	Mus musculus	Hepatic gene expression during liver regeneration in response to partial hepatectomy: late time points (24h	FactorValue..TREATMENT.	partial hepatectomy	sham partial hepatectomy
GDS3113_tissue_14_26_mod.txt	GEO	GDS3113	-1.72666369157	Homo sapiens	Various normal tissues	tissue	ovary	testis
GDS2819_individual_14_19_mod.txt	GEO	GDS2819	2.68215428126	Homo sapiens	Leukemic white blood cells and various RNA preparation protocols	individual	patient 21	patient 26
E-GEOD-32966_37_3_5_mod.txt	ArrayExpress	E-GEOD-32966	-1.04422219081	Mus musculus	Dermal reprogramming through epidermal activation of beta-catenin	FactorValue..SORTED.CELL.POPULATION.	GFP+ telogen dermal fibroblasts	ItgA6+ neonatal epidermal keratinocytes
GDS3142_tissue_10_22_mod.txt	GEO	GDS3142	2.62709035103	Mus musculus	Various tissues	tissue	kidney	thymus
GDS3142_tissue_14_16_mod.txt	GEO	GDS3142	-1.3054038123	Mus musculus	Various tissues	tissue	ovary	placenta
GDS2671_time_9_10_mod.txt	GEO	GDS2671	2.11322194627	Mus musculus	Embryonic V6.5 stem cell differentiation in vitro (MG-430A)	time	6 h	7 d
GDS3113_tissue_19_26_mod.txt	GEO	GDS3113	-1.94338743278	Homo sapiens	Various normal tissues	tissue	retina	testis
E-MEXP-2539_26_3_9_mod.txt	ArrayExpress	E-MEXP-2539	2.72797451719	Mus musculus	Transcription profiling in primary mouse hepatocytes discriminates between true and false genotoxic compounds	Factor.Value.COMPOUND.	4-NP	Medium
GDS3142_tissue_20_21_mod.txt	GEO	GDS3142	-1.43246230372	Mus musculus	Various tissues	tissue	spleen	testis
GDS3516_disease.state_2_10_mod.txt	GEO	GDS3516	-1.9023321019	Homo sapiens	Nodular lymphocyte-predominant Hodgkin lymphoma: lymphocytic and histiocytic cells	disease.state	classical Hodgkin lymphoma	normal plasma cells
GDS3113_tissue_6_14_mod.txt	GEO	GDS3113	1.34232398874	Homo sapiens	Various normal tissues	tissue	fetal kidney	ovary
GDS2032_tissue_1_2_mod.txt	GEO	GDS2032	-2.86806988347	Mus musculus	Hoxa11/Hoxd11 null mutation effect on the metanephric mesenchyme	tissue	metanephric mesenchyme	ureteric bud
GDS3113_tissue_11_31_mod.txt	GEO	GDS3113	3.00886803667	Homo sapiens	Various normal tissues	tissue	liver	Universal Human Reference RNA
GDS3113_tissue_11_29_mod.txt	GEO	GDS3113	2.0258144962	Homo sapiens	Various normal tissues	tissue	liver	tonsil
E-GEOD-15904_24_2_7_mod.txt	ArrayExpress	E-GEOD-15904	-3.0744909288	Mus musculus	Transcription profiling by array of mouse mammary tumors	Factor.Value..HISTOLOGICAL.SUBTYPE.	EMT	Solid
E-GEOD-21278_33_6_11_mod.txt	ArrayExpress	E-GEOD-21278	-2.74324408569	Mus musculus	A genomic atlas of mouse hypothalamic development	Factor.Value..AGE.	embryonic day 15	postnatal day 21
GDS3113_tissue_1_11_mod.txt	GEO	GDS3113	-1.51807357889	Homo sapiens	Various normal tissues	tissue	adrenal gland	liver
GDS3142_tissue_3_8_mod.txt	GEO	GDS3142	1.39232241506	Mus musculus	Various tissues	tissue	bone marrow	fetus
E-GEOD-24207_47_3_18_mod.txt	ArrayExpress	E-GEOD-24207	-2.57788660323	Mus musculus	mRNA analysis in different mouse tissues	FactorValue..TISSUE.	bone marrow	salivary gland
E-TABM-34_26_2_3_mod.txt	ArrayExpress	E-TABM-34	-2.59531638313	Homo sapiens	Transcription profiling of dendritic cell subsets in human tonsils and blood	Factor.Value..CellType.	BDCA3+ dendritic cell	CD16+ dendritic
E-GEOD-21515_27_1_5_mod.txt	ArrayExpress	E-GEOD-21515	-2.08052347774	Mus musculus	Expression data from mouse ES and iPS cells	Factor.Value..CELL.LINE.	ESC2	IP36D-3
GDS3113_tissue_22_23_mod.txt	GEO	GDS3113	-1.68008196873	Homo sapiens	Various normal tissues	tissue	skin	small intestine
GDS3113_tissue_3_21_mod.txt	GEO	GDS3113	-1.37261823765	Homo sapiens	Various normal tissues	tissue	brain	skeletal muscle
E-GEOD-24207_47_11_20_mod.txt	ArrayExpress	E-GEOD-24207	-3.16035450365	Mus musculus	mRNA analysis in different mouse tissues	FactorValue..TISSUE.	lung	small intestine
E-GEOD-24473_24_1_2_mod.txt	ArrayExpress	E-GEOD-24473	-1.87385251148	Homo sapiens	Ras-Association Domain Family 1C Protein Promotes Breast Cancer Cell Migration	Factor.Value..GENOTYPE.VARIATION.	control	over-expression RASSF1C
GDS2144_age_2_3_mod.txt	GEO	GDS2144	1.81515645228	Mus musculus	Cochlear nucleus postnatal development	age	P21	P7
E-GEOD-24207_47_7_15_mod.txt	ArrayExpress	E-GEOD-24207	-3.49167710683	Mus musculus	mRNA analysis in different mouse tissues	FactorValue..TISSUE.	heart	pancreatic islets
E-GEOD-24207_47_2_10_mod.txt	ArrayExpress	E-GEOD-24207	-1.92807756158	Mus musculus	mRNA analysis in different mouse tissues	FactorValue..TISSUE.	adrenal gland	liver
E-GEOD-24207_47_19_23_mod.txt	ArrayExpress	E-GEOD-24207	1.12262377419	Mus musculus	mRNA analysis in different mouse tissues	FactorValue..TISSUE.	seminal vesicle	thymus
E-GEOD-23583_50_1_7_mod.txt	ArrayExpress	E-GEOD-23583	-1.33757672321	Homo sapiens	Highly efficient reprogramming to pluripotency and directed differentiation using synthetic mRNA	FactorValue..CELL.TYPE.	BJ fibroblast	iPS cells derived from MRC5 fibroblast
E-GEOD-19402_34_3_4_mod.txt	ArrayExpress	E-GEOD-19402	1.35913649005	Mus musculus	Gene expression data from hippocampus	FactorValue..TISSUE.TYPE.	Drd2-MSNs	hippocampus
GDS3113_tissue_20_32_mod.txt	GEO	GDS3113	2.57431433096	Homo sapiens	Various normal tissues	tissue	salivary gland	uterus
GDS3113_tissue_16_21_mod.txt	GEO	GDS3113	-1.38679675017	Homo sapiens	Various normal tissues	tissue	peripheral blood lymphocyte	skeletal muscle
E-GEOD-32966_37_4_5_mod.txt	ArrayExpress	E-GEOD-32966	-1.14673018889	Mus musculus	Dermal reprogramming through epidermal activation of beta-catenin	FactorValue..SORTED.CELL.POPULATION.	GFP+ transient activated D2 dermal fibroblasts	ItgA6+ neonatal epidermal keratinocytes
GDS2819_disease.state_1_5_mod.txt	GEO	GDS2819	1.50455981447	Homo sapiens	Leukemic white blood cells and various RNA preparation protocols	disease.state	ALL with hyperdiploid karyotype	AML with t 11q23, MLL
E-GEOD-34208_41_1_2_mod.txt	ArrayExpress	E-GEOD-34208	-1.66963566121	Mus musculus	Expression data of mouse ENCCs and mouse embryonic Gut E14.5	FactorValue..GENOTYPE.VARIATION.	Transgenic mice carrying Wnt1-Cre-recombinase and a LoxP/R26-YFP	wild type
E-MEXP-3111_37_1_2_mod.txt	ArrayExpress	E-MEXP-3111	-5.49437030175	Homo sapiens	Interactome of Human Embryo Implantation: Identification of Gene Expression Pathways, Regulation, and Integrated Regulatory Networks.	Factor.Value.OrganismPart.	endometrium	whole_organism
E-GEOD-35366_38_7_8_mod.txt	ArrayExpress	E-GEOD-35366	-1.9459271039	Mus musculus	Global developmental gene expression and pathway analysis of normal brain development and mouse models of human neuronal migration defects	FactorValue..GENOTYPE.	mutant Ndel ko/+ inbred	mutant Ndel ko/+ mix background
GDS3113_tissue_29_32_mod.txt	GEO	GDS3113	1.26503255112	Homo sapiens	Various normal tissues	tissue	tonsil	uterus
E-GEOD-30950_38_4_5_mod.txt	ArrayExpress	E-GEOD-30950	1.07018617802	Homo sapiens	Human Natural Killer Cell activation by mycobacteria	FactorValue..DONOR.	I2	J2
GDS589_tissue_4_10_mod.txt	GEO	GDS589	4.7622872007	Rattus norvegicus	Multiple normal tissue gene expression across strains	tissue	cerebellum	endothelial cells
E-MEXP-2539_29_1_2_mod.txt	ArrayExpress	E-MEXP-2539	1.85929678661	Mus musculus	Transcription profiling in primary mouse hepatocytes discriminates between true and false genotoxic compounds	Factor.Value.TIME.	24	48
GDS3142_tissue_2_11_mod.txt	GEO	GDS3142	-1.49388109845	Mus musculus	Various tissues	tissue	adrenal gland	liver
E-GEOD-15904_24_2_4_mod.txt	ArrayExpress	E-GEOD-15904	-2.23390644406	Mus musculus	Transcription profiling by array of mouse mammary tumors	Factor.Value..HISTOLOGICAL.SUBTYPE.	EMT	Mix
E-GEOD-32334_31_2_6_mod.txt	ArrayExpress	E-GEOD-32334	-2.05017959418	Mus musculus	Developmental timecourse of mouse ocular lens and whole embryo control	FactorValue..STAGE.	E10.5-12.5	E13.5
E-TABM-669_25_3_6_mod.txt	ArrayExpress	E-TABM-669	-1.61243490536	Mus musculus	Transcription profiling of mouse embryonic stem cell line Sox1Tv2 during neuronal differentiation	Factor.Value..Age.d..	E14+14 days	E14+6 days
E-GEOD-30494_38_1_2_mod.txt	ArrayExpress	E-GEOD-30494	-8.38944842718	Homo sapiens	Expression data in cancer cell lines using Affymetrix GeneChip	FactorValue..CELL.LINE.	A549	SW780
GDS3113_tissue_14_21_mod.txt	GEO	GDS3113	-3.16385233305	Homo sapiens	Various normal tissues	tissue	ovary	skeletal muscle
GDS1363_disease.state_1_2_mod.txt	GEO	GDS1363	-1.55128472767	Rattus norvegicus	N-methyl-N-nitrosourea-induced breast cancer model	disease.state	normal	tumor
E-GEOD-17880_36_2_3_mod.txt	ArrayExpress	E-GEOD-17880	3.52799540214	Mus musculus	Expression data from B6C3F1 mice treated with 2-butoxyethanol and reduced oxygen	FactorValue..TISSUE.	Liver	Spleen
E-GEOD-29045_30_1_4_mod.txt	ArrayExpress	E-GEOD-29045	1.32455860556	Mus musculus	Genetic modification of STAT5 levels reveals dose-dependent and isoform-specific requirement for cell lineage progression and differentiation.	FactorValue..VARIATION.	Stat5a-/-	Stat5abnull/Stat5b-
E-GEOD-24207_47_1_6_mod.txt	ArrayExpress	E-GEOD-24207	-1.17648524021	Mus musculus	mRNA analysis in different mouse tissues	FactorValue..TISSUE.	adipose tissue	eye
E-GEOD-24207_47_4_6_mod.txt	ArrayExpress	E-GEOD-24207	3.44829434345	Mus musculus	mRNA analysis in different mouse tissues	FactorValue..TISSUE.	brain	eye
E-GEOD-34907_29_1_2_mod.txt	ArrayExpress	E-GEOD-34907	-1.40966237445	Mus musculus	Genetic and epigenetic determinants of neurogenesis and myogenesis [expression profiling]	FactorValue..CELL.TYPE.	Neuronally differentiated MEF cells	Neuronally differentiated P19 cells
E-GEOD-26862_34_1_2_mod.txt	ArrayExpress	E-GEOD-26862	1.65591000474	Homo sapiens	Expression data of human eGFP-SOX17+ endoderm cells	FactorValue..CELL.TYPE.	H9 human embryonic stem cells	hSOX17-2 derived stage 1 endoderm
GDS3135_tissue_2_3_mod.txt	GEO	GDS3135	4.40911299397	Rattus norvegicus	Brown adipose tissue response to fasting	tissue	liver	white adipose tissue
E-GEOD-32967_39_1_2_mod.txt	ArrayExpress	E-GEOD-32967	2.07403374273	Homo sapiens	Modeling lethal prostate cancer variant with small cell carcinoma features [expression profile]	FactorValue..HISTOLOGIC.TYPE.	adenocarcinoma	large cell neuroendocrine carcinoma
E-GEOD-30056_37_3_4_mod.txt	ArrayExpress	E-GEOD-30056	3.68444827215	Mus musculus	Reconstitution of the mouse germ-cell specification pathway in culture by pluripotent stem cells	FactorValue..CELL.TYPE.	epiblast like cells (EpiLCs)	epiblast stem cells (EpiSCs)
E-GEOD-13887_27_1_2_mod.txt	ArrayExpress	E-GEOD-13887	1.81242009011	Homo sapiens	Transcription profiling by array of human CD3-positive T cells from patients with systemic lupus erythematosus	Factor.Value.stimulus.	CD3/CD28	nitric oxide
GDS3113_tissue_7_30_mod.txt	GEO	GDS3113	1.72844883021	Homo sapiens	Various normal tissues	tissue	fetal liver	trachea
E-GEOD-21278_33_9_11_mod.txt	ArrayExpress	E-GEOD-21278	-1.89084873701	Mus musculus	A genomic atlas of mouse hypothalamic development	Factor.Value..AGE.	embryonic day 18	postnatal day 21
GDS3142_tissue_12_17_mod.txt	GEO	GDS3142	-2.49040089917	Mus musculus	Various tissues	tissue	lung	salivary gland
E-GEOD-24210_47_1_3_mod.txt	ArrayExpress	E-GEOD-24210	-2.69869869354	Mus musculus	Interleukin-35-mediated induction of a novel regulatory T cell population	FactorValue..TREATMENT.	control protein	untreated
E-GEOD-37258_34_1_3_mod.txt	ArrayExpress	E-GEOD-37258	-2.93709221212	Homo sapiens	Expression data of the iPSCs derived from foreskin fibroblast cells of normal person and KS patient	FactorValue..CELL.TYPE.	fibroblast	iPSC
GDS3142_tissue_2_6_mod.txt	GEO	GDS3142	1.29838672083	Mus musculus	Various tissues	tissue	adrenal gland	embryonic stem cells
E-GEOD-24207_47_9_12_mod.txt	ArrayExpress	E-GEOD-24207	2.71309825129	Mus musculus	mRNA analysis in different mouse tissues	FactorValue..TISSUE.	kidney	muscle
E-GEOD-29328_32_1_5_mod.txt	ArrayExpress	E-GEOD-29328	-2.14738807965	Mus musculus	Expression data from squamous cell carcinoma stem cells	FactorValue..GENOTYPE.	K14cre;FAK(fl/fl)	wild type
E-GEOD-24797_38_2_4_mod.txt	ArrayExpress	E-GEOD-24797	-1.2750488571	Mus musculus	Common and overlapping oncogenic pathways contribute to the evolution of acute myeloid leukemias	FactorValue..TRANSDUCTION.PROTOCOL.	transduced with AML1-ETO oncogene	transduced with MOZ-TIF2 oncogene
E-GEOD-23938_38_4_9_mod.txt	ArrayExpress	E-GEOD-23938	1.79549951396	Mus musculus	Comprehensive genomic profiling identified miRNA signatures associated with mammary tumor differentiation and development	FactorValue..GENETICALLY.ENGINEERED.MOUSE.MODEL.	MMTV-H2N	p53-/-
GDS1522_tissue_2_3_mod.txt	GEO	GDS1522	3.78794091557	Mus musculus	Forebrain neuronal subtypes	tissue	cingulate cortex	cingulate cortex homogenate
GDS2214_individual_2_3_mod.txt	GEO	GDS2214	-1.12484182127	Homo sapiens	Septic neutrophil response to lipopolysaccharide and high mobility group box 1 protein	individual	patient 15	patient 19
E-TABM-1091_29_2_3_mod.txt	ArrayExpress	E-TABM-1091	1.32533478076	Homo sapiens	Transcriptiion profiling by array of human ratiometric mixes of high quality RNA from different tissues using different labeling protocols to provide a mechanism for assessing process improvement	Factor.Value..MIX.	liver only	Mix1
GDS2819_individual_2_23_mod.txt	GEO	GDS2819	-3.27868825855	Homo sapiens	Leukemic white blood cells and various RNA preparation protocols	individual	patient 10	patient 5
E-GEOD-24207_47_5_11_mod.txt	ArrayExpress	E-GEOD-24207	2.02211874636	Mus musculus	mRNA analysis in different mouse tissues	FactorValue..TISSUE.	diaphragm	lung
E-GEOD-31938_32_1_2_mod.txt	ArrayExpress	E-GEOD-31938	-1.4148119955	Mus musculus	Hypothalamus	FactorValue..GENOTYPE.	nestin-Pex5 -/-	wild type
E-TABM-1108_31_2_6_mod.txt	ArrayExpress	E-TABM-1108	2.54614694245	Mus musculus	Evaluation of methylmercury on neural development in Embryonic Stem Cell Differentiation Cultures	Factor.Value..TIME.	3	7
E-TABM-672_24_4_9_mod.txt	ArrayExpress	E-TABM-672	2.7614380314	Mus musculus	Transcription profiling of mouse embyronic stem cell line CGR8 during the first 10 days of differentiation into embryoid bodies	Factor.Value..Age.	3	10
E-GEOD-27628_35_1_5_mod.txt	ArrayExpress	E-GEOD-27628	1.12838575613	Mus musculus	Expression data from affected skin from psoriasis mouse models and normal skin from control mice	FactorValue..STRAIN.	C57BL/6	ICR/B6D2
GDS3113_tissue_18_24_mod.txt	GEO	GDS3113	1.26585512518	Homo sapiens	Various normal tissues	tissue	prostate	spinal cord
GDS3113_tissue_22_30_mod.txt	GEO	GDS3113	-1.16762031271	Homo sapiens	Various normal tissues	tissue	skin	trachea
GDS3113_tissue_23_24_mod.txt	GEO	GDS3113	1.26480600645	Homo sapiens	Various normal tissues	tissue	small intestine	spinal cord
GDS638_age_1_3_mod.txt	GEO	GDS638	-1.1417753912	Mus musculus	Dystrophin-deficient mdx diaphram muscle development time course	age	112 day	23 day
GDS1490_tissue_15_29_mod.txt	GEO	GDS1490	-1.02344611511	Mus musculus	Neural tissue profiling	tissue	inferior colliculus	spleen
GDS3516_disease.state_5_7_mod.txt	GEO	GDS3516	-2.54169907385	Homo sapiens	Nodular lymphocyte-predominant Hodgkin lymphoma: lymphocytic and histiocytic cells	disease.state	nodular lymphocyte-predominant Hodgkin lymphoma	normal centrocytes
GDS1629_protocol_1_5_mod.txt	GEO	GDS1629	-2.78870382781	Rattus norvegicus	Immortalized suprachiasmatic nucleus cell line across circadian cycles: time course	protocol	biological replicate 1	technical replicate 2
GDS1759_tissue_1_2_mod.txt	GEO	GDS1759	1.50060570275	Rattus norvegicus	Retinas under a light-dark cycle and in constant dim light: time course	tissue	pineal gland	retina
E-GEOD-28185_36_1_2_mod.txt	ArrayExpress	E-GEOD-28185	-1.35931088864	Homo sapiens	Non-steroidal anti-inflammatory drugs induce apoptosis and differentiation through an AP-1 and GADD45 dependent pathway in human acute myeloid leukemia cells	FactorValue..DISEASE.STATE.	monocytic leukemia	promyelocytic leukemia
E-GEOD-2822_19_1_2_mod.txt	ArrayExpress	E-GEOD-2822	-4.93275484008	Homo sapiens	Transcription profiling time series of human epidermal keratinocytes treated with Oncostatin-M	Factor.Value..CellType.	epidermal keratinocyte	Skinethic keratinocyte
GDS254_tissue_1_2_mod.txt	GEO	GDS254	-2.10219545153	Rattus norvegicus	Muscle, normal extraocular, profile	tissue	extraocular skeletal muscle	tibialis anterior skeletal muscle
E-GEOD-36643_30_1_4_mod.txt	ArrayExpress	E-GEOD-36643	3.53659160989	Homo sapiens	Ganglioside GD2 identifies Breast Cancer Stem Cells: Targeting GD3 Synthase Inhibits GD2 Expression and Tumor Growth	FactorValue..FACS.SORTED.CELL.POPULATION.	CD24_high	GD2+
E-GEOD-18483_31_5_6_mod.txt	ArrayExpress	E-GEOD-18483	-1.34348282629	Mus musculus	Leukemias of different origins	FactorValue..CELL.TYPE.	leukemia stem cels originated form HSC	MEP
GDS2819_individual_20_21_mod.txt	GEO	GDS2819	-1.42823404299	Homo sapiens	Leukemic white blood cells and various RNA preparation protocols	individual	patient 27	patient 3
GDS3113_tissue_17_23_mod.txt	GEO	GDS3113	-1.48408323164	Homo sapiens	Various normal tissues	tissue	placenta	small intestine
E-GEOD-30056_37_4_5_mod.txt	ArrayExpress	E-GEOD-30056	-2.22466459294	Mus musculus	Reconstitution of the mouse germ-cell specification pathway in culture by pluripotent stem cells	FactorValue..CELL.TYPE.	epiblast stem cells (EpiSCs)	primordial germ cell (PGC) like cells (PGCLCs)
E-GEOD-30201_38_7_8_mod.txt	ArrayExpress	E-GEOD-30201	3.05653454827	Homo sapiens	Expression data of ribosomal proteins from sorted hematopoietic stems cells from patients with low risk MDS.	FactorValue..AGE.	77	age matched
GDS3113_tissue_14_18_mod.txt	GEO	GDS3113	-2.05494733705	Homo sapiens	Various normal tissues	tissue	ovary	prostate
GDS3113_tissue_27_32_mod.txt	GEO	GDS3113	1.31684806486	Homo sapiens	Various normal tissues	tissue	thymus	uterus
E-GEOD-26408_35_2_3_mod.txt	ArrayExpress	E-GEOD-26408	1.62305545889	Mus musculus	Signatures of murine B-cell development implicate Yy1 as a regulator of the germinal center-specific program	FactorValue..ORGANISM.PART.	spleen	Tumor
E-GEOD-18483_31_1_6_mod.txt	ArrayExpress	E-GEOD-18483	-1.71087581728	Mus musculus	Leukemias of different origins	FactorValue..CELL.TYPE.	CMP	MEP
E-GEOD-32966_37_3_6_mod.txt	ArrayExpress	E-GEOD-32966	-2.45396798393	Mus musculus	Dermal reprogramming through epidermal activation of beta-catenin	FactorValue..SORTED.CELL.POPULATION.	GFP+ telogen dermal fibroblasts	ItgA6+ sustained activated D2 epidermal keratinocytes
E-GEOD-22787_37_2_4_mod.txt	ArrayExpress	E-GEOD-22787	-7.23350143786	Homo sapiens	Affymetrix HG-U133A 2.0 Expression data	FactorValue..GENOTYPE.VARIATION.	homozygous deletion at the CDKN2A locus	wild type BRAF, NRAS, and CDKN2A
E-GEOD-23009_38_2_4_mod.txt	ArrayExpress	E-GEOD-23009	-2.0642398211	Mus musculus	Effect of intra-cytoplasmic sperm injection (ICSI) on gene expression and development of mouse preimplantation embryos	FactorValue..GROUP.	ICSI embryos cultured in KSOMaa	IVF embryos cultured in WM
GDS3142_tissue_14_22_mod.txt	GEO	GDS3142	-1.54800909815	Mus musculus	Various tissues	tissue	ovary	thymus
GDS1018_protocol_1_2_mod.txt	GEO	GDS1018	3.9077484014	Rattus norvegicus	Brain hippocampal neurons response to brief preconditioning seizures	protocol	control	preconditioning seizure
E-GEOD-24207_47_4_14_mod.txt	ArrayExpress	E-GEOD-24207	-2.40361565219	Mus musculus	mRNA analysis in different mouse tissues	FactorValue..TISSUE.	brain	pancreatic acini
GDS3142_tissue_7_19_mod.txt	GEO	GDS3142	-2.49890307156	Mus musculus	Various tissues	tissue	eye	small intestine
GDS1491_agent_2_3_mod.txt	GEO	GDS1491	-1.21460573523	Rattus norvegicus	Calcineurin overexpression effect on astrocytes	agent	control	lacZ
GDS3142_tissue_1_21_mod.txt	GEO	GDS3142	-3.19248167381	Mus musculus	Various tissues	tissue	adipose tissue	testis
GDS3113_tissue_9_14_mod.txt	GEO	GDS3113	1.6060353765	Homo sapiens	Various normal tissues	tissue	heart	ovary
GDS1490_tissue_1_23_mod.txt	GEO	GDS1490	1.18815965305	Mus musculus	Neural tissue profiling	tissue	adrenal	perirhinal cortex
GDS3113_tissue_11_23_mod.txt	GEO	GDS3113	1.70853693518	Homo sapiens	Various normal tissues	tissue	liver	small intestine
GDS3113_tissue_2_10_mod.txt	GEO	GDS3113	-1.40239692972	Homo sapiens	Various normal tissues	tissue	bone marrow	kidney
E-MEXP-2146_29_4_5_mod.txt	ArrayExpress	E-MEXP-2146	1.39919241813	Homo sapiens	Transcription profiling of human hematopoietic stem cells in a unilineage culture system	Factor.Value..GROWTH_CONDITION.	megakaryocytic unilineage culture	monocytic unilineage culture
E-GEOD-13987_34_1_2_mod.txt	ArrayExpress	E-GEOD-13987	-4.52861416325	Homo sapiens	Transcription profiling of human B lineage chronic lymphocytic leukemia, normal B, and normal T cells treated with rolipram, a PDE4 inhibitor	Factor.Value.cell.type.	B cell	mononuclear
E-GEOD-19639_26_2_3_mod.txt	ArrayExpress	E-GEOD-19639	-1.77233262892	Homo sapiens	Transcription profiling by array of human estrogen receptor positive breast cancer cell lines after long-term estrogen deprivation	Factor.Value..cell.line.	MCF-7	MDA-361
E-GEOD-21063_41_1_2_mod.txt	ArrayExpress	E-GEOD-21063	2.21538326533	Mus musculus	NFATc1 controls the survival	FactorValue..TIME.STIMULATED.WITH.ANTI.IGM.	16h	3h
E-GEOD-24207_47_2_23_mod.txt	ArrayExpress	E-GEOD-24207	1.65796141529	Mus musculus	mRNA analysis in different mouse tissues	FactorValue..TISSUE.	adrenal gland	thymus
GDS3233_disease.state_1_3_mod.txt	GEO	GDS3233	3.46808213927	Homo sapiens	Cervical cancer tumorigenesis	disease.state	cervical cancer cell line	normal
E-GEOD-30164_40_3_5_mod.txt	ArrayExpress	E-GEOD-30164	-5.8723911791	Mus musculus	Transcriptome transfer provides a model for understanding the phenotype of cardiomyocytes	FactorValue..TRANSFECTED.TRANSCRIPTOME.	fibroblast	No transfection
E-GEOD-24210_44_1_2_mod.txt	ArrayExpress	E-GEOD-24210	-2.69278817992	Mus musculus	Interleukin-35-mediated induction of a novel regulatory T cell population	FactorValue..BATCH.		not applicable
GDS3142_tissue_15_16_mod.txt	GEO	GDS3142	2.95211183983	Mus musculus	Various tissues	tissue	pituitary gland	placenta
E-GEOD-29949_54_2_3_mod.txt	ArrayExpress	E-GEOD-29949	-2.46184343702	Mus musculus	Gene expression comparison among spleen dendritic cells	FactorValue..CELL.PHENOTYPE.	Lin- (CD19-CD3-NK1.1-B220-Ter119-) CD11c+CD8+.	Lin- (CD19-CD3-NK1.1-B220-Ter119-) CD45intCD11c-
E-MEXP-2360_27_3_4_mod.txt	ArrayExpress	E-MEXP-2360	-2.8903712775	Homo sapiens	Transcription profiling of human memory B cells to plasma cells differentiation time course	Factor.Value.CELL_TYPE.	memory B cells	plasmablasts
E-GEOD-34126_43_1_4_mod.txt	ArrayExpress	E-GEOD-34126	1.96035576151	Mus musculus	An Animal Model of Myc-driven medulloblastoma	FactorValue..GENOTYPE.VARIATION.	not specified	wild type
GDS1962_disease.state_1_2_mod.txt	GEO	GDS1962	1.5482302621	Homo sapiens	Glioma-derived stem cell factor effect on angiogenesis in the brain	disease.state	astrocytomas	glioblastomas
E-GEOD-13093_28_1_4_mod.txt	ArrayExpress	E-GEOD-13093	-1.81173542703	Mus musculus	Feeding schedule and the circadian clock shape rhythms in hepatic gene expression	FactorValue..STRAIN.OR.LINE.	C57/B6, Gender: male, Age: 8-12 weeks	Cry1,Cry2 double KO mice, Gender: female, Age: 8-16 weeks, Condition: ad libitum food availability
GDS2261_agent_1_2_mod.txt	GEO	GDS2261	-1.40826855007	Rattus norvegicus	Liver response to various toxins	agent	alpha-naphthylisothiocyanate	caerulein
GDS2261_agent_1_4_mod.txt	GEO	GDS2261	-1.34437539186	Rattus norvegicus	Liver response to various toxins	agent	alpha-naphthylisothiocyanate	dinitrophenol
GDS589_tissue_4_28_mod.txt	GEO	GDS589	1.25339997885	Rattus norvegicus	Multiple normal tissue gene expression across strains	tissue	cerebellum	thymus
GDS1290_time_1_4_mod.txt	GEO	GDS1290	1.04489783414	Homo sapiens	CD4+ lymphocyte polarization into Th1 and Th2 cells in the presence of TGFbeta: time course (HG-U95A)	time	0 h	6 h
E-GEOD-21419_36_3_5_mod.txt	ArrayExpress	E-GEOD-21419	1.14475408488	Mus musculus	Laser Capture Microdissection of Hyperlipidemic Mouse Aorta Atherosclerosis	FactorValue..ORGANISM.PART.	adventitia with ATLO of abdominal aorta within atherosclerotic lesion area	media of abdominal aorta
E-GEOD-15901_23_1_2_mod.txt	ArrayExpress	E-GEOD-15901	-1.3133191388	Mus musculus	Comparison of gene expression in whole blood of mice subjected to hypobaric hypoxia at Mt. Everest in vivo.	Factor.Value..STRESS.	control	hypobaric hypoxia
E-GEOD-32670_60_1_2_mod.txt	ArrayExpress	E-GEOD-32670	8.14320936135	Homo sapiens	Time-course effect of estradiol and estradiol-BSA on early gene expression	FactorValue..CELL.LINE.	MCF-7	MDA-MB-231
E-MEXP-955_50_1_5_mod.txt	ArrayExpress	E-MEXP-955	-1.53702562434	Mus musculus	Transcription profiling of mouse embryonic stem cells	Factor.Value..organism.part.	embryonic stem cells	pluripotent cells derived from late epiblast layer of embryos at pre- or early gastrulation stage
GDS3142_tissue_10_12_mod.txt	GEO	GDS3142	3.40552270969	Mus musculus	Various tissues	tissue	kidney	lung
E-GEOD-24207_47_16_17_mod.txt	ArrayExpress	E-GEOD-24207	3.29080266114	Mus musculus	mRNA analysis in different mouse tissues	FactorValue..TISSUE.	pituitary gland	placenta
E-GEOD-17256_32_1_2_mod.txt	ArrayExpress	E-GEOD-17256	-1.25662115035	Mus musculus	Comparison of gene expression profiles between human and mouse monocyte subsets [mouse data]	FactorValue..MONOCYTE.SUBSETS.	Gr1hi (Ly-6chi) monocytes	Gr1lo (Ly-6clo) monocytes
E-TABM-672_24_1_6_mod.txt	ArrayExpress	E-TABM-672	4.76760580685	Mus musculus	Transcription profiling of mouse embyronic stem cell line CGR8 during the first 10 days of differentiation into embryoid bodies	Factor.Value..Age.	0	5
E-TABM-672_24_3_6_mod.txt	ArrayExpress	E-TABM-672	3.99676245433	Mus musculus	Transcription profiling of mouse embyronic stem cell line CGR8 during the first 10 days of differentiation into embryoid bodies	Factor.Value..Age.	2	5
E-GEOD-27220_37_3_4_mod.txt	ArrayExpress	E-GEOD-27220	-1.77607886375	Homo sapiens	Transcriptional effects of 1,25 dihydroxi-vitamin D3 physiological and supra-physiological concentrations in breast cancer organotypic culture	FactorValue..AGE.	74	76
E-MEXP-2539_26_8_10_mod.txt	ArrayExpress	E-MEXP-2539	-2.12789922218	Mus musculus	Transcription profiling in primary mouse hepatocytes discriminates between true and false genotoxic compounds	Factor.Value.COMPOUND.	EtOH	MitC
E-GEOD-27515_38_2_3_mod.txt	ArrayExpress	E-GEOD-27515	-7.66914200621	Homo sapiens	Isolation and characterization of a metastatic hybrid cell line generated by ER negative and ER positive breast cancer cells in mouse bone marrow	FactorValue..CELL.LINE.	MDA231	ZR75
GDS3142_tissue_7_18_mod.txt	GEO	GDS3142	-2.42457574516	Mus musculus	Various tissues	tissue	eye	seminal vesicle
E-GEOD-24207_47_16_22_mod.txt	ArrayExpress	E-GEOD-24207	2.00975453584	Mus musculus	mRNA analysis in different mouse tissues	FactorValue..TISSUE.	pituitary gland	testis
GDS505_disease.state_1_2_mod.txt	GEO	GDS505	1.43088491968	Homo sapiens	Renal clear cell carcinoma (HG-U133A)	disease.state	normal	RCC
E-GEOD-31172_38_1_2_mod.txt	ArrayExpress	E-GEOD-31172	-1.73003467426	Homo sapiens	Expression analysis of mutant U2AF35 transduced cells	FactorValue..CELL.LINE.	HeLa	TF-1
E-GEOD-17482_23_1_2_mod.txt	ArrayExpress	E-GEOD-17482	6.14747633207	Homo sapiens	Gene expression profiles regulated by Stat5a/b vs. Stat3 in human prostate cancer cells.	Factor.Value..CELL.LINE.	CWR22Rv1	DU145
E-GEOD-25098_33_2_3_mod.txt	ArrayExpress	E-GEOD-25098	-2.30344536547	Mus musculus	Rhabdomyosarcoma can be initiated in activated Pax7+ Muscle Progenitor Cells	FactorValue..TISSUE.	Lineage Depleted Tumor	Normal Muscle
GDS3113_tissue_1_13_mod.txt	GEO	GDS3113	1.16939030719	Homo sapiens	Various normal tissues	tissue	adrenal gland	mammary gland
E-GEOD-36618_38_1_2_mod.txt	ArrayExpress	E-GEOD-36618	3.13988842155	Mus musculus	Mechanisms of terminal erythroid differentiation defect in EKLF-deficient mice	FactorValue..VARIATION.	EKLF knock out	wild-type
E-GEOD-35366_38_1_8_mod.txt	ArrayExpress	E-GEOD-35366	-3.64671786963	Mus musculus	Global developmental gene expression and pathway analysis of normal brain development and mouse models of human neuronal migration defects	FactorValue..GENOTYPE.	mutant 14-3-3 ko/ko	mutant Ndel ko/+ mix background
GDS3113_tissue_12_29_mod.txt	GEO	GDS3113	-1.45502565828	Homo sapiens	Various normal tissues	tissue	lung	tonsil
E-GEOD-24207_47_20_23_mod.txt	ArrayExpress	E-GEOD-24207	1.45787406486	Mus musculus	mRNA analysis in different mouse tissues	FactorValue..TISSUE.	small intestine	thymus
E-TABM-672_24_1_8_mod.txt	ArrayExpress	E-TABM-672	5.03850474205	Mus musculus	Transcription profiling of mouse embyronic stem cell line CGR8 during the first 10 days of differentiation into embryoid bodies	Factor.Value..Age.	0	7
GDS1607_tissue_1_2_mod.txt	GEO	GDS1607	-4.45937061557	Mus musculus	Muscle glycogen content effect on skeletal muscle	tissue	anterior tibialis	liver
E-GEOD-27628_35_4_5_mod.txt	ArrayExpress	E-GEOD-27628	1.24154856785	Mus musculus	Expression data from affected skin from psoriasis mouse models and normal skin from control mice	FactorValue..STRAIN.	FVB/NHsd	ICR/B6D2
E-GEOD-24207_47_6_23_mod.txt	ArrayExpress	E-GEOD-24207	-1.16352200979	Mus musculus	mRNA analysis in different mouse tissues	FactorValue..TISSUE.	eye	thymus
GDS3142_tissue_14_17_mod.txt	GEO	GDS3142	-2.87068963362	Mus musculus	Various tissues	tissue	ovary	salivary gland
E-GEOD-20244_37_5_8_mod.txt	ArrayExpress	E-GEOD-20244	3.53917485487	Mus musculus	A comprehensive methylome map of lineage commitment from hematopoietic progenitors	FactorValue..PROGENITOR.POPULATION.	DN3	MMPFL+
E-GEOD-30138_43_1_3_mod.txt	ArrayExpress	E-GEOD-30138	1.05783068842	Mus musculus	Global Gene Expression Analysis of Murine Limb Development	FactorValue..DEVELOPMENTAL.STAGE.	E10.5	E12.5
E-GEOD-22139_37_1_4_mod.txt	ArrayExpress	E-GEOD-22139	1.91020104301	Homo sapiens	Bone morphogenetic protein-7 is a MYC target with pro-survival functions in childhood medulloblastoma	FactorValue..GENETIC.MODIFICATION.	none (wildtype)	siRNA cMYC silenced
GDS2385_tissue_1_3_mod.txt	GEO	GDS2385	5.69106990618	Rattus norvegicus	Targretin, 9-cis retinoic acid, and 4-hydroxyphenylretinamide effect on various organs	tissue	liver	mammary gland
E-GEOD-18136_38_1_2_mod.txt	ArrayExpress	E-GEOD-18136	-1.19071447457	Mus musculus	Punctual ablation of Foxp3+ T cells unleashes an autoimmune lesion	FactorValue..CELL.TYPE.	CD4 T cells, pancreas draining lymph node	CD4 T cells, pancreas infiltrating
E-GEOD-21278_33_5_10_mod.txt	ArrayExpress	E-GEOD-21278	-1.82352801801	Mus musculus	A genomic atlas of mouse hypothalamic development	Factor.Value..AGE.	embryonic day 14	postnatal day 0
E-GEOD-24207_47_8_22_mod.txt	ArrayExpress	E-GEOD-24207	6.49183457282	Mus musculus	mRNA analysis in different mouse tissues	FactorValue..TISSUE.	insulinoma	testis
E-GEOD-18483_31_2_6_mod.txt	ArrayExpress	E-GEOD-18483	-1.58735655217	Mus musculus	Leukemias of different origins	FactorValue..CELL.TYPE.	GMP	MEP
E-GEOD-24207_47_3_14_mod.txt	ArrayExpress	E-GEOD-24207	-4.94976437355	Mus musculus	mRNA analysis in different mouse tissues	FactorValue..TISSUE.	bone marrow	pancreatic acini
E-GEOD-7869_29_3_5_mod.txt	ArrayExpress	E-GEOD-7869	1.14807482729	Homo sapiens	Transcription profiling by array of human renal cysts from patients with autosomal dominant polycystic kidney disease	Factor.Value.histology.	non cystic	small cyst
GDS3113_tissue_8_21_mod.txt	GEO	GDS3113	-1.02488284742	Homo sapiens	Various normal tissues	tissue	fetal thymus	skeletal muscle
E-GEOD-33199_29_4_9_mod.txt	ArrayExpress	E-GEOD-33199	1.74752427844	Mus musculus	A mouse model of the most aggressive subgroup of human medulloblastoma [Mouse430 2]	FactorValue..VARIATION.	p53-/-, Cdkn2c-/- infected with hcMyc/GFP	p53floxed, Nestin-Cre, Cdkn2c-/-
GDS2819_individual_23_26_mod.txt	GEO	GDS2819	3.79638811167	Homo sapiens	Leukemic white blood cells and various RNA preparation protocols	individual	patient 5	patient 8
GDS3113_tissue_9_11_mod.txt	GEO	GDS3113	-2.15639977699	Homo sapiens	Various normal tissues	tissue	heart	liver
E-GEOD-12305_42_1_2_mod.txt	ArrayExpress	E-GEOD-12305	1.49327329834	Homo sapiens	A 5 Sequence of Human HMGB2 Gene for Transcriptional Targeting of Glioblastoma	FactorValue..PASSAGE.	4	50
E-GEOD-31545_39_1_2_mod.txt	ArrayExpress	E-GEOD-31545	2.45384890018	Homo sapiens	Stem-like glioma-propagating cells contribute to molecular heterogeneity and survival outcome in oligodendroglial tumors	FactorValue..GRADE.	III	IV
E-GEOD-27628_35_2_5_mod.txt	ArrayExpress	E-GEOD-27628	1.92954994397	Mus musculus	Expression data from affected skin from psoriasis mouse models and normal skin from control mice	FactorValue..STRAIN.	CD1	ICR/B6D2
GDS1490_tissue_23_29_mod.txt	GEO	GDS1490	-1.66348026075	Mus musculus	Neural tissue profiling	tissue	perirhinal cortex	spleen
E-GEOD-19616_36_2_3_mod.txt	ArrayExpress	E-GEOD-19616	-1.30534662997	Mus musculus	Gene expression profiling of mouse p53-deficient epidermal carcinoma defines molecular determinants of human cancer malignancy (testing dataset)	FactorValue..HISTOLOGICAL.SUBTYPE.	not specified	poorly differentiated
E-GEOD-24207_47_6_15_mod.txt	ArrayExpress	E-GEOD-24207	-4.37383147738	Mus musculus	mRNA analysis in different mouse tissues	FactorValue..TISSUE.	eye	pancreatic islets
GDS3113_tissue_21_32_mod.txt	GEO	GDS3113	2.69226422688	Homo sapiens	Various normal tissues	tissue	skeletal muscle	uterus
E-GEOD-21419_36_2_5_mod.txt	ArrayExpress	E-GEOD-21419	1.48000515746	Mus musculus	Laser Capture Microdissection of Hyperlipidemic Mouse Aorta Atherosclerosis	FactorValue..ORGANISM.PART.	adventitia of abdominal aorta outside of atherosclerotic lesion area	media of abdominal aorta
E-GEOD-21515_27_1_4_mod.txt	ArrayExpress	E-GEOD-21515	-2.3673676811	Mus musculus	Expression data from mouse ES and iPS cells	Factor.Value..CELL.LINE.	ESC2	IP20D-3
E-GEOD-21278_33_2_8_mod.txt	ArrayExpress	E-GEOD-21278	-1.58164437908	Mus musculus	A genomic atlas of mouse hypothalamic development	Factor.Value..AGE.	embryonic day 11	embryonic day 17
GDS1209_disease.state_1_2_mod.txt	GEO	GDS1209	1.36314659456	Homo sapiens	Sarcoma and hypoxia	disease.state	normal	sarcoma
E-GEOD-29458_33_1_3_mod.txt	ArrayExpress	E-GEOD-29458	-3.51066531918	Mus musculus	Expression data from PDGF driven mouse tumors	FactorValue..GENOTYPE.	Ptenf/f	wild type
GDS3113_tissue_16_19_mod.txt	GEO	GDS3113	1.99377932409	Homo sapiens	Various normal tissues	tissue	peripheral blood lymphocyte	retina
E-GEOD-24207_47_5_21_mod.txt	ArrayExpress	E-GEOD-24207	1.07693635942	Mus musculus	mRNA analysis in different mouse tissues	FactorValue..TISSUE.	diaphragm	spleen
GDS3113_tissue_8_11_mod.txt	GEO	GDS3113	-1.62346566786	Homo sapiens	Various normal tissues	tissue	fetal thymus	liver
GDS3113_tissue_26_32_mod.txt	GEO	GDS3113	1.25507558541	Homo sapiens	Various normal tissues	tissue	testis	uterus
E-GEOD-15192_23_1_2_mod.txt	ArrayExpress	E-GEOD-15192	5.274455656	Homo sapiens	Differences between CD44+/CD24- and CD44-/CD24+ subpopulation of immortalized human mammary epithelial cells	Factor.Value..CELL.SURFACE.MARKERS.	CD44 negative, CD24 positive	CD44 positive, CD24 negative
E-GEOD-31980_30_1_2_mod.txt	ArrayExpress	E-GEOD-31980	3.13915994396	Homo sapiens	Transcriptome profile in the human synovial MSC-aggregates	FactorValue..CELL.TYPE.	synovial MSC-aggregates	synovial MSCs
GDS183_disease.state_2_3_mod.txt	GEO	GDS183	-2.16872474965	Homo sapiens	Bladder tumor stage classification	disease.state	tumor stage T2+	tumor stage Ta
E-GEOD-25119_44_1_3_mod.txt	ArrayExpress	E-GEOD-25119	2.55705380044	Homo sapiens	Comparison of CD4+ T cells from human fetal and adult donors	FactorValue..PHENOTYPE.	CD3+CD4+CD25bright	not specified
E-GEOD-18281_36_4_5_mod.txt	ArrayExpress	E-GEOD-18281	-3.0323957758	Mus musculus	Spatial mapping of thymic stromal microenvironments reveals unique features influencing T lymphoid differentiation	FactorValue..TISSUE.	Sub-capsular cortex	Whole cortex
E-GEOD-24547_44_2_4_mod.txt	ArrayExpress	E-GEOD-24547	2.06816544882	Homo sapiens	Transcriptional pathway signatures for the Aurora inhibitor Danusertib	FactorValue..CELL.LINE.	COLO205	MCF7
E-TABM-1108_31_1_6_mod.txt	ArrayExpress	E-TABM-1108	2.3228145092	Mus musculus	Evaluation of methylmercury on neural development in Embryonic Stem Cell Differentiation Cultures	Factor.Value..TIME.	0	7
E-GEOD-21278_33_3_7_mod.txt	ArrayExpress	E-GEOD-21278	-1.46599976819	Mus musculus	A genomic atlas of mouse hypothalamic development	Factor.Value..AGE.	embryonic day 12	embryonic day 16
E-GEOD-29382_39_4_5_mod.txt	ArrayExpress	E-GEOD-29382	-1.02069153998	Mus musculus	Characterisation of early thymic progenitors and thymus seeding progenitors	FactorValue..SAMPLE.TYPE.	hematopoietic stem cell	putative thymus seeding progenitor
E-GEOD-15904_24_3_8_mod.txt	ArrayExpress	E-GEOD-15904	1.58234137433	Mus musculus	Transcription profiling by array of mouse mammary tumors	Factor.Value..HISTOLOGICAL.SUBTYPE.	Microacinar	Squamous
E-GEOD-24207_47_3_9_mod.txt	ArrayExpress	E-GEOD-24207	-3.42680375206	Mus musculus	mRNA analysis in different mouse tissues	FactorValue..TISSUE.	bone marrow	kidney
E-GEOD-32670_60_2_4_mod.txt	ArrayExpress	E-GEOD-32670	-8.10247398363	Homo sapiens	Time-course effect of estradiol and estradiol-BSA on early gene expression	FactorValue..CELL.LINE.	MDA-MB-231	T47D
GDS3113_tissue_17_20_mod.txt	GEO	GDS3113	-2.47608745045	Homo sapiens	Various normal tissues	tissue	placenta	salivary gland
E-GEOD-30499_44_1_2_mod.txt	ArrayExpress	E-GEOD-30499	-2.27601392451	Homo sapiens	Inhibition of nonsense-mediated RNA decay by the tumor microenvironment promotes tumorigenesis	FactorValue..SAMPLING.TIME.POINT.	0 hr	1.5 hrs
E-GEOD-18669_37_1_4_mod.txt	ArrayExpress	E-GEOD-18669	1.54268408528	Mus musculus	Analysis of murine hematopoieitic stem cells	FactorValue..CELL.TYPE.	hematopoieitic stem cells (HSC)	Pre-Megakaryocyte/Erythrocyte progenitors (PreMegE)
E-GEOD-35338_36_2_3_mod.txt	ArrayExpress	E-GEOD-35338	-3.219434915	Mus musculus	Expression data from reactive astrocytes acutely purified from young adult mouse brains	FactorValue..TREATMENT.	MCAO-induced stroke	saline injection
E-MEXP-2963_30_1_2_mod.txt	ArrayExpress	E-MEXP-2963	1.3861127517	Mus musculus	Transcription profiling by array of mouse embryonic stem cells from wildtype and LRRK2-deficient mice to investigate the effects of LRRK2 on neuronal differentiation	Factor.Value..GENOTYPE.	LRKK2+/- knock out	wild_type
E-GEOD-26104_39_2_6_mod.txt	ArrayExpress	E-GEOD-26104	-2.41831082405	Homo sapiens	Search for specific biomarkers of IFN-beta bioactivity in patients with MS	FactorValue..AGE.	35	53
E-GEOD-24207_47_1_5_mod.txt	ArrayExpress	E-GEOD-24207	-2.58101126166	Mus musculus	mRNA analysis in different mouse tissues	FactorValue..TISSUE.	adipose tissue	diaphragm
GDS3113_tissue_10_12_mod.txt	GEO	GDS3113	2.02654443836	Homo sapiens	Various normal tissues	tissue	kidney	lung
E-GEOD-21278_33_10_11_mod.txt	ArrayExpress	E-GEOD-21278	-1.4629658506	Mus musculus	A genomic atlas of mouse hypothalamic development	Factor.Value..AGE.	postnatal day 0	postnatal day 21
E-GEOD-24207_47_7_8_mod.txt	ArrayExpress	E-GEOD-24207	-7.71510627729	Mus musculus	mRNA analysis in different mouse tissues	FactorValue..TISSUE.	heart	insulinoma
GDS3142_tissue_10_13_mod.txt	GEO	GDS3142	2.35723826754	Mus musculus	Various tissues	tissue	kidney	muscle
E-GEOD-21515_27_3_5_mod.txt	ArrayExpress	E-GEOD-21515	-1.25095007542	Mus musculus	Expression data from mouse ES and iPS cells	Factor.Value..CELL.LINE.	IP14D-101	IP36D-3
GDS3113_tissue_9_17_mod.txt	GEO	GDS3113	1.03622038982	Homo sapiens	Various normal tissues	tissue	heart	placenta
GDS3142_tissue_15_18_mod.txt	GEO	GDS3142	2.48974717572	Mus musculus	Various tissues	tissue	pituitary gland	seminal vesicle
GDS3142_tissue_7_21_mod.txt	GEO	GDS3142	-2.15574748089	Mus musculus	Various tissues	tissue	eye	testis
E-GEOD-26523_36_1_3_mod.txt	ArrayExpress	E-GEOD-26523	-1.50812095393	Homo sapiens	Transcriptional targets of EphB2 and Ephrin-A4 signaling in epidermal keratinocytes	FactorValue..TIME.	1h	48h
E-GEOD-25119_43_2_4_mod.txt	ArrayExpress	E-GEOD-25119	-2.68749767935	Homo sapiens	Comparison of CD4+ T cells from human fetal and adult donors	FactorValue..ORIGINAL.CELLS.	fetal bone marrow HSC	not specified
GDS2819_individual_2_20_mod.txt	GEO	GDS2819	-1.30044615912	Homo sapiens	Leukemic white blood cells and various RNA preparation protocols	individual	patient 10	patient 27
E-GEOD-25119_44_2_3_mod.txt	ArrayExpress	E-GEOD-25119	2.58606431568	Homo sapiens	Comparison of CD4+ T cells from human fetal and adult donors	FactorValue..PHENOTYPE.	CD3+CD4+CD45RA+CCR7+CD27+	not specified
GDS1490_tissue_1_26_mod.txt	GEO	GDS1490	1.36614539053	Mus musculus	Neural tissue profiling	tissue	adrenal	retina
E-GEOD-25098_32_6_7_mod.txt	ArrayExpress	E-GEOD-25098	-1.99911994572	Mus musculus	Rhabdomyosarcoma can be initiated in activated Pax7+ Muscle Progenitor Cells	FactorValue..GENOTYPE.VARIATION.	Rosa26-CreER; LSL-KrasG12D;Trp53Flox/Flox	Wild Type mice
GDS3142_tissue_18_22_mod.txt	GEO	GDS3142	1.35163479562	Mus musculus	Various tissues	tissue	seminal vesicle	thymus
GDS2819_individual_10_18_mod.txt	GEO	GDS2819	-1.91676215143	Homo sapiens	Leukemic white blood cells and various RNA preparation protocols	individual	patient 18	patient 25
GDS3592_specimen_1_2_mod.txt	GEO	GDS3592	2.77820637695	Homo sapiens	Ovarian normal surface epithelia and ovarian cancer epithelial cells	specimen	ovarian cancer epithelial cells	ovarian surface epithelia
E-GEOD-20524_29_1_2_mod.txt	ArrayExpress	E-GEOD-20524	1.8087994375	Mus musculus	Blood Gene Expression Signatures Predict Invasive Candidiasis	Factor.Value..COHORT.	C.albicans Initial Signature Cohort	C.albicans Signature Validation Cohort
GDS1956_disease.state_2_5_mod.txt	GEO	GDS1956	1.56165444532	Homo sapiens	Various muscle diseases (HG-U133A)	disease.state	amyotophic lateral sclerosis	Duchenne muscular dystrophy
E-GEOD-14990_26_1_2_mod.txt	ArrayExpress	E-GEOD-14990	4.70088543709	Homo sapiens	MYC regulation of a poor prognosis metastatic cancer cell state	Factor.Value..CELL.LINE.	LNCaP	MCF10A
E-GEOD-15129_29_1_2_mod.txt	ArrayExpress	E-GEOD-15129	2.75329372231	Mus musculus	Coenzyme Q10-dependent gene expression in SAMP1 mice tissues	Factor.Value..TISSUE.	brain	heart
E-GEOD-24207_47_10_17_mod.txt	ArrayExpress	E-GEOD-24207	3.77034602398	Mus musculus	mRNA analysis in different mouse tissues	FactorValue..TISSUE.	liver	placenta
E-GEOD-25488_41_2_3_mod.txt	ArrayExpress	E-GEOD-25488	1.52436841425	Mus musculus	Expression data from C3(1)Tag mammary tumors	FactorValue..TISSUE.	primary mammary tumor	tissue culture cells
E-GEOD-14580_43_1_2_mod.txt	ArrayExpress	E-GEOD-14580	-2.33506713438	Homo sapiens	Mucosal gene signatures to predict response to infliximab in patients with ulcerative colitis	FactorValue..RESPONSE.TO.INFLIXIMAB.	No	Not applicable
E-GEOD-28598_47_1_2_mod.txt	ArrayExpress	E-GEOD-28598	-1.56985289923	Mus musculus	Protection from obesity and diabetes by blockade of TGF-beta/Smad3 signaling	FactorValue..TREATMENT.	diet induced obese	high fat diet
E-GEOD-21278_33_2_9_mod.txt	ArrayExpress	E-GEOD-21278	-1.80253409772	Mus musculus	A genomic atlas of mouse hypothalamic development	Factor.Value..AGE.	embryonic day 11	embryonic day 18
GDS3113_tissue_6_11_mod.txt	GEO	GDS3113	-2.42011116475	Homo sapiens	Various normal tissues	tissue	fetal kidney	liver
E-GEOD-35366_38_1_7_mod.txt	ArrayExpress	E-GEOD-35366	-1.85860533811	Mus musculus	Global developmental gene expression and pathway analysis of normal brain development and mouse models of human neuronal migration defects	FactorValue..GENOTYPE.	mutant 14-3-3 ko/ko	mutant Ndel ko/+ inbred
GDS1054_age_2_4_mod.txt	GEO	GDS1054	-1.80417330709	Rattus norvegicus	Iron deficiency effect on duodenum: time course (RAE230A)	age	21 d	6 wk
GDS1629_cell.type_1_2_mod.txt	GEO	GDS1629	2.49013958761	Rattus norvegicus	Immortalized suprachiasmatic nucleus cell line across circadian cycles: time course	cell.type	SCN	SCN2.2 cell line
GDS63_time_2_8_mod.txt	GEO	GDS63	1.58932913478	Rattus norvegicus	Spinal cord injury and regeneration time course: at T9 (RG-U34A)	time	0.5 h	2 d
E-TABM-1108_31_2_5_mod.txt	ArrayExpress	E-TABM-1108	2.097348193	Mus musculus	Evaluation of methylmercury on neural development in Embryonic Stem Cell Differentiation Cultures	Factor.Value..TIME.	3	6
GDS3113_tissue_10_32_mod.txt	GEO	GDS3113	1.83655133121	Homo sapiens	Various normal tissues	tissue	kidney	uterus
E-GEOD-31082_36_3_4_mod.txt	ArrayExpress	E-GEOD-31082	-3.16756557323	Mus musculus	Gene expression analysis of thymocyte subsets	FactorValue..CELL.TYPE.	CD4+CD8-TCRb(hi) thymocytes	CD4+CD8+ thymocytes
E-GEOD-12454_38_1_2_mod.txt	ArrayExpress	E-GEOD-12454	-1.60640969249	Mus musculus	The SWI/SNF protein ATRX co-regulates pseudoautosomal genes that have translocated to autosomes in the mouse genome	FactorValue..AGE.	E13.5	P0.5
GDS1265_development.stage_2_3_mod.txt	GEO	GDS1265	4.71266345179	Mus musculus	Oocyte development (MOE430A)	development.stage	primary follicle	primordial follicle
E-GEOD-22381_38_1_2_mod.txt	ArrayExpress	E-GEOD-22381	-4.19349381504	Mus musculus	Identification of downstream transcriptional targets of Dlx5 during early mouse inner ear (otocyst/otic vesicle) development	FactorValue..AGE.	4 days post-differentiation in-vitro	E10
E-MEXP-3282_30_1_2_mod.txt	ArrayExpress	E-MEXP-3282	1.28736633319	Mus musculus	Transcription profiling by array of ApoE3Leiden mice exposed to high doses of cholesterol and rosuvastatin	Factor.Value.Compound.	Fenofibrate	N-(2,2,2-trifluoroethyl)-N-[4-[2,2,2-trifluoro-1-hydroxy-1-(trifluoromethyl)ethyl]phenyl]-benzenesulfonamide
GDS509_time_1_6_mod.txt	GEO	GDS509	-1.8077447758	Rattus norvegicus	Fracture healing timecourse and the effect of age	time	1 week post_fracture	pre-fracture
E-GEOD-24207_47_15_23_mod.txt	ArrayExpress	E-GEOD-24207	3.27056104752	Mus musculus	mRNA analysis in different mouse tissues	FactorValue..TISSUE.	pancreatic islets	thymus
E-GEOD-31082_36_2_4_mod.txt	ArrayExpress	E-GEOD-31082	-3.13752075335	Mus musculus	Gene expression analysis of thymocyte subsets	FactorValue..CELL.TYPE.	CD4-CD8+TCRb(hi) thymocytes	CD4+CD8+ thymocytes
GDS3113_tissue_5_15_mod.txt	GEO	GDS3113	-1.11963532812	Homo sapiens	Various normal tissues	tissue	fetal brain	pancreas
GDS3142_tissue_9_14_mod.txt	GEO	GDS3142	1.2830768345	Mus musculus	Various tissues	tissue	heart	ovary
GDS2671_time_7_10_mod.txt	GEO	GDS2671	4.06149139933	Mus musculus	Embryonic V6.5 stem cell differentiation in vitro (MG-430A)	time	48 h	7 d
GDS3113_tissue_4_25_mod.txt	GEO	GDS3113	1.18442701005	Homo sapiens	Various normal tissues	tissue	colon	spleen
E-GEOD-20244_37_5_6_mod.txt	ArrayExpress	E-GEOD-20244	3.33801769299	Mus musculus	A comprehensive methylome map of lineage commitment from hematopoietic progenitors	FactorValue..PROGENITOR.POPULATION.	DN3	GMP
GDS3142_tissue_15_20_mod.txt	GEO	GDS3142	2.98243970167	Mus musculus	Various tissues	tissue	pituitary gland	spleen
E-GEOD-23938_39_1_3_mod.txt	ArrayExpress	E-GEOD-23938	-2.07701693146	Mus musculus	Comprehensive genomic profiling identified miRNA signatures associated with mammary tumor differentiation and development	FactorValue..STRAIN.	129B6/FVB	FVB
E-GEOD-27424_32_1_2_mod.txt	ArrayExpress	E-GEOD-27424	1.5662729851	Homo sapiens	NOTCH3 knockdown in non-transformed human esophageal cells	FactorValue..VARIATION.	STR-pGIPZ scramble	STR-pGIPZ shNotch3
E-GEOD-13873_35_1_4_mod.txt	ArrayExpress	E-GEOD-13873	6.98659214192	Mus musculus	Expression data from murine gastric epithelium	FactorValue..PATHOLOGY.	gastritis	n/a
E-GEOD-25119_43_1_4_mod.txt	ArrayExpress	E-GEOD-25119	-2.19292161887	Homo sapiens	Comparison of CD4+ T cells from human fetal and adult donors	FactorValue..ORIGINAL.CELLS.	adult bone marrow HSC	not specified
GDS3142_tissue_9_17_mod.txt	GEO	GDS3142	-1.6700021807	Mus musculus	Various tissues	tissue	heart	salivary gland
GDS3142_tissue_2_16_mod.txt	GEO	GDS3142	2.0779229529	Mus musculus	Various tissues	tissue	adrenal gland	placenta
E-MEXP-2539_26_3_6_mod.txt	ArrayExpress	E-MEXP-2539	2.66954484672	Mus musculus	Transcription profiling in primary mouse hepatocytes discriminates between true and false genotoxic compounds	Factor.Value.COMPOUND.	4-NP	DMN
GDS3113_tissue_1_22_mod.txt	GEO	GDS3113	1.87054532501	Homo sapiens	Various normal tissues	tissue	adrenal gland	skin
E-TABM-1108_31_2_4_mod.txt	ArrayExpress	E-TABM-1108	1.30502167708	Mus musculus	Evaluation of methylmercury on neural development in Embryonic Stem Cell Differentiation Cultures	Factor.Value..TIME.	3	5
E-GEOD-29949_55_1_2_mod.txt	ArrayExpress	E-GEOD-29949	-2.97618207873	Mus musculus	Gene expression comparison among spleen dendritic cells	FactorValue..CELL.TYPE.	dendritic cell	microglia
E-GEOD-35751_30_1_2_mod.txt	ArrayExpress	E-GEOD-35751	3.10107643936	Mus musculus	Comparative analysis of S100a10-expressing cortical pyramidal cells and whole cortex	FactorValue..RNA.	input	TRAP
E-GEOD-37258_34_1_2_mod.txt	ArrayExpress	E-GEOD-37258	-2.68709917708	Homo sapiens	Expression data of the iPSCs derived from foreskin fibroblast cells of normal person and KS patient	FactorValue..CELL.TYPE.	fibroblast	hESC
E-GEOD-24207_47_18_19_mod.txt	ArrayExpress	E-GEOD-24207	1.28335811787	Mus musculus	mRNA analysis in different mouse tissues	FactorValue..TISSUE.	salivary gland	seminal vesicle
E-GEOD-30304_41_1_2_mod.txt	ArrayExpress	E-GEOD-30304	2.65195333117	Homo sapiens	Gene expression profiling of prostate epithelial cells in response to tissue contextual changes	FactorValue..CELL.LINE.	LNCaP cells (prostate cancer cells)	RWPE-1 (immortalized prostate epithelial cells)
E-GEOD-24207_47_2_8_mod.txt	ArrayExpress	E-GEOD-24207	-6.01518678793	Mus musculus	mRNA analysis in different mouse tissues	FactorValue..TISSUE.	adrenal gland	insulinoma
E-GEOD-13093_28_1_8_mod.txt	ArrayExpress	E-GEOD-13093	-1.91836759459	Mus musculus	Feeding schedule and the circadian clock shape rhythms in hepatic gene expression	FactorValue..STRAIN.OR.LINE.	C57/B6, Gender: male, Age: 8-12 weeks	Cry1,Cry2 double KO, Gender: male, Age: 8-16 weeks, Condition: temporally restricted food availability CT1(25)-CT9(33)
GDS3142_tissue_2_20_mod.txt	GEO	GDS3142	2.16307104154	Mus musculus	Various tissues	tissue	adrenal gland	spleen
GDS3142_tissue_4_5_mod.txt	GEO	GDS3142	2.06160427025	Mus musculus	Various tissues	tissue	brain	diaphragm
E-GEOD-24207_47_3_20_mod.txt	ArrayExpress	E-GEOD-24207	-2.71089062293	Mus musculus	mRNA analysis in different mouse tissues	FactorValue..TISSUE.	bone marrow	small intestine
E-GEOD-24207_47_13_21_mod.txt	ArrayExpress	E-GEOD-24207	-1.01135198954	Mus musculus	mRNA analysis in different mouse tissues	FactorValue..TISSUE.	ovary	spleen
E-GEOD-17728_33_1_3_mod.txt	ArrayExpress	E-GEOD-17728	2.31132061706	Mus musculus	Blood gene expression profile from mouse C57Bl/10 exposed to chronic hypoxia	FactorValue..PROTOCOL.	exposed to chronic hypoxia during two weeks	exposed to PO2 21% during two weeks
E-MEXP-955_44_1_2_mod.txt	ArrayExpress	E-MEXP-955	-2.09552562213	Mus musculus	Transcription profiling of mouse embryonic stem cells	Factor.Value..cell.type.	embryonic stem cell	epiblast
E-GEOD-30355_34_1_3_mod.txt	ArrayExpress	E-GEOD-30355	2.12507192941	Homo sapiens	Human keratinocytes have a response to injury that upregulates CCL20 and other genes linking innate and adaptive immunity	FactorValue..GROUP.	KC LCM	KC vitro
E-GEOD-24628_22_1_2_mod.txt	ArrayExpress	E-GEOD-24628	2.22514923531	Mus musculus	Subtypes of medulloblastoma have distinct developmental origins	Factor.Value..CELL.TYPE.	embryonic dorsal brainstem	medulloblastoma generated by activating Ctnnb1
E-GEOD-20244_37_4_5_mod.txt	ArrayExpress	E-GEOD-20244	-2.96405006948	Mus musculus	A comprehensive methylome map of lineage commitment from hematopoietic progenitors	FactorValue..PROGENITOR.POPULATION.	DN2	DN3
GDS1490_tissue_18_29_mod.txt	GEO	GDS1490	-1.26621595339	Mus musculus	Neural tissue profiling	tissue	medulla oblongata	spleen
E-TABM-717_24_3_4_mod.txt	ArrayExpress	E-TABM-717	2.25648195661	Mus musculus	Transcription profiling of mouse embryonic stem cells in vitro - FunGenES: IMM-1: Neural Differentiation of Embryonic Stem Cells in vitro: a Road Map to Neurogenesis in the Embryo	Factor.Value..Age.	3	4
GDS2958_cell.line_1_2_mod.txt	GEO	GDS2958	6.49285163515	Homo sapiens	Tumor suppressor PTEN depletion effect on various cell lines	cell.line	A431	HCC827
GDS276_tissue_2_4_mod.txt	GEO	GDS276	-1.72450524279	Rattus norvegicus	Muscle profiles	tissue	extraocular muscle	stomach wall smooth muscle
E-MEXP-565_38_1_2_mod.txt	ArrayExpress	E-MEXP-565	-1.42700350971	Mus musculus	Transcription profiling of mouse liver and kidney from PAR bZip triple knockout mice to wild-type or heterozygous mutant mice to identify genes contributing to the morbidity of PAR bZIP triple KO mice and circadian liver detoxification	Factor.Value..organism.part.	kidney	liver
GDS2819_individual_17_19_mod.txt	GEO	GDS2819	2.55196852854	Homo sapiens	Leukemic white blood cells and various RNA preparation protocols	individual	patient 24	patient 26
E-GEOD-18669_37_1_3_mod.txt	ArrayExpress	E-GEOD-18669	1.12617969741	Mus musculus	Analysis of murine hematopoieitic stem cells	FactorValue..CELL.TYPE.	hematopoieitic stem cells (HSC)	multipotent progenitors (MPP)
E-GEOD-24207_47_9_15_mod.txt	ArrayExpress	E-GEOD-24207	-1.09677385354	Mus musculus	mRNA analysis in different mouse tissues	FactorValue..TISSUE.	kidney	pancreatic islets
E-GEOD-16902_33_5_6_mod.txt	ArrayExpress	E-GEOD-16902	-1.26767067219	Mus musculus	Expression data from mouse gastric tumor models	FactorValue..GENOTYPE.	K19-Wnt1/C2mE	wild-type
E-GEOD-35758_30_1_2_mod.txt	ArrayExpress	E-GEOD-35758	2.72056102247	Mus musculus	Comparative analysis of S100a10 and Glt25d2 cortical pyramidal cells	FactorValue..DRIVER.	Glt25d2	S100a10
GDS3113_tissue_10_28_mod.txt	GEO	GDS3113	1.71896865483	Homo sapiens	Various normal tissues	tissue	kidney	thyroid
E-GEOD-10971_34_1_2_mod.txt	ArrayExpress	E-GEOD-10971	1.32161789132	Homo sapiens	Transcription profiling by array of human non-malignant fallopian tube epithelium and high grade serous carcinoma	Factor.Value.disease.state.	high grade serous carcinoma	normal
E-MEXP-928_43_2_3_mod.txt	ArrayExpress	E-MEXP-928	-5.05731328328	Mus musculus	Transcription profiling of mouse epidermal cells sorted into three populations based on alpha 6 integrin	Factor.Value..cell.type.	BIB cells	bulge cells
E-GEOD-30056_37_3_5_mod.txt	ArrayExpress	E-GEOD-30056	1.55788144923	Mus musculus	Reconstitution of the mouse germ-cell specification pathway in culture by pluripotent stem cells	FactorValue..CELL.TYPE.	epiblast like cells (EpiLCs)	primordial germ cell (PGC) like cells (PGCLCs)
GDS2671_time_4_10_mod.txt	GEO	GDS2671	3.78807493517	Mus musculus	Embryonic V6.5 stem cell differentiation in vitro (MG-430A)	time	18 h	7 d
E-GEOD-24207_47_15_18_mod.txt	ArrayExpress	E-GEOD-24207	1.94569100237	Mus musculus	mRNA analysis in different mouse tissues	FactorValue..TISSUE.	pancreatic islets	salivary gland
GDS1779_cell.type_1_2_mod.txt	GEO	GDS1779	-2.98510608302	Homo sapiens	Hypoxia effect on astrocytes	cell.type	astrocyte	HeLa
E-GEOD-19675_40_1_2_mod.txt	ArrayExpress	E-GEOD-19675	1.15224554793	Mus musculus	Negative regulation of the IFN/STAT signaling pathway by the Trim24 tumor suppressor protein through Rara inhibition	FactorValue..AGE.	14-week-old	5-week-old
E-GEOD-24207_47_10_22_mod.txt	ArrayExpress	E-GEOD-24207	2.48929789867	Mus musculus	mRNA analysis in different mouse tissues	FactorValue..TISSUE.	liver	testis
E-GEOD-17825_36_1_2_mod.txt	ArrayExpress	E-GEOD-17825	1.09171554501	Mus musculus	Murine fracture healing	FactorValue..INJURY.	1 day post fracture	3 days post fracture
GDS3516_disease.state_2_6_mod.txt	GEO	GDS3516	-2.87538790608	Homo sapiens	Nodular lymphocyte-predominant Hodgkin lymphoma: lymphocytic and histiocytic cells	disease.state	classical Hodgkin lymphoma	normal centroblasts
E-GEOD-33425_30_2_5_mod.txt	ArrayExpress	E-GEOD-33425	-1.42305052833	Homo sapiens	Human MAIT and CD8++ cell development	FactorValue..CELL.SUBTYPE.	CD161++CD8+ T cells	not specified
E-GEOD-21581_25_1_2_mod.txt	ArrayExpress	E-GEOD-21581	1.1800340645	Mus musculus	Expression data from lung adenocarcinoma mouse tumors	Factor.Value..TISSUE.	Lung tumor	Metastasis
GDS3113_tissue_9_15_mod.txt	GEO	GDS3113	-1.9264656381	Homo sapiens	Various normal tissues	tissue	heart	pancreas
E-GEOD-31782_32_1_2_mod.txt	ArrayExpress	E-GEOD-31782	8.07298853003	Homo sapiens	Knock-down and Over-expression of JMJD6 in MCF-7 and/or MDA-MB231	FactorValue..CELL.LINE.	MCF-7	MDA-MB231
E-GEOD-27987_35_4_8_mod.txt	ArrayExpress	E-GEOD-27987	-2.09381739453	Mus musculus	Differential pre-mRNA processing in Crebbp+/- mice	FactorValue..CELL.TYPE.	Crebbp+/- MEF	Ep300+/+ FLHSC
E-GEOD-22798_36_1_3_mod.txt	ArrayExpress	E-GEOD-22798	2.96297426964	Mus musculus	Expression data from Pax7+ satellite cell derived tumors in vitro and in vivo	FactorValue..SAMPLE.TYPE.	normal muscle as control for myogenic tumors	tumors derived from Pax7-expressing cells in vivo
E-GEOD-14519_33_1_4_mod.txt	ArrayExpress	E-GEOD-14519	1.9419257918	Homo sapiens	Transcription profiling by array of human multiple myeloma cell lines after treatment with arsenic	Factor.Value.cell.line.	8226/S	U266
E-GEOD-24207_47_2_3_mod.txt	ArrayExpress	E-GEOD-24207	2.91097797336	Mus musculus	mRNA analysis in different mouse tissues	FactorValue..TISSUE.	adrenal gland	bone marrow
E-GEOD-29328_32_2_5_mod.txt	ArrayExpress	E-GEOD-29328	-5.51425429402	Mus musculus	Expression data from squamous cell carcinoma stem cells	FactorValue..GENOTYPE.	K14cre;TbRII(fl/fl)	wild type
GDS1612_tissue_2_3_mod.txt	GEO	GDS1612	1.47595239337	Rattus norvegicus	Hypothalamoneurohypophyseal system response to dehydration	tissue	paraventricular nucleus	supraoptic nucleus
GDS1265_age_2_4_mod.txt	GEO	GDS1265	5.00514470215	Mus musculus	Oocyte development (MOE430A)	age	17 d	2 d
GDS3142_tissue_9_15_mod.txt	GEO	GDS3142	-2.9004850141	Mus musculus	Various tissues	tissue	heart	pituitary gland
GDS3113_tissue_15_29_mod.txt	GEO	GDS3113	1.79588035731	Homo sapiens	Various normal tissues	tissue	pancreas	tonsil
GDS2819_individual_20_22_mod.txt	GEO	GDS2819	-1.51107409928	Homo sapiens	Leukemic white blood cells and various RNA preparation protocols	individual	patient 27	patient 4
E-GEOD-24207_47_14_17_mod.txt	ArrayExpress	E-GEOD-24207	4.81622193708	Mus musculus	mRNA analysis in different mouse tissues	FactorValue..TISSUE.	pancreatic acini	placenta
E-GEOD-26862_34_1_3_mod.txt	ArrayExpress	E-GEOD-26862	-1.0433669699	Homo sapiens	Expression data of human eGFP-SOX17+ endoderm cells	FactorValue..CELL.TYPE.	H9 human embryonic stem cells	hSOX17-2 derived stage 2 endoderm
E-GEOD-25488_40_1_3_mod.txt	ArrayExpress	E-GEOD-25488	-3.22228398836	Mus musculus	Expression data from C3(1)Tag mammary tumors	FactorValue..GENOTYPE.	brca ko p53 WT	Her2/Neu
E-GEOD-24207_47_12_18_mod.txt	ArrayExpress	E-GEOD-24207	-1.70468466609	Mus musculus	mRNA analysis in different mouse tissues	FactorValue..TISSUE.	muscle	salivary gland
GDS3113_tissue_20_22_mod.txt	GEO	GDS3113	2.67208618754	Homo sapiens	Various normal tissues	tissue	salivary gland	skin
E-GEOD-24207_47_1_18_mod.txt	ArrayExpress	E-GEOD-24207	-3.7157412652	Mus musculus	mRNA analysis in different mouse tissues	FactorValue..TISSUE.	adipose tissue	salivary gland
GDS2237_time_1_4_mod.txt	GEO	GDS2237	-3.17906077629	Rattus norvegicus	Liver response to skin burn: time course	time	1 d	7 d
GDS1608_tissue_2_5_mod.txt	GEO	GDS1608	1.63741161357	Rattus norvegicus	Cocaine addiction effect on reward-related brain regions	tissue	lateral hypothalamus	septum
GDS589_tissue_3_5_mod.txt	GEO	GDS589	-2.56145196237	Rattus norvegicus	Multiple normal tissue gene expression across strains	tissue	bone marrow	cerebral cortex
GDS3113_tissue_18_32_mod.txt	GEO	GDS3113	1.58335923089	Homo sapiens	Various normal tissues	tissue	prostate	uterus
E-GEOD-22139_37_3_4_mod.txt	ArrayExpress	E-GEOD-22139	1.94833624364	Homo sapiens	Bone morphogenetic protein-7 is a MYC target with pro-survival functions in childhood medulloblastoma	FactorValue..GENETIC.MODIFICATION.	pMYCEGFP vector-transfected	siRNA cMYC silenced
GDS3113_tissue_5_19_mod.txt	GEO	GDS3113	2.62958942769	Homo sapiens	Various normal tissues	tissue	fetal brain	retina
E-GEOD-28417_36_1_3_mod.txt	ArrayExpress	E-GEOD-28417	1.71092001793	Mus musculus	Expression data from mouse tissues	FactorValue..ORGANISM.PART.	heart	lung
GDS3113_tissue_21_28_mod.txt	GEO	GDS3113	2.57468155051	Homo sapiens	Various normal tissues	tissue	skeletal muscle	thyroid
E-GEOD-27515_39_1_2_mod.txt	ArrayExpress	E-GEOD-27515	-7.66914200621	Homo sapiens	Isolation and characterization of a metastatic hybrid cell line generated by ER negative and ER positive breast cancer cells in mouse bone marrow	FactorValue..GENOTYPE.	ER negative MDA-MB-231/GFP/Neo cells resistant to G418	ER positive ZR-75-1/GFP/puro
E-GEOD-21278_33_3_11_mod.txt	ArrayExpress	E-GEOD-21278	-3.75262062411	Mus musculus	A genomic atlas of mouse hypothalamic development	Factor.Value..AGE.	embryonic day 12	postnatal day 21
E-GEOD-17906_35_1_5_mod.txt	ArrayExpress	E-GEOD-17906	2.42772518712	Homo sapiens	Transcription profiling by array of human CD90 positive prostate stromal fibromuscular tumor cells	Factor.Value.cell.type.		CD90 positive
E-GEOD-24207_47_1_4_mod.txt	ArrayExpress	E-GEOD-24207	-4.60661726643	Mus musculus	mRNA analysis in different mouse tissues	FactorValue..TISSUE.	adipose tissue	brain
GDS2369_cell.line_1_2_mod.txt	GEO	GDS2369	4.17566867455	Homo sapiens	Epstein-Barr virus nuclear antigen 2 effect on B-cell lines	cell.line	BJABK3	BL41K3
E-GEOD-23584_42_3_6_mod.txt	ArrayExpress	E-GEOD-23584	-2.03391708827	Mus musculus	The Identification of Genetic Factors Influencing Susceptibility to Staphylococcus aureus Infection in mice susceptible and resistant to S. aureus infection	FactorValue..STRAIN.	BALB/cByJ	NOD/ShiLtJ
GDS589_tissue_4_22_mod.txt	GEO	GDS589	-1.0977621871	Rattus norvegicus	Multiple normal tissue gene expression across strains	tissue	cerebellum	pituitary
E-GEOD-15904_24_2_6_mod.txt	ArrayExpress	E-GEOD-15904	-3.11127141566	Mus musculus	Transcription profiling by array of mouse mammary tumors	Factor.Value..HISTOLOGICAL.SUBTYPE.	EMT	Papillary
E-GEOD-31638_39_1_3_mod.txt	ArrayExpress	E-GEOD-31638	-1.79195096252	Mus musculus	Expression data from primary hepatocytes knocking down or overexpressing IRE1a	FactorValue..GENOTYPE.VARIATION.	EGFP overexpression as control	IRE1a wildtype overexpression
E-GEOD-20244_37_5_7_mod.txt	ArrayExpress	E-GEOD-20244	3.77741212315	Mus musculus	A comprehensive methylome map of lineage commitment from hematopoietic progenitors	FactorValue..PROGENITOR.POPULATION.	DN3	MMPFL-
E-GEOD-26408_33_1_5_mod.txt	ArrayExpress	E-GEOD-26408	-6.30632219442	Mus musculus	Signatures of murine B-cell development implicate Yy1 as a regulator of the germinal center-specific program	FactorValue..CELL.TYPE.	Lymphoid tumor	Purified Plasma cells (B220-low/Cd138-positive/Cd93-negative)
GDS1522_tissue_3_5_mod.txt	GEO	GDS1522	-5.24146219427	Mus musculus	Forebrain neuronal subtypes	tissue	cingulate cortex homogenate	lateral geniculate nucleus (thalamus)
GDS2841_tissue_1_3_mod.txt	GEO	GDS2841	-1.7710540288	Rattus norvegicus	Alcohol-preferring inbred strain: brain	tissue	accumbens	caudate-putamen
GDS1629_protocol_2_5_mod.txt	GEO	GDS1629	-2.20772788744	Rattus norvegicus	Immortalized suprachiasmatic nucleus cell line across circadian cycles: time course	protocol	biological replicate 2	technical replicate 2
GDS3142_tissue_2_7_mod.txt	GEO	GDS3142	2.82463519411	Mus musculus	Various tissues	tissue	adrenal gland	eye
GDS3113_tissue_21_30_mod.txt	GEO	GDS3113	1.62241577075	Homo sapiens	Various normal tissues	tissue	skeletal muscle	trachea
E-GEOD-23035_38_1_2_mod.txt	ArrayExpress	E-GEOD-23035	-1.08465523941	Homo sapiens	Expression data from BAP1 depleted cells	FactorValue..TREATMENT.	shBAP1 #1	shBAP1 #2
E-GEOD-18680_37_1_2_mod.txt	ArrayExpress	E-GEOD-18680	3.02544831532	Homo sapiens	Gene expression profile of human ovarian cancer cell lines in vitro	FactorValue..CELL.LINE.	parental IGROV	parental SKOV
E-MEXP-1504_36_2_3_mod.txt	ArrayExpress	E-MEXP-1504	3.5571382979	Mus musculus	Transcription profiling of liver	Factor.Value..organism.part.	liver	lung
E-GEOD-14001_28_1_2_mod.txt	ArrayExpress	E-GEOD-14001	-2.28754409555	Homo sapiens	Transcription profiling by array of human high and low grade ovarian serous carcinomas	Factor.Value.disease.staging.		high grade
GDS2604_cell.line_1_2_mod.txt	GEO	GDS2604	-2.49197154693	Homo sapiens	Asbestos effect on epithelial and mesothelial lung cell lines: time course	cell.line	A549	Beas2B
E-GEOD-31980_32_1_2_mod.txt	ArrayExpress	E-GEOD-31980	3.13915994396	Homo sapiens	Transcriptome profile in the human synovial MSC-aggregates	FactorValue..TREATMENT.	MSC-aggregates cultured in hanging drop culture for 3 days	MSCs in a monolayer culture
E-GEOD-18649_35_3_4_mod.txt	ArrayExpress	E-GEOD-18649	2.66535695056	Mus musculus	Molecular Profiling of the Developing Axial Skeleton: A role for Tgfbr2 in the Development of the Intervertebral Disc.	FactorValue..AGENT.	not specified	TGFb
E-GEOD-34126_41_1_4_mod.txt	ArrayExpress	E-GEOD-34126	-2.38904914805	Mus musculus	An Animal Model of Myc-driven medulloblastoma	FactorValue..CELL.SOURCE.	normal (uninfected) cerebellar stem cells	stem cell-derived tumors
E-GEOD-21063_41_3_4_mod.txt	ArrayExpress	E-GEOD-21063	3.10630403558	Mus musculus	NFATc1 controls the survival	FactorValue..TIME.STIMULATED.WITH.ANTI.IGM.	8h	unstimulated
E-GEOD-26408_34_1_3_mod.txt	ArrayExpress	E-GEOD-26408	-1.50541796731	Mus musculus	Signatures of murine B-cell development implicate Yy1 as a regulator of the germinal center-specific program	FactorValue..GENOTYPE.	Bcl6 knock-in	Lig4/p53 double knock-out
E-GEOD-21299_35_2_4_mod.txt	ArrayExpress	E-GEOD-21299	1.05095034774	Mus musculus	Expression data from murine cell line transduced with epitope tagged forms of Hoxa9	FactorValue..TIME.POINT.	day 3	day 5
E-GEOD-22903_31_2_3_mod.txt	ArrayExpress	E-GEOD-22903	-1.80697198566	Mus musculus	Ribosomal deficiencies in Diamond-Blackfan anemia impair translation of transcripts essential for differentiation of murine and human erythroblasts	FactorValue..SHRNA.	rpl11	rps19
E-GEOD-31972_37_1_2_mod.txt	ArrayExpress	E-GEOD-31972	-2.43472287961	Mus musculus	Transcriptional profiling of ICAM-positive and -negative cells from the mouse olfactory epithelium	FactorValue..CELL.POPULATION.	ICAM1-negative	ICAM1-positive
E-GEOD-38141_37_1_3_mod.txt	ArrayExpress	E-GEOD-38141	1.12876220095	Mus musculus	Chronic dietary intake of quercetin alleviates hepatic fat accumulation associated with consumption of a Western-style diet in C57/BL6J mice	FactorValue..DIET.	AIN93G diet for 20 weeks	Western diet for 20 weeks
E-TABM-1108_31_4_6_mod.txt	ArrayExpress	E-TABM-1108	1.27869325688	Mus musculus	Evaluation of methylmercury on neural development in Embryonic Stem Cell Differentiation Cultures	Factor.Value..TIME.	5	7
GDS1962_tissue_1_4_mod.txt	GEO	GDS1962	2.53250443043	Homo sapiens	Glioma-derived stem cell factor effect on angiogenesis in the brain	tissue	not applicable	tumor grade IV
E-GEOD-32903_31_1_2_mod.txt	ArrayExpress	E-GEOD-32903	1.02335109638	Mus musculus	Smad4 and Trim33 dependend nodal/activin responsive genes in differentiated mouse ESCs	FactorValue..VARIATION.	Smad4-null	Trim33-KD
GDS1490_tissue_22_29_mod.txt	GEO	GDS1490	-1.05441475846	Mus musculus	Neural tissue profiling	tissue	periaqueductal gray	spleen
GDS3113_tissue_7_18_mod.txt	GEO	GDS3113	1.21493805546	Homo sapiens	Various normal tissues	tissue	fetal liver	prostate
E-MEXP-1649_37_2_5_mod.txt	ArrayExpress	E-MEXP-1649	-1.36520108356	Mus musculus	Transcription profiling of mouse liver cells with liver specific deletion of Irs1 and/or Irs2 and Foxo1during fasting and feeding	Factor.Value..GENOTYPE.	Irs1 L/L::Irs2 L/L	Liver Specific Irs1 -/-
E-GEOD-15904_24_3_4_mod.txt	ArrayExpress	E-GEOD-15904	1.49115733576	Mus musculus	Transcription profiling by array of mouse mammary tumors	Factor.Value..HISTOLOGICAL.SUBTYPE.	Microacinar	Mix
GDS1279_tissue_1_2_mod.txt	GEO	GDS1279	1.05308502616	Rattus norvegicus	Age effect on extraocular muscles	tissue	extensor digitorum longus	extraocular muscle
GDS1990_genotype_variation_1_2_mod.txt	GEO	GDS1990	1.63611930418	Mus musculus	Mdr2 knockout model of hepatocellular carcinoma at precancerous stages	genotype_variation	Mdr2 heterozygotes	Mdr2-KO
GDS3113_tissue_11_25_mod.txt	GEO	GDS3113	2.58566684885	Homo sapiens	Various normal tissues	tissue	liver	spleen
E-GEOD-19668_44_1_3_mod.txt	ArrayExpress	E-GEOD-19668	1.20605235705	Mus musculus	Genetic Determinants for Susceptibility to Staphylococcus aureus Infection in A/J and C57BL/6J	FactorValue..TIME.POINT.		2 hours
GDS2880_disease.state_1_3_mod.txt	GEO	GDS2880	1.74325956577	Homo sapiens	Clear cell renal cell carcinoma (HG-U133A)	disease.state	normal	stage II cRCC
E-GEOD-18551_23_1_2_mod.txt	ArrayExpress	E-GEOD-18551	2.38626420684	Mus musculus	Striatum of Huntington's disease model mice [Affymetrix data]	Factor.Value..AGE.	12 months	24 months
E-GEOD-24207_47_2_5_mod.txt	ArrayExpress	E-GEOD-24207	1.76822341689	Mus musculus	mRNA analysis in different mouse tissues	FactorValue..TISSUE.	adrenal gland	diaphragm
GDS2106_genotype_variation_5_11_mod.txt	GEO	GDS2106	2.27449353366	Homo sapiens	Lymphoblastoid cell lines from various CEPH pedigrees	genotype_variation	CEPH pedigree 1345	CEPH pedigree 1362
GDS3113_tissue_4_17_mod.txt	GEO	GDS3113	1.79138032801	Homo sapiens	Various normal tissues	tissue	colon	placenta
GDS3113_tissue_11_16_mod.txt	GEO	GDS3113	1.98537957061	Homo sapiens	Various normal tissues	tissue	liver	peripheral blood lymphocyte
GDS3142_tissue_13_17_mod.txt	GEO	GDS3142	-1.25470404246	Mus musculus	Various tissues	tissue	muscle	salivary gland
E-GEOD-18269_56_1_2_mod.txt	ArrayExpress	E-GEOD-18269	4.89533316789	Homo sapiens	HepaRG cells as a model of the primary human hepatocyte transcriptome	FactorValue..DIFFERENTIATION.STATE.	differentiated	not specified
GDS3113_tissue_3_17_mod.txt	GEO	GDS3113	1.22141910872	Homo sapiens	Various normal tissues	tissue	brain	placenta
E-MEXP-3020_33_2_4_mod.txt	ArrayExpress	E-MEXP-3020	1.53163634954	Homo sapiens	Low Dose PDT - Human Cells	Factor.Value..CELL_LINE.	PC3	U87
E-GEOD-24547_47_2_3_mod.txt	ArrayExpress	E-GEOD-24547	8.48141238051	Homo sapiens	Transcriptional pathway signatures for the Aurora inhibitor Danusertib	FactorValue..TISSUE.ORIGIN.	colon	Ovary
E-GEOD-27973_41_3_4_mod.txt	ArrayExpress	E-GEOD-27973	2.76549622148	Homo sapiens	Human airway epithelial responses to rhinovirus infection and cigarette smoke extract alone and in combination	FactorValue..DONOR.	3	4
GDS589_tissue_5_28_mod.txt	GEO	GDS589	1.96610433113	Rattus norvegicus	Multiple normal tissue gene expression across strains	tissue	cerebral cortex	thymus
GDS1490_tissue_28_29_mod.txt	GEO	GDS1490	-1.41640603736	Mus musculus	Neural tissue profiling	tissue	spinal cord	spleen
E-GEOD-7869_29_4_5_mod.txt	ArrayExpress	E-GEOD-7869	2.56543586447	Homo sapiens	Transcription profiling by array of human renal cysts from patients with autosomal dominant polycystic kidney disease	Factor.Value.histology.	normal	small cyst
E-TABM-672_24_3_4_mod.txt	ArrayExpress	E-TABM-672	1.69611284915	Mus musculus	Transcription profiling of mouse embyronic stem cell line CGR8 during the first 10 days of differentiation into embryoid bodies	Factor.Value..Age.	2	3
E-GEOD-32334_31_3_6_mod.txt	ArrayExpress	E-GEOD-32334	-2.49511607457	Mus musculus	Developmental timecourse of mouse ocular lens and whole embryo control	FactorValue..STAGE.	E11.5	E13.5
E-TABM-717_24_2_4_mod.txt	ArrayExpress	E-TABM-717	3.04774746573	Mus musculus	Transcription profiling of mouse embryonic stem cells in vitro - FunGenES: IMM-1: Neural Differentiation of Embryonic Stem Cells in vitro: a Road Map to Neurogenesis in the Embryo	Factor.Value..Age.	1	4
E-GEOD-24207_47_8_16_mod.txt	ArrayExpress	E-GEOD-24207	5.08064283797	Mus musculus	mRNA analysis in different mouse tissues	FactorValue..TISSUE.	insulinoma	pituitary gland
E-GEOD-33199_29_4_10_mod.txt	ArrayExpress	E-GEOD-33199	1.50182035658	Mus musculus	A mouse model of the most aggressive subgroup of human medulloblastoma [Mouse430 2]	FactorValue..VARIATION.	p53-/-, Cdkn2c-/- infected with hcMyc/GFP	Ptc+/-, Cdkn2c-/-
GDS2431_time_2_6_mod.txt	GEO	GDS2431	-5.38174175594	Homo sapiens	Erythroid differentiation in vitro: time course	time	1 d	9 d
GDS3113_tissue_15_24_mod.txt	GEO	GDS3113	2.74340880273	Homo sapiens	Various normal tissues	tissue	pancreas	spinal cord
GDS1381_individual_1_5_mod.txt	GEO	GDS1381	-7.65860860618	Homo sapiens	Carboplatin sensitive and resistant ovarian carcinoma	individual	patient 1	patient 5
GDS2819_individual_19_22_mod.txt	GEO	GDS2819	-2.41321701012	Homo sapiens	Leukemic white blood cells and various RNA preparation protocols	individual	patient 26	patient 4
E-GEOD-19684_37_1_4_mod.txt	ArrayExpress	E-GEOD-19684	1.4361067416	Mus musculus	Transcription profiling by array of mouse granule neuron progenitors overexpressing Gli1	Factor.Value..GENOTYPE.	Atoh1 overexpression	Math1-ER overexpression
E-MEXP-3444_36_3_5_mod.txt	ArrayExpress	E-MEXP-3444	-1.58751709684	Mus musculus	Transcriptional profiling by array of mouse cerebellar cortex during postnatal development	Factor.Value.AGE.	5	10
E-GEOD-24207_47_12_19_mod.txt	ArrayExpress	E-GEOD-24207	-1.01080189385	Mus musculus	mRNA analysis in different mouse tissues	FactorValue..TISSUE.	muscle	seminal vesicle
E-GEOD-18552_60_5_12_mod.txt	ArrayExpress	E-GEOD-18552	2.18670213067	Homo sapiens	CDK inhibitors and flavopiridol profiling on A2780 and MCF7 cells	FactorValue..TREATMENT.	CDk-509	Untreated
GDS1490_tissue_19_29_mod.txt	GEO	GDS1490	-1.08238466774	Mus musculus	Neural tissue profiling	tissue	midbrain and diencephalon	spleen
GDS3491_cell.type_1_2_mod.txt	GEO	GDS3491	-2.6241720706	Mus musculus	Aire ectopic expression effect on pancreatic islet beta cells	cell.type	medullary epithelial cell	pancreatic beta cell
E-GEOD-24547_44_3_5_mod.txt	ArrayExpress	E-GEOD-24547	1.34148716981	Homo sapiens	Transcriptional pathway signatures for the Aurora inhibitor Danusertib	FactorValue..CELL.LINE.	HCT-116	MDA-MB-468
E-GEOD-24207_47_10_12_mod.txt	ArrayExpress	E-GEOD-24207	3.72124307731	Mus musculus	mRNA analysis in different mouse tissues	FactorValue..TISSUE.	liver	muscle
GDS3442_age_1_3_mod.txt	GEO	GDS3442	-1.14507758282	Mus musculus	Embryonic brain development	age	E11.5	E9.5
GDS1054_age_2_3_mod.txt	GEO	GDS1054	-1.78497831217	Rattus norvegicus	Iron deficiency effect on duodenum: time course (RAE230A)	age	21 d	36 wk
E-GEOD-24207_47_9_13_mod.txt	ArrayExpress	E-GEOD-24207	4.1891763765	Mus musculus	mRNA analysis in different mouse tissues	FactorValue..TISSUE.	kidney	ovary
GDS3113_tissue_15_19_mod.txt	GEO	GDS3113	3.74922475581	Homo sapiens	Various normal tissues	tissue	pancreas	retina
E-GEOD-24207_47_6_19_mod.txt	ArrayExpress	E-GEOD-24207	-2.2256738053	Mus musculus	mRNA analysis in different mouse tissues	FactorValue..TISSUE.	eye	seminal vesicle
E-GEOD-14897_25_1_2_mod.txt	ArrayExpress	E-GEOD-14897	-2.11004055157	Homo sapiens	Transcription profiling by array of human hepatic cells derived from foreskin fibroblast cells or embryonic stem cells	FactorValue.cell.type.	fibroblast	fibroblast post hepatic differentiation
E-GEOD-24210_45_2_3_mod.txt	ArrayExpress	E-GEOD-24210	-1.70614467579	Mus musculus	Interleukin-35-mediated induction of a novel regulatory T cell population	FactorValue..CELL.TYPE.	CD4+/CD45RBhi/CD25- T conventional cells	CD4+/CD45RBlow regulatory T cells (Tregs)
E-GEOD-24207_47_1_12_mod.txt	ArrayExpress	E-GEOD-24207	-2.37319483443	Mus musculus	mRNA analysis in different mouse tissues	FactorValue..TISSUE.	adipose tissue	muscle
E-GEOD-27987_35_1_4_mod.txt	ArrayExpress	E-GEOD-27987	2.02184462606	Mus musculus	Differential pre-mRNA processing in Crebbp+/- mice	FactorValue..CELL.TYPE.	Cdkn1a-/- FLHSC	Crebbp+/- MEF
GDS3150_cell.type_1_2_mod.txt	GEO	GDS3150	-3.73458708475	Rattus norvegicus	Renal inner medullary collecting duct cells	cell.type	control	inner medullary collecting duct cell
E-TABM-672_24_1_2_mod.txt	ArrayExpress	E-TABM-672	1.12370205494	Mus musculus	Transcription profiling of mouse embyronic stem cell line CGR8 during the first 10 days of differentiation into embryoid bodies	Factor.Value..Age.	0	1
GDS1995_protocol_1_2_mod.txt	GEO	GDS1995	-2.02716581451	Rattus norvegicus	Age effect on healing femoral fractures: time course	protocol	fracture	no fracture
GDS3113_tissue_17_18_mod.txt	GEO	GDS3113	-1.48513235038	Homo sapiens	Various normal tissues	tissue	placenta	prostate
GDS3142_tissue_11_12_mod.txt	GEO	GDS3142	4.03288272676	Mus musculus	Various tissues	tissue	liver	lung
GDS2106_genotype_variation_5_18_mod.txt	GEO	GDS2106	2.18988778676	Homo sapiens	Lymphoblastoid cell lines from various CEPH pedigrees	genotype_variation	CEPH pedigree 1345	CEPH pedigree 1454
E-GEOD-25098_32_3_7_mod.txt	ArrayExpress	E-GEOD-25098	-2.2435029105	Mus musculus	Rhabdomyosarcoma can be initiated in activated Pax7+ Muscle Progenitor Cells	FactorValue..GENOTYPE.VARIATION.	Pax7-CreER/+; LSL-KrasG12D;Trp53Flox/Flox	Wild Type mice
E-GEOD-26866_41_1_4_mod.txt	ArrayExpress	E-GEOD-26866	4.63114760093	Homo sapiens	Combined Use of Laser Capture Microdissection and Microarray Analysis Identifies Locally Expressed Disease-Related Genes in Focal Regions of Psoriasis Vulgaris Skin Lesions	FactorValue..REGION.	EPI (epidermis)	RD (reticular dermis)
E-GEOD-28598_47_1_3_mod.txt	ArrayExpress	E-GEOD-28598	-1.98054564945	Mus musculus	Protection from obesity and diabetes by blockade of TGF-beta/Smad3 signaling	FactorValue..TREATMENT.	diet induced obese	regular diet
GDS589_tissue_4_12_mod.txt	GEO	GDS589	1.16247003716	Rattus norvegicus	Multiple normal tissue gene expression across strains	tissue	cerebellum	heart
E-GEOD-18649_35_1_3_mod.txt	ArrayExpress	E-GEOD-18649	-2.59614251491	Mus musculus	Molecular Profiling of the Developing Axial Skeleton: A role for Tgfbr2 in the Development of the Intervertebral Disc.	FactorValue..AGENT.	BMP	not specified
E-GEOD-15129_32_1_2_mod.txt	ArrayExpress	E-GEOD-15129	-1.2201111314	Mus musculus	Coenzyme Q10-dependent gene expression in SAMP1 mice tissues	Factor.Value..AGE.	14 months	6 months
E-GEOD-24207_47_9_19_mod.txt	ArrayExpress	E-GEOD-24207	2.29177170307	Mus musculus	mRNA analysis in different mouse tissues	FactorValue..TISSUE.	kidney	seminal vesicle
E-GEOD-14580_40_1_2_mod.txt	ArrayExpress	E-GEOD-14580	1.93684301657	Homo sapiens	Mucosal gene signatures to predict response to infliximab in patients with ulcerative colitis	FactorValue..DISEASE.	control	UC
E-GEOD-27546_37_1_3_mod.txt	ArrayExpress	E-GEOD-27546	10.2663105575	Mus musculus	Effects of HMGN variants on cellular transcription profile	FactorValue..CELL.TYPE.	MIN6 cells	SV40 transformed MEFs
GDS3113_tissue_14_20_mod.txt	GEO	GDS3113	-3.04590243713	Homo sapiens	Various normal tissues	tissue	ovary	salivary gland
E-GEOD-21278_33_1_10_mod.txt	ArrayExpress	E-GEOD-21278	-1.78111799621	Mus musculus	A genomic atlas of mouse hypothalamic development	Factor.Value..AGE.	embryonic day 10	postnatal day 0
E-TABM-669_25_4_7_mod.txt	ArrayExpress	E-TABM-669	2.97844312103	Mus musculus	Transcription profiling of mouse embryonic stem cell line Sox1Tv2 during neuronal differentiation	Factor.Value..Age.d..	E14+3 days	E14+8 days
E-GEOD-21718_32_1_2_mod.txt	ArrayExpress	E-GEOD-21718	2.28719782214	Mus musculus	Developmental influence of the cellular prion protein on the gene expression profile in mouse hippocampus	FactorValue..DEVELOPMENTAL.STAGE.	adult (3-month-old)	newborn (4-day-old)
GDS3142_tissue_11_13_mod.txt	GEO	GDS3142	2.97298196207	Mus musculus	Various tissues	tissue	liver	muscle
GDS3142_tissue_6_11_mod.txt	GEO	GDS3142	-2.53049610194	Mus musculus	Various tissues	tissue	embryonic stem cells	liver
E-GEOD-13873_35_3_4_mod.txt	ArrayExpress	E-GEOD-13873	6.74053402141	Mus musculus	Expression data from murine gastric epithelium	FactorValue..PATHOLOGY.	metaplasia	n/a
E-GEOD-24207_47_15_21_mod.txt	ArrayExpress	E-GEOD-24207	4.02785909936	Mus musculus	mRNA analysis in different mouse tissues	FactorValue..TISSUE.	pancreatic islets	spleen
E-GEOD-24207_47_5_6_mod.txt	ArrayExpress	E-GEOD-24207	1.42268833868	Mus musculus	mRNA analysis in different mouse tissues	FactorValue..TISSUE.	diaphragm	eye
GDS3142_tissue_8_16_mod.txt	GEO	GDS3142	-1.52960617239	Mus musculus	Various tissues	tissue	fetus	placenta
E-GEOD-18281_36_5_6_mod.txt	ArrayExpress	E-GEOD-18281	3.09499865119	Mus musculus	Spatial mapping of thymic stromal microenvironments reveals unique features influencing T lymphoid differentiation	FactorValue..TISSUE.	Whole cortex	Whole medulla
E-GEOD-22903_31_2_4_mod.txt	ArrayExpress	E-GEOD-22903	-3.0881012512	Mus musculus	Ribosomal deficiencies in Diamond-Blackfan anemia impair translation of transcripts essential for differentiation of murine and human erythroblasts	FactorValue..SHRNA.	rpl11	sc
E-GEOD-23583_51_2_5_mod.txt	ArrayExpress	E-GEOD-23583	-2.18519874392	Homo sapiens	Highly efficient reprogramming to pluripotency and directed differentiation using synthetic mRNA	FactorValue..REPROGRAMMING.PROTOCOL.	n/a	viral derived iPS
GDS3113_tissue_13_15_mod.txt	GEO	GDS3113	-2.45752974719	Homo sapiens	Various normal tissues	tissue	mammary gland	pancreas
E-GEOD-24207_47_6_10_mod.txt	ArrayExpress	E-GEOD-24207	-4.55581443621	Mus musculus	mRNA analysis in different mouse tissues	FactorValue..TISSUE.	eye	liver
GDS3113_tissue_19_29_mod.txt	GEO	GDS3113	-1.9533443985	Homo sapiens	Various normal tissues	tissue	retina	tonsil
E-GEOD-24207_47_1_2_mod.txt	ArrayExpress	E-GEOD-24207	-3.91933436938	Mus musculus	mRNA analysis in different mouse tissues	FactorValue..TISSUE.	adipose tissue	adrenal gland
E-GEOD-31082_36_1_3_mod.txt	ArrayExpress	E-GEOD-31082	2.68504355915	Mus musculus	Gene expression analysis of thymocyte subsets	FactorValue..CELL.TYPE.	CD4-CD8-TCRb- thymocytes	CD4+CD8-TCRb(hi) thymocytes
E-GEOD-28417_36_2_4_mod.txt	ArrayExpress	E-GEOD-28417	3.49293017239	Mus musculus	Expression data from mouse tissues	FactorValue..ORGANISM.PART.	liver	thymus
GDS2671_time_3_9_mod.txt	GEO	GDS2671	-2.62224380506	Mus musculus	Embryonic V6.5 stem cell differentiation in vitro (MG-430A)	time	14 d	6 h
GDS3142_tissue_2_22_mod.txt	GEO	GDS3142	1.74895294709	Mus musculus	Various tissues	tissue	adrenal gland	thymus
E-GEOD-22373_26_1_2_mod.txt	ArrayExpress	E-GEOD-22373	7.99965233025	Homo sapiens	Monocyte vs Macrophage Study	Factor.Value..CELL.TYPE.	Macrophage	Monocyte
E-GEOD-14580_39_1_2_mod.txt	ArrayExpress	E-GEOD-14580	-1.93684301657	Homo sapiens	Mucosal gene signatures to predict response to infliximab in patients with ulcerative colitis	FactorValue..BEFORE.OR.AFTER.FIRST.INFLIXIMAB.TREATMENT.	Before first infliximab treatment	Not applicable
E-GEOD-21419_36_2_4_mod.txt	ArrayExpress	E-GEOD-21419	1.56136272085	Mus musculus	Laser Capture Microdissection of Hyperlipidemic Mouse Aorta Atherosclerosis	FactorValue..ORGANISM.PART.	adventitia of abdominal aorta outside of atherosclerotic lesion area	atherosclerotic lesion of abdominal aorta
E-GEOD-30122_44_1_3_mod.txt	ArrayExpress	E-GEOD-30122	-3.59473755649	Homo sapiens	Transcriptome Analysis of Human Diabetic Kidney Disease	FactorValue..TISSUE.SUBREGION.	glomerulus	tubulus
E-TABM-1091_29_1_6_mod.txt	ArrayExpress	E-TABM-1091	2.3536785416	Homo sapiens	Transcriptiion profiling by array of human ratiometric mixes of high quality RNA from different tissues using different labeling protocols to provide a mechanism for assessing process improvement	Factor.Value..MIX.	Human Brain Reference RNA	Universal Human Reference RNA
E-GEOD-26408_35_1_3_mod.txt	ArrayExpress	E-GEOD-26408	2.98701043946	Mus musculus	Signatures of murine B-cell development implicate Yy1 as a regulator of the germinal center-specific program	FactorValue..ORGANISM.PART.	bone marrow	Tumor
E-MEXP-1649_37_3_6_mod.txt	ArrayExpress	E-MEXP-1649	2.29423576741	Mus musculus	Transcription profiling of mouse liver cells with liver specific deletion of Irs1 and/or Irs2 and Foxo1during fasting and feeding	Factor.Value..GENOTYPE.	Irs1 L/L::Irs2 L/L::Foxo1 L/L	Liver Specific Irs1 -/-::Irs2 -/-
E-GEOD-13093_28_2_8_mod.txt	ArrayExpress	E-GEOD-13093	-2.12724676961	Mus musculus	Feeding schedule and the circadian clock shape rhythms in hepatic gene expression	FactorValue..STRAIN.OR.LINE.	C57/B6, Gender: male, Age: 8-12 weeks, Condition: Fasted	Cry1,Cry2 double KO, Gender: male, Age: 8-16 weeks, Condition: temporally restricted food availability CT1(25)-CT9(33)
GDS3113_tissue_3_15_mod.txt	GEO	GDS3113	-1.74126691921	Homo sapiens	Various normal tissues	tissue	brain	pancreas
GDS598_time_5_9_mod.txt	GEO	GDS598	1.02975641453	Rattus norvegicus	Cardiac hypertrophy: comparison of various induction models	time	3 w	NA
GDS2055_individual_2_6_mod.txt	GEO	GDS2055	-1.66762990601	Homo sapiens	Skeletal muscle types (HG-U133A)	individual	2	6
E-GEOD-26408_33_5_7_mod.txt	ArrayExpress	E-GEOD-26408	5.452551026	Mus musculus	Signatures of murine B-cell development implicate Yy1 as a regulator of the germinal center-specific program	FactorValue..CELL.TYPE.	Purified Plasma cells (B220-low/Cd138-positive/Cd93-negative)	Purified Pre-B (B220-positive/CD43-low/IgM-negative) B-cells
E-GEOD-23583_50_1_6_mod.txt	ArrayExpress	E-GEOD-23583	-1.49788564009	Homo sapiens	Highly efficient reprogramming to pluripotency and directed differentiation using synthetic mRNA	FactorValue..CELL.TYPE.	BJ fibroblast	iPS cells derived from dH1F fibroblast
GDS3516_disease.state_1_6_mod.txt	GEO	GDS3516	-1.49201920965	Homo sapiens	Nodular lymphocyte-predominant Hodgkin lymphoma: lymphocytic and histiocytic cells	disease.state	Burkitt lymphoma	normal centroblasts
GDS2819_individual_2_18_mod.txt	GEO	GDS2819	-2.84621997352	Homo sapiens	Leukemic white blood cells and various RNA preparation protocols	individual	patient 10	patient 25
GDS2813_tissue_1_2_mod.txt	GEO	GDS2813	2.19663180653	Mus musculus	Brown and white adipose tissues	tissue	brown adipose	white adipose
E-TABM-669_25_1_2_mod.txt	ArrayExpress	E-TABM-669	3.91797085164	Mus musculus	Transcription profiling of mouse embryonic stem cell line Sox1Tv2 during neuronal differentiation	Factor.Value..Age.d..	E14+0 days	E14+10 days
GDS3142_tissue_5_12_mod.txt	GEO	GDS3142	1.57086586784	Mus musculus	Various tissues	tissue	diaphragm	lung
E-GEOD-28887_39_2_3_mod.txt	ArrayExpress	E-GEOD-28887	-1.1642410476	Mus musculus	Gene expression profile of Age associated B cells	FactorValue..CELL.TYPE.	B1 cells	Follicular B cells
GDS2819_individual_9_19_mod.txt	GEO	GDS2819	2.21743709899	Homo sapiens	Leukemic white blood cells and various RNA preparation protocols	individual	patient 17	patient 26
GDS3113_tissue_3_20_mod.txt	GEO	GDS3113	-1.25466834173	Homo sapiens	Various normal tissues	tissue	brain	salivary gland
E-GEOD-24207_47_13_18_mod.txt	ArrayExpress	E-GEOD-24207	-3.1807627913	Mus musculus	mRNA analysis in different mouse tissues	FactorValue..TISSUE.	ovary	salivary gland
E-GEOD-26866_41_1_3_mod.txt	ArrayExpress	E-GEOD-26866	4.44200730797	Homo sapiens	Combined Use of Laser Capture Microdissection and Microarray Analysis Identifies Locally Expressed Disease-Related Genes in Focal Regions of Psoriasis Vulgaris Skin Lesions	FactorValue..REGION.	EPI (epidermis)	PD (papillary dermis)
E-TABM-1027_34_1_2_mod.txt	ArrayExpress	E-TABM-1027	1.39778972159	Mus musculus	Transcription profiling of mouse embryonic stem cell line D3 differentiation cultures treated by different concentrations of flusilazole.	Factor.Value..TIME.	0	24
E-GEOD-22798_35_1_4_mod.txt	ArrayExpress	E-GEOD-22798	2.72113140535	Mus musculus	Expression data from Pax7+ satellite cell derived tumors in vitro and in vivo	FactorValue..GENOTYPE.	littermate control	R26-Cre-ERT2;LSL-KrasG12D/+;Trp53Fl/Fl
E-GEOD-27987_35_6_7_mod.txt	ArrayExpress	E-GEOD-27987	-2.21056067532	Mus musculus	Differential pre-mRNA processing in Crebbp+/- mice	FactorValue..CELL.TYPE.	Crebbp+/+ MEF	Ep300+/- FLHSC
GDS3113_tissue_4_24_mod.txt	GEO	GDS3113	1.57210310282	Homo sapiens	Various normal tissues	tissue	colon	spinal cord
E-MEXP-1649_37_1_6_mod.txt	ArrayExpress	E-MEXP-1649	2.33150591026	Mus musculus	Transcription profiling of mouse liver cells with liver specific deletion of Irs1 and/or Irs2 and Foxo1during fasting and feeding	Factor.Value..GENOTYPE.	Irs1 L/L	Liver Specific Irs1 -/-::Irs2 -/-
E-TABM-672_24_3_7_mod.txt	ArrayExpress	E-TABM-672	4.16154658949	Mus musculus	Transcription profiling of mouse embyronic stem cell line CGR8 during the first 10 days of differentiation into embryoid bodies	Factor.Value..Age.	2	6
E-GEOD-30747_49_1_3_mod.txt	ArrayExpress	E-GEOD-30747	2.10546094971	Mus musculus	AML mouse models	FactorValue..KNOCKDOWN.	empty vector	not specified
GDS3113_tissue_5_6_mod.txt	GEO	GDS3113	1.07054169774	Homo sapiens	Various normal tissues	tissue	fetal brain	fetal kidney
E-GEOD-24207_47_7_19_mod.txt	ArrayExpress	E-GEOD-24207	-1.3437398335	Mus musculus	mRNA analysis in different mouse tissues	FactorValue..TISSUE.	heart	seminal vesicle
E-GEOD-24207_47_3_19_mod.txt	ArrayExpress	E-GEOD-24207	-2.37564033226	Mus musculus	mRNA analysis in different mouse tissues	FactorValue..TISSUE.	bone marrow	seminal vesicle
GDS3113_tissue_5_13_mod.txt	GEO	GDS3113	1.33789441907	Homo sapiens	Various normal tissues	tissue	fetal brain	mammary gland
E-GEOD-29618_37_1_3_mod.txt	ArrayExpress	E-GEOD-29618	2.19955280278	Homo sapiens	FACS-sorted cells from Young Adults Vaccinated with Influenza TIV or LAIV Vaccines during 2008/09 Flu Season	FactorValue..CELL.TYPE.	Bcells	Monocytes
E-GEOD-15129_29_2_3_mod.txt	ArrayExpress	E-GEOD-15129	-2.00792267672	Mus musculus	Coenzyme Q10-dependent gene expression in SAMP1 mice tissues	Factor.Value..TISSUE.	heart	kidney
GDS3113_tissue_6_15_mod.txt	GEO	GDS3113	-2.19017702586	Homo sapiens	Various normal tissues	tissue	fetal kidney	pancreas
GDS2819_individual_3_18_mod.txt	GEO	GDS2819	1.28737806639	Homo sapiens	Leukemic white blood cells and various RNA preparation protocols	individual	patient 11	patient 25
GDS3142_tissue_3_5_mod.txt	GEO	GDS3142	-1.22361574048	Mus musculus	Various tissues	tissue	bone marrow	diaphragm
E-GEOD-24547_44_1_4_mod.txt	ArrayExpress	E-GEOD-24547	-7.01779082405	Homo sapiens	Transcriptional pathway signatures for the Aurora inhibitor Danusertib	FactorValue..CELL.LINE.	A2780	MCF7
GDS2159_time_2_6_mod.txt	GEO	GDS2159	2.27232014773	Mus musculus	Spinal cord injury model: time course	time	0 h	72 h
E-GEOD-13873_34_2_3_mod.txt	ArrayExpress	E-GEOD-13873	-7.26094470902	Mus musculus	Expression data from murine gastric epithelium	FactorValue..INFECTION.	n/a	uninfected
E-GEOD-24207_47_2_19_mod.txt	ArrayExpress	E-GEOD-24207	1.37183896751	Mus musculus	mRNA analysis in different mouse tissues	FactorValue..TISSUE.	adrenal gland	seminal vesicle
E-GEOD-21278_33_3_8_mod.txt	ArrayExpress	E-GEOD-21278	-1.69331630296	Mus musculus	A genomic atlas of mouse hypothalamic development	Factor.Value..AGE.	embryonic day 12	embryonic day 17
E-GEOD-24637_42_1_4_mod.txt	ArrayExpress	E-GEOD-24637	-7.21781473383	Mus musculus	Genetic and genomic analysis of hyperlipidemia	FactorValue..TISSUE.	Adipose	pancreas
E-GEOD-22139_37_2_4_mod.txt	ArrayExpress	E-GEOD-22139	2.37343679569	Homo sapiens	Bone morphogenetic protein-7 is a MYC target with pro-survival functions in childhood medulloblastoma	FactorValue..GENETIC.MODIFICATION.	pEGFP vector-transfected	siRNA cMYC silenced
GDS1490_tissue_2_26_mod.txt	GEO	GDS1490	1.04380790782	Mus musculus	Neural tissue profiling	tissue	amygdala	retina
GDS181_tissue_13_20_mod.txt	GEO	GDS181	4.62712396777	Homo sapiens	Large-scale analysis of the human transcriptome (HG-U95A)	tissue	HL60	ovary-pool
E-GEOD-27546_37_1_2_mod.txt	ArrayExpress	E-GEOD-27546	10.5592824072	Mus musculus	Effects of HMGN variants on cellular transcription profile	FactorValue..CELL.TYPE.	MIN6 cells	primary MEFs
E-TABM-1091_29_4_6_mod.txt	ArrayExpress	E-TABM-1091	1.13106988999	Homo sapiens	Transcriptiion profiling by array of human ratiometric mixes of high quality RNA from different tissues using different labeling protocols to provide a mechanism for assessing process improvement	Factor.Value..MIX.	Mix2	Universal Human Reference RNA
E-GEOD-27987_35_5_6_mod.txt	ArrayExpress	E-GEOD-27987	2.64940716529	Mus musculus	Differential pre-mRNA processing in Crebbp+/- mice	FactorValue..CELL.TYPE.	Crebbp+/+ FLHSC	Crebbp+/+ MEF
E-GEOD-24547_44_1_5_mod.txt	ArrayExpress	E-GEOD-24547	-6.53538131835	Homo sapiens	Transcriptional pathway signatures for the Aurora inhibitor Danusertib	FactorValue..CELL.LINE.	A2780	MDA-MB-468
GDS3142_tissue_1_3_mod.txt	GEO	GDS3142	-1.61584084468	Mus musculus	Various tissues	tissue	adipose tissue	bone marrow
E-GEOD-22903_31_1_2_mod.txt	ArrayExpress	E-GEOD-22903	2.87562456808	Mus musculus	Ribosomal deficiencies in Diamond-Blackfan anemia impair translation of transcripts essential for differentiation of murine and human erythroblasts	FactorValue..SHRNA.	none	rpl11
E-GEOD-24207_47_8_10_mod.txt	ArrayExpress	E-GEOD-24207	4.50450259308	Mus musculus	mRNA analysis in different mouse tissues	FactorValue..TISSUE.	insulinoma	liver
GDS2718_cell.type_1_2_mod.txt	GEO	GDS2718	-2.46114889263	Mus musculus	Transcription factor Zfx deficiency effect on embryonic and hematopoietic stem cells	cell.type	embryonic stem cell	hematopoietic stem cell
GDS1479_specimen_2_5_mod.txt	GEO	GDS1479	-1.49969027366	Homo sapiens	Carcinoma in situ lesions of the urinary bladder	specimen	muscle invasive carcinoma	superficial transitional cell carcinoma w/o surrounding carcinoma in situ (CIS) lesion
E-GEOD-31082_36_1_2_mod.txt	ArrayExpress	E-GEOD-31082	2.67251167543	Mus musculus	Gene expression analysis of thymocyte subsets	FactorValue..CELL.TYPE.	CD4-CD8-TCRb- thymocytes	CD4-CD8+TCRb(hi) thymocytes
GDS181_tissue_26_34_mod.txt	GEO	GDS181	1.80151205811	Homo sapiens	Large-scale analysis of the human transcriptome (HG-U95A)	tissue	prostate cancer	THY+
E-MEXP-3282_31_1_2_mod.txt	ArrayExpress	E-MEXP-3282	-1.28736633319	Mus musculus	Transcription profiling by array of ApoE3Leiden mice exposed to high doses of cholesterol and rosuvastatin	Factor.Value.Dose.	0.01	0.03
GDS181_tissue_13_15_mod.txt	GEO	GDS181	2.54506325192	Homo sapiens	Large-scale analysis of the human transcriptome (HG-U95A)	tissue	HL60	kidney
E-GEOD-15904_24_2_8_mod.txt	ArrayExpress	E-GEOD-15904	-2.01827513762	Mus musculus	Transcription profiling by array of mouse mammary tumors	Factor.Value..HISTOLOGICAL.SUBTYPE.	EMT	Squamous
E-GEOD-20033_27_4_7_mod.txt	ArrayExpress	E-GEOD-20033	1.3874075719	Homo sapiens	Minicircle-derived iPS cells - Affymetrix Data	Factor.Value..CELL.TYPE.	iPSC derived from hASC using lentiviral reprogramming vector	iPS cells from episomal vectors (Defined Factor sub-clone)
E-TABM-672_24_1_4_mod.txt	ArrayExpress	E-TABM-672	2.46695620167	Mus musculus	Transcription profiling of mouse embyronic stem cell line CGR8 during the first 10 days of differentiation into embryoid bodies	Factor.Value..Age.	0	3
E-GEOD-20124_28_1_2_mod.txt	ArrayExpress	E-GEOD-20124	-1.32386808427	Homo sapiens	Transcriptome analysis of human Whartons jelly stem cells: in-house analysis	FactorValue..CELL.TYPE.	embryonic carcinoma cell line	embryonic stem cell line
GDS3142_tissue_12_15_mod.txt	GEO	GDS3142	-3.5268743156	Mus musculus	Various tissues	tissue	lung	pituitary gland
E-GEOD-24207_47_1_9_mod.txt	ArrayExpress	E-GEOD-24207	-4.7241548504	Mus musculus	mRNA analysis in different mouse tissues	FactorValue..TISSUE.	adipose tissue	kidney
E-GEOD-17728_33_1_2_mod.txt	ArrayExpress	E-GEOD-17728	2.26464130157	Mus musculus	Blood gene expression profile from mouse C57Bl/10 exposed to chronic hypoxia	FactorValue..PROTOCOL.	exposed to chronic hypoxia during two weeks	exposed to chronic hypoxia during two weeks followed by two weeks under normoxia
GDS3516_disease.state_2_7_mod.txt	GEO	GDS3516	-2.71836046873	Homo sapiens	Nodular lymphocyte-predominant Hodgkin lymphoma: lymphocytic and histiocytic cells	disease.state	classical Hodgkin lymphoma	normal centrocytes
E-GEOD-32334_31_4_6_mod.txt	ArrayExpress	E-GEOD-32334	-1.20286032667	Mus musculus	Developmental timecourse of mouse ocular lens and whole embryo control	FactorValue..STAGE.	E11.5-13.5	E13.5
E-GEOD-24207_47_4_7_mod.txt	ArrayExpress	E-GEOD-24207	2.56636037165	Mus musculus	mRNA analysis in different mouse tissues	FactorValue..TISSUE.	brain	heart
GDS3113_tissue_2_19_mod.txt	GEO	GDS3113	1.12246624887	Homo sapiens	Various normal tissues	tissue	bone marrow	retina
GDS1663_tissue_1_4_mod.txt	GEO	GDS1663	1.03963679251	Homo sapiens	Expression data from different research centers	tissue	kidney	universal RNA
E-GEOD-22798_35_1_3_mod.txt	ArrayExpress	E-GEOD-22798	3.02330455697	Mus musculus	Expression data from Pax7+ satellite cell derived tumors in vitro and in vivo	FactorValue..GENOTYPE.	littermate control	Pax7CE/+;LSL-KrasG12D/+;Trp53Fl/Fl
E-GEOD-35766_32_1_2_mod.txt	ArrayExpress	E-GEOD-35766	2.25840869724	Mus musculus	Identification of the cortical neurons that mediate antidepressant responses	FactorValue..LINE.	DU9	ES691
GDS3142_tissue_13_15_mod.txt	GEO	GDS3142	-2.66180268518	Mus musculus	Various tissues	tissue	muscle	pituitary gland
GDS3113_tissue_4_22_mod.txt	GEO	GDS3113	1.9873790651	Homo sapiens	Various normal tissues	tissue	colon	skin
GDS3142_tissue_16_18_mod.txt	GEO	GDS3142	-1.5362248187	Mus musculus	Various tissues	tissue	placenta	seminal vesicle
GDS3142_tissue_1_18_mod.txt	GEO	GDS3142	-3.46130993809	Mus musculus	Various tissues	tissue	adipose tissue	seminal vesicle
E-GEOD-24207_47_10_21_mod.txt	ArrayExpress	E-GEOD-24207	4.18596921298	Mus musculus	mRNA analysis in different mouse tissues	FactorValue..TISSUE.	liver	spleen
E-GEOD-24886_40_1_2_mod.txt	ArrayExpress	E-GEOD-24886	5.26109732161	Mus musculus	Exosomes mediate protective messages during oxidative stress; role of exosomal shuttle RNA	FactorValue..CELL.TYPE.	Exosomes	MC/9
E-GEOD-34126_41_1_3_mod.txt	ArrayExpress	E-GEOD-34126	-1.96035576151	Mus musculus	An Animal Model of Myc-driven medulloblastoma	FactorValue..CELL.SOURCE.	normal (uninfected) cerebellar stem cells	progenitor-derived tumors
GDS3113_tissue_10_14_mod.txt	GEO	GDS3113	2.30813943737	Homo sapiens	Various normal tissues	tissue	kidney	ovary
GDS3113_tissue_2_23_mod.txt	GEO	GDS3113	-1.14815571066	Homo sapiens	Various normal tissues	tissue	bone marrow	small intestine
GDS63_time_2_4_mod.txt	GEO	GDS63	1.16668117147	Rattus norvegicus	Spinal cord injury and regeneration time course: at T9 (RG-U34A)	time	0.5 h	14 d
GDS2819_individual_17_26_mod.txt	GEO	GDS2819	3.46797162994	Homo sapiens	Leukemic white blood cells and various RNA preparation protocols	individual	patient 24	patient 8
GDS1608_tissue_4_6_mod.txt	GEO	GDS1608	1.75273549082	Rattus norvegicus	Cocaine addiction effect on reward-related brain regions	tissue	nucleus accumbens	ventral tegmental area
E-TABM-1125_27_3_4_mod.txt	ArrayExpress	E-TABM-1125	2.35168813599	Mus musculus	Transcription profiling of mouse CD31(+) cells isolated from embryonic stem cells	Factor.Value..CELLTYPE.	embryonic stem cell	endothelial cells
E-GEOD-24207_47_7_11_mod.txt	ArrayExpress	E-GEOD-24207	1.48136437948	Mus musculus	mRNA analysis in different mouse tissues	FactorValue..TISSUE.	heart	lung
GDS3516_disease.state_9_11_mod.txt	GEO	GDS3516	1.75455339114	Homo sapiens	Nodular lymphocyte-predominant Hodgkin lymphoma: lymphocytic and histiocytic cells	disease.state	normal naive B-cells	T-cell rich B-cell lymphoma
E-GEOD-24207_47_3_7_mod.txt	ArrayExpress	E-GEOD-24207	-1.03190049876	Mus musculus	mRNA analysis in different mouse tissues	FactorValue..TISSUE.	bone marrow	heart
E-GEOD-29328_32_1_2_mod.txt	ArrayExpress	E-GEOD-29328	3.46753422859	Mus musculus	Expression data from squamous cell carcinoma stem cells	FactorValue..GENOTYPE.	K14cre;FAK(fl/fl)	K14cre;TbRII(fl/fl)
E-GEOD-26408_33_5_9_mod.txt	ArrayExpress	E-GEOD-26408	5.20497006438	Mus musculus	Signatures of murine B-cell development implicate Yy1 as a regulator of the germinal center-specific program	FactorValue..CELL.TYPE.	Purified Plasma cells (B220-low/Cd138-positive/Cd93-negative)	Purified Transitional (B220-positive/Cd93-positive) B-cells
E-GEOD-24207_47_3_15_mod.txt	ArrayExpress	E-GEOD-24207	-4.52357760559	Mus musculus	mRNA analysis in different mouse tissues	FactorValue..TISSUE.	bone marrow	pancreatic islets
E-GEOD-17906_35_1_4_mod.txt	ArrayExpress	E-GEOD-17906	4.15861552037	Homo sapiens	Transcription profiling by array of human CD90 positive prostate stromal fibromuscular tumor cells	Factor.Value.cell.type.		CD49a positive
GDS3516_disease.state_4_9_mod.txt	GEO	GDS3516	-1.87318527333	Homo sapiens	Nodular lymphocyte-predominant Hodgkin lymphoma: lymphocytic and histiocytic cells	disease.state	follicular lymphoma	normal naive B-cells
GDS3113_tissue_11_18_mod.txt	GEO	GDS3113	1.70748781644	Homo sapiens	Various normal tissues	tissue	liver	prostate
GDS3346_infection_1_2_mod.txt	GEO	GDS3346	-1.54354006227	Mus musculus	Helicobacter pylori infection effect on a gastric epithelial progenitor cell line	infection	control	Kx1
GDS3142_tissue_5_15_mod.txt	GEO	GDS3142	-2.28825305118	Mus musculus	Various tissues	tissue	diaphragm	pituitary gland
GDS3113_tissue_7_28_mod.txt	GEO	GDS3113	2.68071460997	Homo sapiens	Various normal tissues	tissue	fetal liver	thyroid
GDS3142_tissue_12_18_mod.txt	GEO	GDS3142	-2.46133989656	Mus musculus	Various tissues	tissue	lung	seminal vesicle
E-GEOD-15580_38_1_2_mod.txt	ArrayExpress	E-GEOD-15580	-3.18585988217	Mus musculus	Molecular Signatures of Fetal and Adult Prostate Stem Cells	FactorValue..STRAIN.	C57BL	C57BL/6
E-GEOD-20540_29_1_2_mod.txt	ArrayExpress	E-GEOD-20540	-2.72394085924	Homo sapiens	Transcription profiling of human multiple myeloma cells co-cultured with bone marrow stromal cells in vitro	Factor.Value.Growth.Condition.	co-culture with human bone marrow stromal cell line HS-5	cultured alone
E-MEXP-3442_31_1_2_mod.txt	ArrayExpress	E-MEXP-3442	-1.95603095262	Mus musculus	Transcription profiling by array of Taf10 KO livers	Factor.Value.GENOTYPE.	Taf10-/-	wild_type
E-GEOD-29848_38_1_6_mod.txt	ArrayExpress	E-GEOD-29848	1.21097829391	Mus musculus	Microarray data of differentiating embryonic stem cells overexpressing the transcription factor Msgn1	FactorValue..TREATMENT.	Day2 EBs cultured for another 12h	Day2 EBs induced with doxycycline and cultured for another 48h
E-GEOD-14479_29_1_2_mod.txt	ArrayExpress	E-GEOD-14479	1.05103885841	Homo sapiens	Transcription profiling by array of human lymphoblasts from patients with acute myeloid lymphoma or T acute lymphoblastic leukemia, mutant for CEBPA	Factor.Value.disease.state.	acute myeloid leukemia	T acute lymphoblastic leukemia
E-GEOD-24207_47_4_20_mod.txt	ArrayExpress	E-GEOD-24207	1.22603411554	Mus musculus	mRNA analysis in different mouse tissues	FactorValue..TISSUE.	brain	small intestine
E-GEOD-24207_47_19_21_mod.txt	ArrayExpress	E-GEOD-24207	1.87992182604	Mus musculus	mRNA analysis in different mouse tissues	FactorValue..TISSUE.	seminal vesicle	spleen
GDS3113_tissue_1_24_mod.txt	GEO	GDS3113	1.45526936273	Homo sapiens	Various normal tissues	tissue	adrenal gland	spinal cord
E-GEOD-20505_25_1_3_mod.txt	ArrayExpress	E-GEOD-20505	-1.04980347229	Homo sapiens	Transcription profilin by array of human CD34+ hematopoietic progenitor cells grown under different conditions	Factor.Value..DONOR.ID.	1	3
E-GEOD-30355_35_1_2_mod.txt	ArrayExpress	E-GEOD-30355	-2.08092201561	Homo sapiens	Human keratinocytes have a response to injury that upregulates CCL20 and other genes linking innate and adaptive immunity	FactorValue..TYPE.	Vitro	Vivo
GDS3113_tissue_20_25_mod.txt	GEO	GDS3113	1.86913413249	Homo sapiens	Various normal tissues	tissue	salivary gland	spleen
GDS3142_tissue_6_10_mod.txt	GEO	GDS3142	-1.95181374653	Mus musculus	Various tissues	tissue	embryonic stem cells	kidney
E-GEOD-20547_29_2_3_mod.txt	ArrayExpress	E-GEOD-20547	-2.00608513746	Mus musculus	A53T-??-synuclein overexpression mouse model signaling and striatal synaptic plasticity	Factor.Value..TISSUE.	cerebellum	striatum
GDS2295_protocol_1_2_mod.txt	GEO	GDS2295	7.75734575645	Homo sapiens	Aplidin and cytarabine effect on diffuse large B cell lymphoma cell line	protocol	in vitro	in vivo
E-GEOD-24207_47_3_11_mod.txt	ArrayExpress	E-GEOD-24207	1.06327241987	Mus musculus	mRNA analysis in different mouse tissues	FactorValue..TISSUE.	bone marrow	lung
E-GEOD-23583_51_2_3_mod.txt	ArrayExpress	E-GEOD-23583	-1.38766950318	Homo sapiens	Highly efficient reprogramming to pluripotency and directed differentiation using synthetic mRNA	FactorValue..REPROGRAMMING.PROTOCOL.	n/a	RNA derived iPS
E-GEOD-34907_29_2_3_mod.txt	ArrayExpress	E-GEOD-34907	1.69420780855	Mus musculus	Genetic and epigenetic determinants of neurogenesis and myogenesis [expression profiling]	FactorValue..CELL.TYPE.	Neuronally differentiated P19 cells	undifferentiated MEF cells
E-TABM-1091_32_2_5_mod.txt	ArrayExpress	E-TABM-1091	-1.42768450845	Homo sapiens	Transcriptiion profiling by array of human ratiometric mixes of high quality RNA from different tissues using different labeling protocols to provide a mechanism for assessing process improvement	Factor.Value..BATCH.	Batch2	Batch5
E-GEOD-21278_33_3_10_mod.txt	ArrayExpress	E-GEOD-21278	-2.53396954553	Mus musculus	A genomic atlas of mouse hypothalamic development	Factor.Value..AGE.	embryonic day 12	postnatal day 0
GDS3142_tissue_8_9_mod.txt	GEO	GDS3142	-1.424889813	Mus musculus	Various tissues	tissue	fetus	heart
E-GEOD-24207_47_1_10_mod.txt	ArrayExpress	E-GEOD-24207	-5.73229967642	Mus musculus	mRNA analysis in different mouse tissues	FactorValue..TISSUE.	adipose tissue	liver
GDS3113_tissue_19_30_mod.txt	GEO	GDS3113	-1.75816030351	Homo sapiens	Various normal tissues	tissue	retina	trachea
GDS3142_tissue_5_10_mod.txt	GEO	GDS3142	-2.16690144527	Mus musculus	Various tissues	tissue	diaphragm	kidney
E-GEOD-26408_33_2_5_mod.txt	ArrayExpress	E-GEOD-26408	-5.42369307828	Mus musculus	Signatures of murine B-cell development implicate Yy1 as a regulator of the germinal center-specific program	FactorValue..CELL.TYPE.	Purified Follicular (Cd19-positive/Cd21-intermediate/Cd23-high) B-cells	Purified Plasma cells (B220-low/Cd138-positive/Cd93-negative)
E-GEOD-21278_33_4_8_mod.txt	ArrayExpress	E-GEOD-21278	-1.40300416074	Mus musculus	A genomic atlas of mouse hypothalamic development	Factor.Value..AGE.	embryonic day 13	embryonic day 17
GDS1381_individual_1_6_mod.txt	GEO	GDS1381	-6.86812337783	Homo sapiens	Carboplatin sensitive and resistant ovarian carcinoma	individual	patient 1	patient 6
GDS3113_tissue_11_14_mod.txt	GEO	GDS3113	3.76243515349	Homo sapiens	Various normal tissues	tissue	liver	ovary
E-GEOD-24207_47_16_21_mod.txt	ArrayExpress	E-GEOD-24207	3.70642585015	Mus musculus	mRNA analysis in different mouse tissues	FactorValue..TISSUE.	pituitary gland	spleen
E-GEOD-21444_35_1_2_mod.txt	ArrayExpress	E-GEOD-21444	-1.12044860605	Mus musculus	Expression profiling of murine DCIS and invasive ductal breast carcinoma	FactorValue..TISSUE.	breast	breast tumor
E-GEOD-27547_35_1_2_mod.txt	ArrayExpress	E-GEOD-27547	1.13520163449	Mus musculus	Gene expression differences in mouse islets after isolation at different time points (0-48hr)	FactorValue..TIME.AFTER.ISOLATION.	0 hr	24 hr
E-GEOD-25014_40_1_2_mod.txt	ArrayExpress	E-GEOD-25014	-1.2661612324	Homo sapiens	Gene expression data of endothelium exposed to heme	FactorValue..TREATMENT.	control	heme
E-GEOD-18269_56_2_3_mod.txt	ArrayExpress	E-GEOD-18269	-4.92749818253	Homo sapiens	HepaRG cells as a model of the primary human hepatocyte transcriptome	FactorValue..DIFFERENTIATION.STATE.	not specified	undifferentiated
E-GEOD-24207_47_21_22_mod.txt	ArrayExpress	E-GEOD-24207	-1.75456450895	Mus musculus	mRNA analysis in different mouse tissues	FactorValue..TISSUE.	spleen	testis
GDS3516_disease.state_5_9_mod.txt	GEO	GDS3516	-2.3775064551	Homo sapiens	Nodular lymphocyte-predominant Hodgkin lymphoma: lymphocytic and histiocytic cells	disease.state	nodular lymphocyte-predominant Hodgkin lymphoma	normal naive B-cells
GDS1381_individual_2_6_mod.txt	GEO	GDS1381	-6.78300285999	Homo sapiens	Carboplatin sensitive and resistant ovarian carcinoma	individual	patient 2	patient 6
GDS3142_tissue_8_15_mod.txt	GEO	GDS3142	-4.07860846777	Mus musculus	Various tissues	tissue	fetus	pituitary gland
GDS3113_tissue_1_28_mod.txt	GEO	GDS3113	1.65519079206	Homo sapiens	Various normal tissues	tissue	adrenal gland	thyroid
E-TABM-1108_31_1_4_mod.txt	ArrayExpress	E-TABM-1108	1.06066753165	Mus musculus	Evaluation of methylmercury on neural development in Embryonic Stem Cell Differentiation Cultures	Factor.Value..TIME.	0	5
GDS3113_tissue_4_11_mod.txt	GEO	GDS3113	-1.4012398388	Homo sapiens	Various normal tissues	tissue	colon	liver
E-TABM-1091_32_4_5_mod.txt	ArrayExpress	E-TABM-1091	-1.07623613247	Homo sapiens	Transcriptiion profiling by array of human ratiometric mixes of high quality RNA from different tissues using different labeling protocols to provide a mechanism for assessing process improvement	Factor.Value..BATCH.	Batch4	Batch5
GDS3113_tissue_1_7_mod.txt	GEO	GDS3113	-1.02552381791	Homo sapiens	Various normal tissues	tissue	adrenal gland	fetal liver
GDS3113_tissue_12_23_mod.txt	GEO	GDS3113	-1.7723032193	Homo sapiens	Various normal tissues	tissue	lung	small intestine
E-GEOD-26076_31_2_3_mod.txt	ArrayExpress	E-GEOD-26076	1.8217012959	Mus musculus	Mouse conjunctival forniceal gene expression during postnatal development and its regulation by Kruppel-like factor 4	FactorValue..DEVELOPMENTAL.STAGE.	Post-natal day 20	Post-natal day 9
E-GEOD-35366_38_3_8_mod.txt	ArrayExpress	E-GEOD-35366	-2.69591890876	Mus musculus	Global developmental gene expression and pathway analysis of normal brain development and mouse models of human neuronal migration defects	FactorValue..GENOTYPE.	mutant Dcx ko/Y	mutant Ndel ko/+ mix background
E-GEOD-32334_30_2_3_mod.txt	ArrayExpress	E-GEOD-32334	1.68704276525	Mus musculus	Developmental timecourse of mouse ocular lens and whole embryo control	FactorValue..ORGANISM.PART.	Tooth germ	Whole embryo
GDS3113_tissue_9_22_mod.txt	GEO	GDS3113	1.23221912691	Homo sapiens	Various normal tissues	tissue	heart	skin
GDS1956_disease.state_5_10_mod.txt	GEO	GDS1956	-1.19390817624	Homo sapiens	Various muscle diseases (HG-U133A)	disease.state	Duchenne muscular dystrophy	juvenile dermatomyositis
E-GEOD-24207_47_13_14_mod.txt	ArrayExpress	E-GEOD-24207	-6.24319711562	Mus musculus	mRNA analysis in different mouse tissues	FactorValue..TISSUE.	ovary	pancreatic acini
E-GEOD-19076_33_2_3_mod.txt	ArrayExpress	E-GEOD-19076	1.49716112583	Mus musculus	Expression data from wild type	FactorValue..GENOTYPE.	Ring1B mutant generated by gene targeting (Leeb et al., 2007)	Ring1B/Eed double mutant ES cell line generated by gene targeting of Ring1B in Eed deficient ES cells
E-MEXP-3133_24_1_2_mod.txt	ArrayExpress	E-MEXP-3133	2.3059475459	Mus musculus	Gene expression profiling at early organogenesis in lung and thyroid	Factor.Value.ORGANISM_PART.	lung	thyroid gland
GDS3142_tissue_11_21_mod.txt	GEO	GDS3142	2.22357653226	Mus musculus	Various tissues	tissue	liver	testis
E-GEOD-8961_30_2_5_mod.txt	ArrayExpress	E-GEOD-8961	1.54116688752	Homo sapiens	Transcription profiling by array of human bronchiole epithelial cells infected with human metapneumovirus	Factor.Value.time.	12	72
GDS2237_time_1_3_mod.txt	GEO	GDS2237	-3.34126855204	Rattus norvegicus	Liver response to skin burn: time course	time	1 d	4 d
GDS3113_tissue_18_28_mod.txt	GEO	GDS3113	1.46577655451	Homo sapiens	Various normal tissues	tissue	prostate	thyroid
GDS3142_tissue_4_12_mod.txt	GEO	GDS3142	3.3992094774	Mus musculus	Various tissues	tissue	brain	lung
E-GEOD-29949_54_1_3_mod.txt	ArrayExpress	E-GEOD-29949	-2.42359790366	Mus musculus	Gene expression comparison among spleen dendritic cells	FactorValue..CELL.PHENOTYPE.	Lin- (CD19-CD3-NK1.1-B220-Ter119-) CD11c+CD8-.	Lin- (CD19-CD3-NK1.1-B220-Ter119-) CD45intCD11c-
GDS2682_tissue_1_2_mod.txt	GEO	GDS2682	-2.82004912781	Homo sapiens	Conjunctiva and cornea comparison	tissue	conjunctiva	cornea
GDS3142_tissue_4_13_mod.txt	GEO	GDS3142	2.28135456835	Mus musculus	Various tissues	tissue	brain	muscle
E-GEOD-23006_47_6_7_mod.txt	ArrayExpress	E-GEOD-23006	-1.0633449087	Mus musculus	Transcriptional profiling of a wound healing process in skin and oral mucosa	FactorValue..TIME.POST.WOUND.	5 days	6 hrs
E-GEOD-24207_47_4_15_mod.txt	ArrayExpress	E-GEOD-24207	-1.17575678026	Mus musculus	mRNA analysis in different mouse tissues	FactorValue..TISSUE.	brain	pancreatic islets
E-GEOD-24210_46_1_2_mod.txt	ArrayExpress	E-GEOD-24210	2.69278817992	Mus musculus	Interleukin-35-mediated induction of a novel regulatory T cell population	FactorValue..GENOTYPE.	Foxp3-GFP	wild-type
E-GEOD-21224_25_2_4_mod.txt	ArrayExpress	E-GEOD-21224	1.89237394787	Mus musculus	Transcriptional ontogeny of the developing liver	Factor.Value..DEVELOPMENTAL.STAGE.	PND32 mouse	PND7 mouse
E-GEOD-20244_37_3_5_mod.txt	ArrayExpress	E-GEOD-20244	-3.29793405847	Mus musculus	A comprehensive methylome map of lineage commitment from hematopoietic progenitors	FactorValue..PROGENITOR.POPULATION.	DN1	DN3
GDS3113_tissue_15_25_mod.txt	GEO	GDS3113	2.35573270996	Homo sapiens	Various normal tissues	tissue	pancreas	spleen
E-GEOD-25488_40_3_4_mod.txt	ArrayExpress	E-GEOD-25488	2.21782953881	Mus musculus	Expression data from C3(1)Tag mammary tumors	FactorValue..GENOTYPE.	Her2/Neu	not specified
E-GEOD-21761_66_1_7_mod.txt	ArrayExpress	E-GEOD-21761	2.54945998644	Mus musculus	A large intergenic non-coding RNA induced by p53 mediates global gene repression in the p53 transcriptional response	FactorValue..TIME.	0hrs	not specified
GDS3142_tissue_14_18_mod.txt	GEO	GDS3142	-2.841628631	Mus musculus	Various tissues	tissue	ovary	seminal vesicle
E-GEOD-24207_47_10_11_mod.txt	ArrayExpress	E-GEOD-24207	4.96716088032	Mus musculus	mRNA analysis in different mouse tissues	FactorValue..TISSUE.	liver	lung
E-GEOD-24207_47_2_15_mod.txt	ArrayExpress	E-GEOD-24207	-1.74609460274	Mus musculus	mRNA analysis in different mouse tissues	FactorValue..TISSUE.	adrenal gland	pancreatic islets
E-MEXP-2539_26_1_8_mod.txt	ArrayExpress	E-MEXP-2539	2.04307838719	Mus musculus	Transcription profiling in primary mouse hepatocytes discriminates between true and false genotoxic compounds	Factor.Value.COMPOUND.	2-AAF	EtOH
GDS1962_disease.state_2_3_mod.txt	GEO	GDS1962	-2.53250443043	Homo sapiens	Glioma-derived stem cell factor effect on angiogenesis in the brain	disease.state	glioblastomas	non-tumor
E-GEOD-8023_33_1_2_mod.txt	ArrayExpress	E-GEOD-8023	1.20079775381	Homo sapiens	Transcription profiling of human AML1-ETO transduced cord blood cells, CD34 selected, compared to normal cord blood cells, CD34 selected	Factor.Value.genetic.modification.	AML1-ETO fusion gene	control
E-MEXP-3628_23_1_2_mod.txt	ArrayExpress	E-MEXP-3628	1.06100982873	Homo sapiens	Transcriptional profiling by array of human bone specimens to study miRNA signatures associated with pathogenesis and progression of osteosarcoma	Factor.Value.DISEASE_STATE.	normal	osteosarcoma
E-GEOD-27220_39_1_2_mod.txt	ArrayExpress	E-GEOD-27220	-1.42223855323	Homo sapiens	Transcriptional effects of 1,25 dihydroxi-vitamin D3 physiological and supra-physiological concentrations in breast cancer organotypic culture	FactorValue..CLINICAL.STAGE.		II
GDS3113_tissue_18_21_mod.txt	GEO	GDS3113	-1.108904996	Homo sapiens	Various normal tissues	tissue	prostate	skeletal muscle
GDS565_tissue_2_4_mod.txt	GEO	GDS565	2.39612259812	Mus musculus	Sex specific transcription in somatic and reproductive tissues	tissue	kidney	ovary
E-MEXP-955_44_1_4_mod.txt	ArrayExpress	E-MEXP-955	-2.21683226103	Mus musculus	Transcription profiling of mouse embryonic stem cells	Factor.Value..cell.type.	embryonic stem cell	inner cell mass
E-GEOD-21278_33_4_10_mod.txt	ArrayExpress	E-GEOD-21278	-2.24365740331	Mus musculus	A genomic atlas of mouse hypothalamic development	Factor.Value..AGE.	embryonic day 13	postnatal day 0
E-GEOD-32966_37_4_6_mod.txt	ArrayExpress	E-GEOD-32966	-2.55647598202	Mus musculus	Dermal reprogramming through epidermal activation of beta-catenin	FactorValue..SORTED.CELL.POPULATION.	GFP+ transient activated D2 dermal fibroblasts	ItgA6+ sustained activated D2 epidermal keratinocytes
GDS3113_tissue_4_14_mod.txt	GEO	GDS3113	2.36119531469	Homo sapiens	Various normal tissues	tissue	colon	ovary
E-GEOD-20244_37_4_7_mod.txt	ArrayExpress	E-GEOD-20244	1.17154359486	Mus musculus	A comprehensive methylome map of lineage commitment from hematopoietic progenitors	FactorValue..PROGENITOR.POPULATION.	DN2	MMPFL-
E-GEOD-26408_34_1_4_mod.txt	ArrayExpress	E-GEOD-26408	-2.89022976901	Mus musculus	Signatures of murine B-cell development implicate Yy1 as a regulator of the germinal center-specific program	FactorValue..GENOTYPE.	Bcl6 knock-in	Wild-type
GDS3516_disease.state_1_9_mod.txt	GEO	GDS3516	-1.17079915355	Homo sapiens	Nodular lymphocyte-predominant Hodgkin lymphoma: lymphocytic and histiocytic cells	disease.state	Burkitt lymphoma	normal naive B-cells
E-GEOD-19194_27_1_2_mod.txt	ArrayExpress	E-GEOD-19194	-2.04376609898	Mus musculus	Transcription profiling by array of Mus musculus expressing Cbfb-MYH11	Factor.Value..GENOTYPE.	Cbfb-/-	Cbfb+/+
E-GEOD-23006_47_4_7_mod.txt	ArrayExpress	E-GEOD-23006	-1.06329728433	Mus musculus	Transcriptional profiling of a wound healing process in skin and oral mucosa	FactorValue..TIME.POST.WOUND.	24 hrs	6 hrs
E-GEOD-27505_38_1_2_mod.txt	ArrayExpress	E-GEOD-27505	2.2965129283	Homo sapiens	Prospective Identification, Isolation, and Profiling of a Telomerase-Expressing Subpopulation of Human Neural Stem Cells, using sox2 Enhancer-Directed Fluorescence-Activated Cell Sorting	FactorValue..CELL.TYPE.	SOX2-	SOX2+
GDS3113_tissue_7_12_mod.txt	GEO	GDS3113	2.98829039349	Homo sapiens	Various normal tissues	tissue	fetal liver	lung
E-GEOD-25119_43_3_4_mod.txt	ArrayExpress	E-GEOD-25119	-2.83425787596	Homo sapiens	Comparison of CD4+ T cells from human fetal and adult donors	FactorValue..ORIGINAL.CELLS.	fetal liver HSC	not specified
E-GEOD-20524_30_2_3_mod.txt	ArrayExpress	E-GEOD-20524	1.78702420384	Mus musculus	Blood Gene Expression Signatures Predict Invasive Candidiasis	Factor.Value..INFECTION.STATUS.	healthy	staph
GDS3142_tissue_2_3_mod.txt	GEO	GDS3142	2.49110899796	Mus musculus	Various tissues	tissue	adrenal gland	bone marrow
GDS968_individual_8_15_mod.txt	GEO	GDS968	2.13133738505	Homo sapiens	Radiation therapy toxicity association with abnormal transcriptional response to DNA damage	individual	NoCa2	NoCa9
E-GEOD-21247_58_1_2_mod.txt	ArrayExpress	E-GEOD-21247	-1.87937707308	Mus musculus	Network Analysis of Skin Tumor Progression Identifies a Rewired Genetic Architecture Affecting Inflammation and Tumor Susceptibility (carcinomas)	FactorValue..TUMOR_CLASS.	1	2
E-GEOD-26866_41_1_5_mod.txt	ArrayExpress	E-GEOD-26866	4.34678301137	Homo sapiens	Combined Use of Laser Capture Microdissection and Microarray Analysis Identifies Locally Expressed Disease-Related Genes in Focal Regions of Psoriasis Vulgaris Skin Lesions	FactorValue..REGION.	EPI (epidermis)	whole
E-MEXP-1649_37_6_8_mod.txt	ArrayExpress	E-MEXP-1649	-2.39090969587	Mus musculus	Transcription profiling of mouse liver cells with liver specific deletion of Irs1 and/or Irs2 and Foxo1during fasting and feeding	Factor.Value..GENOTYPE.	Liver Specific Irs1 -/-::Irs2 -/-	Liver Specific Irs2 -/-
GDS988_cell.line_2_3_mod.txt	GEO	GDS988	8.69312262847	Homo sapiens	Kaposi's sarcoma-associated herpesvirus LANA overexpression in B lymphoid cells: time course	cell.line	BJAB	Jurkat
E-GEOD-24207_47_14_22_mod.txt	ArrayExpress	E-GEOD-24207	3.53517381177	Mus musculus	mRNA analysis in different mouse tissues	FactorValue..TISSUE.	pancreatic acini	testis
E-GEOD-30016_38_2_3_mod.txt	ArrayExpress	E-GEOD-30016	-5.12307065778	Mus musculus	Comparison of polysomal profiles of murine adult normal	FactorValue..GENOTYPE.VARIATION.	progeny of olig2 RP-eGFP bacTRAP reporters and Ntv-a ink4a/arf-/- pten fl/fl mice, transplanted with non-fluorescent tumor cells intracranially	progeny of olig2 RP-eGFP bacTRAP reporters and Ntv-a ink4a/arf-/- pten fl/fl mice, uninjected
E-GEOD-32408_30_1_2_mod.txt	ArrayExpress	E-GEOD-32408	-2.90948307786	Homo sapiens	Expression data from TOP-GFP sorted colon cancer cells	FactorValue..ORGANISM.PART.	Tumor tissue grown from cultured colon cancer cell line	Tumor tissue grown from patient dervived colon cancer specimen
GDS2841_tissue_2_5_mod.txt	GEO	GDS2841	-1.64621658318	Rattus norvegicus	Alcohol-preferring inbred strain: brain	tissue	amygdala	hippocampus
GDS589_tissue_4_21_mod.txt	GEO	GDS589	1.23049998632	Rattus norvegicus	Multiple normal tissue gene expression across strains	tissue	cerebellum	pineal
E-GEOD-25488_41_1_3_mod.txt	ArrayExpress	E-GEOD-25488	1.24973376074	Mus musculus	Expression data from C3(1)Tag mammary tumors	FactorValue..TISSUE.	primary mammary tissue	tissue culture cells
GDS3113_tissue_12_21_mod.txt	GEO	GDS3113	-2.88225733404	Homo sapiens	Various normal tissues	tissue	lung	skeletal muscle
GDS3142_tissue_7_17_mod.txt	GEO	GDS3142	-2.45608570936	Mus musculus	Various tissues	tissue	eye	salivary gland
GDS589_tissue_5_20_mod.txt	GEO	GDS589	-2.28254895218	Rattus norvegicus	Multiple normal tissue gene expression across strains	tissue	cerebral cortex	nucleus accumbens whole
GDS3113_tissue_7_26_mod.txt	GEO	GDS3113	1.54322170093	Homo sapiens	Various normal tissues	tissue	fetal liver	testis
GDS3142_tissue_14_19_mod.txt	GEO	GDS3142	-2.88361581902	Mus musculus	Various tissues	tissue	ovary	small intestine
GDS589_tissue_5_24_mod.txt	GEO	GDS589	1.47864260039	Rattus norvegicus	Multiple normal tissue gene expression across strains	tissue	cerebral cortex	primary cortex neurons
E-GEOD-19650_38_2_4_mod.txt	ArrayExpress	E-GEOD-19650	4.9753346388	Homo sapiens	Expression data from epithelial cells during the process of multistep pancreatic carcinogenesis	FactorValue..DISEASE.STATUS.	intraductal papillary-mucinous carcinoma (IPMC)	normal
GDS1608_tissue_1_3_mod.txt	GEO	GDS1608	-1.37495077947	Rattus norvegicus	Cocaine addiction effect on reward-related brain regions	tissue	amygdala	medial prefrontal cortex
E-MEXP-2320_39_1_2_mod.txt	ArrayExpress	E-MEXP-2320	-4.58527756834	Mus musculus	Transcription profiling of mouse long-lived S6K1 -/- strain females compared to wild types	Factor.Value.OrganismPart.	fat	liver
GDS3142_tissue_2_8_mod.txt	GEO	GDS3142	3.44285021985	Mus musculus	Various tissues	tissue	adrenal gland	fetus
E-GEOD-24207_47_3_5_mod.txt	ArrayExpress	E-GEOD-24207	-1.57265486564	Mus musculus	mRNA analysis in different mouse tissues	FactorValue..TISSUE.	bone marrow	diaphragm
E-GEOD-24207_47_3_22_mod.txt	ArrayExpress	E-GEOD-24207	-2.25028301518	Mus musculus	mRNA analysis in different mouse tissues	FactorValue..TISSUE.	bone marrow	testis
GDS1381_individual_4_6_mod.txt	GEO	GDS1381	-6.64579156352	Homo sapiens	Carboplatin sensitive and resistant ovarian carcinoma	individual	patient 4	patient 6
GDS3142_tissue_7_13_mod.txt	GEO	GDS3142	-1.39968836259	Mus musculus	Various tissues	tissue	eye	muscle
E-GEOD-20426_40_1_2_mod.txt	ArrayExpress	E-GEOD-20426	1.18298880571	Mus musculus	Hepatic gene expression during liver regeneration in response to partial hepatectomy: late time points (24h	FactorValue..TREATMENT.	none	partial hepatectomy
E-GEOD-16728_33_2_3_mod.txt	ArrayExpress	E-GEOD-16728	-1.70457159903	Homo sapiens	Transcription profiling of whole blood from sickle-cell disease patients using globin mRNA reduction	Factor.Value.Sample.Preparation.	RNA extracted from PBMC	total RNA
GDS1490_tissue_10_29_mod.txt	GEO	GDS1490	-1.24718580301	Mus musculus	Neural tissue profiling	tissue	heart	spleen
GDS3113_tissue_15_27_mod.txt	GEO	GDS3113	1.74406484358	Homo sapiens	Various normal tissues	tissue	pancreas	thymus
E-GEOD-21483_39_1_2_mod.txt	ArrayExpress	E-GEOD-21483	-3.03083275373	Homo sapiens	Regulation of HB-EGF by miR-212 and acquired cetuximab-resistance in head and neck cancer	FactorValue..CETUXIMAB.SENSITIVITY.	resistant	sensitive
E-GEOD-24207_47_5_15_mod.txt	ArrayExpress	E-GEOD-24207	-3.51431801964	Mus musculus	mRNA analysis in different mouse tissues	FactorValue..TISSUE.	diaphragm	pancreatic islets
E-GEOD-32223_33_1_2_mod.txt	ArrayExpress	E-GEOD-32223	2.05840859011	Mus musculus	Transcriptional profile of ER71 EYFP positive/negative cells in ER71 WT and MT embryos	FactorValue..EYFP.	negative	positive
GDS2615_time_1_7_mod.txt	GEO	GDS2615	-2.17154679509	Homo sapiens	Mucociliary differentiation of airway epithelial cells	time	0 d	21 d
E-GEOD-33199_29_4_7_mod.txt	ArrayExpress	E-GEOD-33199	1.26954666959	Mus musculus	A mouse model of the most aggressive subgroup of human medulloblastoma [Mouse430 2]	FactorValue..VARIATION.	p53-/-, Cdkn2c-/- infected with hcMyc/GFP	p53-/-, Cdkn2c-/-, Math1-GFP FACS sort for GFP+
E-GEOD-25488_40_3_6_mod.txt	ArrayExpress	E-GEOD-25488	1.41821074953	Mus musculus	Expression data from C3(1)Tag mammary tumors	FactorValue..GENOTYPE.	Her2/Neu	p53 KO ER pos
E-GEOD-12548_28_3_5_mod.txt	ArrayExpress	E-GEOD-12548	1.38600476725	Homo sapiens	Transcription profiling by array of a human retinal pigment epithelium cell line after treatment with tumor necrosis factor and tumor growth factor	Factor.Value.time.	16	42
GDS598_protocol_1_10_mod.txt	GEO	GDS598	1.09829380503	Rattus norvegicus	Cardiac hypertrophy: comparison of various induction models	protocol	aortic banding	neonatal
GDS2819_individual_3_20_mod.txt	GEO	GDS2819	2.83315188079	Homo sapiens	Leukemic white blood cells and various RNA preparation protocols	individual	patient 11	patient 27
E-GEOD-35338_36_2_4_mod.txt	ArrayExpress	E-GEOD-35338	-3.03777030289	Mus musculus	Expression data from reactive astrocytes acutely purified from young adult mouse brains	FactorValue..TREATMENT.	MCAO-induced stroke	sham surgery
E-GEOD-29437_47_1_3_mod.txt	ArrayExpress	E-GEOD-29437	3.24018054039	Homo sapiens	Progesterone inhibits epithelial-to-mesenchymal transition in endometrial cancer	FactorValue..TREAMENT.	1 nM medroxyprogesterone acetate (MPA)	not specified
E-TABM-669_25_1_6_mod.txt	ArrayExpress	E-TABM-669	2.5627100456	Mus musculus	Transcription profiling of mouse embryonic stem cell line Sox1Tv2 during neuronal differentiation	Factor.Value..Age.d..	E14+0 days	E14+6 days
E-TABM-672_24_4_6_mod.txt	ArrayExpress	E-TABM-672	2.30064960518	Mus musculus	Transcription profiling of mouse embyronic stem cell line CGR8 during the first 10 days of differentiation into embryoid bodies	Factor.Value..Age.	3	5
GDS1265_age_4_5_mod.txt	GEO	GDS1265	-4.71266345179	Mus musculus	Oocyte development (MOE430A)	age	2 d	6 d
E-GEOD-27987_35_4_7_mod.txt	ArrayExpress	E-GEOD-27987	-2.20230424441	Mus musculus	Differential pre-mRNA processing in Crebbp+/- mice	FactorValue..CELL.TYPE.	Crebbp+/- MEF	Ep300+/- FLHSC
E-TABM-1118_26_1_2_mod.txt	ArrayExpress	E-TABM-1118	-6.79698689762	Homo sapiens	Transcrption profiling by array of human breast cancer cells treated with LPS-Stimulated macrophage conditioned media	Factor.Value..CELLLINE.	MDA-MB-231	T47D
E-MEXP-2170_22_1_2_mod.txt	ArrayExpress	E-MEXP-2170	-2.25693428202	Homo sapiens	Transcription profiling by array of human acute myeloid leukemia cells after treatment with rapamycin	Factor.Value..cell.line.	MV4-11	THP-1
GDS3113_tissue_22_29_mod.txt	GEO	GDS3113	-1.3628044077	Homo sapiens	Various normal tissues	tissue	skin	tonsil
GDS3142_tissue_18_20_mod.txt	GEO	GDS3142	1.53435833649	Mus musculus	Various tissues	tissue	seminal vesicle	spleen
GDS3113_tissue_15_16_mod.txt	GEO	GDS3113	1.75544543172	Homo sapiens	Various normal tissues	tissue	pancreas	peripheral blood lymphocyte
GDS2545_tissue_1_3_mod.txt	GEO	GDS2545	1.21300009406	Homo sapiens	Metastatic prostate cancer (HG-U95A)	tissue	metastatic prostate tumor	normal prostate tissue
GDS3142_tissue_11_18_mod.txt	GEO	GDS3142	2.8009264526	Mus musculus	Various tissues	tissue	liver	seminal vesicle
E-GEOD-13093_28_5_7_mod.txt	ArrayExpress	E-GEOD-13093	1.10211812715	Mus musculus	Feeding schedule and the circadian clock shape rhythms in hepatic gene expression	FactorValue..STRAIN.OR.LINE.	Cry1,Cry2 double KO mice, Gender: male, Age: 8-16 weeks, Condition: ad libitum food availability	Cry1,Cry2 double KO, Gender: female, Age: 8-16 weeks, Condition: temporally restricted food availability CT1(25)-CT9(33)
GDS565_tissue_4_5_mod.txt	GEO	GDS565	-1.8493026831	Mus musculus	Sex specific transcription in somatic and reproductive tissues	tissue	ovary	testis
E-GEOD-16249_44_1_2_mod.txt	ArrayExpress	E-GEOD-16249	1.3971980782	Homo sapiens	siRNA-mediated knockdown of MITF and PAX3 in metastatic melanoma cell lines	FactorValue..CELL.LINE.	NZM12	NZM15
E-GEOD-34126_43_2_3_mod.txt	ArrayExpress	E-GEOD-34126	-2.10990589081	Mus musculus	An Animal Model of Myc-driven medulloblastoma	FactorValue..GENOTYPE.VARIATION.	Ptch1 mutant	tumor-bearing mice
E-GEOD-24207_47_11_17_mod.txt	ArrayExpress	E-GEOD-24207	-1.41206097799	Mus musculus	mRNA analysis in different mouse tissues	FactorValue..TISSUE.	lung	placenta
E-GEOD-32386_33_1_2_mod.txt	ArrayExpress	E-GEOD-32386	2.12638449618	Mus musculus	Expression profiling of murine neuroblastoma in transgenic mice	FactorValue..GENOTYPE.	not specified	transgenic for neural crest-specific expression of mutated ALK
E-GEOD-17302_56_3_6_mod.txt	ArrayExpress	E-GEOD-17302	1.134912498	Homo sapiens	IFN-mediated gene expression patterns	FactorValue..AGENT.	anti CD3/CD8 beads+IFN5	not specified
E-GEOD-22139_37_4_5_mod.txt	ArrayExpress	E-GEOD-22139	-1.82981070781	Homo sapiens	Bone morphogenetic protein-7 is a MYC target with pro-survival functions in childhood medulloblastoma	FactorValue..GENETIC.MODIFICATION.	siRNA cMYC silenced	siRNA scrambled
GDS3142_tissue_6_14_mod.txt	GEO	GDS3142	1.95555124926	Mus musculus	Various tissues	tissue	embryonic stem cells	ovary
E-GEOD-17302_56_2_6_mod.txt	ArrayExpress	E-GEOD-17302	1.08646324801	Homo sapiens	IFN-mediated gene expression patterns	FactorValue..AGENT.	anti CD3/CD8 beads+IFN2	not specified
E-GEOD-7214_22_1_3_mod.txt	ArrayExpress	E-GEOD-7214	-1.27256656564	Homo sapiens	Comparison of gene expression data between wild-type and DM1-affected cells	Factor.Value..KARYOTYPE.	not specified	X,Y
E-GEOD-26866_41_1_2_mod.txt	ArrayExpress	E-GEOD-26866	4.52534783671	Homo sapiens	Combined Use of Laser Capture Microdissection and Microarray Analysis Identifies Locally Expressed Disease-Related Genes in Focal Regions of Psoriasis Vulgaris Skin Lesions	FactorValue..REGION.	EPI (epidermis)	ICs (infiltrated cells)
GDS2276_time_2_3_mod.txt	GEO	GDS2276	-1.83393845617	Mus musculus	Embryonic stem cell line response to the conditional expression of neurogenin 3	time	10 days	3 days
E-GEOD-7869_29_2_3_mod.txt	ArrayExpress	E-GEOD-7869	-1.31222227995	Homo sapiens	Transcription profiling by array of human renal cysts from patients with autosomal dominant polycystic kidney disease	Factor.Value.histology.	medium cyst	non cystic
GDS2819_individual_6_20_mod.txt	GEO	GDS2819	1.97342675717	Homo sapiens	Leukemic white blood cells and various RNA preparation protocols	individual	patient 14	patient 27
E-GEOD-29458_34_1_2_mod.txt	ArrayExpress	E-GEOD-29458	3.69424636327	Mus musculus	Expression data from PDGF driven mouse tumors	FactorValue..TISSUE.	Normal brain	Tumor
E-GEOD-11005_32_1_2_mod.txt	ArrayExpress	E-GEOD-11005	-1.13635037431	Mus musculus	Immune Responses to Pneumocystis Infection are Robust in Immunocompetent Mice but Absent in CD40 Ligand Deficient Mice	FactorValue..STRAIN.OR.LINE.	C57BL	CD40L-KO
E-TABM-669_25_2_6_mod.txt	ArrayExpress	E-TABM-669	-1.38492273799	Mus musculus	Transcription profiling of mouse embryonic stem cell line Sox1Tv2 during neuronal differentiation	Factor.Value..Age.d..	E14+10 days	E14+6 days
E-TABM-683_30_1_3_mod.txt	ArrayExpress	E-TABM-683	-4.19625635893	Mus musculus	Transcription profiling of mouse normal mammary gland epithelial populations: basal/myoepithelial	Factor.Value..CellType.	mammary basal/myoepithelial cells	mammary luminal ER+ cells
E-GEOD-24628_23_1_3_mod.txt	ArrayExpress	E-GEOD-24628	-1.89426163695	Mus musculus	Subtypes of medulloblastoma have distinct developmental origins	Factor.Value..GENOTYPE.VARIATION.	BlbpCre; Ctnnb1(FlxEx3/+); Tp53 (Flx/Flx)	wildtype
GDS3142_tissue_17_22_mod.txt	GEO	GDS3142	1.52455612594	Mus musculus	Various tissues	tissue	salivary gland	thymus
E-GEOD-33134_32_2_3_mod.txt	ArrayExpress	E-GEOD-33134	2.13718601047	Mus musculus	Protective gene expression changes elicited by an inherited defect in photoreceptor structure.	FactorValue..AGE.	post natal day 21	post natal day 6
GDS3516_disease.state_7_11_mod.txt	GEO	GDS3516	1.91874600988	Homo sapiens	Nodular lymphocyte-predominant Hodgkin lymphoma: lymphocytic and histiocytic cells	disease.state	normal centrocytes	T-cell rich B-cell lymphoma
GDS3142_tissue_10_20_mod.txt	GEO	GDS3142	2.86108809576	Mus musculus	Various tissues	tissue	kidney	spleen
E-MEXP-1413_38_1_2_mod.txt	ArrayExpress	E-MEXP-1413	1.30606071438	Mus musculus	Transcription profiling of liver from mouse EF2 mutants vs wild type to investigate the role of E2F2 in liver regeneration	Factor.Value..time.	0	48
E-GEOD-17266_34_1_2_mod.txt	ArrayExpress	E-GEOD-17266	-4.34892852153	Mus musculus	Expression data from B6C3F1 mice treated with baclofen	FactorValue..TISSUE.	Bone Marrow	Liver
E-GEOD-30747_50_2_4_mod.txt	ArrayExpress	E-GEOD-30747	-1.68684380155	Mus musculus	AML mouse models	FactorValue..TRANSGENE.	inducible MLL-AF9;KrasG12D	not specified
E-GEOD-28799_38_1_2_mod.txt	ArrayExpress	E-GEOD-28799	4.65723731454	Homo sapiens	Isolation and characterization of stem-like cells from a human ovarian cancer cell line	FactorValue..BIOSOURCEPROVIDER.	ATCC, Manassas, VA	Ovarian Cancer Institute
GDS3113_tissue_11_12_mod.txt	GEO	GDS3113	3.48084015448	Homo sapiens	Various normal tissues	tissue	liver	lung
E-GEOD-13093_28_1_7_mod.txt	ArrayExpress	E-GEOD-13093	-1.03581330395	Mus musculus	Feeding schedule and the circadian clock shape rhythms in hepatic gene expression	FactorValue..STRAIN.OR.LINE.	C57/B6, Gender: male, Age: 8-12 weeks	Cry1,Cry2 double KO, Gender: female, Age: 8-16 weeks, Condition: temporally restricted food availability CT1(25)-CT9(33)
E-GEOD-21761_68_1_3_mod.txt	ArrayExpress	E-GEOD-21761	-3.3125179961	Mus musculus	A large intergenic non-coding RNA induced by p53 mediates global gene repression in the p53 transcriptional response	FactorValue..TRANSFECTION.	AdenoCRE	not specified
GDS2841_tissue_2_3_mod.txt	GEO	GDS2841	-1.52863386327	Rattus norvegicus	Alcohol-preferring inbred strain: brain	tissue	amygdala	caudate-putamen
E-GEOD-18649_36_2_4_mod.txt	ArrayExpress	E-GEOD-18649	2.2580079697	Mus musculus	Molecular Profiling of the Developing Axial Skeleton: A role for Tgfbr2 in the Development of the Intervertebral Disc.	FactorValue..GENOTYPE.	Cre+;Tgfbr2lox/lox	not specified
E-TABM-672_24_2_9_mod.txt	ArrayExpress	E-TABM-672	4.10469217813	Mus musculus	Transcription profiling of mouse embyronic stem cell line CGR8 during the first 10 days of differentiation into embryoid bodies	Factor.Value..Age.	1	10
E-GEOD-24813_42_1_2_mod.txt	ArrayExpress	E-GEOD-24813	1.10430688343	Mus musculus	Gene expression data of BCR-ABL1 transformed myeloid cells from BCL6 wild-type and BCL6 knockout mice treated with and without Imatinib and RI-BPI	FactorValue..GENOTYPE.VARIATION.	BCL6 KO	BCL6 WT
E-GEOD-24207_47_4_21_mod.txt	ArrayExpress	E-GEOD-24207	3.10254236419	Mus musculus	mRNA analysis in different mouse tissues	FactorValue..TISSUE.	brain	spleen
E-GEOD-24207_47_14_19_mod.txt	ArrayExpress	E-GEOD-24207	4.34579244219	Mus musculus	mRNA analysis in different mouse tissues	FactorValue..TISSUE.	pancreatic acini	seminal vesicle
E-GEOD-8961_30_1_5_mod.txt	ArrayExpress	E-GEOD-8961	1.50013807964	Homo sapiens	Transcription profiling by array of human bronchiole epithelial cells infected with human metapneumovirus	Factor.Value.time.	6	72
GDS2819_individual_3_19_mod.txt	GEO	GDS2819	3.73529479162	Homo sapiens	Leukemic white blood cells and various RNA preparation protocols	individual	patient 11	patient 26
GDS1956_disease.state_4_11_mod.txt	GEO	GDS1956	-1.63406608195	Homo sapiens	Various muscle diseases (HG-U133A)	disease.state	Calpain 3 mutation	normal
E-GEOD-9038_37_1_2_mod.txt	ArrayExpress	E-GEOD-9038	-2.74202199029	Mus musculus	Gene expression profiles of striatum and cerebellum from knock-in mouse model of Huntington's disease	FactorValue..TISSUE.	cerebellum	striatum
E-GEOD-33892_48_1_2_mod.txt	ArrayExpress	E-GEOD-33892	2.4224810299	Homo sapiens	Comparison of TEX and M9-ENL1 cell lines to HL60 and THP1 cell lines	FactorValue..CELL.LINE.	HL-60	M9-ENL1
E-GEOD-20272_23_1_2_mod.txt	ArrayExpress	E-GEOD-20272	7.32150136872	Homo sapiens	Expression data from human ovarian cancer cells induced by IL-6 and CNTO328	Factor.Value..CELL.LINE.	Caov-3	SKOV-3
GDS2819_individual_18_24_mod.txt	GEO	GDS2819	1.83184298851	Homo sapiens	Leukemic white blood cells and various RNA preparation protocols	individual	patient 25	patient 6
E-GEOD-37566_37_3_4_mod.txt	ArrayExpress	E-GEOD-37566	-1.3118658586	Mus musculus	Dendritic cell and monocyte progenitors	FactorValue..CELL.TYPE.	Ly6Chi monocytes	Macrophage & Dendritic cell Progenitors (MDPs)
GDS2957_cell.type_1_2_mod.txt	GEO	GDS2957	-1.56296037316	Mus musculus	Resting and activated natural killer cells	cell.type	activated NK cells	resting bulk splenocytes
E-GEOD-24207_47_13_16_mod.txt	ArrayExpress	E-GEOD-24207	-4.71777783969	Mus musculus	mRNA analysis in different mouse tissues	FactorValue..TISSUE.	ovary	pituitary gland
E-GEOD-20950_27_1_2_mod.txt	ArrayExpress	E-GEOD-20950	1.86458072016	Homo sapiens	Transcription profiling by array of human adipose tissue from obese patients	Factor.Value..organism.part.	omental adipose	subcutaneous adipose
GDS3113_tissue_12_15_mod.txt	GEO	GDS3113	-3.25090601559	Homo sapiens	Various normal tissues	tissue	lung	pancreas
GDS3142_tissue_8_10_mod.txt	GEO	GDS3142	-3.9225596105	Mus musculus	Various tissues	tissue	fetus	kidney
GDS1265_development.stage_3_4_mod.txt	GEO	GDS1265	-5.43938610069	Mus musculus	Oocyte development (MOE430A)	development.stage	primordial follicle	secondary follicle
E-TABM-672_24_4_5_mod.txt	ArrayExpress	E-TABM-672	2.01596086794	Mus musculus	Transcription profiling of mouse embyronic stem cell line CGR8 during the first 10 days of differentiation into embryoid bodies	Factor.Value..Age.	3	4
E-GEOD-20667_35_1_4_mod.txt	ArrayExpress	E-GEOD-20667	-3.14889696742	Homo sapiens	The Notch/Hes1 pathway sustains NF-B activation through CYLD repression in T cell leukemia	FactorValue..CELL.LINE.	ACC483 [HPB-ALL]	JCRB0086 [TALL-1]
E-GEOD-23938_38_1_6_mod.txt	ArrayExpress	E-GEOD-23938	-2.64201092842	Mus musculus	Comprehensive genomic profiling identified miRNA signatures associated with mammary tumor differentiation and development	FactorValue..GENETICALLY.ENGINEERED.MOUSE.MODEL.	Brca1-/-p53+/-	MMTV-PymT
E-GEOD-31782_35_1_4_mod.txt	ArrayExpress	E-GEOD-31782	-1.20248263781	Homo sapiens	Knock-down and Over-expression of JMJD6 in MCF-7 and/or MDA-MB231	FactorValue..JMJD6.EXPRESSION.	Control (empty vector)	Over-expressed
E-GEOD-28559_42_1_2_mod.txt	ArrayExpress	E-GEOD-28559	1.42874198249	Mus musculus	An expression microarray approach for the identification of candidate metastable epialleles in the mouse genome	FactorValue..SITE.	brain	kidney
GDS3113_tissue_14_16_mod.txt	GEO	GDS3113	-1.77705558288	Homo sapiens	Various normal tissues	tissue	ovary	peripheral blood lymphocyte
E-GEOD-36820_37_2_3_mod.txt	ArrayExpress	E-GEOD-36820	-2.29715694293	Homo sapiens	Expression data from ACC xenografts and normal salivary glands	FactorValue..DONOR.SEX.	male	unknown
GDS2213_agent_2_4_mod.txt	GEO	GDS2213	-2.77468447606	Homo sapiens	Hepatoma cell response to inhibition of DNA methylation and histone deacetylation	agent	5-aza-dC plus TSA	untreated
GDS1629_protocol_2_4_mod.txt	GEO	GDS1629	-1.97578452508	Rattus norvegicus	Immortalized suprachiasmatic nucleus cell line across circadian cycles: time course	protocol	biological replicate 2	technical replicate 1
GDS2880_disease.state_1_2_mod.txt	GEO	GDS2880	1.92493016041	Homo sapiens	Clear cell renal cell carcinoma (HG-U133A)	disease.state	normal	stage I cRCC
E-GEOD-24547_44_1_3_mod.txt	ArrayExpress	E-GEOD-24547	-7.87686848816	Homo sapiens	Transcriptional pathway signatures for the Aurora inhibitor Danusertib	FactorValue..CELL.LINE.	A2780	HCT-116
GDS3113_tissue_11_32_mod.txt	GEO	GDS3113	3.29084704732	Homo sapiens	Various normal tissues	tissue	liver	uterus
E-GEOD-34482_31_4_6_mod.txt	ArrayExpress	E-GEOD-34482	-1.68373832907	Homo sapiens	Expression data from transfection of SW1783 and U87 glioma cells with miR-376a* for 24 and 72 hours	FactorValue..TRANSFECTED.	miR-376a*A (72 h)	miR-376a*G (72 h)
E-GEOD-21716_41_1_5_mod.txt	ArrayExpress	E-GEOD-21716	2.96131032993	Mus musculus	Hepatic xenobiotic metabolizing enzyme gene expression through the life stages of the mouse	FactorValue..AGE.	12 month	GD19
GDS3113_tissue_11_27_mod.txt	GEO	GDS3113	1.97399898247	Homo sapiens	Various normal tissues	tissue	liver	thymus
E-GEOD-15580_37_3_4_mod.txt	ArrayExpress	E-GEOD-15580	-3.39656158813	Mus musculus	Molecular Signatures of Fetal and Adult Prostate Stem Cells	FactorValue..CELL.TYPE.	FACS sorted Sca-1Neg-labelled cells of normal prostate	Urogenital sinus epithelium cells from embryos
GDS2819_individual_8_20_mod.txt	GEO	GDS2819	-1.90374613197	Homo sapiens	Leukemic white blood cells and various RNA preparation protocols	individual	patient 16	patient 27
E-GEOD-24207_47_15_22_mod.txt	ArrayExpress	E-GEOD-24207	2.30731493984	Mus musculus	mRNA analysis in different mouse tissues	FactorValue..TISSUE.	pancreatic islets	testis
GDS1962_tissue_2_4_mod.txt	GEO	GDS1962	2.34301010254	Homo sapiens	Glioma-derived stem cell factor effect on angiogenesis in the brain	tissue	tumor grade II	tumor grade IV
E-GEOD-24207_47_4_5_mod.txt	ArrayExpress	E-GEOD-24207	2.33856123938	Mus musculus	mRNA analysis in different mouse tissues	FactorValue..TISSUE.	brain	diaphragm
GDS3113_tissue_20_29_mod.txt	GEO	GDS3113	1.30928177984	Homo sapiens	Various normal tissues	tissue	salivary gland	tonsil
E-GEOD-24207_47_14_20_mod.txt	ArrayExpress	E-GEOD-24207	3.02022825106	Mus musculus	mRNA analysis in different mouse tissues	FactorValue..TISSUE.	pancreatic acini	small intestine
E-MEXP-1504_36_1_3_mod.txt	ArrayExpress	E-MEXP-1504	3.32192339445	Mus musculus	Transcription profiling of liver	Factor.Value..organism.part.	kidney	lung
GDS3142_tissue_2_18_mod.txt	GEO	GDS3142	1.30704535415	Mus musculus	Various tissues	tissue	adrenal gland	seminal vesicle
GDS181_tissue_14_26_mod.txt	GEO	GDS181	-1.63228102903	Homo sapiens	Large-scale analysis of the human transcriptome (HG-U95A)	tissue	HUVEC	prostate cancer
GDS2819_individual_3_25_mod.txt	GEO	GDS2819	3.32486789862	Homo sapiens	Leukemic white blood cells and various RNA preparation protocols	individual	patient 11	patient 7
E-TABM-672_24_2_7_mod.txt	ArrayExpress	E-TABM-672	3.80868788708	Mus musculus	Transcription profiling of mouse embyronic stem cell line CGR8 during the first 10 days of differentiation into embryoid bodies	Factor.Value..Age.	1	6
E-CBIL-48_50_2_3_mod.txt	ArrayExpress	E-CBIL-48	2.08612895694	Mus musculus	Transcription profiling of mouse Ngn3 expressing cells and endocrine pancreatic cells from wild type and Ngn3 mutant animals at day 15 of embryonic development	Factor.Value..Tissue.or.Cell.Type.	EYFP+ cells	pancreas
E-GEOD-18281_36_2_6_mod.txt	ArrayExpress	E-GEOD-18281	2.94313234075	Mus musculus	Spatial mapping of thymic stromal microenvironments reveals unique features influencing T lymphoid differentiation	FactorValue..TISSUE.	n/a	Whole medulla
E-GEOD-21515_27_2_4_mod.txt	ArrayExpress	E-GEOD-21515	-1.90821372939	Mus musculus	Expression data from mouse ES and iPS cells	Factor.Value..CELL.LINE.	IP14D-1	IP20D-3
GDS3142_tissue_16_21_mod.txt	GEO	GDS3142	-1.34731421507	Mus musculus	Various tissues	tissue	placenta	testis
E-GEOD-28598_45_1_2_mod.txt	ArrayExpress	E-GEOD-28598	-2.58502711649	Mus musculus	Protection from obesity and diabetes by blockade of TGF-beta/Smad3 signaling	FactorValue..GENOTYPE.	not specified	Smad3-/-
GDS3516_disease.state_4_7_mod.txt	GEO	GDS3516	-2.03737789207	Homo sapiens	Nodular lymphocyte-predominant Hodgkin lymphoma: lymphocytic and histiocytic cells	disease.state	follicular lymphoma	normal centrocytes
E-MEXP-1976_23_2_4_mod.txt	ArrayExpress	E-MEXP-1976	1.39837876856	Mus musculus	Transcription profiling of Mixl1 heterozygous or null mouse embryonic stem cells to identify downstream transcriptional targets during early development	Factor.Value..TIME.	2.8	4
GDS589_tissue_4_27_mod.txt	GEO	GDS589	1.50107496974	Rattus norvegicus	Multiple normal tissue gene expression across strains	tissue	cerebellum	spleen
E-GEOD-13873_34_1_2_mod.txt	ArrayExpress	E-GEOD-13873	6.42579958008	Mus musculus	Expression data from murine gastric epithelium	FactorValue..INFECTION.	infected	n/a
E-GEOD-24210_47_2_3_mod.txt	ArrayExpress	E-GEOD-24210	-2.6868776663	Mus musculus	Interleukin-35-mediated induction of a novel regulatory T cell population	FactorValue..TREATMENT.	IL35	untreated
E-TABM-672_24_4_7_mod.txt	ArrayExpress	E-TABM-672	2.46543374034	Mus musculus	Transcription profiling of mouse embyronic stem cell line CGR8 during the first 10 days of differentiation into embryoid bodies	Factor.Value..Age.	3	6
E-GEOD-13873_35_2_4_mod.txt	ArrayExpress	E-GEOD-13873	5.62943335114	Mus musculus	Expression data from murine gastric epithelium	FactorValue..PATHOLOGY.	hyperplasia	n/a
E-GEOD-24637_42_3_4_mod.txt	ArrayExpress	E-GEOD-24637	-4.51878142132	Mus musculus	Genetic and genomic analysis of hyperlipidemia	FactorValue..TISSUE.	muscle	pancreas
GDS2237_time_1_2_mod.txt	GEO	GDS2237	-3.11403299447	Rattus norvegicus	Liver response to skin burn: time course	time	1 d	2 d
E-GEOD-27987_35_6_8_mod.txt	ArrayExpress	E-GEOD-27987	-2.10207382544	Mus musculus	Differential pre-mRNA processing in Crebbp+/- mice	FactorValue..CELL.TYPE.	Crebbp+/+ MEF	Ep300+/+ FLHSC
E-TABM-1027_34_1_3_mod.txt	ArrayExpress	E-TABM-1027	2.00934586305	Mus musculus	Transcription profiling of mouse embryonic stem cell line D3 differentiation cultures treated by different concentrations of flusilazole.	Factor.Value..TIME.	0	48
GDS3113_tissue_12_18_mod.txt	GEO	GDS3113	-1.77335233804	Homo sapiens	Various normal tissues	tissue	lung	prostate
E-GEOD-28185_35_1_2_mod.txt	ArrayExpress	E-GEOD-28185	1.35931088864	Homo sapiens	Non-steroidal anti-inflammatory drugs induce apoptosis and differentiation through an AP-1 and GADD45 dependent pathway in human acute myeloid leukemia cells	FactorValue..CELL.LINE.	HL60	THP-1
E-GEOD-24207_47_1_19_mod.txt	ArrayExpress	E-GEOD-24207	-3.38399672828	Mus musculus	mRNA analysis in different mouse tissues	FactorValue..TISSUE.	adipose tissue	seminal vesicle
E-MEXP-3444_36_1_5_mod.txt	ArrayExpress	E-MEXP-3444	-2.07810764225	Mus musculus	Transcriptional profiling by array of mouse cerebellar cortex during postnatal development	Factor.Value.AGE.	0	10
GDS3113_tissue_5_11_mod.txt	GEO	GDS3113	-1.34956946701	Homo sapiens	Various normal tissues	tissue	fetal brain	liver
GDS1663_tissue_2_3_mod.txt	GEO	GDS1663	1.96758693181	Homo sapiens	Expression data from different research centers	tissue	liver	spleen
GDS3113_tissue_9_28_mod.txt	GEO	GDS3113	1.01686459396	Homo sapiens	Various normal tissues	tissue	heart	thyroid
GDS1608_tissue_3_5_mod.txt	GEO	GDS1608	2.29445272003	Rattus norvegicus	Cocaine addiction effect on reward-related brain regions	tissue	medial prefrontal cortex	septum
E-GEOD-26104_39_2_3_mod.txt	ArrayExpress	E-GEOD-26104	-2.00154438079	Homo sapiens	Search for specific biomarkers of IFN-beta bioactivity in patients with MS	FactorValue..AGE.	35	36
E-GEOD-24207_47_12_15_mod.txt	ArrayExpress	E-GEOD-24207	-3.53926011848	Mus musculus	mRNA analysis in different mouse tissues	FactorValue..TISSUE.	muscle	pancreatic islets
GDS3113_tissue_1_25_mod.txt	GEO	GDS3113	1.06759326996	Homo sapiens	Various normal tissues	tissue	adrenal gland	spleen
E-GEOD-7392_35_1_2_mod.txt	ArrayExpress	E-GEOD-7392	1.2703184281	Homo sapiens	Transcription profiling by array of human fibrotic renal allografts	Factor.Value.time.	0	12
E-GEOD-24207_47_7_13_mod.txt	ArrayExpress	E-GEOD-24207	1.57760277875	Mus musculus	mRNA analysis in different mouse tissues	FactorValue..TISSUE.	heart	ovary
GDS589_tissue_5_10_mod.txt	GEO	GDS589	5.47499155298	Rattus norvegicus	Multiple normal tissue gene expression across strains	tissue	cerebral cortex	endothelial cells
GDS2819_individual_18_20_mod.txt	GEO	GDS2819	1.5457738144	Homo sapiens	Leukemic white blood cells and various RNA preparation protocols	individual	patient 25	patient 27
E-GEOD-13873_35_2_3_mod.txt	ArrayExpress	E-GEOD-13873	-1.58303542339	Mus musculus	Expression data from murine gastric epithelium	FactorValue..PATHOLOGY.	hyperplasia	metaplasia
E-MEXP-70_31_1_2_mod.txt	ArrayExpress	E-MEXP-70	1.94521747942	Homo sapiens	Transcription profiling by array of human primary CD30+/CD38lo cells differentiating along the megakaryocyte lineage	FactorValue.CELL.TYPE.	culture-derived megakaryocytes	hematopoietic progenitor cells
GDS3113_tissue_13_14_mod.txt	GEO	GDS3113	1.07497126741	Homo sapiens	Various normal tissues	tissue	mammary gland	ovary
GDS3113_tissue_20_26_mod.txt	GEO	GDS3113	1.31923874555	Homo sapiens	Various normal tissues	tissue	salivary gland	testis
GDS3142_tissue_5_19_mod.txt	GEO	GDS3142	-1.14315226851	Mus musculus	Various tissues	tissue	diaphragm	small intestine
E-GEOD-18680_37_2_3_mod.txt	ArrayExpress	E-GEOD-18680	1.03896094893	Homo sapiens	Gene expression profile of human ovarian cancer cell lines in vitro	FactorValue..CELL.LINE.	parental SKOV	parental T112D
E-GEOD-21293_24_1_2_mod.txt	ArrayExpress	E-GEOD-21293	-1.48927657637	Homo sapiens	Periostin, a cell adhesion molecule, facilitates invasion in the tumor microenvironment and annotates a novel tumor invasive signature in esophageal cancer	Factor.Value..ENGINEERED.ESCC.	invading (invasive)	non-invading
E-TABM-1108_31_3_6_mod.txt	ArrayExpress	E-TABM-1108	2.07762151208	Mus musculus	Evaluation of methylmercury on neural development in Embryonic Stem Cell Differentiation Cultures	Factor.Value..TIME.	4	7
E-GEOD-36820_43_1_2_mod.txt	ArrayExpress	E-GEOD-36820	-1.90532419103	Homo sapiens	Expression data from ACC xenografts and normal salivary glands	FactorValue..ORGANISM.PART.	adenoid cystic carcinoma grown as xenograft tumor	non-neoplastic salivary gland
GDS3142_tissue_6_8_mod.txt	GEO	GDS3142	2.14446349902	Mus musculus	Various tissues	tissue	embryonic stem cells	fetus
GDS3142_tissue_8_19_mod.txt	GEO	GDS3142	-3.02403116465	Mus musculus	Various tissues	tissue	fetus	small intestine
E-GEOD-17825_36_1_3_mod.txt	ArrayExpress	E-GEOD-17825	1.74013745559	Mus musculus	Murine fracture healing	FactorValue..INJURY.	1 day post fracture	5 days post fracture
GDS3256_cell.type_1_2_mod.txt	GEO	GDS3256	-3.97334362915	Homo sapiens	Metaphase II stage oocytes matured in vivo	cell.type	control	oocyte
GDS3113_tissue_7_31_mod.txt	GEO	GDS3113	2.51631827568	Homo sapiens	Various normal tissues	tissue	fetal liver	Universal Human Reference RNA
GDS3142_tissue_9_11_mod.txt	GEO	GDS3142	-3.21248400829	Mus musculus	Various tissues	tissue	heart	liver
GDS1975_cell.type_3_4_mod.txt	GEO	GDS1975	1.03531375388	Homo sapiens	Gliomas of grades III and IV (HG-U133A)	cell.type	anaplastic oligodendroglioma	glioblastoma
GDS3142_tissue_14_20_mod.txt	GEO	GDS3142	-1.30727029452	Mus musculus	Various tissues	tissue	ovary	spleen
GDS3516_disease.state_4_6_mod.txt	GEO	GDS3516	-2.19440532943	Homo sapiens	Nodular lymphocyte-predominant Hodgkin lymphoma: lymphocytic and histiocytic cells	disease.state	follicular lymphoma	normal centroblasts
GDS3142_tissue_6_12_mod.txt	GEO	GDS3142	1.5399724045	Mus musculus	Various tissues	tissue	embryonic stem cells	lung
E-GEOD-24207_47_7_16_mod.txt	ArrayExpress	E-GEOD-24207	-3.14017506094	Mus musculus	mRNA analysis in different mouse tissues	FactorValue..TISSUE.	heart	pituitary gland
GDS3113_tissue_4_15_mod.txt	GEO	GDS3113	-1.17130569991	Homo sapiens	Various normal tissues	tissue	colon	pancreas
E-GEOD-24207_47_13_20_mod.txt	ArrayExpress	E-GEOD-24207	-3.22296886457	Mus musculus	mRNA analysis in different mouse tissues	FactorValue..TISSUE.	ovary	small intestine
E-GEOD-20854_30_1_2_mod.txt	ArrayExpress	E-GEOD-20854	8.09893769534	Homo sapiens	Transcription profiling by array of human endometrial cancer cells after treatment with epidermal growth factor or gefitinib	Factor.Value..disease.state.	type I endometrial adenocarcinoma	type II endometrial adenocarcinoma
E-GEOD-32966_37_1_7_mod.txt	ArrayExpress	E-GEOD-32966	-1.54348809209	Mus musculus	Dermal reprogramming through epidermal activation of beta-catenin	FactorValue..SORTED.CELL.POPULATION.	GFP+ neonatal dermal fibroblasts	ItgA6+ telogen epidermal keratinocytes
E-TABM-672_24_3_9_mod.txt	ArrayExpress	E-TABM-672	4.45755088054	Mus musculus	Transcription profiling of mouse embyronic stem cell line CGR8 during the first 10 days of differentiation into embryoid bodies	Factor.Value..Age.	2	10
GDS3113_tissue_2_15_mod.txt	GEO	GDS3113	-2.62675850694	Homo sapiens	Various normal tissues	tissue	bone marrow	pancreas
GDS181_tissue_25_33_mod.txt	GEO	GDS181	1.47078324557	Homo sapiens	Large-scale analysis of the human transcriptome (HG-U95A)	tissue	prostate	THY+
GDS3491_genotype_variation_3_4_mod.txt	GEO	GDS3491	2.30966059794	Mus musculus	Aire ectopic expression effect on pancreatic islet beta cells	genotype_variation	transgenic Aire overexpressor	wild type
GDS3113_tissue_7_14_mod.txt	GEO	GDS3113	3.26988539251	Homo sapiens	Various normal tissues	tissue	fetal liver	ovary
GDS181_tissue_15_33_mod.txt	GEO	GDS181	2.17302183382	Homo sapiens	Large-scale analysis of the human transcriptome (HG-U95A)	tissue	kidney	THY+
E-GEOD-15904_24_6_8_mod.txt	ArrayExpress	E-GEOD-15904	1.09299627804	Mus musculus	Transcription profiling by array of mouse mammary tumors	Factor.Value..HISTOLOGICAL.SUBTYPE.	Papillary	Squamous
GDS3142_tissue_1_16_mod.txt	GEO	GDS3142	-1.92508511939	Mus musculus	Various tissues	tissue	adipose tissue	placenta
GDS589_tissue_4_8_mod.txt	GEO	GDS589	-1.19050889775	Rattus norvegicus	Multiple normal tissue gene expression across strains	tissue	cerebellum	dorsal root ganglion
E-GEOD-15904_24_2_3_mod.txt	ArrayExpress	E-GEOD-15904	-3.60061651195	Mus musculus	Transcription profiling by array of mouse mammary tumors	Factor.Value..HISTOLOGICAL.SUBTYPE.	EMT	Microacinar
GDS2819_individual_21_26_mod.txt	GEO	GDS2819	3.24638005523	Homo sapiens	Leukemic white blood cells and various RNA preparation protocols	individual	patient 3	patient 8
GDS1629_protocol_3_5_mod.txt	GEO	GDS1629	-2.79691926194	Rattus norvegicus	Immortalized suprachiasmatic nucleus cell line across circadian cycles: time course	protocol	biological replicate 3	technical replicate 2
GDS3113_tissue_3_22_mod.txt	GEO	GDS3113	1.41741784581	Homo sapiens	Various normal tissues	tissue	brain	skin
E-GEOD-24207_47_6_9_mod.txt	ArrayExpress	E-GEOD-24207	-3.54766961019	Mus musculus	mRNA analysis in different mouse tissues	FactorValue..TISSUE.	eye	kidney
E-GEOD-23583_50_1_9_mod.txt	ArrayExpress	E-GEOD-23583	-1.21599288725	Homo sapiens	Highly efficient reprogramming to pluripotency and directed differentiation using synthetic mRNA	FactorValue..CELL.TYPE.	BJ fibroblast	not specified
GDS1522_tissue_1_3_mod.txt	GEO	GDS1522	4.6848181957	Mus musculus	Forebrain neuronal subtypes	tissue	amygdala	cingulate cortex homogenate
E-GEOD-23114_37_1_2_mod.txt	ArrayExpress	E-GEOD-23114	-1.80259372143	Mus musculus	Cell cyclin kinase inhibitor Cdkn2c regulates B cell homeostasis and function in the NZM2410-derived murine lupus susceptibility locus Sle2c1	FactorValue..CELL.TYPE.	B1a	Bs
GDS2664_time_2_3_mod.txt	GEO	GDS2664	-1.4286488277	Rattus norvegicus	Peripheral nerve injury effect on dorsal root ganglion: time course	time	21 d	50 d
GDS3113_tissue_17_27_mod.txt	GEO	GDS3113	-1.21862118435	Homo sapiens	Various normal tissues	tissue	placenta	thymus
GDS2819_individual_13_19_mod.txt	GEO	GDS2819	1.70409187765	Homo sapiens	Leukemic white blood cells and various RNA preparation protocols	individual	patient 20	patient 26
GDS2671_time_5_10_mod.txt	GEO	GDS2671	4.14537430702	Mus musculus	Embryonic V6.5 stem cell differentiation in vitro (MG-430A)	time	24 h	7 d
E-GEOD-21515_27_4_6_mod.txt	ArrayExpress	E-GEOD-21515	1.23344056526	Mus musculus	Expression data from mouse ES and iPS cells	Factor.Value..CELL.LINE.	IP20D-3	R1
E-GEOD-21137_25_2_3_mod.txt	ArrayExpress	E-GEOD-21137	-2.02117674235	Mus musculus	Ultrastructural and transcriptional profiling of neuropathological misregulation of CREB function	Factor.Value..GENOTYPE.VARIATION.	tetO-VP16-CREB C57BL/6J	WT
GDS968_individual_9_40_mod.txt	GEO	GDS968	-3.25610807464	Homo sapiens	Radiation therapy toxicity association with abnormal transcriptional response to DNA damage	individual	NoCa3	RadS7
GDS3142_tissue_3_18_mod.txt	GEO	GDS3142	-2.1140897692	Mus musculus	Various tissues	tissue	bone marrow	seminal vesicle
GDS2819_individual_4_18_mod.txt	GEO	GDS2819	-1.44260097556	Homo sapiens	Leukemic white blood cells and various RNA preparation protocols	individual	patient 12	patient 25
E-GEOD-20524_31_2_4_mod.txt	ArrayExpress	E-GEOD-20524	-1.82315452232	Mus musculus	Blood Gene Expression Signatures Predict Invasive Candidiasis	Factor.Value..INFECTION.DURATION..DAYS..	2	4
E-GEOD-22533_30_1_2_mod.txt	ArrayExpress	E-GEOD-22533	1.65861831729	Homo sapiens	Breast cancer cells resistant to hormone deprivation maintain an estrogen receptor alpha-dependent, E2F-directed transcriptional program	FactorValue..CELL.LINE.	HCC-1428/LTED	MCF-7/LTED
GDS3113_tissue_7_22_mod.txt	GEO	GDS3113	2.89606914292	Homo sapiens	Various normal tissues	tissue	fetal liver	skin
E-GEOD-24207_47_4_11_mod.txt	ArrayExpress	E-GEOD-24207	4.04772475113	Mus musculus	mRNA analysis in different mouse tissues	FactorValue..TISSUE.	brain	lung
GDS3113_tissue_6_7_mod.txt	GEO	GDS3113	-1.92756140376	Homo sapiens	Various normal tissues	tissue	fetal kidney	fetal liver
GDS3142_tissue_7_15_mod.txt	GEO	GDS3142	-3.86318435209	Mus musculus	Various tissues	tissue	eye	pituitary gland
E-GEOD-23994_24_1_2_mod.txt	ArrayExpress	E-GEOD-23994	3.33007426178	Homo sapiens	A molecular signature of normal breast epithelial and stromal cells from Li-Fraumeni syndrome mutation carriers	Factor.Value..CELL.TYPE.	epithelial	stromal
E-GEOD-24547_44_1_2_mod.txt	ArrayExpress	E-GEOD-24547	-9.08595627287	Homo sapiens	Transcriptional pathway signatures for the Aurora inhibitor Danusertib	FactorValue..CELL.LINE.	A2780	COLO205
GDS1608_tissue_3_6_mod.txt	GEO	GDS1608	2.0245756428	Rattus norvegicus	Cocaine addiction effect on reward-related brain regions	tissue	medial prefrontal cortex	ventral tegmental area
E-GEOD-24207_47_11_12_mod.txt	ArrayExpress	E-GEOD-24207	-1.81430231912	Mus musculus	mRNA analysis in different mouse tissues	FactorValue..TISSUE.	lung	muscle
GDS589_tissue_5_6_mod.txt	GEO	GDS589	1.40370937502	Rattus norvegicus	Multiple normal tissue gene expression across strains	tissue	cerebral cortex	cornea
GDS3142_tissue_8_18_mod.txt	GEO	GDS3142	-3.06583099108	Mus musculus	Various tissues	tissue	fetus	seminal vesicle
E-GEOD-22381_40_1_2_mod.txt	ArrayExpress	E-GEOD-22381	-3.70200183149	Mus musculus	Identification of downstream transcriptional targets of Dlx5 during early mouse inner ear (otocyst/otic vesicle) development	FactorValue..TISSUE.	2B1 cell line	inner ear
E-GEOD-24207_47_3_23_mod.txt	ArrayExpress	E-GEOD-24207	-1.25301655807	Mus musculus	mRNA analysis in different mouse tissues	FactorValue..TISSUE.	bone marrow	thymus
GDS1663_tissue_2_4_mod.txt	GEO	GDS1663	2.0549195214	Homo sapiens	Expression data from different research centers	tissue	liver	universal RNA
E-GEOD-21419_36_3_4_mod.txt	ArrayExpress	E-GEOD-21419	1.22611164827	Mus musculus	Laser Capture Microdissection of Hyperlipidemic Mouse Aorta Atherosclerosis	FactorValue..ORGANISM.PART.	adventitia with ATLO of abdominal aorta within atherosclerotic lesion area	atherosclerotic lesion of abdominal aorta
E-GEOD-24207_47_13_15_mod.txt	ArrayExpress	E-GEOD-24207	-5.01533824369	Mus musculus	mRNA analysis in different mouse tissues	FactorValue..TISSUE.	ovary	pancreatic islets
GDS3142_tissue_4_22_mod.txt	GEO	GDS3142	2.55120665183	Mus musculus	Various tissues	tissue	brain	thymus
E-GEOD-22139_36_2_4_mod.txt	ArrayExpress	E-GEOD-22139	-1.03865562324	Homo sapiens	Bone morphogenetic protein-7 is a MYC target with pro-survival functions in childhood medulloblastoma	FactorValue..CELL.LINE.	DAOY M14	DAOY V11
GDS3113_tissue_5_31_mod.txt	GEO	GDS3113	1.65929856966	Homo sapiens	Various normal tissues	tissue	fetal brain	Universal Human Reference RNA
GDS181_tissue_13_25_mod.txt	GEO	GDS181	3.24730184017	Homo sapiens	Large-scale analysis of the human transcriptome (HG-U95A)	tissue	HL60	prostate
E-GEOD-33134_32_1_3_mod.txt	ArrayExpress	E-GEOD-33134	1.76236349257	Mus musculus	Protective gene expression changes elicited by an inherited defect in photoreceptor structure.	FactorValue..AGE.	post natal day 14	post natal day 6
GDS2666_time_3_4_mod.txt	GEO	GDS2666	-1.62923646207	Mus musculus	Embryonic R1 stem cell differentiation in vitro (MG-430A)	time	14 d	18 h
E-GEOD-24207_47_6_12_mod.txt	ArrayExpress	E-GEOD-24207	-1.21487191145	Mus musculus	mRNA analysis in different mouse tissues	FactorValue..TISSUE.	eye	muscle
GDS509_time_4_6_mod.txt	GEO	GDS509	-1.12407234063	Rattus norvegicus	Fracture healing timecourse and the effect of age	time	4 week post_fracture	pre-fracture
E-GEOD-27973_41_1_2_mod.txt	ArrayExpress	E-GEOD-27973	-2.90367424569	Homo sapiens	Human airway epithelial responses to rhinovirus infection and cigarette smoke extract alone and in combination	FactorValue..DONOR.	1	2
E-GEOD-24210_45_1_2_mod.txt	ArrayExpress	E-GEOD-24210	3.67943168405	Mus musculus	Interleukin-35-mediated induction of a novel regulatory T cell population	FactorValue..CELL.TYPE.	CD4+/CD45RBhi T conventional cells	CD4+/CD45RBhi/CD25- T conventional cells
GDS3113_tissue_21_31_mod.txt	GEO	GDS3113	2.41028521622	Homo sapiens	Various normal tissues	tissue	skeletal muscle	Universal Human Reference RNA
GDS3135_tissue_1_2_mod.txt	GEO	GDS3135	-3.90490227083	Rattus norvegicus	Brown adipose tissue response to fasting	tissue	brown adipose tissue	liver
GDS3068_cell.type_1_2_mod.txt	GEO	GDS3068	5.82286806906	Homo sapiens	Primary hepatocytes and HepG2 liver cells response to various fluoroquinolones	cell.type	HepG2	primary hepatocyte
GDS3142_tissue_10_21_mod.txt	GEO	GDS3142	1.60783283774	Mus musculus	Various tissues	tissue	kidney	testis
E-TABM-865_25_1_2_mod.txt	ArrayExpress	E-TABM-865	3.56673903891	Mus musculus	Transcription profiling of mouse liver and spleen from strains that are susceptible and tolerant to trypanosome infection	Factor.Value..OrganismPart.	liver	spleen
E-GEOD-21576_37_1_2_mod.txt	ArrayExpress	E-GEOD-21576	1.75628707722	Mus musculus	Expression profiles of laser dissected colon tumor samples of wild-type mice and vil-Cre-Bcl9-/-/Bcl9l-/- mice	FactorValue..GENOTYPE.	vil-Cre-Bcl9-/-/Bcl9l-/-	wildtype
E-GEOD-24207_47_8_11_mod.txt	ArrayExpress	E-GEOD-24207	8.63295187321	Mus musculus	mRNA analysis in different mouse tissues	FactorValue..TISSUE.	insulinoma	lung
E-GEOD-15543_31_2_3_mod.txt	ArrayExpress	E-GEOD-15543	1.56989609761	Homo sapiens	Transcription profiling by array of human pancreatic islet cells after in vitro expansion	Factor.Value.growth.condition.	freshly isolated cells	redifferentiated cell culture
GDS3113_tissue_15_31_mod.txt	GEO	GDS3113	2.77893389778	Homo sapiens	Various normal tissues	tissue	pancreas	Universal Human Reference RNA
E-GEOD-24207_47_8_15_mod.txt	ArrayExpress	E-GEOD-24207	4.31028183812	Mus musculus	mRNA analysis in different mouse tissues	FactorValue..TISSUE.	insulinoma	pancreatic islets
GDS2819_disease.state_3_5_mod.txt	GEO	GDS2819	3.10260837155	Homo sapiens	Leukemic white blood cells and various RNA preparation protocols	disease.state	ALL with t 12, 21	AML with t 11q23, MLL
GDS3113_tissue_7_16_mod.txt	GEO	GDS3113	1.49282980963	Homo sapiens	Various normal tissues	tissue	fetal liver	peripheral blood lymphocyte
E-GEOD-21278_33_2_11_mod.txt	ArrayExpress	E-GEOD-21278	-3.64094870023	Mus musculus	A genomic atlas of mouse hypothalamic development	Factor.Value..AGE.	embryonic day 11	postnatal day 21
E-GEOD-24637_42_1_3_mod.txt	ArrayExpress	E-GEOD-24637	-3.09373358871	Mus musculus	Genetic and genomic analysis of hyperlipidemia	FactorValue..TISSUE.	Adipose	muscle
GDS3113_tissue_15_18_mod.txt	GEO	GDS3113	1.47755367755	Homo sapiens	Various normal tissues	tissue	pancreas	prostate
GDS3068_other_1_2_mod.txt	GEO	GDS3068	6.17321391104	Homo sapiens	Primary hepatocytes and HepG2 liver cells response to various fluoroquinolones	other	cell line	donor A
GDS3142_tissue_4_18_mod.txt	GEO	GDS3142	2.10929905888	Mus musculus	Various tissues	tissue	brain	seminal vesicle
E-GEOD-13409_35_1_2_mod.txt	ArrayExpress	E-GEOD-13409	-1.59338092116	Mus musculus	Expression data of Na??ve Treg and Tumor associated Treg cells	FactorValue..GENOTYPE.	Foxp3-GFP KI, Ascites Treg cells were tumor-associated FoxP3-GFP+ cells sorted from the tumor ascites of 129/SvJ mice IP-injected with 1 x 106 RMAS cells 5 days earlier;	Foxp3-GFP KI, Spleen-T Treg cells were purified from the spleens of the same tumor-bearing mice.
GDS2038_cell.line_1_2_mod.txt	GEO	GDS2038	4.17566867455	Homo sapiens	Epstein-Barr virus nuclear antigen 2 activation	cell.line	BJABK3	BL41K3
E-GEOD-26408_33_5_8_mod.txt	ArrayExpress	E-GEOD-26408	5.49161981568	Mus musculus	Signatures of murine B-cell development implicate Yy1 as a regulator of the germinal center-specific program	FactorValue..CELL.TYPE.	Purified Plasma cells (B220-low/Cd138-positive/Cd93-negative)	Purified Pro-B (B220-positive/CD43-high/IgM-negative) B-cells
GDS2819_individual_18_26_mod.txt	GEO	GDS2819	3.36391982664	Homo sapiens	Leukemic white blood cells and various RNA preparation protocols	individual	patient 25	patient 8
GDS2664_time_1_3_mod.txt	GEO	GDS2664	-1.41745895932	Rattus norvegicus	Peripheral nerve injury effect on dorsal root ganglion: time course	time	14 d	50 d
GDS3113_tissue_19_25_mod.txt	GEO	GDS3113	-1.39349204585	Homo sapiens	Various normal tissues	tissue	retina	spleen
E-GEOD-25098_32_4_7_mod.txt	ArrayExpress	E-GEOD-25098	-2.42706804757	Mus musculus	Rhabdomyosarcoma can be initiated in activated Pax7+ Muscle Progenitor Cells	FactorValue..GENOTYPE.VARIATION.	Pax7-CreER; LSL-KrasG12D;Trp53Flox/Flox	Wild Type mice
GDS3113_tissue_4_32_mod.txt	GEO	GDS3113	1.88960720852	Homo sapiens	Various normal tissues	tissue	colon	uterus
E-GEOD-26104_39_3_5_mod.txt	ArrayExpress	E-GEOD-26104	2.78347997481	Homo sapiens	Search for specific biomarkers of IFN-beta bioactivity in patients with MS	FactorValue..AGE.	36	52
GDS3142_tissue_4_19_mod.txt	GEO	GDS3142	1.22260709329	Mus musculus	Various tissues	tissue	brain	small intestine
GDS3142_tissue_8_21_mod.txt	GEO	GDS3142	-2.79700272681	Mus musculus	Various tissues	tissue	fetus	testis
E-MEXP-2539_26_3_4_mod.txt	ArrayExpress	E-MEXP-2539	3.40804617254	Mus musculus	Transcription profiling in primary mouse hepatocytes discriminates between true and false genotoxic compounds	Factor.Value.COMPOUND.	4-NP	8Q
E-MEXP-2360_27_2_5_mod.txt	ArrayExpress	E-MEXP-2360	-2.1200484675	Homo sapiens	Transcription profiling of human memory B cells to plasma cells differentiation time course	Factor.Value.CELL_TYPE.	bone marrow plasma cells	plasma cells
E-GEOD-7540_25_7_10_mod.txt	ArrayExpress	E-GEOD-7540	-1.82298861166	Homo sapiens	Transcription profiling of brain samples from human and chimpanzee subjects	Factor.Value..OrganismPart.	hippocampus	superior temporal gyrus
GDS2385_tissue_1_2_mod.txt	GEO	GDS2385	4.80148470944	Rattus norvegicus	Targretin, 9-cis retinoic acid, and 4-hydroxyphenylretinamide effect on various organs	tissue	liver	lung
E-GEOD-33199_29_4_5_mod.txt	ArrayExpress	E-GEOD-33199	1.68330453457	Mus musculus	A mouse model of the most aggressive subgroup of human medulloblastoma [Mouse430 2]	FactorValue..VARIATION.	p53-/-, Cdkn2c-/- infected with hcMyc/GFP	p53-/-, Cdkn2c-/- infected with mMycn/GFP
E-GEOD-24207_47_1_21_mod.txt	ArrayExpress	E-GEOD-24207	-1.54633046344	Mus musculus	mRNA analysis in different mouse tissues	FactorValue..TISSUE.	adipose tissue	spleen
GDS3142_tissue_15_17_mod.txt	GEO	GDS3142	1.40709864273	Mus musculus	Various tissues	tissue	pituitary gland	salivary gland
GDS3113_tissue_17_26_mod.txt	GEO	GDS3113	-1.1568487049	Homo sapiens	Various normal tissues	tissue	placenta	testis
E-GEOD-17266_34_2_3_mod.txt	ArrayExpress	E-GEOD-17266	3.9101786756	Mus musculus	Expression data from B6C3F1 mice treated with baclofen	FactorValue..TISSUE.	Liver	Spleen
GDS3113_tissue_17_21_mod.txt	GEO	GDS3113	-2.59403734637	Homo sapiens	Various normal tissues	tissue	placenta	skeletal muscle
E-TABM-672_24_2_5_mod.txt	ArrayExpress	E-TABM-672	3.35921501467	Mus musculus	Transcription profiling of mouse embyronic stem cell line CGR8 during the first 10 days of differentiation into embryoid bodies	Factor.Value..Age.	1	4
E-GEOD-29848_38_4_6_mod.txt	ArrayExpress	E-GEOD-29848	1.28555127622	Mus musculus	Microarray data of differentiating embryonic stem cells overexpressing the transcription factor Msgn1	FactorValue..TREATMENT.	Day2 EBs induced with doxycycline and cultured for another 12h	Day2 EBs induced with doxycycline and cultured for another 48h
E-GEOD-30950_38_2_6_mod.txt	ArrayExpress	E-GEOD-30950	1.31893693387	Homo sapiens	Human Natural Killer Cell activation by mycobacteria	FactorValue..DONOR.	G2	K2
E-GEOD-15904_24_2_5_mod.txt	ArrayExpress	E-GEOD-15904	-3.12095434536	Mus musculus	Transcription profiling by array of mouse mammary tumors	Factor.Value..HISTOLOGICAL.SUBTYPE.	EMT	not specified
GDS3516_disease.state_5_6_mod.txt	GEO	GDS3516	-2.6987265112	Homo sapiens	Nodular lymphocyte-predominant Hodgkin lymphoma: lymphocytic and histiocytic cells	disease.state	nodular lymphocyte-predominant Hodgkin lymphoma	normal centroblasts
GDS3142_tissue_17_18_mod.txt	GEO	GDS3142	1.082648533	Mus musculus	Various tissues	tissue	salivary gland	seminal vesicle
GDS2819_individual_16_19_mod.txt	GEO	GDS2819	2.77623611941	Homo sapiens	Leukemic white blood cells and various RNA preparation protocols	individual	patient 23	patient 26
E-GEOD-15580_37_1_4_mod.txt	ArrayExpress	E-GEOD-15580	-3.72486017463	Mus musculus	Molecular Signatures of Fetal and Adult Prostate Stem Cells	FactorValue..CELL.TYPE.	FACS sorted Sca-1Hi-labelled cells of normal prostate	Urogenital sinus epithelium cells from embryos
E-GEOD-24207_47_18_23_mod.txt	ArrayExpress	E-GEOD-24207	1.38655698887	Mus musculus	mRNA analysis in different mouse tissues	FactorValue..TISSUE.	salivary gland	thymus
GDS181_tissue_13_14_mod.txt	GEO	GDS181	4.54885405666	Homo sapiens	Large-scale analysis of the human transcriptome (HG-U95A)	tissue	HL60	HUVEC
E-GEOD-30499_44_1_4_mod.txt	ArrayExpress	E-GEOD-30499	-2.19595953373	Homo sapiens	Inhibition of nonsense-mediated RNA decay by the tumor microenvironment promotes tumorigenesis	FactorValue..SAMPLING.TIME.POINT.	0 hr	4.5 hrs
E-TABM-672_24_2_8_mod.txt	ArrayExpress	E-TABM-672	3.9148026871	Mus musculus	Transcription profiling of mouse embyronic stem cell line CGR8 during the first 10 days of differentiation into embryoid bodies	Factor.Value..Age.	1	7
GDS3142_tissue_8_17_mod.txt	GEO	GDS3142	-3.0948919937	Mus musculus	Various tissues	tissue	fetus	salivary gland
E-GEOD-21749_32_1_2_mod.txt	ArrayExpress	E-GEOD-21749	-3.07532794247	Mus musculus	The ubiquitin-conjugating enzyme HR6B is required for maintenance of X chromosome silencing in mouse spermatocytes and spermatids	Factor.Value..CELL.TYPE.	late spermatocyte	round spermatid
E-GEOD-19534_34_1_2_mod.txt	ArrayExpress	E-GEOD-19534	-2.37510521554	Mus musculus	Alpha-synuclein deficiency affects brain Foxp1 expression and ultrasonic vocalization	FactorValue..ORGANISM.PART.	cerebellum	striatum
E-GEOD-24207_47_1_14_mod.txt	ArrayExpress	E-GEOD-24207	-6.77817558952	Mus musculus	mRNA analysis in different mouse tissues	FactorValue..TISSUE.	adipose tissue	pancreatic acini
E-GEOD-24207_47_3_10_mod.txt	ArrayExpress	E-GEOD-24207	-4.4802224495	Mus musculus	mRNA analysis in different mouse tissues	FactorValue..TISSUE.	bone marrow	liver
E-GEOD-32966_37_2_8_mod.txt	ArrayExpress	E-GEOD-32966	-2.54408583085	Mus musculus	Dermal reprogramming through epidermal activation of beta-catenin	FactorValue..SORTED.CELL.POPULATION.	GFP+ sustained activated D2 dermal fibroblasts	ItgA6+ transient activated D2 epidermal keratinocytes
E-GEOD-17880_36_1_2_mod.txt	ArrayExpress	E-GEOD-17880	-4.06503049123	Mus musculus	Expression data from B6C3F1 mice treated with 2-butoxyethanol and reduced oxygen	FactorValue..TISSUE.	Bone Marrow	Liver
GDS3113_tissue_5_32_mod.txt	GEO	GDS3113	1.94127758031	Homo sapiens	Various normal tissues	tissue	fetal brain	uterus
E-GEOD-35766_32_1_3_mod.txt	ArrayExpress	E-GEOD-35766	3.21749860512	Mus musculus	Identification of the cortical neurons that mediate antidepressant responses	FactorValue..LINE.	DU9	ES691/p11 KO
E-GEOD-24207_47_8_13_mod.txt	ArrayExpress	E-GEOD-24207	8.83042972078	Mus musculus	mRNA analysis in different mouse tissues	FactorValue..TISSUE.	insulinoma	ovary
E-GEOD-23009_38_3_4_mod.txt	ArrayExpress	E-GEOD-23009	-1.48243014792	Mus musculus	Effect of intra-cytoplasmic sperm injection (ICSI) on gene expression and development of mouse preimplantation embryos	FactorValue..GROUP.	ICSI embryos cultured in WM	IVF embryos cultured in WM
E-GEOD-30950_38_2_5_mod.txt	ArrayExpress	E-GEOD-30950	1.58785088413	Homo sapiens	Human Natural Killer Cell activation by mycobacteria	FactorValue..DONOR.	G2	J2
GDS3113_tissue_19_24_mod.txt	GEO	GDS3113	-1.00581595308	Homo sapiens	Various normal tissues	tissue	retina	spinal cord
GDS3113_tissue_15_26_mod.txt	GEO	GDS3113	1.80583732303	Homo sapiens	Various normal tissues	tissue	pancreas	testis
GDS1490_tissue_6_29_mod.txt	GEO	GDS1490	-1.33733112401	Mus musculus	Neural tissue profiling	tissue	cerebral cortex	spleen
GDS3113_tissue_10_31_mod.txt	GEO	GDS3113	1.55457232055	Homo sapiens	Various normal tissues	tissue	kidney	Universal Human Reference RNA
E-GEOD-24207_47_2_12_mod.txt	ArrayExpress	E-GEOD-24207	1.79316551574	Mus musculus	mRNA analysis in different mouse tissues	FactorValue..TISSUE.	adrenal gland	muscle
E-GEOD-32966_37_3_7_mod.txt	ArrayExpress	E-GEOD-32966	-1.68169530186	Mus musculus	Dermal reprogramming through epidermal activation of beta-catenin	FactorValue..SORTED.CELL.POPULATION.	GFP+ telogen dermal fibroblasts	ItgA6+ telogen epidermal keratinocytes
GDS3142_tissue_21_22_mod.txt	GEO	GDS3142	1.08280653134	Mus musculus	Various tissues	tissue	testis	thymus
GDS3113_tissue_8_12_mod.txt	GEO	GDS3113	1.85737448662	Homo sapiens	Various normal tissues	tissue	fetal thymus	lung
E-GEOD-15543_32_1_2_mod.txt	ArrayExpress	E-GEOD-15543	1.38966905158	Homo sapiens	Transcription profiling by array of human pancreatic islet cells after in vitro expansion	Factor.Value.protocol.		expansion protocol: NIH
GDS3113_tissue_1_32_mod.txt	GEO	GDS3113	1.77277346843	Homo sapiens	Various normal tissues	tissue	adrenal gland	uterus
E-GEOD-24207_47_8_21_mod.txt	ArrayExpress	E-GEOD-24207	8.23729339187	Mus musculus	mRNA analysis in different mouse tissues	FactorValue..TISSUE.	insulinoma	spleen
GDS1017_shock_1_2_mod.txt	GEO	GDS1017	1.85716012643	Mus musculus	Hypoxic-ischemic injury response to erythropoietin pretreatment	shock	control	hypoxic-ischemic injury
GDS3142_tissue_1_10_mod.txt	GEO	GDS3142	-4.26733915782	Mus musculus	Various tissues	tissue	adipose tissue	kidney
GDS3113_tissue_7_25_mod.txt	GEO	GDS3113	2.09311708787	Homo sapiens	Various normal tissues	tissue	fetal liver	spleen
GDS2159_time_3_5_mod.txt	GEO	GDS2159	-1.04451217987	Mus musculus	Spinal cord injury model: time course	time	24 h	4 h
E-GEOD-24207_47_11_15_mod.txt	ArrayExpress	E-GEOD-24207	-4.9730414863	Mus musculus	mRNA analysis in different mouse tissues	FactorValue..TISSUE.	lung	pancreatic islets
E-GEOD-32386_33_2_3_mod.txt	ArrayExpress	E-GEOD-32386	-2.27493249696	Mus musculus	Expression profiling of murine neuroblastoma in transgenic mice	FactorValue..GENOTYPE.	transgenic for neural crest-specific expression of mutated ALK	transgenic for neural crest-specific expression of MYCN
E-GEOD-18680_37_1_4_mod.txt	ArrayExpress	E-GEOD-18680	2.09647447044	Homo sapiens	Gene expression profile of human ovarian cancer cell lines in vitro	FactorValue..CELL.LINE.	parental IGROV	parental TOV21G
GDS3113_tissue_9_19_mod.txt	GEO	GDS3113	1.82275911771	Homo sapiens	Various normal tissues	tissue	heart	retina
GDS3113_tissue_16_20_mod.txt	GEO	GDS3113	-1.26884685425	Homo sapiens	Various normal tissues	tissue	peripheral blood lymphocyte	salivary gland
E-GEOD-22865_37_1_2_mod.txt	ArrayExpress	E-GEOD-22865	6.65503429706	Homo sapiens	CHAC1 mRNA expression is a strong prognostic biomarker in breast and ovarian cancer	FactorValue..CELL.LINE.	BT-20	HS578T
E-GEOD-24207_47_2_6_mod.txt	ArrayExpress	E-GEOD-24207	2.7610114464	Mus musculus	mRNA analysis in different mouse tissues	FactorValue..TISSUE.	adrenal gland	eye
GDS2819_individual_4_19_mod.txt	GEO	GDS2819	1.00531574967	Homo sapiens	Leukemic white blood cells and various RNA preparation protocols	individual	patient 12	patient 26
E-TABM-672_24_4_8_mod.txt	ArrayExpress	E-TABM-672	2.57154854037	Mus musculus	Transcription profiling of mouse embyronic stem cell line CGR8 during the first 10 days of differentiation into embryoid bodies	Factor.Value..Age.	3	7
GDS3113_tissue_11_17_mod.txt	GEO	GDS3113	3.19262016682	Homo sapiens	Various normal tissues	tissue	liver	placenta
E-GEOD-21278_33_2_7_mod.txt	ArrayExpress	E-GEOD-21278	-1.3543278443	Mus musculus	A genomic atlas of mouse hypothalamic development	Factor.Value..AGE.	embryonic day 11	embryonic day 16
GDS3516_disease.state_4_10_mod.txt	GEO	GDS3516	-1.22134952525	Homo sapiens	Nodular lymphocyte-predominant Hodgkin lymphoma: lymphocytic and histiocytic cells	disease.state	follicular lymphoma	normal plasma cells
E-GEOD-22787_37_3_4_mod.txt	ArrayExpress	E-GEOD-22787	-7.34621303737	Homo sapiens	Affymetrix HG-U133A 2.0 Expression data	FactorValue..GENOTYPE.VARIATION.	NRAS Q61R mutation	wild type BRAF, NRAS, and CDKN2A
GDS2604_cell.line_2_3_mod.txt	GEO	GDS2604	2.06530702684	Homo sapiens	Asbestos effect on epithelial and mesothelial lung cell lines: time course	cell.line	Beas2B	Met5A
E-GEOD-20524_31_1_2_mod.txt	ArrayExpress	E-GEOD-20524	1.66636116626	Mus musculus	Blood Gene Expression Signatures Predict Invasive Candidiasis	Factor.Value..INFECTION.DURATION..DAYS..	1	2
GDS1054_age_1_2_mod.txt	GEO	GDS1054	1.6896668715	Rattus norvegicus	Iron deficiency effect on duodenum: time course (RAE230A)	age	12 wk	21 d
GDS3142_tissue_10_17_mod.txt	GEO	GDS3142	1.2442041933	Mus musculus	Various tissues	tissue	kidney	salivary gland
E-GEOD-17184_38_2_4_mod.txt	ArrayExpress	E-GEOD-17184	1.30869458356	Mus musculus	ConA-induced fulminant hepatitis in a mouse model	FactorValue..TIME.POINT.	1 hr	6 hr
E-GEOD-24207_47_12_16_mod.txt	ArrayExpress	E-GEOD-24207	-3.24169971448	Mus musculus	mRNA analysis in different mouse tissues	FactorValue..TISSUE.	muscle	pituitary gland
GDS3113_tissue_12_26_mod.txt	GEO	GDS3113	-1.44506869256	Homo sapiens	Various normal tissues	tissue	lung	testis
E-GEOD-18649_37_1_2_mod.txt	ArrayExpress	E-GEOD-18649	2.48815327122	Mus musculus	Molecular Profiling of the Developing Axial Skeleton: A role for Tgfbr2 in the Development of the Intervertebral Disc.	FactorValue..TISSUE.	Intervertebral disc (IVD)	not specified
GDS3516_disease.state_6_11_mod.txt	GEO	GDS3516	2.07577344724	Homo sapiens	Nodular lymphocyte-predominant Hodgkin lymphoma: lymphocytic and histiocytic cells	disease.state	normal centroblasts	T-cell rich B-cell lymphoma
E-GEOD-8167_37_1_2_mod.txt	ArrayExpress	E-GEOD-8167	1.71554009647	Homo sapiens	Transcription profiling by array of human gastrointestinal stromal tumors with KIT mutations	Factor.Value.GENOTYPE.	KIT mutation: Exon 11	KIT mutation: Exon 9
E-GEOD-20244_37_2_5_mod.txt	ArrayExpress	E-GEOD-20244	-2.89622424375	Mus musculus	A comprehensive methylome map of lineage commitment from hematopoietic progenitors	FactorValue..PROGENITOR.POPULATION.	CMP	DN3
GDS3142_tissue_3_15_mod.txt	GEO	GDS3142	-3.05852734046	Mus musculus	Various tissues	tissue	bone marrow	pituitary gland
GDS3113_tissue_16_31_mod.txt	GEO	GDS3113	1.02348846605	Homo sapiens	Various normal tissues	tissue	peripheral blood lymphocyte	Universal Human Reference RNA
E-TABM-1091_29_1_4_mod.txt	ArrayExpress	E-TABM-1091	1.22260865161	Homo sapiens	Transcriptiion profiling by array of human ratiometric mixes of high quality RNA from different tissues using different labeling protocols to provide a mechanism for assessing process improvement	Factor.Value..MIX.	Human Brain Reference RNA	Mix2
E-GEOD-37566_37_1_4_mod.txt	ArrayExpress	E-GEOD-37566	-1.36132625074	Mus musculus	Dendritic cell and monocyte progenitors	FactorValue..CELL.TYPE.	committed dendritic cell precursors (pre-DCs)	Macrophage & Dendritic cell Progenitors (MDPs)
E-GEOD-22606_37_1_2_mod.txt	ArrayExpress	E-GEOD-22606	1.06817127787	Homo sapiens	Identification of an SRF- and androgen-dependent gene signature in prostate cancer	FactorValue..SIRNA.TRANSFECTION.PROTOCOL.	control siRNA	SRF Silencing
E-GEOD-29625_64_1_2_mod.txt	ArrayExpress	E-GEOD-29625	-1.49578666544	Homo sapiens	Human embryonic stem cells derived from embryos at different stages of development share similar transcription profiles	FactorValue..BIOSOURCEPROVIDER.	Clontech, Mountain View, CA, USA.	StemLifeLine Inc.
GDS3142_tissue_12_13_mod.txt	GEO	GDS3142	-1.43645251398	Mus musculus	Various tissues	tissue	lung	muscle
E-GEOD-20614_35_1_2_mod.txt	ArrayExpress	E-GEOD-20614	-1.51578167024	Mus musculus	Gene expression profiling of mouse tumors arising from Keratin 6-positive mammary cells	FactorValue..TRANSGENIC.	K6-tva RCAS-PyMT	MMTV-PyMT
E-GEOD-20033_27_1_7_mod.txt	ArrayExpress	E-GEOD-20033	-1.21702899081	Homo sapiens	Minicircle-derived iPS cells - Affymetrix Data	Factor.Value..CELL.TYPE.	adipose stem cells derived from adult human donor	iPS cells from episomal vectors (Defined Factor sub-clone)
GDS2158_time_1_3_mod.txt	GEO	GDS2158	1.24421619589	Mus musculus	Emery-Dreifuss muscular dystrophy model: regenerating skeletal muscle	time	0 d	4 d
E-GEOD-13873_35_4_5_mod.txt	ArrayExpress	E-GEOD-13873	-7.07749324366	Mus musculus	Expression data from murine gastric epithelium	FactorValue..PATHOLOGY.	n/a	none
GDS1695_cell.type_1_3_mod.txt	GEO	GDS1695	2.33165912083	Mus musculus	Self-renewing memory B cell	cell.type	germinal center B cells	naive B cells
E-GEOD-25098_32_1_7_mod.txt	ArrayExpress	E-GEOD-25098	-2.44432508672	Mus musculus	Rhabdomyosarcoma can be initiated in activated Pax7+ Muscle Progenitor Cells	FactorValue..GENOTYPE.VARIATION.	LSL-KrasG12D;Trp53Flox/Flox	Wild Type mice
GDS3113_tissue_10_19_mod.txt	GEO	GDS3113	2.52486317858	Homo sapiens	Various normal tissues	tissue	kidney	retina
GDS3142_tissue_3_21_mod.txt	GEO	GDS3142	-1.84526150492	Mus musculus	Various tissues	tissue	bone marrow	testis
GDS3113_tissue_21_26_mod.txt	GEO	GDS3113	1.43718864148	Homo sapiens	Various normal tissues	tissue	skeletal muscle	testis
E-TABM-1091_29_2_5_mod.txt	ArrayExpress	E-TABM-1091	1.31360710477	Homo sapiens	Transcriptiion profiling by array of human ratiometric mixes of high quality RNA from different tissues using different labeling protocols to provide a mechanism for assessing process improvement	Factor.Value..MIX.	liver only	skeletal muscle only
E-GEOD-19650_38_1_4_mod.txt	ArrayExpress	E-GEOD-19650	4.05482271698	Homo sapiens	Expression data from epithelial cells during the process of multistep pancreatic carcinogenesis	FactorValue..DISEASE.STATUS.	intraductal papillary-mucinous adenoma (IPMA)	normal
E-GEOD-25119_42_1_2_mod.txt	ArrayExpress	E-GEOD-25119	-2.57155905806	Homo sapiens	Comparison of CD4+ T cells from human fetal and adult donors	FactorValue..CELL.TYPE.	Sort Purifed Thymocytes	Sort Purified T cells
E-GEOD-24207_47_11_14_mod.txt	ArrayExpress	E-GEOD-24207	-6.01303679342	Mus musculus	mRNA analysis in different mouse tissues	FactorValue..TISSUE.	lung	pancreatic acini
GDS3233_disease.state_1_2_mod.txt	GEO	GDS3233	3.2515977969	Homo sapiens	Cervical cancer tumorigenesis	disease.state	cervical cancer cell line	cervical cancer primary tumor
E-GEOD-38754_39_2_3_mod.txt	ArrayExpress	E-GEOD-38754	3.24430699513	Mus musculus	Temporal changes of gene expression in mouse heart	FactorValue..ORGANISM.PART.	kidney	lung
GDS565_tissue_1_4_mod.txt	GEO	GDS565	2.48993200072	Mus musculus	Sex specific transcription in somatic and reproductive tissues	tissue	hypothalamus	ovary
GDS3113_tissue_10_24_mod.txt	GEO	GDS3113	1.5190472255	Homo sapiens	Various normal tissues	tissue	kidney	spinal cord
GDS3113_tissue_7_32_mod.txt	GEO	GDS3113	2.79829728634	Homo sapiens	Various normal tissues	tissue	fetal liver	uterus
E-GEOD-24207_47_3_13_mod.txt	ArrayExpress	E-GEOD-24207	1.29343274207	Mus musculus	mRNA analysis in different mouse tissues	FactorValue..TISSUE.	bone marrow	ovary
E-GEOD-18064_37_1_2_mod.txt	ArrayExpress	E-GEOD-18064	-1.55726421442	Mus musculus	Comparison of MBT/Pas and BALB/cByJ MEFs response after infection with Rift Valley Fever virus	FactorValue..STRAIN.	BALB/cByJ	MBT/Pas
E-GEOD-14001_28_1_3_mod.txt	ArrayExpress	E-GEOD-14001	-1.52018291162	Homo sapiens	Transcription profiling by array of human high and low grade ovarian serous carcinomas	Factor.Value.disease.staging.		low grade
E-GEOD-24207_47_5_10_mod.txt	ArrayExpress	E-GEOD-24207	-3.69630097847	Mus musculus	mRNA analysis in different mouse tissues	FactorValue..TISSUE.	diaphragm	liver
GDS3113_tissue_7_23_mod.txt	GEO	GDS3113	1.21598717419	Homo sapiens	Various normal tissues	tissue	fetal liver	small intestine
GDS1962_disease.state_1_3_mod.txt	GEO	GDS1962	-1.20299410285	Homo sapiens	Glioma-derived stem cell factor effect on angiogenesis in the brain	disease.state	astrocytomas	non-tumor
E-TABM-672_24_1_5_mod.txt	ArrayExpress	E-TABM-672	4.48291706961	Mus musculus	Transcription profiling of mouse embyronic stem cell line CGR8 during the first 10 days of differentiation into embryoid bodies	Factor.Value..Age.	0	4
GDS2666_time_3_6_mod.txt	GEO	GDS2666	-1.92046005305	Mus musculus	Embryonic R1 stem cell differentiation in vitro (MG-430A)	time	14 d	36 h
GDS2819_individual_2_3_mod.txt	GEO	GDS2819	-4.1335980399	Homo sapiens	Leukemic white blood cells and various RNA preparation protocols	individual	patient 10	patient 11
GDS1490_tissue_13_26_mod.txt	GEO	GDS1490	1.1193947188	Mus musculus	Neural tissue profiling	tissue	hippocampus CA3	retina
E-GEOD-24207_47_13_19_mod.txt	ArrayExpress	E-GEOD-24207	-2.48078253019	Mus musculus	mRNA analysis in different mouse tissues	FactorValue..TISSUE.	ovary	seminal vesicle
E-GEOD-25488_40_4_8_mod.txt	ArrayExpress	E-GEOD-25488	-1.64782878072	Mus musculus	Expression data from C3(1)Tag mammary tumors	FactorValue..GENOTYPE.	not specified	ras
E-MEXP-3020_33_1_4_mod.txt	ArrayExpress	E-MEXP-3020	1.59037494684	Homo sapiens	Low Dose PDT - Human Cells	Factor.Value..CELL_LINE.	DU145	U87
GDS1490_tissue_26_31_mod.txt	GEO	GDS1490	-1.33575578934	Mus musculus	Neural tissue profiling	tissue	retina	superior colliculus
E-GEOD-24628_23_1_2_mod.txt	ArrayExpress	E-GEOD-24628	-1.51211232309	Mus musculus	Subtypes of medulloblastoma have distinct developmental origins	Factor.Value..GENOTYPE.VARIATION.	BlbpCre; Ctnnb1(FlxEx3/+); Tp53 (Flx/Flx)	Ptch1(+/-)
GDS3113_tissue_1_12_mod.txt	GEO	GDS3113	1.96276657558	Homo sapiens	Various normal tissues	tissue	adrenal gland	lung
E-GEOD-20505_23_1_4_mod.txt	ArrayExpress	E-GEOD-20505	-3.53982462018	Homo sapiens	Transcription profilin by array of human CD34+ hematopoietic progenitor cells grown under different conditions	Factor.Value..TREATMENT.TIME.	0	96
E-GEOD-20124_28_2_4_mod.txt	ArrayExpress	E-GEOD-20124	2.45527846863	Homo sapiens	Transcriptome analysis of human Whartons jelly stem cells: in-house analysis	FactorValue..CELL.TYPE.	embryonic stem cell line	Wharton's jelly stem cell line
GDS3113_tissue_19_23_mod.txt	GEO	GDS3113	-2.27062195952	Homo sapiens	Various normal tissues	tissue	retina	small intestine
E-GEOD-18680_37_3_4_mod.txt	ArrayExpress	E-GEOD-18680	-1.96793479381	Homo sapiens	Gene expression profile of human ovarian cancer cell lines in vitro	FactorValue..CELL.LINE.	parental T112D	parental TOV21G
GDS3113_tissue_6_19_mod.txt	GEO	GDS3113	1.55904772995	Homo sapiens	Various normal tissues	tissue	fetal kidney	retina
E-GEOD-21278_33_4_9_mod.txt	ArrayExpress	E-GEOD-21278	-1.62389387938	Mus musculus	A genomic atlas of mouse hypothalamic development	Factor.Value..AGE.	embryonic day 13	embryonic day 18
GDS3113_tissue_7_19_mod.txt	GEO	GDS3113	3.48660913372	Homo sapiens	Various normal tissues	tissue	fetal liver	retina
E-GEOD-24207_47_14_15_mod.txt	ArrayExpress	E-GEOD-24207	1.22785887193	Mus musculus	mRNA analysis in different mouse tissues	FactorValue..TISSUE.	pancreatic acini	pancreatic islets
E-GEOD-20667_35_3_4_mod.txt	ArrayExpress	E-GEOD-20667	-3.60997195307	Homo sapiens	The Notch/Hes1 pathway sustains NF-B activation through CYLD repression in T cell leukemia	FactorValue..CELL.LINE.	JCRB0033 [CEM]	JCRB0086 [TALL-1]
GDS3142_tissue_15_19_mod.txt	GEO	GDS3142	1.60305521013	Mus musculus	Various tissues	tissue	pituitary gland	small intestine
E-GEOD-15904_24_4_5_mod.txt	ArrayExpress	E-GEOD-15904	-1.02537690723	Mus musculus	Transcription profiling by array of mouse mammary tumors	Factor.Value..HISTOLOGICAL.SUBTYPE.	Mix	not specified
GDS1490_tissue_23_34_mod.txt	GEO	GDS1490	-1.38574695284	Mus musculus	Neural tissue profiling	tissue	perirhinal cortex	white adipose tissue
E-GEOD-29450_33_1_2_mod.txt	ArrayExpress	E-GEOD-29450	-1.61877245482	Homo sapiens	Identification of Novel Therapeutic Targets in Microdissected Clear Cell Ovarian Cancers	FactorValue..CELL.TYPE.	Normal ovarian surface epithelium	Primary tumors from clear cell ovarian cancer
E-GEOD-13093_28_2_7_mod.txt	ArrayExpress	E-GEOD-13093	-1.24469247896	Mus musculus	Feeding schedule and the circadian clock shape rhythms in hepatic gene expression	FactorValue..STRAIN.OR.LINE.	C57/B6, Gender: male, Age: 8-12 weeks, Condition: Fasted	Cry1,Cry2 double KO, Gender: female, Age: 8-16 weeks, Condition: temporally restricted food availability CT1(25)-CT9(33)
E-GEOD-27473_35_1_2_mod.txt	ArrayExpress	E-GEOD-27473	6.58864622756	Homo sapiens	Expression data from MCF7 cell line after silencing of Estrogen receptor	FactorValue..KNOCKDOWN.	control	estrogen receptor alpha KD
GDS3142_tissue_4_9_mod.txt	GEO	GDS3142	2.57881075893	Mus musculus	Various tissues	tissue	brain	heart
GDS2671_time_3_7_mod.txt	GEO	GDS2671	-4.65055242613	Mus musculus	Embryonic V6.5 stem cell differentiation in vitro (MG-430A)	time	14 d	48 h
E-GEOD-32670_60_2_3_mod.txt	ArrayExpress	E-GEOD-32670	-8.85889853606	Homo sapiens	Time-course effect of estradiol and estradiol-BSA on early gene expression	FactorValue..CELL.LINE.	MDA-MB-231	SKBR3
GDS2615_time_1_2_mod.txt	GEO	GDS2615	-2.00802260161	Homo sapiens	Mucociliary differentiation of airway epithelial cells	time	0 d	10 d
E-GEOD-24207_47_2_16_mod.txt	ArrayExpress	E-GEOD-24207	-1.44853419874	Mus musculus	mRNA analysis in different mouse tissues	FactorValue..TISSUE.	adrenal gland	pituitary gland
GDS3113_tissue_14_25_mod.txt	GEO	GDS3113	-1.17676830464	Homo sapiens	Various normal tissues	tissue	ovary	spleen
GDS1490_tissue_14_26_mod.txt	GEO	GDS1490	1.13388056108	Mus musculus	Neural tissue profiling	tissue	hypothalamus	retina
E-GEOD-18907_36_1_2_mod.txt	ArrayExpress	E-GEOD-18907	4.51309202489	Mus musculus	Gene expression profiling of pregnant and virgin mouse lung and liver	FactorValue..TISSUE.	liver	lung
E-GEOD-30747_50_3_4_mod.txt	ArrayExpress	E-GEOD-30747	-1.76382277227	Mus musculus	AML mouse models	FactorValue..TRANSGENE.	inducible MLL-AF9;NrasG12D	not specified
GDS3142_tissue_13_14_mod.txt	GEO	GDS3142	1.81674124842	Mus musculus	Various tissues	tissue	muscle	ovary
E-GEOD-30885_44_1_2_mod.txt	ArrayExpress	E-GEOD-30885	4.26473765037	Mus musculus	Pre-metastatic expression array day 7	FactorValue..TISSUE.	liver	lung
E-GEOD-26408_33_2_3_mod.txt	ArrayExpress	E-GEOD-26408	-1.16197138677	Mus musculus	Signatures of murine B-cell development implicate Yy1 as a regulator of the germinal center-specific program	FactorValue..CELL.TYPE.	Purified Follicular (Cd19-positive/Cd21-intermediate/Cd23-high) B-cells	Purified Germinal Centre (B220-positive/PNA-high) B-cells
GDS3142_tissue_12_21_mod.txt	GEO	GDS3142	-2.19251163228	Mus musculus	Various tissues	tissue	lung	testis
E-GEOD-21774_23_1_2_mod.txt	ArrayExpress	E-GEOD-21774	-1.76696075635	Homo sapiens	CD62L expression identifies a unique subset of polyfunctional CD56dim NK cells: Groups 1-3	Factor.Value..CELL.TYPE.	CD3- CD56bright CD62L+ NK cells	CD3- CD56dim CD62L- NK cells
GDS2819_individual_18_25_mod.txt	GEO	GDS2819	2.03748983223	Homo sapiens	Leukemic white blood cells and various RNA preparation protocols	individual	patient 25	patient 7
E-GEOD-13987_34_1_3_mod.txt	ArrayExpress	E-GEOD-13987	-3.89819637153	Homo sapiens	Transcription profiling of human B lineage chronic lymphocytic leukemia, normal B, and normal T cells treated with rolipram, a PDE4 inhibitor	Factor.Value.cell.type.	B cell	T cell
E-GEOD-33892_51_3_4_mod.txt	ArrayExpress	E-GEOD-33892	-2.4224810299	Homo sapiens	Comparison of TEX and M9-ENL1 cell lines to HL60 and THP1 cell lines	FactorValue..LEUKEMIA.TYPE.	pre B-ALL	promyelocytic AML
E-GEOD-16874_32_1_2_mod.txt	ArrayExpress	E-GEOD-16874	-1.05708431766	Mus musculus	Expression in wild type and TgDREAM mouse B cells unstimulated or 2 days after LPS+IL4 stimulation	FactorValue..STIMULATION.	non stimulated	stimulated with LPS and mouse recombinant IL-4 (day 2)
E-GEOD-24207_47_1_22_mod.txt	ArrayExpress	E-GEOD-24207	-3.25863941119	Mus musculus	mRNA analysis in different mouse tissues	FactorValue..TISSUE.	adipose tissue	testis
GDS2554_disease.state_1_4_mod.txt	GEO	GDS2554	-1.9041525942	Mus musculus	Diffuse large B cell lymphoma model	disease.state	aggressive lymphoma	normal resting B Cell
E-GEOD-24207_47_8_23_mod.txt	ArrayExpress	E-GEOD-24207	7.49031274187	Mus musculus	mRNA analysis in different mouse tissues	FactorValue..TISSUE.	insulinoma	thymus
E-GEOD-32095_32_1_2_mod.txt	ArrayExpress	E-GEOD-32095	-4.78878585735	Mus musculus	GPR120 mediates high-fat diet induced obesity	FactorValue..ORGANISM.PART.	Epididymal adipose	liver
GDS3113_tissue_20_28_mod.txt	GEO	GDS3113	2.45673165459	Homo sapiens	Various normal tissues	tissue	salivary gland	thyroid
GDS3113_tissue_8_13_mod.txt	GEO	GDS3113	1.06399821822	Homo sapiens	Various normal tissues	tissue	fetal thymus	mammary gland
E-MEXP-3444_36_1_4_mod.txt	ArrayExpress	E-MEXP-3444	-1.00926308513	Mus musculus	Transcriptional profiling by array of mouse cerebellar cortex during postnatal development	Factor.Value.AGE.	0	7
E-GEOD-20547_29_1_2_mod.txt	ArrayExpress	E-GEOD-20547	1.4537458295	Mus musculus	A53T-??-synuclein overexpression mouse model signaling and striatal synaptic plasticity	Factor.Value..TISSUE.	brainstem	cerebellum
E-GEOD-30138_43_1_4_mod.txt	ArrayExpress	E-GEOD-30138	1.62153358139	Mus musculus	Global Gene Expression Analysis of Murine Limb Development	FactorValue..DEVELOPMENTAL.STAGE.	E10.5	E13.5
E-GEOD-33425_31_2_3_mod.txt	ArrayExpress	E-GEOD-33425	1.42548827587	Homo sapiens	Human MAIT and CD8++ cell development	FactorValue..CELL.TYPE.	CD161++CD8ab T cells	not specified
E-GEOD-11045_24_1_2_mod.txt	ArrayExpress	E-GEOD-11045	-1.72990986262	Homo sapiens	Transcription profiling of human kidney and liver	Factor.Value..ORGANISMPART.	kidney	liver
GDS3113_tissue_16_32_mod.txt	GEO	GDS3113	1.30546747671	Homo sapiens	Various normal tissues	tissue	peripheral blood lymphocyte	uterus
E-MEXP-2539_26_1_3_mod.txt	ArrayExpress	E-MEXP-2539	-1.50101007587	Mus musculus	Transcription profiling in primary mouse hepatocytes discriminates between true and false genotoxic compounds	Factor.Value.COMPOUND.	2-AAF	4-NP
E-GEOD-7869_29_2_4_mod.txt	ArrayExpress	E-GEOD-7869	-2.72958331713	Homo sapiens	Transcription profiling by array of human renal cysts from patients with autosomal dominant polycystic kidney disease	Factor.Value.histology.	medium cyst	normal
E-GEOD-27628_35_1_4_mod.txt	ArrayExpress	E-GEOD-27628	1.48300384285	Mus musculus	Expression data from affected skin from psoriasis mouse models and normal skin from control mice	FactorValue..STRAIN.	C57BL/6	FVB/NHsd
E-GEOD-17476_38_1_2_mod.txt	ArrayExpress	E-GEOD-17476	-2.01268117608	Homo sapiens	Expression data from E161K LMNA mutant heart and control	FactorValue..GENOTYPE.	LMNA E161K	LMNA wt
E-GEOD-24207_47_3_12_mod.txt	ArrayExpress	E-GEOD-24207	-1.36483843841	Mus musculus	mRNA analysis in different mouse tissues	FactorValue..TISSUE.	bone marrow	muscle
E-GEOD-24207_47_17_19_mod.txt	ArrayExpress	E-GEOD-24207	-1.41304323498	Mus musculus	mRNA analysis in different mouse tissues	FactorValue..TISSUE.	placenta	seminal vesicle
E-MEXP-2320_39_1_3_mod.txt	ArrayExpress	E-MEXP-2320	-1.94571418227	Mus musculus	Transcription profiling of mouse long-lived S6K1 -/- strain females compared to wild types	Factor.Value.OrganismPart.	fat	muscle
GDS3142_tissue_4_20_mod.txt	GEO	GDS3142	2.75579092074	Mus musculus	Various tissues	tissue	brain	spleen
GDS1054_age_1_5_mod.txt	GEO	GDS1054	2.57888871214	Rattus norvegicus	Iron deficiency effect on duodenum: time course (RAE230A)	age	12 wk	8 d
E-TABM-1125_27_2_3_mod.txt	ArrayExpress	E-TABM-1125	-2.49277988823	Mus musculus	Transcription profiling of mouse CD31(+) cells isolated from embryonic stem cells	Factor.Value..CELLTYPE.	CD31 positive endothelial cells	embryonic stem cell
GDS968_individual_40_56_mod.txt	GEO	GDS968	2.58718259606	Homo sapiens	Radiation therapy toxicity association with abnormal transcriptional response to DNA damage	individual	RadS7	SkCa8
E-GEOD-15151_29_1_2_mod.txt	ArrayExpress	E-GEOD-15151	-1.82072836334	Homo sapiens	Synthetic Lethal Interaction Between Oncogenic KRAS Dependency and Suppression of STK33 in Human Cancer Cells	Factor.Value.cell.line.	NOMO-1	SKM-1
GDS3516_disease.state_5_10_mod.txt	GEO	GDS3516	-1.72567070703	Homo sapiens	Nodular lymphocyte-predominant Hodgkin lymphoma: lymphocytic and histiocytic cells	disease.state	nodular lymphocyte-predominant Hodgkin lymphoma	normal plasma cells
GDS2671_time_1_3_mod.txt	GEO	GDS2671	2.48317659696	Mus musculus	Embryonic V6.5 stem cell differentiation in vitro (MG-430A)	time	0 h	14 d
GDS2819_disease.state_3_4_mod.txt	GEO	GDS2819	1.31291949487	Homo sapiens	Leukemic white blood cells and various RNA preparation protocols	disease.state	ALL with t 12, 21	AML with normal karyotype and other abnormalities
E-GEOD-30516_31_1_3_mod.txt	ArrayExpress	E-GEOD-30516	-4.20309510847	Homo sapiens	Dynamic re-wiring of apoptotic signaling networks enhances tumor cell killing by DNA damage	FactorValue..CELL.LINE.	BT20	MDA-MB-453
GDS3142_tissue_4_14_mod.txt	GEO	GDS3142	3.80206782077	Mus musculus	Various tissues	tissue	brain	ovary
E-GEOD-14897_25_1_5_mod.txt	ArrayExpress	E-GEOD-14897	-2.41959901994	Homo sapiens	Transcription profiling by array of human hepatic cells derived from foreskin fibroblast cells or embryonic stem cells	FactorValue.cell.type.	fibroblast	stem cell post hepatic differentiation
E-GEOD-24207_47_5_9_mod.txt	ArrayExpress	E-GEOD-24207	-2.68815615245	Mus musculus	mRNA analysis in different mouse tissues	FactorValue..TISSUE.	diaphragm	kidney
GDS2213_agent_1_4_mod.txt	GEO	GDS2213	-3.23917541503	Homo sapiens	Hepatoma cell response to inhibition of DNA methylation and histone deacetylation	agent	5-aza-dC	untreated
E-GEOD-17794_34_2_3_mod.txt	ArrayExpress	E-GEOD-17794	3.45069847936	Mus musculus	Expression data from B6C3F1 mice treated with 2-butoxyethanol	FactorValue..TISSUE.	Liver	Spleen
GDS3142_tissue_10_14_mod.txt	GEO	GDS3142	3.90736499578	Mus musculus	Various tissues	tissue	kidney	ovary
GDS3142_tissue_1_5_mod.txt	GEO	GDS3142	-2.57083590937	Mus musculus	Various tissues	tissue	adipose tissue	diaphragm
GDS3113_tissue_14_23_mod.txt	GEO	GDS3113	-2.05389821831	Homo sapiens	Various normal tissues	tissue	ovary	small intestine
GDS3142_tissue_4_21_mod.txt	GEO	GDS3142	1.53194913854	Mus musculus	Various tissues	tissue	brain	testis
E-GEOD-18597_35_1_2_mod.txt	ArrayExpress	E-GEOD-18597	-1.26698921951	Mus musculus	Expression data from mutant SOD1(G93A) transgenic mice	FactorValue..GENOTYPE.	SOD1G93A	wild-type
GDS3113_tissue_3_11_mod.txt	GEO	GDS3113	-1.9712010581	Homo sapiens	Various normal tissues	tissue	brain	liver
GDS3113_tissue_14_29_mod.txt	GEO	GDS3113	-1.73662065729	Homo sapiens	Various normal tissues	tissue	ovary	tonsil
GDS1282_disease.state_1_3_mod.txt	GEO	GDS1282	-2.23228478348	Homo sapiens	Clear cell sarcoma of the kidney	disease.state	clear cell sarcoma of the kidney	Wilms' tumor
GDS3113_tissue_10_15_mod.txt	GEO	GDS3113	-1.22436157723	Homo sapiens	Various normal tissues	tissue	kidney	pancreas
GDS2699_tissue_1_2_mod.txt	GEO	GDS2699	1.30460333652	Mus musculus	Mesenchymal and epithelial compartments of the developing intestine	tissue	epithelium	mesenchyme
GDS3142_tissue_3_13_mod.txt	GEO	GDS3142	-1.08920238662	Mus musculus	Various tissues	tissue	bone marrow	muscle
GDS3113_tissue_9_20_mod.txt	GEO	GDS3113	-1.43986706063	Homo sapiens	Various normal tissues	tissue	heart	salivary gland
E-MEXP-1649_37_5_6_mod.txt	ArrayExpress	E-MEXP-1649	2.64984394142	Mus musculus	Transcription profiling of mouse liver cells with liver specific deletion of Irs1 and/or Irs2 and Foxo1during fasting and feeding	Factor.Value..GENOTYPE.	Liver Specific Irs1 -/-	Liver Specific Irs1 -/-::Irs2 -/-
E-MEXP-1504_36_2_4_mod.txt	ArrayExpress	E-MEXP-1504	2.66649606215	Mus musculus	Transcription profiling of liver	Factor.Value..organism.part.	liver	spleen
GDS3113_tissue_3_7_mod.txt	GEO	GDS3113	-1.47865129711	Homo sapiens	Various normal tissues	tissue	brain	fetal liver
E-GEOD-14897_25_1_3_mod.txt	ArrayExpress	E-GEOD-14897	-1.95110968184	Homo sapiens	Transcription profiling by array of human hepatic cells derived from foreskin fibroblast cells or embryonic stem cells	FactorValue.cell.type.	fibroblast	induced pluripotent stem cell
GDS2736_disease.state_8_9_mod.txt	GEO	GDS2736	-1.09484364102	Homo sapiens	Malignant fibrous histiocytoma and various soft tissue sarcomas	disease.state	myxoid liposarcoma	synovial sarcoma
GDS2159_time_2_3_mod.txt	GEO	GDS2159	1.90978001645	Mus musculus	Spinal cord injury model: time course	time	0 h	24 h
GDS1490_tissue_11_29_mod.txt	GEO	GDS1490	-1.36858258474	Mus musculus	Neural tissue profiling	tissue	hippocampal formation	spleen
GDS3142_tissue_8_13_mod.txt	GEO	GDS3142	-2.04094360851	Mus musculus	Various tissues	tissue	fetus	muscle
E-GEOD-24207_47_8_17_mod.txt	ArrayExpress	E-GEOD-24207	7.67412603324	Mus musculus	mRNA analysis in different mouse tissues	FactorValue..TISSUE.	insulinoma	placenta
E-GEOD-13093_28_1_5_mod.txt	ArrayExpress	E-GEOD-13093	-1.93298772712	Mus musculus	Feeding schedule and the circadian clock shape rhythms in hepatic gene expression	FactorValue..STRAIN.OR.LINE.	C57/B6, Gender: male, Age: 8-12 weeks	Cry1,Cry2 double KO mice, Gender: male, Age: 8-16 weeks, Condition: ad libitum food availability
E-GEOD-24207_47_11_23_mod.txt	ArrayExpress	E-GEOD-24207	-1.70248043878	Mus musculus	mRNA analysis in different mouse tissues	FactorValue..TISSUE.	lung	thymus
E-GEOD-37290_32_1_2_mod.txt	ArrayExpress	E-GEOD-37290	-3.76422807155	Homo sapiens	Expression Data from HNF1b-knockdown RMG2-ovarian cancer cells	FactorValue..TRANSFECTED.WITH.	HNF1b-targeting shRNA (clones V2LHS_196459)	HNF1b-targeting shRNA (clones V2LHS_204881)
GDS3113_tissue_5_17_mod.txt	GEO	GDS3113	1.84305069981	Homo sapiens	Various normal tissues	tissue	fetal brain	placenta
GDS1756_tissue_1_2_mod.txt	GEO	GDS1756	-2.41825111519	Mus musculus	CAG repeat knock-in model of spinocerebellar ataxia type 1 progression	tissue	cerebellum	forebrain
GDS3113_tissue_6_21_mod.txt	GEO	GDS3113	-1.8215283443	Homo sapiens	Various normal tissues	tissue	fetal kidney	skeletal muscle
E-MEXP-2700_27_2_3_mod.txt	ArrayExpress	E-MEXP-2700	-1.18198414708	Homo sapiens	Investigating gradients of gene expression involved in early human cortical development	Factor.Value.AGE.	9	10
E-GEOD-16238_35_1_2_mod.txt	ArrayExpress	E-GEOD-16238	1.52698491338	Homo sapiens	Genome-wide identification of binding sites of Evi1 in human myeloid cell lines	Factor.Value..DISEASE.	erythroleukemia (AML M6)	squamous cell carcinoma of the lung
E-GEOD-24207_47_7_20_mod.txt	ArrayExpress	E-GEOD-24207	-1.67899012417	Mus musculus	mRNA analysis in different mouse tissues	FactorValue..TISSUE.	heart	small intestine
E-GEOD-21716_41_4_5_mod.txt	ArrayExpress	E-GEOD-21716	3.17264159028	Mus musculus	Hepatic xenobiotic metabolizing enzyme gene expression through the life stages of the mouse	FactorValue..AGE.	6 month	GD19
E-GEOD-18811_24_3_5_mod.txt	ArrayExpress	E-GEOD-18811	4.04572828937	Homo sapiens	Transcriptome Analysis and Molecular Signature of Human Retinal Pigment Epithelium	Factor.Value..CELL.TYPE.	adult native RPE from 78 y.o. donor	fetal RPE
E-GEOD-21419_36_1_5_mod.txt	ArrayExpress	E-GEOD-21419	1.3083837897	Mus musculus	Laser Capture Microdissection of Hyperlipidemic Mouse Aorta Atherosclerosis	FactorValue..ORGANISM.PART.	adventitia of abdominal aorta	media of abdominal aorta
GDS1956_disease.state_2_4_mod.txt	GEO	GDS1956	1.38750451206	Homo sapiens	Various muscle diseases (HG-U133A)	disease.state	amyotophic lateral sclerosis	Calpain 3 mutation
GDS3113_tissue_7_13_mod.txt	GEO	GDS3113	2.1949141251	Homo sapiens	Various normal tissues	tissue	fetal liver	mammary gland
GDS2819_individual_17_20_mod.txt	GEO	GDS2819	1.6498256177	Homo sapiens	Leukemic white blood cells and various RNA preparation protocols	individual	patient 24	patient 27
E-GEOD-27973_41_2_3_mod.txt	ArrayExpress	E-GEOD-27973	2.44861513792	Homo sapiens	Human airway epithelial responses to rhinovirus infection and cigarette smoke extract alone and in combination	FactorValue..DONOR.	2	3
E-GEOD-34482_31_2_6_mod.txt	ArrayExpress	E-GEOD-34482	-1.47736012533	Homo sapiens	Expression data from transfection of SW1783 and U87 glioma cells with miR-376a* for 24 and 72 hours	FactorValue..TRANSFECTED.	control miRNA (72 h)	miR-376a*G (72 h)
E-MEXP-3020_26_1_2_mod.txt	ArrayExpress	E-MEXP-3020	-1.33830011031	Homo sapiens	Low Dose PDT - Human Cells	Factor.Value..CELL_TYPE.	glioblastoma	prostate carcinoma
GDS3113_tissue_16_28_mod.txt	GEO	GDS3113	1.18788480034	Homo sapiens	Various normal tissues	tissue	peripheral blood lymphocyte	thyroid
GDS1265_age_1_4_mod.txt	GEO	GDS1265	5.43938610069	Mus musculus	Oocyte development (MOE430A)	age	12 d	2 d
GDS3113_tissue_11_22_mod.txt	GEO	GDS3113	3.3886189039	Homo sapiens	Various normal tissues	tissue	liver	skin
GDS3113_tissue_21_29_mod.txt	GEO	GDS3113	1.42723167576	Homo sapiens	Various normal tissues	tissue	skeletal muscle	tonsil
GDS3113_tissue_5_24_mod.txt	GEO	GDS3113	1.62377347461	Homo sapiens	Various normal tissues	tissue	fetal brain	spinal cord
E-GEOD-18281_36_3_6_mod.txt	ArrayExpress	E-GEOD-18281	4.4521613531	Mus musculus	Spatial mapping of thymic stromal microenvironments reveals unique features influencing T lymphoid differentiation	FactorValue..TISSUE.	Peri-medullary cortex	Whole medulla
E-GEOD-23938_38_4_8_mod.txt	ArrayExpress	E-GEOD-23938	1.8658754559	Mus musculus	Comprehensive genomic profiling identified miRNA signatures associated with mammary tumor differentiation and development	FactorValue..GENETICALLY.ENGINEERED.MOUSE.MODEL.	MMTV-H2N	not specified
GDS2956_tissue_1_2_mod.txt	GEO	GDS2956	3.19825783124	Rattus norvegicus	Roux-en-Y gastric bypass model	tissue	hypothalamus	subcutaneous abdominal fat
GDS2819_individual_7_19_mod.txt	GEO	GDS2819	2.40811089706	Homo sapiens	Leukemic white blood cells and various RNA preparation protocols	individual	patient 15	patient 26
GDS2819_individual_3_24_mod.txt	GEO	GDS2819	3.11922105489	Homo sapiens	Leukemic white blood cells and various RNA preparation protocols	individual	patient 11	patient 6
GDS3142_tissue_1_13_mod.txt	GEO	GDS3142	-2.43642255551	Mus musculus	Various tissues	tissue	adipose tissue	muscle
E-GEOD-21278_33_5_11_mod.txt	ArrayExpress	E-GEOD-21278	-3.07782946891	Mus musculus	A genomic atlas of mouse hypothalamic development	Factor.Value..AGE.	embryonic day 14	postnatal day 21
E-GEOD-21515_27_1_6_mod.txt	ArrayExpress	E-GEOD-21515	-1.25949779123	Mus musculus	Expression data from mouse ES and iPS cells	Factor.Value..CELL.LINE.	ESC2	R1
E-GEOD-22381_38_1_3_mod.txt	ArrayExpress	E-GEOD-22381	-3.21050984795	Mus musculus	Identification of downstream transcriptional targets of Dlx5 during early mouse inner ear (otocyst/otic vesicle) development	FactorValue..AGE.	4 days post-differentiation in-vitro	E10.5
GDS2255_cell.type_1_2_mod.txt	GEO	GDS2255	1.14586949215	Homo sapiens	Transmigrated neutrophils in the alveolar space of endotoxin-exposed lung	cell.type	alveolar space	circulating
E-TABM-672_24_3_5_mod.txt	ArrayExpress	E-TABM-672	3.71207371709	Mus musculus	Transcription profiling of mouse embyronic stem cell line CGR8 during the first 10 days of differentiation into embryoid bodies	Factor.Value..Age.	2	4
E-GEOD-33549_39_2_16_mod.txt	ArrayExpress	E-GEOD-33549	1.2472527553	Mus musculus	Expression data from mouse T-cell lymphomas	FactorValue..GENOTYPE.VARIATION.	Cdkn2a knock out- Retroviral insertional mutagenesis	TLX1 transgenic and RUNX heterozygous crossed
GDS3113_tissue_6_12_mod.txt	GEO	GDS3113	1.06072898973	Homo sapiens	Various normal tissues	tissue	fetal kidney	lung
E-GEOD-15129_29_3_4_mod.txt	ArrayExpress	E-GEOD-15129	-1.21604968464	Mus musculus	Coenzyme Q10-dependent gene expression in SAMP1 mice tissues	Factor.Value..TISSUE.	kidney	liver
E-GEOD-21515_27_3_4_mod.txt	ArrayExpress	E-GEOD-21515	-1.593698714	Mus musculus	Expression data from mouse ES and iPS cells	Factor.Value..CELL.LINE.	IP14D-101	IP20D-3
GDS638_age_3_5_mod.txt	GEO	GDS638	1.30667404914	Mus musculus	Dystrophin-deficient mdx diaphram muscle development time course	age	23 day	56 day
GDS2819_individual_15_20_mod.txt	GEO	GDS2819	1.6279385075	Homo sapiens	Leukemic white blood cells and various RNA preparation protocols	individual	patient 22	patient 27
E-GEOD-35961_34_2_3_mod.txt	ArrayExpress	E-GEOD-35961	-2.99800406	Mus musculus	Expression data from mouse liver treated with metformin	FactorValue..DIET.	methionine- and choline-deficient diet+ high fat diet (NASH)	normal chow (normal)
E-TABM-1125_27_1_3_mod.txt	ArrayExpress	E-TABM-1125	-2.310456161	Mus musculus	Transcription profiling of mouse CD31(+) cells isolated from embryonic stem cells	Factor.Value..CELLTYPE.	CD31 negative endothelial cells	embryonic stem cell
E-GEOD-13306_34_2_4_mod.txt	ArrayExpress	E-GEOD-13306	-1.69987963441	Mus musculus	Retinoic Acid Enhances Foxp3 Induction Indirectly by Relieving Inhibition from CD4(+)CD44(hi) Cells.	FactorValue..CULTURE.	CD4+Foxp3- T cells were culture with Sp-DCs at a 10:1 ratio with anti-CD3 (1ug/ml) + TGFbeta (0.6ng/ml) + IL-2 (5ng/ml on D2 and D4) for 5 days	Congenically marked (CD45.1 or CD45.2) memory T cells were cultured with CD44negCD62LhiCD25-CD4+ (naive) T cells at a 2:1 ratio with anti-CD3/CD28 beads + IL-2 (20 U/ml) + TGFbeta (10 ng/ml) + Retinoic Acid (100nM) for 48hrs
E-GEOD-37775_28_1_2_mod.txt	ArrayExpress	E-GEOD-37775	2.66875047	Mus musculus	Genome-wide characterization of menin-dependent H3K4me3 reveals a specific role for menin in the regulation of genes implicated in MEN1-like tumors (mRNA)	FactorValue..CELL.TYPE.	ES cell	ES cells were differentiated into pancreatic islet-like endocrine cells (PILECs)
GDS1376_cell.type_1_2_mod.txt	GEO	GDS1376	3.77764164808	Homo sapiens	Essential thrombocythemia	cell.type	platelet	white blood cell
GDS3142_tissue_2_5_mod.txt	GEO	GDS3142	1.46888439105	Mus musculus	Various tissues	tissue	adrenal gland	diaphragm
E-GEOD-35416_38_1_5_mod.txt	ArrayExpress	E-GEOD-35416	1.11045606888	Mus musculus	Transcriptional profiling of mouse inner cell mass of the blastocyst	FactorValue..SOURCE.AGE.	8-week	E3.5
E-GEOD-24547_44_2_3_mod.txt	ArrayExpress	E-GEOD-24547	1.20908778471	Homo sapiens	Transcriptional pathway signatures for the Aurora inhibitor Danusertib	FactorValue..CELL.LINE.	COLO205	HCT-116
E-GEOD-24207_47_19_20_mod.txt	ArrayExpress	E-GEOD-24207	-1.32556419113	Mus musculus	mRNA analysis in different mouse tissues	FactorValue..TISSUE.	seminal vesicle	small intestine
E-GEOD-21716_41_5_7_mod.txt	ArrayExpress	E-GEOD-21716	-3.16916800853	Mus musculus	Hepatic xenobiotic metabolizing enzyme gene expression through the life stages of the mouse	FactorValue..AGE.	GD19	PD67
E-GEOD-21515_27_2_5_mod.txt	ArrayExpress	E-GEOD-21515	-1.62136952602	Mus musculus	Expression data from mouse ES and iPS cells	Factor.Value..CELL.LINE.	IP14D-1	IP36D-3
E-GEOD-19338_24_1_2_mod.txt	ArrayExpress	E-GEOD-19338	-1.47507372465	Mus musculus	Expression profiles of villus and crypt layers of large intestine from C57Bl/6	Factor.Value..LAYER.OF.EPITHELIUM.	F1 (villus)	F10 (crypt)
E-TABM-669_25_2_4_mod.txt	ArrayExpress	E-TABM-669	-3.41047574152	Mus musculus	Transcription profiling of mouse embryonic stem cell line Sox1Tv2 during neuronal differentiation	Factor.Value..Age.d..	E14+10 days	E14+3 days
E-GEOD-27686_35_1_3_mod.txt	ArrayExpress	E-GEOD-27686	1.27575548664	Mus musculus	Accumulating mitochondrial DNA mutations drive premature hematopoietic aging phenotypes molecularly distinct from physiologic stem cell aging	FactorValue..AGE.	24 months	8-12 weeks
E-MEXP-2539_26_3_10_mod.txt	ArrayExpress	E-MEXP-2539	1.45617227175	Mus musculus	Transcription profiling in primary mouse hepatocytes discriminates between true and false genotoxic compounds	Factor.Value.COMPOUND.	4-NP	MitC
E-GEOD-16728_33_1_2_mod.txt	ArrayExpress	E-GEOD-16728	1.36489990973	Homo sapiens	Transcription profiling of whole blood from sickle-cell disease patients using globin mRNA reduction	Factor.Value.Sample.Preparation.	Globin-depleted RNA	RNA extracted from PBMC
E-GEOD-23371_33_1_2_mod.txt	ArrayExpress	E-GEOD-23371	1.33934730927	Homo sapiens	Transcriptomes of monocyte-derives DCs stimulated with various compounds	FactorValue..STIMULUS.	IL10/dexamethasone 24 hr	IL10/dexamethasone 24 hr, then LPS 6hr
GDS3142_tissue_4_16_mod.txt	GEO	GDS3142	2.67064283209	Mus musculus	Various tissues	tissue	brain	placenta
GDS1608_tissue_4_5_mod.txt	GEO	GDS1608	2.02261256805	Rattus norvegicus	Cocaine addiction effect on reward-related brain regions	tissue	nucleus accumbens	septum
GDS1962_tissue_1_3_mod.txt	GEO	GDS1962	1.28769358355	Homo sapiens	Glioma-derived stem cell factor effect on angiogenesis in the brain	tissue	not applicable	tumor grade III
E-GEOD-24207_47_11_18_mod.txt	ArrayExpress	E-GEOD-24207	-3.02735048394	Mus musculus	mRNA analysis in different mouse tissues	FactorValue..TISSUE.	lung	salivary gland
E-GEOD-24207_47_6_14_mod.txt	ArrayExpress	E-GEOD-24207	-5.60169034931	Mus musculus	mRNA analysis in different mouse tissues	FactorValue..TISSUE.	eye	pancreatic acini
GDS3142_tissue_10_16_mod.txt	GEO	GDS3142	2.77594000711	Mus musculus	Various tissues	tissue	kidney	placenta
GDS2671_time_3_4_mod.txt	GEO	GDS2671	-4.25188733021	Mus musculus	Embryonic V6.5 stem cell differentiation in vitro (MG-430A)	time	14 d	18 h
GDS3142_tissue_3_6_mod.txt	GEO	GDS3142	-1.19272227713	Mus musculus	Various tissues	tissue	bone marrow	embryonic stem cells
GDS3142_tissue_5_7_mod.txt	GEO	GDS3142	1.74645520989	Mus musculus	Various tissues	tissue	diaphragm	eye

## Sheet: Concordant
Gene symbol	Description	# of experiments with VIM	%concordant	Pearson Coef	Pearson p-val.
VIM	vimentin [Source:HGNC Symbol;Acc:12692]	1531
ANXA1	annexin A1 [Source:HGNC Symbol;Acc:533]	882	89.1156462585	0.695803749309	4.96180698934e-222
S100A6	S100 calcium binding protein A6 [Source:HGNC Symbol;Acc:10496]	793	88.1462799496	0.689089456542	4.27887594214e-216
ANXA2	annexin A2 [Source:HGNC Symbol;Acc:537]	767	90.482398957	0.676920019794	9.68313136669e-206
CAPG	capping protein (actin filament), gelsolin-like [Source:HGNC Symbol;Acc:1474]	691	88.2778581766	0.676733547811	1.38289275699e-205
LGALS1	lectin, galactoside-binding, soluble, 1 [Source:HGNC Symbol;Acc:6561]	888	91.1036036036	0.664689711961	7.94569553207e-196
SPARC	secreted protein, acidic, cysteine-rich (osteonectin) [Source:HGNC Symbol;Acc:11219]	850	88.8235294118	0.662955887821	1.85205350113e-194
S100A4	S100 calcium binding protein A4 [Source:HGNC Symbol;Acc:10494]	854	87.8220140515	0.65993068092	4.2843549729e-192
EMP3	epithelial membrane protein 3 [Source:HGNC Symbol;Acc:3335]	734	92.6430517711	0.653041355762	8.21406158927e-187
AXL	AXL receptor tyrosine kinase [Source:HGNC Symbol;Acc:905]	554	92.238267148	0.652140111803	3.93918218454e-186
SERPINH1	serpin peptidase inhibitor, clade H (heat shock protein 47), member 1, (collagen binding protein 1) [Source:HGNC Symbol;Acc:1546]	587	89.7785349233	0.634545931949	2.71996716502e-173
TIMP1	TIMP metallopeptidase inhibitor 1 [Source:HGNC Symbol;Acc:11820]	691	82.6338639653	0.630490677759	1.89030307789e-170
COL1A1	collagen, type I, alpha 1 [Source:HGNC Symbol;Acc:2197]	814	85.6265356265	0.628652280376	3.55634590701e-169
CNN2	calponin 2 [Source:HGNC Symbol;Acc:2156]	352	88.6363636364	0.627335784745	2.87345720984e-168
LGALS3	lectin, galactoside-binding, soluble, 3 [Source:HGNC Symbol;Acc:6563]	648	83.7962962963	0.625650808507	4.10607302886e-167
FSTL1	follistatin-like 1 [Source:HGNC Symbol;Acc:3972]	770	90.6493506494	0.625562495292	4.7181099005e-167
GPX8	glutathione peroxidase 8 (putative) [Source:HGNC Symbol;Acc:33100]	328	90.8536585366	0.618489375914	2.78088170078e-162
RBMS1	RNA binding motif, single stranded interacting protein 1 [Source:HGNC Symbol;Acc:9907]	601	88.0199667221	0.614753744968	8.21848063912e-160
COL5A2	collagen, type V, alpha 2 [Source:HGNC Symbol;Acc:2210]	661	86.8381240545	0.61034197015	6.16804631951e-157
NOTCH2	notch 2 [Source:HGNC Symbol;Acc:7882]	533	84.2401500938	0.603574666446	1.29871652007e-152
CMTM3	CKLF-like MARVEL transmembrane domain containing 3 [Source:HGNC Symbol;Acc:19174]	255	92.9411764706	0.591487828719	3.81993694001e-145
RHOJ	ras homolog family member J [Source:HGNC Symbol;Acc:688]	490	88.3673469388	0.591370858302	4.49564923652e-145
CAV1	caveolin 1, caveolae protein, 22kDa [Source:HGNC Symbol;Acc:1527]	800	86.0	0.591243645686	5.36648070419e-145
MDFIC	MyoD family inhibitor domain containing [Source:HGNC Symbol;Acc:28870]	565	83.0088495575	0.586934204191	2.06318179983e-142
COL4A2	collagen, type IV, alpha 2 [Source:HGNC Symbol;Acc:2203]	651	80.6451612903	0.584702817614	4.34255786861e-141
ANTXR1	anthrax toxin receptor 1 [Source:HGNC Symbol;Acc:21014]	624	89.9038461538	0.581514411987	3.24133946119e-139
COL1A2	collagen, type I, alpha 2 [Source:HGNC Symbol;Acc:2198]	849	87.5147232038	0.577417548246	7.71165610756e-137
LTBP1	latent transforming growth factor beta binding protein 1 [Source:HGNC Symbol;Acc:6714]	612	87.7450980392	0.577395572028	7.93970740319e-137
COL6A1	collagen, type VI, alpha 1 [Source:HGNC Symbol;Acc:2211]	679	83.2106038292	0.573075418459	2.34080453059e-134
WTIP	Wilms tumor 1 interacting protein [Source:HGNC Symbol;Acc:20964]	160	93.75	0.571049481005	3.27235644655e-133
EMP1	epithelial membrane protein 1 [Source:HGNC Symbol;Acc:3333]	853	79.9531066823	0.569093372423	4.10512521557e-132
PMP22	peripheral myelin protein 22 [Source:HGNC Symbol;Acc:9118]	740	85.2702702703	0.560237046146	3.12989178546e-127
PDLIM2	PDZ and LIM domain 2 (mystique) [Source:HGNC Symbol;Acc:13992]	515	81.1650485437	0.559414707496	8.73786809223e-127
TWIST1	twist homolog 1 (Drosophila) [Source:HGNC Symbol;Acc:12428]	384	93.2291666667	0.557762987426	6.81098256886e-126
MMP2	matrix metallopeptidase 2 (gelatinase A, 72kDa gelatinase, 72kDa type IV collagenase) [Source:HGNC Symbol;Acc:7166]	692	90.8959537572	0.557596607434	8.37075442777e-126
LOXL1	lysyl oxidase-like 1 [Source:HGNC Symbol;Acc:6665]	696	84.0517241379	0.557341532744	1.14805139039e-125
ANTXR2	anthrax toxin receptor 2 [Source:HGNC Symbol;Acc:21732]	564	80.6737588652	0.556989499	1.77465438062e-125
MSN	moesin [Source:HGNC Symbol;Acc:7373]	639	89.5148669797	0.554758449758	2.77098717969e-124
AKAP12	A kinase (PRKA) anchor protein 12 [Source:HGNC Symbol;Acc:370]	704	79.6875	0.551531519658	1.42228286767e-122
PCOLCE	procollagen C-endopeptidase enhancer [Source:HGNC Symbol;Acc:8738]	719	86.7872044506	0.551247168573	2.00818243947e-122
IFITM3	interferon induced transmembrane protein 3 [Source:HGNC Symbol;Acc:5414]	600	74.5	0.550380844142	5.73268151943e-122
CD44	CD44 molecule (Indian blood group) [Source:HGNC Symbol;Acc:1681]	884	81.221719457	0.546000757503	1.09968865723e-119
GPR124	G protein-coupled receptor 124 [Source:HGNC Symbol;Acc:17849]	403	91.0669975186	0.545651887836	1.66591013508e-119
TRIP6	thyroid hormone receptor interactor 6 [Source:HGNC Symbol;Acc:12311]	392	81.3775510204	0.542608565029	6.11238580756e-118
LHFP	lipoma HMGIC fusion partner [Source:HGNC Symbol;Acc:6586]	615	79.837398374	0.542551509218	6.53716921305e-118
CTGF	connective tissue growth factor [Source:HGNC Symbol;Acc:2500]	697	79.6269727403	0.540071472609	1.19756409724e-116
LOX	lysyl oxidase [Source:HGNC Symbol;Acc:6664]	741	88.6639676113	0.539843167895	1.5632511226e-116
IGFBP6	insulin-like growth factor binding protein 6 [Source:HGNC Symbol;Acc:5475]	619	84.0064620355	0.539817810267	1.61019064415e-116
FZD2	frizzled family receptor 2 [Source:HGNC Symbol;Acc:4040]	475	87.7894736842	0.539817614459	1.61055851865e-116
PLEKHO1	pleckstrin homology domain containing, family O member 1 [Source:HGNC Symbol;Acc:24310]	290	90.0	0.538954007693	4.40459515307e-116
DSE	dermatan sulfate epimerase [Source:HGNC Symbol;Acc:21144]	325	87.6923076923	0.538171971241	1.09262638344e-115
TIMP2	TIMP metallopeptidase inhibitor 2 [Source:HGNC Symbol;Acc:11821]	795	84.7798742138	0.532628105535	6.39738211787e-113
CDH11	cadherin 11, type 2, OB-cadherin (osteoblast) [Source:HGNC Symbol;Acc:1750]	691	85.8176555716	0.527049020024	3.46428155011e-110
PLA2G4A	phospholipase A2, group IVA (cytosolic, calcium-dependent) [Source:HGNC Symbol;Acc:9035]	489	83.2310838446	0.525015656831	3.33637981254e-109
FRMD6	FERM domain containing 6 [Source:HGNC Symbol;Acc:19839]	293	87.0307167235	0.524324897036	7.17659259276e-109
PLAUR	plasminogen activator, urokinase receptor [Source:HGNC Symbol;Acc:9053]	539	87.3840445269	0.523938559467	1.10059735963e-108
WWTR1	WW domain containing transcription regulator 1 [Source:HGNC Symbol;Acc:24042]	626	79.0734824281	0.521769555917	1.20174858565e-107
NID1	nidogen 1 [Source:HGNC Symbol;Acc:7821]	567	87.4779541446	0.519868332873	9.63072262877e-107
LRRK1	leucine-rich repeat kinase 1 [Source:HGNC Symbol;Acc:18608]	366	82.5136612022	0.515045902042	1.78110216323e-104
DDR2	discoidin domain receptor tyrosine kinase 2 [Source:HGNC Symbol;Acc:2731]	504	90.0793650794	0.514777188515	2.37652248247e-104
TPM2	tropomyosin 2 (beta) [Source:HGNC Symbol;Acc:12011]	715	76.9230769231	0.513796001414	6.7973946266e-104
BGN	biglycan [Source:HGNC Symbol;Acc:1044]	605	76.8595041322	0.513129045306	1.38588451667e-103
POSTN	periostin, osteoblast specific factor [Source:HGNC Symbol;Acc:16953]	689	84.0348330914	0.512514592864	2.66777092604e-103
TAGLN	transgelin [Source:HGNC Symbol;Acc:11553]	733	80.4911323329	0.511347761007	9.21846816441e-103
FXYD5	FXYD domain containing ion transport regulator 5 [Source:HGNC Symbol;Acc:4029]	528	83.9015151515	0.510941364718	1.41816181799e-102
WSB1	WD repeat and SOCS box containing 1 [Source:HGNC Symbol;Acc:19221]	460	86.3043478261	0.510739529672	1.75605374011e-102
EFEMP2	EGF containing fibulin-like extracellular matrix protein 2 [Source:HGNC Symbol;Acc:3219]	538	85.687732342	0.509676479938	5.39937403269e-102
PDPN	podoplanin [Source:HGNC Symbol;Acc:29602]	492	82.1138211382	0.508469433197	1.92369596521e-101
GNG11	guanine nucleotide binding protein (G protein), gamma 11 [Source:HGNC Symbol;Acc:4403]	628	89.3312101911	0.507259227654	6.84151692945e-101
LY6C2	LY6C2	134	76.8656716418	0.506517469191	1.48520224209e-100
GJA1	gap junction protein, alpha 1, 43kDa [Source:HGNC Symbol;Acc:4274]	766	75.5874673629	0.506251445241	1.96025841716e-100
CALHM2	calcium homeostasis modulator 2 [Source:HGNC Symbol;Acc:23493]	252	83.3333333333	0.50234161063	1.12589907869e-98
LPAR1	lysophosphatidic acid receptor 1 [Source:HGNC Symbol;Acc:3166]	506	76.8774703557	0.501888157674	1.79493817244e-98
VCAN	versican [Source:HGNC Symbol;Acc:2464]	565	84.2477876106	0.501631632769	2.33614525065e-98
THBS1	thrombospondin 1 [Source:HGNC Symbol;Acc:11785]	649	81.2018489985	0.500812852448	5.40943842692e-98
RCN1	reticulocalbin 1, EF-hand calcium binding domain [Source:HGNC Symbol;Acc:9934]	542	79.1512915129	0.500663292671	6.30453513418e-98
FBN1	fibrillin 1 [Source:HGNC Symbol;Acc:3603]	643	90.5132192846	0.499222525679	2.74531253502e-97
PRKCDBP	protein kinase C, delta binding protein [Source:HGNC Symbol;Acc:9400]	587	86.7120954003	0.497775520506	1.19460902955e-96
SLC25A24	solute carrier family 25 (mitochondrial carrier; phosphate carrier), member 24 [Source:HGNC Symbol;Acc:20662]	621	86.3123993559	0.497766701856	1.20533700247e-96
COL11A1	collagen, type XI, alpha 1 [Source:HGNC Symbol;Acc:2186]	426	77.2300469484	0.497459066716	1.64620400638e-96
CCDC80	coiled-coil domain containing 80 [Source:HGNC Symbol;Acc:30649]	405	88.6419753086	0.496916375723	2.85074506841e-96
ARHGDIB	Rho GDP dissociation inhibitor (GDI) beta [Source:HGNC Symbol;Acc:679]	590	79.6610169492	0.496470495022	4.47270575078e-96
LAMB2	laminin, beta 2 (laminin S) [Source:HGNC Symbol;Acc:6487]	557	84.0215439856	0.495424270419	1.28357993996e-95
RPL13	ribosomal protein L13 [Source:HGNC Symbol;Acc:10303]	343	85.7142857143	0.494276693997	4.06259389572e-95
ACTA2	actin, alpha 2, smooth muscle, aorta [Source:HGNC Symbol;Acc:130]	754	78.7798408488	0.493483967758	8.98143807057e-95
PDGFRB	platelet-derived growth factor receptor, beta polypeptide [Source:HGNC Symbol;Acc:8804]	586	82.4232081911	0.49325566801	1.12824567462e-94
BNC2	basonuclin 2 [Source:HGNC Symbol;Acc:30988]	523	83.3652007648	0.492379327086	2.70362131865e-94
KLHL5	kelch-like 5 (Drosophila) [Source:HGNC Symbol;Acc:6356]	338	71.3017751479	0.489945548463	3.02161464359e-93
MYADM	myeloid-associated differentiation marker [Source:HGNC Symbol;Acc:7544]	460	82.6086956522	0.489398929113	5.18227126345e-93
ADAMTS1	ADAM metallopeptidase with thrombospondin type 1 motif, 1 [Source:HGNC Symbol;Acc:217]	569	82.6010544815	0.48859123013	1.14794943221e-92
LRRC8C	leucine rich repeat containing 8 family, member C [Source:HGNC Symbol;Acc:25075]	300	82.6666666667	0.487491232986	3.37937426486e-92
TPM4	tropomyosin 4 [Source:HGNC Symbol;Acc:12013]	659	88.315629742	0.485546257815	2.258260821e-91
WIPF1	WAS/WASL interacting protein family, member 1 [Source:HGNC Symbol;Acc:12736]	420	84.2857142857	0.484646377508	5.4156348412e-91
ELK3	ELK3, ETS-domain protein (SRF accessory protein 2) [Source:HGNC Symbol;Acc:3325]	481	90.8523908524	0.483761602856	1.27656655238e-90
SCARA3	scavenger receptor class A, member 3 [Source:HGNC Symbol;Acc:19000]	466	83.9055793991	0.482605045047	3.90106077391e-90
TNC	tenascin C [Source:HGNC Symbol;Acc:5318]	679	78.4977908689	0.482502994575	4.30427795891e-90
ETS1	v-ets erythroblastosis virus E26 oncogene homolog 1 (avian) [Source:HGNC Symbol;Acc:3488]	542	75.2767527675	0.482155821338	6.01334666441e-90
SFXN3	sideroflexin 3 [Source:HGNC Symbol;Acc:16087]	553	79.3851717902	0.482137359618	6.12116014346e-90
GSN	gelsolin [Source:HGNC Symbol;Acc:4620]	723	81.8810511757	0.480082578037	4.393794887e-89
SGCE	sarcoglycan, epsilon [Source:HGNC Symbol;Acc:10808]	493	83.1643002028	0.478079695015	2.9622758367e-88
EHD4	EH-domain containing 4 [Source:HGNC Symbol;Acc:3245]	469	79.3176972281	0.477679337762	4.3314384013e-88
FKBP7	FK506 binding protein 7 [Source:HGNC Symbol;Acc:3723]	473	85.6236786469	0.477217285478	6.71110335468e-88
GLIPR2	GLI pathogenesis-related 2 [Source:HGNC Symbol;Acc:18007]	306	89.5424836601	0.473722481151	1.80179088627e-86
NRP1	neuropilin 1 [Source:HGNC Symbol;Acc:8004]	629	73.9268680445	0.473235836577	2.84030837503e-86
KCTD10	potassium channel tetramerisation domain containing 10 [Source:HGNC Symbol;Acc:23236]	330	90.0	0.472274523167	6.96443816127e-86
AKAP2	A kinase (PRKA) anchor protein 2 [Source:HGNC Symbol;Acc:372]	129	82.1705426357	0.472068371526	8.43832330937e-86
LEPREL2	leprecan-like 2 [Source:HGNC Symbol;Acc:19318]	414	81.1594202899	0.471136418553	2.00649056469e-85
EMILIN2	elastin microfibril interfacer 2 [Source:HGNC Symbol;Acc:19881]	482	91.4937759336	0.470186287416	4.83903614029e-85
CDC42EP3	CDC42 effector protein (Rho GTPase binding) 3 [Source:HGNC Symbol;Acc:16943]	682	74.780058651	0.469762798466	7.15776674496e-85
COL4A5	collagen, type IV, alpha 5 [Source:HGNC Symbol;Acc:2207]	679	80.706921944	0.468965302354	1.49382867806e-84
BNIP2	BCL2/adenovirus E1B 19kDa interacting protein 2 [Source:HGNC Symbol;Acc:1083]	409	85.5745721271	0.46853113531	2.22791061997e-84
ZFP36L1	zinc finger protein 36, C3H type-like 1 [Source:HGNC Symbol;Acc:1107]	577	78.3362218371	0.468481489135	2.33202014506e-84
AEBP1	AE binding protein 1 [Source:HGNC Symbol;Acc:303]	655	85.1908396947	0.468255323234	2.87109939821e-84
FSCN1	fascin homolog 1, actin-bundling protein (Strongylocentrotus purpuratus) [Source:HGNC Symbol;Acc:11148]	500	72.2	0.468115592914	3.26447621584e-84
ANXA3	annexin A3 [Source:HGNC Symbol;Acc:541]	681	71.3656387665	0.466766863562	1.12396262226e-83
ACOT9	acyl-CoA thioesterase 9 [Source:HGNC Symbol;Acc:17152]	297	84.1750841751	0.463194906788	2.89199996555e-82
FGFR1	fibroblast growth factor receptor 1 [Source:HGNC Symbol;Acc:3688]	727	79.0921595598	0.462191958983	7.14868545046e-82
CAPN2	calpain 2, (m/II) large subunit [Source:HGNC Symbol;Acc:1479]	560	84.6428571429	0.461543315107	1.28148874419e-81
TSPO	translocator protein (18kDa) [Source:HGNC Symbol;Acc:1158]	603	79.9336650083	0.461516936689	1.31223572001e-81
GNAI2	guanine nucleotide binding protein (G protein), alpha inhibiting activity polypeptide 2 [Source:HGNC Symbol;Acc:4385]	466	89.6995708155	0.461198468902	1.74685727167e-81
CD97	CD97 molecule [Source:HGNC Symbol;Acc:1711]	490	84.0816326531	0.460681480273	2.77762057186e-81
TGFBR2	transforming growth factor, beta receptor II (70/80kDa) [Source:HGNC Symbol;Acc:11773]	573	76.2652705061	0.460610970873	2.95880333507e-81
JDP2	Jun dimerization protein 2 [Source:HGNC Symbol;Acc:17546]	397	81.8639798489	0.460341864208	3.76527562425e-81
PTRF	polymerase I and transcript release factor [Source:HGNC Symbol;Acc:9688]	481	90.4365904366	0.457832397554	3.52746211736e-80
PRRX1	paired related homeobox 1 [Source:HGNC Symbol;Acc:9142]	596	82.3825503356	0.457396992904	5.19070441856e-80
LYZ2	LYZ2	390	88.9743589744	0.456524826774	1.1234307309e-79
TM4SF1	transmembrane 4 L six family member 1 [Source:HGNC Symbol;Acc:11853]	655	74.1984732824	0.454731470135	5.4573472998e-79
PTPLAD2	protein tyrosine phosphatase-like A domain containing 2 [Source:HGNC Symbol;Acc:20920]	247	85.020242915	0.454713522616	5.54409394899e-79
MFGE8	milk fat globule-EGF factor 8 protein [Source:HGNC Symbol;Acc:7036]	497	74.8490945674	0.45411475551	9.37762061835e-79
CTSK	cathepsin K [Source:HGNC Symbol;Acc:2536]	524	87.4045801527	0.453583313195	1.49385344867e-78
BICD2	bicaudal D homolog 2 (Drosophila) [Source:HGNC Symbol;Acc:17208]	476	82.7731092437	0.451164442031	1.23078684641e-77
MSRB3	methionine sulfoxide reductase B3 [Source:HGNC Symbol;Acc:27375]	334	80.8383233533	0.450822408486	1.65612977813e-77
CRTAP	cartilage associated protein [Source:HGNC Symbol;Acc:2379]	580	87.0689655172	0.449623927279	4.67347326362e-77
DAB2	disabled homolog 2, mitogen-responsive phosphoprotein (Drosophila) [Source:HGNC Symbol;Acc:2662]	776	79.8969072165	0.448250455827	1.5267164353e-76
KLF6	Kruppel-like factor 6 [Source:HGNC Symbol;Acc:2235]	669	78.4753363229	0.447965060631	1.9511569784e-76
ZEB2	zinc finger E-box binding homeobox 2 [Source:HGNC Symbol;Acc:14881]	519	84.0077071291	0.447378259962	3.22862482391e-76
MXRA8	matrix-remodelling associated 8 [Source:HGNC Symbol;Acc:7542]	369	83.1978319783	0.447040910889	4.31089973876e-76
RFTN1	raftlin, lipid raft linker 1 [Source:HGNC Symbol;Acc:30278]	312	79.8076923077	0.444769876637	2.99295706679e-75
CAV2	caveolin 2 [Source:HGNC Symbol;Acc:1528]	618	73.4627831715	0.444585679696	3.50005715369e-75
CALD1	caldesmon 1 [Source:HGNC Symbol;Acc:1441]	739	73.0717185386	0.444116548244	5.21207827379e-75
CTSC	cathepsin C [Source:HGNC Symbol;Acc:2528]	736	72.4184782609	0.442627573248	1.83695228693e-74
TLN1	talin 1 [Source:HGNC Symbol;Acc:11845]	471	76.8577494692	0.442129394095	2.79597940448e-74
COL3A1	collagen, type III, alpha 1 [Source:HGNC Symbol;Acc:2201]	886	80.6997742664	0.440499263952	1.09995680448e-73
KLF2	Kruppel-like factor 2 (lung) [Source:HGNC Symbol;Acc:6347]	603	79.6019900498	0.440296536337	1.30354234949e-73
B2M	beta-2-microglobulin [Source:HGNC Symbol;Acc:914]	502	76.4940239044	0.439879624665	1.84771342727e-73
LAMC1	laminin, gamma 1 (formerly LAMB2) [Source:HGNC Symbol;Acc:6492]	643	82.4261275272	0.436927562163	2.15480422836e-72
TUBB6	tubulin, beta 6 class V [Source:HGNC Symbol;Acc:20776]	620	85.9677419355	0.436332486205	3.52510583314e-72
RRAS	related RAS viral (r-ras) oncogene homolog [Source:HGNC Symbol;Acc:10447]	430	85.3488372093	0.435591489005	6.49768793649e-72
OGN	osteoglycin [Source:HGNC Symbol;Acc:8126]	520	81.3461538462	0.434660376833	1.39814207443e-71
SDPR	serum deprivation response [Source:HGNC Symbol;Acc:10690]	621	75.3623188406	0.430770603738	3.34665326575e-70
COLEC12	collectin sub-family member 12 [Source:HGNC Symbol;Acc:16016]	573	85.5148342059	0.428915605039	1.49950530254e-69
ACOT10	ACOT10	132	86.3636363636	0.428671406078	1.82553430841e-69
ECM1	extracellular matrix protein 1 [Source:HGNC Symbol;Acc:3153]	578	64.8788927336	0.427046433817	6.73225282898e-69
S1PR3	sphingosine-1-phosphate receptor 3 [Source:HGNC Symbol;Acc:3167]	261	89.6551724138	0.42526744676	2.78676861697e-68
RUNX2	runt-related transcription factor 2 [Source:HGNC Symbol;Acc:10472]	423	70.9219858156	0.424506704487	5.10262193836e-68
TMEM123	transmembrane protein 123 [Source:HGNC Symbol;Acc:30138]	389	82.5192802057	0.422587525342	2.33086472061e-67
COL6A2	collagen, type VI, alpha 2 [Source:HGNC Symbol;Acc:2212]	655	87.1755725191	0.42232072854	2.87667780388e-67
LAMB1	laminin, beta 1 [Source:HGNC Symbol;Acc:6486]	500	78.6	0.421975629413	3.77538031738e-67
FKBP10	FK506 binding protein 10, 65 kDa [Source:HGNC Symbol;Acc:18169]	539	88.6827458256	0.421948034155	3.85829994354e-67
CD248	CD248 molecule, endosialin [Source:HGNC Symbol;Acc:18219]	347	83.2853025937	0.421606705702	5.04695175482e-67
SLC12A4	solute carrier family 12 (potassium/chloride transporters), member 4 [Source:HGNC Symbol;Acc:10913]	322	82.9192546584	0.421205597981	6.91699145097e-67
GLIPR1	GLI pathogenesis-related 1 [Source:HGNC Symbol;Acc:17001]	607	79.5716639209	0.420753973041	9.85878898782e-67
FAM198B	family with sequence similarity 198, member B [Source:HGNC Symbol;Acc:25312]	225	76.4444444444	0.420044406379	1.71853295262e-66
F2R	coagulation factor II (thrombin) receptor [Source:HGNC Symbol;Acc:3537]	578	77.8546712803	0.419585572159	2.45983582601e-66
MMP14	matrix metallopeptidase 14 (membrane-inserted) [Source:HGNC Symbol;Acc:7160]	486	87.6543209877	0.419382336823	2.88280836381e-66
TMSB10	thymosin beta 10 [Source:HGNC Symbol;Acc:11879]	462	89.3939393939	0.419044338829	3.75243844131e-66
ITGB1	integrin, beta 1 (fibronectin receptor, beta polypeptide, antigen CD29 includes MDF2, MSK12) [Source:HGNC Symbol;Acc:6153]	627	79.2663476874	0.417613592901	1.14165290331e-65
PLSCR3	phospholipid scramblase 3 [Source:HGNC Symbol;Acc:16495]	437	88.3295194508	0.417535356692	1.21308191433e-65
GNB4	guanine nucleotide binding protein (G protein), beta polypeptide 4 [Source:HGNC Symbol;Acc:20731]	451	78.7139689579	0.41655734335	2.58685471178e-65
DRAM1	DNA-damage regulated autophagy modulator 1 [Source:HGNC Symbol;Acc:25645]	225	81.7777777778	0.415908793699	4.26837693919e-65
IFI205	IFI205	82	90.243902439	0.414736643379	1.05227842938e-64
DCN	decorin [Source:HGNC Symbol;Acc:2705]	711	77.2151898734	0.414329056684	1.43889219023e-64
RHOC	ras homolog family member C [Source:HGNC Symbol;Acc:669]	544	83.2720588235	0.413309359648	3.14190329729e-64
LTBP2	latent transforming growth factor beta binding protein 2 [Source:HGNC Symbol;Acc:6715]	527	80.6451612903	0.412130417631	7.72435441274e-64
MGP	matrix Gla protein [Source:HGNC Symbol;Acc:7060]	679	77.3195876289	0.410223435263	3.28455956912e-63
SERPINE1	serpin peptidase inhibitor, clade E (nexin, plasminogen activator inhibitor type 1), member 1 [Source:HGNC Symbol;Acc:8583]	631	76.0697305864	0.410141024992	3.4958345696e-63
ANXA5	annexin A5 [Source:HGNC Symbol;Acc:543]	666	87.0870870871	0.409590221479	5.30039079671e-63
RAB34	RAB34, member RAS oncogene family [Source:HGNC Symbol;Acc:16519]	563	87.7442273535	0.408578009596	1.13658488085e-62
PROCR	protein C receptor, endothelial [Source:HGNC Symbol;Acc:9452]	536	77.2388059701	0.408359606857	1.33947507815e-62
CSF1	colony stimulating factor 1 (macrophage) [Source:HGNC Symbol;Acc:2432]	285	78.5964912281	0.407523993858	2.50821699622e-62
AMOTL2	angiomotin like 2 [Source:HGNC Symbol;Acc:17812]	442	83.9366515837	0.407330910036	2.89871029031e-62
TIMP3	TIMP metallopeptidase inhibitor 3 [Source:HGNC Symbol;Acc:11822]	721	79.334257975	0.405092604313	1.54046667839e-61
FZD1	frizzled family receptor 1 [Source:HGNC Symbol;Acc:4038]	568	82.7464788732	0.403752691032	4.16176691531e-61
PCDH18	protocadherin 18 [Source:HGNC Symbol;Acc:14268]	394	88.3248730964	0.402942853757	7.5716814656e-61
MICAL1	microtubule associated monoxygenase, calponin and LIM domain containing 1 [Source:HGNC Symbol;Acc:20619]	511	80.626223092	0.402453532407	1.08614914911e-60
TMEM43	transmembrane protein 43 [Source:HGNC Symbol;Acc:28472]	371	93.8005390836	0.402009062161	1.50659424903e-60
TGFBR3	transforming growth factor, beta receptor III [Source:HGNC Symbol;Acc:11774]	607	76.4415156507	0.400831019636	3.57763985737e-60
COL4A1	collagen, type IV, alpha 1 [Source:HGNC Symbol;Acc:2202]	686	77.1137026239	0.400696922044	3.94689362174e-60
OSR1	odd-skipped related 1 (Drosophila) [Source:HGNC Symbol;Acc:8111]	332	83.4337349398	0.400601999435	4.23097162089e-60
CYR61	cysteine-rich, angiogenic inducer, 61 [Source:HGNC Symbol;Acc:2654]	665	79.2481203008	0.400418175487	4.84023928623e-60
MARVELD1	MARVEL domain containing 1 [Source:HGNC Symbol;Acc:28674]	517	87.0406189555	0.400368827487	5.0181698767e-60
ITPRIP	inositol 1,4,5-trisphosphate receptor interacting protein [Source:HGNC Symbol;Acc:29370]	208	83.6538461538	0.40034660672	5.10040109267e-60
TMSB4X	thymosin beta 4, X-linked [Source:HGNC Symbol;Acc:11881]	360	89.4444444444	0.3991730123	1.20132707911e-59
SLIT2	slit homolog 2 (Drosophila) [Source:HGNC Symbol;Acc:11086]	528	75.1893939394	0.398869113138	1.49885726013e-59
FIBIN	fin bud initiation factor homolog (zebrafish) [Source:HGNC Symbol;Acc:33747]	235	83.4042553191	0.398792384673	1.58492054951e-59
PDGFRA	platelet-derived growth factor receptor, alpha polypeptide [Source:HGNC Symbol;Acc:8803]	659	83.4597875569	0.398477110364	1.99329383229e-59
CASP12	caspase 12 (gene/pseudogene) [Source:HGNC Symbol;Acc:19004]	147	89.7959183673	0.397386562354	4.3967942536e-59
MAP4K4	mitogen-activated protein kinase kinase kinase kinase 4 [Source:HGNC Symbol;Acc:6866]	583	78.5591766724	0.396099445927	1.11422478622e-58
MRC2	mannose receptor, C type 2 [Source:HGNC Symbol;Acc:16875]	423	87.2340425532	0.39543429052	1.79873426097e-58
FAP	fibroblast activation protein, alpha [Source:HGNC Symbol;Acc:3590]	454	84.140969163	0.395066329213	2.34327874379e-58
MCAM	melanoma cell adhesion molecule [Source:HGNC Symbol;Acc:6934]	498	80.7228915663	0.393829327791	5.68695947358e-58
PDLIM4	PDZ and LIM domain 4 [Source:HGNC Symbol;Acc:16501]	403	88.8337468983	0.39212995932	1.9106882842e-57
THBS2	thrombospondin 2 [Source:HGNC Symbol;Acc:11786]	569	80.8435852373	0.39161199178	2.76055013843e-57
HTRA1	HtrA serine peptidase 1 [Source:HGNC Symbol;Acc:9476]	511	72.9941291585	0.391493435675	3.00284493473e-57
PTX3	pentraxin 3, long [Source:HGNC Symbol;Acc:9692]	516	83.3333333333	0.391245775352	3.57939729649e-57
ADAM12	ADAM metallopeptidase domain 12 [Source:HGNC Symbol;Acc:190]	371	92.1832884097	0.390536653787	5.91359376463e-57
SRGN	serglycin [Source:HGNC Symbol;Acc:9361]	498	79.1164658635	0.389857756169	9.55210338014e-57
CRISPLD2	cysteine-rich secretory protein LCCL domain containing 2 [Source:HGNC Symbol;Acc:25248]	574	80.8362369338	0.38968459932	1.07928334737e-56
TGFB1I1	transforming growth factor beta 1 induced transcript 1 [Source:HGNC Symbol;Acc:11767]	540	87.4074074074	0.388913387228	1.85765541461e-56
ARPC1B	actin related protein 2/3 complex, subunit 1B, 41kDa [Source:HGNC Symbol;Acc:704]	653	82.8483920368	0.387328898047	5.6430466113e-56
JUN	jun proto-oncogene [Source:HGNC Symbol;Acc:6204]	722	77.0083102493	0.386480560731	1.02042739254e-55
RBMS2	RNA binding motif, single stranded interacting protein 2 [Source:HGNC Symbol;Acc:9909]	369	87.5338753388	0.384953705217	2.95061769304e-55
SVEP1	sushi, von Willebrand factor type A, EGF and pentraxin domain containing 1 [Source:HGNC Symbol;Acc:15985]	201	89.552238806	0.38451892569	3.98818133551e-55
COL8A1	collagen, type VIII, alpha 1 [Source:HGNC Symbol;Acc:2215]	528	84.6590909091	0.382917511836	1.20523239939e-54
MYL12A	myosin, light chain 12A, regulatory, non-sarcomeric [Source:HGNC Symbol;Acc:16701]	220	87.7272727273	0.381486097608	3.22193615911e-54
RCN3	reticulocalbin 3, EF-hand calcium binding domain [Source:HGNC Symbol;Acc:21145]	403	84.8635235732	0.381135549312	4.09613475948e-54
LYZ1	LYZ1	343	81.9241982507	0.37960859036	1.16151217928e-53
THBD	thrombomodulin [Source:HGNC Symbol;Acc:11784]	540	79.0740740741	0.379360221749	1.3753764014e-53
TLR4	toll-like receptor 4 [Source:HGNC Symbol;Acc:11850]	451	82.0399113082	0.378918944519	1.85639510811e-53
LY6C1	LY6C1	140	70.0	0.378578811371	2.33844969566e-53
PTGS2	prostaglandin-endoperoxide synthase 2 (prostaglandin G/H synthase and cyclooxygenase) [Source:HGNC Symbol;Acc:9605]	528	73.8636363636	0.378204121001	3.01462706525e-53
FBLN1	fibulin 1 [Source:HGNC Symbol;Acc:3600]	595	77.9831932773	0.377068064981	6.49822409175e-53
GYPC	glycophorin C (Gerbich blood group) [Source:HGNC Symbol;Acc:4704]	517	74.4680851064	0.375877275145	1.44878051543e-52
ZEB1	zinc finger E-box binding homeobox 1 [Source:HGNC Symbol;Acc:11642]	449	78.1737193764	0.374849764272	2.88600336261e-52
IFI27L2A	IFI27L2A	112	83.9285714286	0.374601115459	3.4084834286e-52
VCL	vinculin [Source:HGNC Symbol;Acc:12665]	427	83.1381733021	0.373933557952	5.32426802996e-52
RALB	v-ral simian leukemia viral oncogene homolog B (ras related; GTP binding protein) [Source:HGNC Symbol;Acc:9840]	410	84.3902439024	0.373785666331	5.87639077669e-52
FN1	fibronectin 1 [Source:HGNC Symbol;Acc:3778]	777	74.0025740026	0.372788857061	1.14116700497e-51
BMPER	BMP binding endothelial regulator [Source:HGNC Symbol;Acc:24154]	335	73.7313432836	0.371787420999	2.21772629174e-51
TGFBI	transforming growth factor, beta-induced, 68kDa [Source:HGNC Symbol;Acc:11771]	744	81.4516129032	0.37154376908	2.60591958711e-51
SRPX2	sushi-repeat containing protein, X-linked 2 [Source:HGNC Symbol;Acc:30668]	341	79.1788856305	0.371437489387	2.79575385075e-51
FCGRT	Fc fragment of IgG, receptor, transporter, alpha [Source:HGNC Symbol;Acc:3621]	583	69.9828473413	0.369054244286	1.34365436321e-50
LIMS1	LIM and senescent cell antigen-like domains 1 [Source:HGNC Symbol;Acc:6616]	379	85.4881266491	0.368236707027	2.29532706037e-50
MYH9	myosin, heavy chain 9, non-muscle [Source:HGNC Symbol;Acc:7579]	475	82.1052631579	0.367902047778	2.8565895739e-50
IGFBP7	insulin-like growth factor binding protein 7 [Source:HGNC Symbol;Acc:5476]	683	74.5241581259	0.367866703714	2.92330928567e-50
PTGIS	prostaglandin I2 (prostacyclin) synthase [Source:HGNC Symbol;Acc:9603]	578	70.7612456747	0.367576033358	3.5341807e-50
ADAMTS5	ADAM metallopeptidase with thrombospondin type 1 motif, 5 [Source:HGNC Symbol;Acc:221]	432	82.8703703704	0.367554433103	3.58434412599e-50
LUM	lumican [Source:HGNC Symbol;Acc:6724]	746	80.0268096515	0.367526026415	3.65139400951e-50

## Sheet: Concordant KEGG pathways
Group	P-value
hsa04510:Focal adhesion	9.16661016987e-19
hsa04512:ECM-receptor interaction	6.4052158734e-17
hsa05200:Pathways in cancer	3.43976196064e-07
hsa04810:Regulation of actin cytoskeleton	1.3915524806e-06
hsa05222:Small cell lung cancer	0.00019323959501
hsa05210:Colorectal cancer	0.00113453417447
hsa04350:TGF-beta signaling pathway	0.00792315508761
hsa04540:Gap junction	0.00996631185875
hsa04670:Leukocyte transendothelial migration	0.0247517382986
hsa05410:Hypertrophic cardiomyopathy (HCM)	0.0331752110504
hsa04010:MAPK signaling pathway	0.0387353138203
hsa05414:Dilated cardiomyopathy	0.0438843023795
hsa05130:Pathogenic Escherichia coli infection	0.0499091803656

## Sheet: Concordant COG Ontology
Group	P-value
Cytoskeleton	0.000768618914351
Signal transduction mechanisms	0.000920170008924
Cell division and chromosome partitioning	0.000920170008924
General function prediction only	0.00749347807393

## Sheet: Concordant TISSUE
Group	P-value
Placenta	3.73308859358e-16
Fibroblast	1.1839365519e-08
Brain	2.29909048393e-06
Plasma	2.50854027866e-05
Lung	3.21319479448e-05
Endothelial cell	8.7847316756e-05
Platelet	9.849810406e-05
Aorta	0.000145941536851
Liver	0.00125506993997
Skin	0.00130598259164
Osteosarcoma	0.00189408552618
Pancreas	0.00280014062149
Aortic endothelium	0.00291753415659
Adipocyte	0.00371824009737
Cartilage	0.00416383474335
Aorta endothelial cell	0.00416423150191
Hair follicle dermal papilla	0.00464044378936
Spleen	0.00625086889989
Uterus	0.0182110678907
Human fetal kidney	0.0190560914366
Fetal brain cortex	0.0222460184982
Glioblastoma	0.0235634873001
Embryo	0.0278576814805
Endometrium	0.0278617382946
Kidney	0.0289234822801
Foreskin	0.0320713804719
Synovial fluid	0.0374312175755
Urine	0.0393288410387
Blood	0.0427821909897
Macrophage	0.0452598293099
Glial tumor	0.04834058465
Aortic smooth muscle	0.0495929737821
Periodontal ligament	0.0495929737821
