# Supplementary material for: The CO-Regulation Database (CORD): A Tool to Identify Coordinately Expressed Genes
Source: PLoS One. 2014 Mar 5;9(3):e90408. doi: 10.1371/journal.pone.0090408 (PMC3944024; doi:10.1371/journal.pone.0090408)
Supplement: File S3 — An Excel file (MYOD1.xls)containing the CORD results for MYOD1 using the following settings: human and mouse experiments used, p value of less than 0.01, fold change threshold of greater than 2, tissue comparisions included, and the minimum number of samples per experiment is 3. (XLS) [file pone.0090408.s004.xls]

## Sheet: Experiments
CordID	Database	Datbase ID	Fold Change	Species	Title	Factor	Group 1	Group 2
E-GEOD-25169_42_1_2_mod.txt	ArrayExpress	E-GEOD-25169	2.7742212125	Mus musculus	Chromatin remodeling enzyme Brg1 is required for mouse lens fiber cell terminal differentiation and their denucleation	FactorValue..AGE.	E15.5	P1
GDS3142_tissue_5_9_mod.txt	GEO	GDS3142	-1.55494592493	Mus musculus	Various tissues	tissue	diaphragm	heart
GDS2091_cell.type_1_2_mod.txt	GEO	GDS2091	-2.83314607783	Mus musculus	DNA demethylation effect on terminally differentiated cells	cell.type	chondrocyte	fibroblast
GDS63_time_4_10_mod.txt	GEO	GDS63	1.10352391753	Rattus norvegicus	Spinal cord injury and regeneration time course: at T9 (RG-U34A)	time	14 d	4 h
E-GEOD-30138_43_4_5_mod.txt	ArrayExpress	E-GEOD-30138	-3.62719013257	Mus musculus	Global Gene Expression Analysis of Murine Limb Development	FactorValue..DEVELOPMENTAL.STAGE.	E13.5	E9.5
GDS1490_tissue_26_29_mod.txt	GEO	GDS1490	-1.01530447146	Mus musculus	Neural tissue profiling	tissue	retina	spleen
GDS589_tissue_4_18_mod.txt	GEO	GDS589	2.41029692355	Rattus norvegicus	Multiple normal tissue gene expression across strains	tissue	cerebellum	nucleus accumbens core
GDS3142_tissue_13_18_mod.txt	GEO	GDS3142	-1.52539215484	Mus musculus	Various tissues	tissue	muscle	seminal vesicle
GDS1490_tissue_22_27_mod.txt	GEO	GDS1490	3.15491858908	Mus musculus	Neural tissue profiling	tissue	periaqueductal gray	skeletal muscle
E-MEXP-2320_39_2_3_mod.txt	ArrayExpress	E-MEXP-2320	1.61675565559	Mus musculus	Transcription profiling of mouse long-lived S6K1 -/- strain females compared to wild types	Factor.Value.OrganismPart.	liver	muscle
E-GEOD-25169_45_1_2_mod.txt	ArrayExpress	E-GEOD-25169	-3.09172967673	Mus musculus	Chromatin remodeling enzyme Brg1 is required for mouse lens fiber cell terminal differentiation and their denucleation	FactorValue..VARIATION.	Brg1 cKO	not specified
GDS256_time_10_13_mod.txt	GEO	GDS256	-2.42355661334	Rattus norvegicus	Pharmacogenomic effect of corticosteroid in skeletal muscle	time	48 hour	5 hour
E-GEOD-32334_31_1_4_mod.txt	ArrayExpress	E-GEOD-32334	2.44164766762	Mus musculus	Developmental timecourse of mouse ocular lens and whole embryo control	FactorValue..STAGE.	E10.5	E11.5-13.5
E-GEOD-33199_29_3_10_mod.txt	ArrayExpress	E-GEOD-33199	4.12956227448	Mus musculus	A mouse model of the most aggressive subgroup of human medulloblastoma [Mouse430 2]	FactorValue..VARIATION.	cmyc MB - GFP positive	Ptc+/-, Cdkn2c-/-
E-GEOD-20577_37_1_2_mod.txt	ArrayExpress	E-GEOD-20577	3.19113578968	Mus musculus	Gestational taurine supplementation of mice: effect on offspring gene expression in liver and skeletal muscle	FactorValue..TISSUE.	liver	quadriceps muscle
GDS3142_tissue_8_20_mod.txt	GEO	GDS3142	-1.93972764918	Mus musculus	Various tissues	tissue	fetus	spleen
E-GEOD-33199_29_2_10_mod.txt	ArrayExpress	E-GEOD-33199	4.42034477235	Mus musculus	A mouse model of the most aggressive subgroup of human medulloblastoma [Mouse430 2]	FactorValue..VARIATION.	cmyc MB - GFP negative	Ptc+/-, Cdkn2c-/-
GDS3142_tissue_5_20_mod.txt	GEO	GDS3142	-2.08713077952	Mus musculus	Various tissues	tissue	diaphragm	spleen
E-GEOD-22506_20_2_3_mod.txt	ArrayExpress	E-GEOD-22506	2.06262591003	Mus musculus	Unacylated Ghrelin Rapidly Modulates Lipogenic and Insulin Signaling Pathway Gene Expression in Metabolically Active Tissues of GHSR Deleted Mice	Factor.Value..TISSUE.	Liver	Skeletal muscle (M. vastus lateralis)
GDS2688_time_1_5_mod.txt	GEO	GDS2688	-2.84012422129	Rattus norvegicus	Skeletal muscle response to chronic corticosteroid exposure: time course	time	0 h	18 h
GDS1490_tissue_14_27_mod.txt	GEO	GDS1490	2.83244595003	Mus musculus	Neural tissue profiling	tissue	hypothalamus	skeletal muscle
GDS1490_tissue_24_27_mod.txt	GEO	GDS1490	2.6051193361	Mus musculus	Neural tissue profiling	tissue	pituitary	skeletal muscle
E-GEOD-18649_37_2_3_mod.txt	ArrayExpress	E-GEOD-18649	-5.39870806902	Mus musculus	Molecular Profiling of the Developing Axial Skeleton: A role for Tgfbr2 in the Development of the Intervertebral Disc.	FactorValue..TISSUE.	not specified	Vertebrae
E-GEOD-25098_32_1_3_mod.txt	ArrayExpress	E-GEOD-25098	3.08836133856	Mus musculus	Rhabdomyosarcoma can be initiated in activated Pax7+ Muscle Progenitor Cells	FactorValue..GENOTYPE.VARIATION.	LSL-KrasG12D;Trp53Flox/Flox	Pax7-CreER/+; LSL-KrasG12D;Trp53Flox/Flox
E-GEOD-19855_48_1_2_mod.txt	ArrayExpress	E-GEOD-19855	-1.06189566446	Mus musculus	Molecular Characterization of Treponema denticola infection-induced bone and soft tissue transcriptional profiles	FactorValue..TISSUE.	calvarial bone	soft tissue overlying calvarial bone
E-GEOD-16728_33_1_3_mod.txt	ArrayExpress	E-GEOD-16728	1.2380287127	Homo sapiens	Transcription profiling of whole blood from sickle-cell disease patients using globin mRNA reduction	Factor.Value.Sample.Preparation.	Globin-depleted RNA	total RNA
GDS1490_tissue_1_27_mod.txt	GEO	GDS1490	2.96137664446	Mus musculus	Neural tissue profiling	tissue	adrenal	skeletal muscle
GDS3142_tissue_8_22_mod.txt	GEO	GDS3142	-1.60274630811	Mus musculus	Various tissues	tissue	fetus	thymus
E-GEOD-18649_35_2_3_mod.txt	ArrayExpress	E-GEOD-18649	-5.55562493448	Mus musculus	Molecular Profiling of the Developing Axial Skeleton: A role for Tgfbr2 in the Development of the Intervertebral Disc.	FactorValue..AGENT.	none	not specified
E-GEOD-11990_35_1_2_mod.txt	ArrayExpress	E-GEOD-11990	1.33341683433	Mus musculus	Gene expression profiling of mouse p53-deficient epidermal carcinoma defines molecular determinants of human cancer malignancy (training dataset)	FactorValue..HISTOLOGICAL.SUBTYPE.	mixed	not specified
GDS1490_tissue_23_27_mod.txt	GEO	GDS1490	2.34525192725	Mus musculus	Neural tissue profiling	tissue	perirhinal cortex	skeletal muscle
GDS3442_age_1_2_mod.txt	GEO	GDS3442	1.3966165448	Mus musculus	Embryonic brain development	age	E11.5	E13.5
GDS2687_tissue_1_2_mod.txt	GEO	GDS2687	2.35893785483	Mus musculus	Kruppel-like factor 15 deficient liver and skeletal muscle response to fasting	tissue	liver	skeletal muscle
GDS1490_tissue_9_27_mod.txt	GEO	GDS1490	2.36675236194	Mus musculus	Neural tissue profiling	tissue	entorhinal cortex	skeletal muscle
E-GEOD-30138_43_2_5_mod.txt	ArrayExpress	E-GEOD-30138	-2.88624355091	Mus musculus	Global Gene Expression Analysis of Murine Limb Development	FactorValue..DEVELOPMENTAL.STAGE.	E11.5	E9.5
GDS3142_tissue_5_14_mod.txt	GEO	GDS3142	-2.04628917412	Mus musculus	Various tissues	tissue	diaphragm	ovary
E-GEOD-24207_47_5_14_mod.txt	ArrayExpress	E-GEOD-24207	-3.17823185566	Mus musculus	mRNA analysis in different mouse tissues	FactorValue..TISSUE.	diaphragm	pancreatic acini
GDS1490_tissue_27_32_mod.txt	GEO	GDS1490	-3.01584736507	Mus musculus	Neural tissue profiling	tissue	skeletal muscle	testes
GDS1607_tissue_1_3_mod.txt	GEO	GDS1607	-1.25077090771	Mus musculus	Muscle glycogen content effect on skeletal muscle	tissue	anterior tibialis	medial gastrocnemius
E-GEOD-33199_29_7_10_mod.txt	ArrayExpress	E-GEOD-33199	4.09739366428	Mus musculus	A mouse model of the most aggressive subgroup of human medulloblastoma [Mouse430 2]	FactorValue..VARIATION.	p53-/-, Cdkn2c-/-, Math1-GFP FACS sort for GFP+	Ptc+/-, Cdkn2c-/-
GDS3142_tissue_9_13_mod.txt	GEO	GDS3142	1.26153540382	Mus musculus	Various tissues	tissue	heart	muscle
GDS1490_tissue_8_26_mod.txt	GEO	GDS1490	1.19590945992	Mus musculus	Neural tissue profiling	tissue	dentate gyrus	retina
E-GEOD-24207_47_12_14_mod.txt	ArrayExpress	E-GEOD-24207	-2.65835667465	Mus musculus	mRNA analysis in different mouse tissues	FactorValue..TISSUE.	muscle	pancreatic acini
GDS3142_tissue_5_22_mod.txt	GEO	GDS3142	-1.75014943845	Mus musculus	Various tissues	tissue	diaphragm	thymus
GDS63_time_4_11_mod.txt	GEO	GDS63	1.56135787546	Rattus norvegicus	Spinal cord injury and regeneration time course: at T9 (RG-U34A)	time	14 d	7 d
GDS3142_tissue_5_16_mod.txt	GEO	GDS3142	-1.94476921008	Mus musculus	Various tissues	tissue	diaphragm	placenta
GDS3113_tissue_13_21_mod.txt	GEO	GDS3113	5.00167018482	Homo sapiens	Various normal tissues	tissue	mammary gland	skeletal muscle
E-GEOD-16362_35_1_2_mod.txt	ArrayExpress	E-GEOD-16362	-1.30180018871	Mus musculus	ALS mice muscle gene expression data	FactorValue..GENDER.	female	female mice
GDS3142_tissue_5_11_mod.txt	GEO	GDS3142	-1.86072530681	Mus musculus	Various tissues	tissue	diaphragm	liver
E-GEOD-19626_22_3_4_mod.txt	ArrayExpress	E-GEOD-19626	-3.32084641446	Mus musculus	Profiling gene expression in Vax2 knockout compared with wild type mice	Factor.Value..AGE.	E16.5	P60
GDS1490_tissue_27_29_mod.txt	GEO	GDS1490	-3.07377364711	Mus musculus	Neural tissue profiling	tissue	skeletal muscle	spleen
GDS2158_agent_1_2_mod.txt	GEO	GDS2158	-1.67436219066	Mus musculus	Emery-Dreifuss muscular dystrophy model: regenerating skeletal muscle	agent	cardiotoxin	untreated
GDS589_tissue_5_25_mod.txt	GEO	GDS589	3.96901979457	Rattus norvegicus	Multiple normal tissue gene expression across strains	tissue	cerebral cortex	skeletal muscle
GDS256_time_13_15_mod.txt	GEO	GDS256	2.16329255066	Rattus norvegicus	Pharmacogenomic effect of corticosteroid in skeletal muscle	time	5 hour	72 hour
GDS1490_tissue_4_13_mod.txt	GEO	GDS1490	-1.07496459064	Mus musculus	Neural tissue profiling	tissue	brown adipose tissue	hippocampus CA3
GDS1490_tissue_13_27_mod.txt	GEO	GDS1490	3.12160035352	Mus musculus	Neural tissue profiling	tissue	hippocampus CA3	skeletal muscle
GDS3113_tissue_4_21_mod.txt	GEO	GDS3113	5.41706503951	Homo sapiens	Various normal tissues	tissue	colon	skeletal muscle
E-GEOD-28457_33_1_3_mod.txt	ArrayExpress	E-GEOD-28457	-1.98448662264	Mus musculus	Gene expression profile of E1A infected C2C12 myotubes	FactorValue..TREATMENT.	dl312 infected	dl928 infected
GDS3113_tissue_13_22_mod.txt	GEO	GDS3113	1.69000861938	Homo sapiens	Various normal tissues	tissue	mammary gland	skin
GDS3113_tissue_5_21_mod.txt	GEO	GDS3113	4.18791116158	Homo sapiens	Various normal tissues	tissue	fetal brain	skeletal muscle
GDS3113_tissue_13_19_mod.txt	GEO	GDS3113	1.11826845202	Homo sapiens	Various normal tissues	tissue	mammary gland	retina
GDS1490_tissue_17_26_mod.txt	GEO	GDS1490	1.02778315102	Mus musculus	Neural tissue profiling	tissue	liver	retina
E-MEXP-939_32_1_2_mod.txt	ArrayExpress	E-MEXP-939	1.39423585736	Mus musculus	Transcription profiling of skeletal muscle from wild type and PGC-1 beta transgenic mice	Factor.Value..genotype.	PGC-1 beta transgenic	wild_type
GDS1490_tissue_3_27_mod.txt	GEO	GDS1490	2.90985162656	Mus musculus	Neural tissue profiling	tissue	bed nucleus stria terminalis	skeletal muscle
E-GEOD-24207_47_4_12_mod.txt	ArrayExpress	E-GEOD-24207	3.09765935612	Mus musculus	mRNA analysis in different mouse tissues	FactorValue..TISSUE.	brain	muscle
E-GEOD-16362_39_2_4_mod.txt	ArrayExpress	E-GEOD-16362	-1.1567159133	Mus musculus	ALS mice muscle gene expression data	FactorValue..TISSUE.	14 week-old triceps	7 week-old gastrocnemius
GDS3142_tissue_2_13_mod.txt	GEO	GDS3142	1.84716325126	Mus musculus	Various tissues	tissue	adrenal gland	muscle
GDS565_tissue_1_3_mod.txt	GEO	GDS565	-1.08203735734	Mus musculus	Sex specific transcription in somatic and reproductive tissues	tissue	hypothalamus	liver
E-GEOD-24207_47_5_18_mod.txt	ArrayExpress	E-GEOD-24207	-2.78741989206	Mus musculus	mRNA analysis in different mouse tissues	FactorValue..TISSUE.	diaphragm	salivary gland
GDS1490_tissue_8_27_mod.txt	GEO	GDS1490	3.25437863557	Mus musculus	Neural tissue profiling	tissue	dentate gyrus	skeletal muscle
E-GEOD-24207_47_5_7_mod.txt	ArrayExpress	E-GEOD-24207	-2.81066139318	Mus musculus	mRNA analysis in different mouse tissues	FactorValue..TISSUE.	diaphragm	heart
E-GEOD-24207_47_5_20_mod.txt	ArrayExpress	E-GEOD-24207	-3.17348284668	Mus musculus	mRNA analysis in different mouse tissues	FactorValue..TISSUE.	diaphragm	small intestine
E-GEOD-34907_29_1_4_mod.txt	ArrayExpress	E-GEOD-34907	-4.35559668526	Mus musculus	Genetic and epigenetic determinants of neurogenesis and myogenesis [expression profiling]	FactorValue..CELL.TYPE.	Neuronally differentiated MEF cells	undifferentiated P19 cells
E-GEOD-16992_33_1_7_mod.txt	ArrayExpress	E-GEOD-16992	1.51096458602	Mus musculus	Expression Profiling of Early Myogenesis - Affymetrix Dataset	FactorValue..TIME.	-24hr_ctrl	1hr_CHX
E-GEOD-24207_47_12_13_mod.txt	ArrayExpress	E-GEOD-24207	-3.47137032315	Mus musculus	mRNA analysis in different mouse tissues	FactorValue..TISSUE.	muscle	ovary
GDS3113_tissue_13_24_mod.txt	GEO	GDS3113	1.0919561957	Homo sapiens	Various normal tissues	tissue	mammary gland	spinal cord
GDS1490_tissue_20_27_mod.txt	GEO	GDS1490	2.71477985377	Mus musculus	Neural tissue profiling	tissue	motor cortex	skeletal muscle
E-GEOD-24207_47_5_16_mod.txt	ArrayExpress	E-GEOD-24207	-3.54933512052	Mus musculus	mRNA analysis in different mouse tissues	FactorValue..TISSUE.	diaphragm	pituitary gland
GDS917_tissue_1_2_mod.txt	GEO	GDS917	2.41881778243	Homo sapiens	Whole blood RNA isolation and leukocyte RNA purification: comparison of methods	tissue	leukocyte	whole blood
E-GEOD-22506_20_1_3_mod.txt	ArrayExpress	E-GEOD-22506	2.16656023806	Mus musculus	Unacylated Ghrelin Rapidly Modulates Lipogenic and Insulin Signaling Pathway Gene Expression in Metabolically Active Tissues of GHSR Deleted Mice	Factor.Value..TISSUE.	Gonadal white adipose tissue	Skeletal muscle (M. vastus lateralis)
GDS1290_time_3_4_mod.txt	GEO	GDS1290	-1.94274614217	Homo sapiens	CD4+ lymphocyte polarization into Th1 and Th2 cells in the presence of TGFbeta: time course (HG-U95A)	time	48 h	6 h
E-GEOD-33199_29_9_10_mod.txt	ArrayExpress	E-GEOD-33199	2.98815813938	Mus musculus	A mouse model of the most aggressive subgroup of human medulloblastoma [Mouse430 2]	FactorValue..VARIATION.	p53floxed, Nestin-Cre, Cdkn2c-/-	Ptc+/-, Cdkn2c-/-
E-GEOD-37316_36_1_3_mod.txt	ArrayExpress	E-GEOD-37316	3.50957954366	Mus musculus	Gene expression data from postnatal day 7 subventricular zone (SVZ)	FactorValue..CELL.TYPE.	cancer stem cells (CSCs)	not specified
E-GEOD-22039_37_1_3_mod.txt	ArrayExpress	E-GEOD-22039	4.4881847054	Mus musculus	Gene expression data from forelimb buds of E10.5 mouse embryos	FactorValue..GENOTYPE.VARIATION.	GFP-	Pax3PAX3-FKHR/GFP
E-GEOD-37316_36_2_3_mod.txt	ArrayExpress	E-GEOD-37316	3.58433829377	Mus musculus	Gene expression data from postnatal day 7 subventricular zone (SVZ)	FactorValue..CELL.TYPE.	neural stem cells (NSCs)	not specified
GDS3142_tissue_6_13_mod.txt	GEO	GDS3142	1.50443750976	Mus musculus	Various tissues	tissue	embryonic stem cells	muscle
GDS589_tissue_5_18_mod.txt	GEO	GDS589	2.42667486042	Rattus norvegicus	Multiple normal tissue gene expression across strains	tissue	cerebral cortex	nucleus accumbens core
GDS3113_tissue_4_19_mod.txt	GEO	GDS3113	1.53366330671	Homo sapiens	Various normal tissues	tissue	colon	retina
GDS3113_tissue_19_21_mod.txt	GEO	GDS3113	3.8834017328	Homo sapiens	Various normal tissues	tissue	retina	skeletal muscle
E-GEOD-32334_31_4_5_mod.txt	ArrayExpress	E-GEOD-32334	-2.33061947831	Mus musculus	Developmental timecourse of mouse ocular lens and whole embryo control	FactorValue..STAGE.	E11.5-13.5	E12.5
GDS1490_tissue_6_27_mod.txt	GEO	GDS1490	2.5401577241	Mus musculus	Neural tissue profiling	tissue	cerebral cortex	skeletal muscle
GDS3113_tissue_21_25_mod.txt	GEO	GDS3113	-4.01312079228	Homo sapiens	Various normal tissues	tissue	skeletal muscle	spleen
E-TABM-1099_31_1_4_mod.txt	ArrayExpress	E-TABM-1099	1.03043014962	Mus musculus	Transcriptomic Analysis of Embryonic Mammary Cells	Factor.Value..PHENOTYPE.	epithelium	primordium
GDS3113_tissue_9_21_mod.txt	GEO	GDS3113	3.7529165553	Homo sapiens	Various normal tissues	tissue	heart	skeletal muscle
GDS3113_tissue_22_26_mod.txt	GEO	GDS3113	-1.52885495015	Homo sapiens	Various normal tissues	tissue	skin	testis
GDS3113_tissue_10_21_mod.txt	GEO	GDS3113	4.31978204136	Homo sapiens	Various normal tissues	tissue	kidney	skeletal muscle
E-GEOD-28598_45_1_3_mod.txt	ArrayExpress	E-GEOD-28598	2.0906011774	Mus musculus	Protection from obesity and diabetes by blockade of TGF-beta/Smad3 signaling	FactorValue..GENOTYPE.	not specified	WT
E-TABM-1099_31_2_3_mod.txt	ArrayExpress	E-TABM-1099	1.2963836137	Mus musculus	Transcriptomic Analysis of Embryonic Mammary Cells	Factor.Value..PHENOTYPE.	fibroblast	mesenchyme
E-TABM-1091_29_5_6_mod.txt	ArrayExpress	E-TABM-1091	-1.88315569709	Homo sapiens	Transcriptiion profiling by array of human ratiometric mixes of high quality RNA from different tissues using different labeling protocols to provide a mechanism for assessing process improvement	Factor.Value..MIX.	skeletal muscle only	Universal Human Reference RNA
GDS589_tissue_4_20_mod.txt	GEO	GDS589	2.46096980208	Rattus norvegicus	Multiple normal tissue gene expression across strains	tissue	cerebellum	nucleus accumbens whole
GDS589_tissue_4_9_mod.txt	GEO	GDS589	1.6335372256	Rattus norvegicus	Multiple normal tissue gene expression across strains	tissue	cerebellum	dorsal striatum
GDS1490_tissue_2_27_mod.txt	GEO	GDS1490	2.68903871529	Mus musculus	Neural tissue profiling	tissue	amygdala	skeletal muscle
E-GEOD-24628_22_2_3_mod.txt	ArrayExpress	E-GEOD-24628	3.97360507383	Mus musculus	Subtypes of medulloblastoma have distinct developmental origins	Factor.Value..CELL.TYPE.	medulloblastoma generated by activating Ctnnb1	medulloblastoma generated by inactivating Ptch1
E-GEOD-16438_47_1_2_mod.txt	ArrayExpress	E-GEOD-16438	4.07741429077	Mus musculus	Array profiling of dystrophin-deficient mice with a secondary glycosylation defect	FactorValue..TISSUE.	cardiac muscle	Gastrocnemius muscle
E-GEOD-32334_31_3_4_mod.txt	ArrayExpress	E-GEOD-32334	2.19134717641	Mus musculus	Developmental timecourse of mouse ocular lens and whole embryo control	FactorValue..STAGE.	E11.5	E11.5-13.5
E-GEOD-32334_31_1_6_mod.txt	ArrayExpress	E-GEOD-32334	1.02158003444	Mus musculus	Developmental timecourse of mouse ocular lens and whole embryo control	FactorValue..STAGE.	E10.5	E13.5
E-GEOD-32334_30_1_3_mod.txt	ArrayExpress	E-GEOD-32334	2.53738779594	Mus musculus	Developmental timecourse of mouse ocular lens and whole embryo control	FactorValue..ORGANISM.PART.	Lens	Whole embryo
E-GEOD-24628_23_2_3_mod.txt	ArrayExpress	E-GEOD-24628	-3.60196724538	Mus musculus	Subtypes of medulloblastoma have distinct developmental origins	Factor.Value..GENOTYPE.VARIATION.	Ptch1(+/-)	wildtype
GDS3142_tissue_8_11_mod.txt	GEO	GDS3142	-1.71332217646	Mus musculus	Various tissues	tissue	fetus	liver
GDS3442_age_2_3_mod.txt	GEO	GDS3442	-1.88545814237	Mus musculus	Embryonic brain development	age	E13.5	E9.5
GDS1607_tissue_2_3_mod.txt	GEO	GDS1607	2.96900787692	Mus musculus	Muscle glycogen content effect on skeletal muscle	tissue	liver	medial gastrocnemius
GDS1490_tissue_19_27_mod.txt	GEO	GDS1490	3.1280662232	Mus musculus	Neural tissue profiling	tissue	midbrain and diencephalon	skeletal muscle
E-GEOD-24207_47_12_23_mod.txt	ArrayExpress	E-GEOD-24207	-2.56488705198	Mus musculus	mRNA analysis in different mouse tissues	FactorValue..TISSUE.	muscle	thymus
GDS276_tissue_1_2_mod.txt	GEO	GDS276	4.2736047079	Rattus norvegicus	Muscle profiles	tissue	cardiac ventricle muscle	extraocular muscle
GDS3113_tissue_4_27_mod.txt	GEO	GDS3113	1.98227948433	Homo sapiens	Various normal tissues	tissue	colon	thymus
E-GEOD-11990_35_2_3_mod.txt	ArrayExpress	E-GEOD-11990	-1.25020363991	Mus musculus	Gene expression profiling of mouse p53-deficient epidermal carcinoma defines molecular determinants of human cancer malignancy (training dataset)	FactorValue..HISTOLOGICAL.SUBTYPE.	not specified	poorly differentiated
GDS3142_tissue_13_19_mod.txt	GEO	GDS3142	-1.36117157008	Mus musculus	Various tissues	tissue	muscle	small intestine
GDS917_protocol_1_2_mod.txt	GEO	GDS917	2.41881778243	Homo sapiens	Whole blood RNA isolation and leukocyte RNA purification: comparison of methods	protocol	buffy coat	PAXgene
GDS3113_tissue_21_22_mod.txt	GEO	GDS3113	-3.31166156544	Homo sapiens	Various normal tissues	tissue	skeletal muscle	skin
E-GEOD-14098_38_1_3_mod.txt	ArrayExpress	E-GEOD-14098	-1.11579047082	Homo sapiens	Gene expression profiles obtained from laser-microdissected human choroid plexus papilloma cells	FactorValue..SEX.	female	not specified
E-GEOD-24207_47_5_22_mod.txt	ArrayExpress	E-GEOD-24207	-3.16913284048	Mus musculus	mRNA analysis in different mouse tissues	FactorValue..TISSUE.	diaphragm	testis
GDS3113_tissue_21_24_mod.txt	GEO	GDS3113	-3.90971398912	Homo sapiens	Various normal tissues	tissue	skeletal muscle	spinal cord
GDS3113_tissue_21_27_mod.txt	GEO	GDS3113	-3.43478555518	Homo sapiens	Various normal tissues	tissue	skeletal muscle	thymus
E-TABM-1091_29_1_5_mod.txt	ArrayExpress	E-TABM-1091	1.72514466155	Homo sapiens	Transcriptiion profiling by array of human ratiometric mixes of high quality RNA from different tissues using different labeling protocols to provide a mechanism for assessing process improvement	Factor.Value..MIX.	Human Brain Reference RNA	skeletal muscle only
GDS2688_time_4_7_mod.txt	GEO	GDS2688	2.29137888416	Rattus norvegicus	Skeletal muscle response to chronic corticosteroid exposure: time course	time	168 h	36 h
E-GEOD-24207_47_5_23_mod.txt	ArrayExpress	E-GEOD-24207	-3.08476223299	Mus musculus	mRNA analysis in different mouse tissues	FactorValue..TISSUE.	diaphragm	thymus
E-GEOD-24207_47_8_12_mod.txt	ArrayExpress	E-GEOD-24207	2.88034190404	Mus musculus	mRNA analysis in different mouse tissues	FactorValue..TISSUE.	insulinoma	muscle
GDS1490_tissue_15_27_mod.txt	GEO	GDS1490	2.88244146975	Mus musculus	Neural tissue profiling	tissue	inferior colliculus	skeletal muscle
E-GEOD-28457_33_1_2_mod.txt	ArrayExpress	E-GEOD-28457	-2.66854599375	Mus musculus	Gene expression profile of E1A infected C2C12 myotubes	FactorValue..TREATMENT.	dl312 infected	dl520 infected
GDS3113_tissue_15_21_mod.txt	GEO	GDS3113	3.63346130398	Homo sapiens	Various normal tissues	tissue	pancreas	skeletal muscle
E-GEOD-28598_46_2_3_mod.txt	ArrayExpress	E-GEOD-28598	2.2982140112	Mus musculus	Protection from obesity and diabetes by blockade of TGF-beta/Smad3 signaling	FactorValue..STRAIN.	C57J/B6	mixed strains of C57BL/6 and NIH Black Swiss females (Taconic)
GDS1247_tissue_1_2_mod.txt	GEO	GDS1247	1.15780490523	Mus musculus	Dysferlin deficiency effect on skeletal and cardiac muscles	tissue	cardiac muscle	skeletal muscle
E-GEOD-18649_36_3_4_mod.txt	ArrayExpress	E-GEOD-18649	5.23769204929	Mus musculus	Molecular Profiling of the Developing Axial Skeleton: A role for Tgfbr2 in the Development of the Intervertebral Disc.	FactorValue..GENOTYPE.	Cre+;Tgrbr2lox.lox	not specified
E-GEOD-34907_29_3_4_mod.txt	ArrayExpress	E-GEOD-34907	-1.61155168073	Mus musculus	Genetic and epigenetic determinants of neurogenesis and myogenesis [expression profiling]	FactorValue..CELL.TYPE.	undifferentiated MEF cells	undifferentiated P19 cells
E-GEOD-24207_47_5_8_mod.txt	ArrayExpress	E-GEOD-24207	-3.40021708505	Mus musculus	mRNA analysis in different mouse tissues	FactorValue..TISSUE.	diaphragm	insulinoma
E-GEOD-30138_43_3_5_mod.txt	ArrayExpress	E-GEOD-30138	-3.52023214962	Mus musculus	Global Gene Expression Analysis of Murine Limb Development	FactorValue..DEVELOPMENTAL.STAGE.	E12.5	E9.5
E-GEOD-19626_22_2_5_mod.txt	ArrayExpress	E-GEOD-19626	-2.52081309615	Mus musculus	Profiling gene expression in Vax2 knockout compared with wild type mice	Factor.Value..AGE.	E12.5	P8
E-MEXP-3026_34_4_5_mod.txt	ArrayExpress	E-MEXP-3026	1.08413687723	Mus musculus	Liver-derived IGF-I regulates mean life span in mice	Factor.Value.ORGANISM_PART.	liver	muscle
E-GEOD-22139_36_1_2_mod.txt	ArrayExpress	E-GEOD-22139	1.62869108743	Homo sapiens	Bone morphogenetic protein-7 is a MYC target with pro-survival functions in childhood medulloblastoma	FactorValue..CELL.LINE.	DAOY	DAOY M14
E-GEOD-30138_43_1_2_mod.txt	ArrayExpress	E-GEOD-30138	2.40887103933	Mus musculus	Global Gene Expression Analysis of Murine Limb Development	FactorValue..DEVELOPMENTAL.STAGE.	E10.5	E11.5
E-GEOD-24628_22_1_3_mod.txt	ArrayExpress	E-GEOD-24628	3.92001332679	Mus musculus	Subtypes of medulloblastoma have distinct developmental origins	Factor.Value..CELL.TYPE.	embryonic dorsal brainstem	medulloblastoma generated by inactivating Ptch1
GDS3142_tissue_4_8_mod.txt	GEO	GDS3142	1.91610914704	Mus musculus	Various tissues	tissue	brain	fetus
E-GEOD-24207_47_12_22_mod.txt	ArrayExpress	E-GEOD-24207	-2.64925765947	Mus musculus	mRNA analysis in different mouse tissues	FactorValue..TISSUE.	muscle	testis
E-TABM-1091_27_1_2_mod.txt	ArrayExpress	E-TABM-1091	-1.30011703004	Homo sapiens	Transcriptiion profiling by array of human ratiometric mixes of high quality RNA from different tissues using different labeling protocols to provide a mechanism for assessing process improvement	Factor.Value..LABELING_TIME.	16 hr	1 hr
E-GEOD-18649_36_1_4_mod.txt	ArrayExpress	E-GEOD-18649	5.43491676114	Mus musculus	Molecular Profiling of the Developing Axial Skeleton: A role for Tgfbr2 in the Development of the Intervertebral Disc.	FactorValue..GENOTYPE.	Cre-;Tgfbr2lox/wt	not specified
GDS3113_tissue_21_23_mod.txt	GEO	GDS3113	-4.13358839844	Homo sapiens	Various normal tissues	tissue	skeletal muscle	small intestine
GDS2158_time_1_2_mod.txt	GEO	GDS2158	1.9689665273	Mus musculus	Emery-Dreifuss muscular dystrophy model: regenerating skeletal muscle	time	0 d	3 d
E-GEOD-19401_37_2_4_mod.txt	ArrayExpress	E-GEOD-19401	-1.1374679473	Mus musculus	Transcription profiling by array of Mus musculus follicular dendritic cells	FactorValue.CELL.TYPE.	follicular dendritic cell	in vitro pLN follicular dendritic cell
E-TABM-1099_31_1_3_mod.txt	ArrayExpress	E-TABM-1099	1.68226884061	Mus musculus	Transcriptomic Analysis of Embryonic Mammary Cells	Factor.Value..PHENOTYPE.	epithelium	mesenchyme
E-GEOD-33199_29_1_10_mod.txt	ArrayExpress	E-GEOD-33199	4.28249255674	Mus musculus	A mouse model of the most aggressive subgroup of human medulloblastoma [Mouse430 2]	FactorValue..VARIATION.	cmyc MB	Ptc+/-, Cdkn2c-/-
E-GEOD-11990_35_2_5_mod.txt	ArrayExpress	E-GEOD-11990	-1.13879515784	Mus musculus	Gene expression profiling of mouse p53-deficient epidermal carcinoma defines molecular determinants of human cancer malignancy (training dataset)	FactorValue..HISTOLOGICAL.SUBTYPE.	not specified	undifferentiated
E-MEXP-3026_34_2_5_mod.txt	ArrayExpress	E-MEXP-3026	1.27214633083	Mus musculus	Liver-derived IGF-I regulates mean life span in mice	Factor.Value.ORGANISM_PART.	fat	muscle
E-GEOD-24637_42_2_3_mod.txt	ArrayExpress	E-GEOD-24637	2.10224380324	Mus musculus	Genetic and genomic analysis of hyperlipidemia	FactorValue..TISSUE.	liver	muscle
E-GEOD-19626_22_2_4_mod.txt	ArrayExpress	E-GEOD-19626	-3.20102801524	Mus musculus	Profiling gene expression in Vax2 knockout compared with wild type mice	Factor.Value..AGE.	E12.5	P60
E-GEOD-27628_35_3_5_mod.txt	ArrayExpress	E-GEOD-27628	1.38311413054	Mus musculus	Expression data from affected skin from psoriasis mouse models and normal skin from control mice	FactorValue..STRAIN.	FVB/NCrIBR	ICR/B6D2
GDS586_time_1_4_mod.txt	GEO	GDS586	-1.14847386085	Mus musculus	Myogenic differentiation timecourse (MG-U74A)	time	0 d	-2 d
GDS3142_tissue_7_8_mod.txt	GEO	GDS3142	1.70879577805	Mus musculus	Various tissues	tissue	eye	fetus
E-GEOD-32334_31_2_5_mod.txt	ArrayExpress	E-GEOD-32334	-2.7089397665	Mus musculus	Developmental timecourse of mouse ocular lens and whole embryo control	FactorValue..STAGE.	E10.5-12.5	E12.5
GDS1511_development.stage_1_2_mod.txt	GEO	GDS1511	-2.11047584965	Mus musculus	Transcription factor RUNX1 knockout	development.stage	E12	E8.5
GDS1490_tissue_22_26_mod.txt	GEO	GDS1490	1.09644941342	Mus musculus	Neural tissue profiling	tissue	periaqueductal gray	retina
E-GEOD-24207_47_12_20_mod.txt	ArrayExpress	E-GEOD-24207	-2.65360766567	Mus musculus	mRNA analysis in different mouse tissues	FactorValue..TISSUE.	muscle	small intestine
E-GEOD-24207_47_5_13_mod.txt	ArrayExpress	E-GEOD-24207	-3.99124550415	Mus musculus	mRNA analysis in different mouse tissues	FactorValue..TISSUE.	diaphragm	ovary
E-GEOD-33199_29_8_9_mod.txt	ArrayExpress	E-GEOD-33199	1.11767949005	Mus musculus	A mouse model of the most aggressive subgroup of human medulloblastoma [Mouse430 2]	FactorValue..VARIATION.	p53-/-, Cdkn2c-/-, Math1-GFP infected with mcMyc/mRFP	p53floxed, Nestin-Cre, Cdkn2c-/-
GDS3142_tissue_3_8_mod.txt	GEO	GDS3142	1.71328147963	Mus musculus	Various tissues	tissue	bone marrow	fetus
GDS3113_tissue_13_27_mod.txt	GEO	GDS3113	1.56688462964	Homo sapiens	Various normal tissues	tissue	mammary gland	thymus
GDS3113_tissue_3_21_mod.txt	GEO	GDS3113	4.36820194042	Homo sapiens	Various normal tissues	tissue	brain	skeletal muscle
GDS1490_tissue_16_27_mod.txt	GEO	GDS1490	3.04372084576	Mus musculus	Neural tissue profiling	tissue	kidney	skeletal muscle
GDS3113_tissue_16_21_mod.txt	GEO	GDS3113	4.60397749509	Homo sapiens	Various normal tissues	tissue	peripheral blood lymphocyte	skeletal muscle
GDS276_tissue_1_3_mod.txt	GEO	GDS276	5.09524669463	Rattus norvegicus	Muscle profiles	tissue	cardiac ventricle muscle	leg gastrocnemius/soleus muscle
E-GEOD-32334_31_2_6_mod.txt	ArrayExpress	E-GEOD-32334	-1.79838792136	Mus musculus	Developmental timecourse of mouse ocular lens and whole embryo control	FactorValue..STAGE.	E10.5-12.5	E13.5
GDS3113_tissue_14_21_mod.txt	GEO	GDS3113	4.25905037586	Homo sapiens	Various normal tissues	tissue	ovary	skeletal muscle
GDS3142_tissue_5_17_mod.txt	GEO	GDS3142	-1.69786520052	Mus musculus	Various tissues	tissue	diaphragm	salivary gland
E-GEOD-25169_45_2_3_mod.txt	ArrayExpress	E-GEOD-25169	2.45671274826	Mus musculus	Chromatin remodeling enzyme Brg1 is required for mouse lens fiber cell terminal differentiation and their denucleation	FactorValue..VARIATION.	not specified	wild type
E-GEOD-24207_47_9_12_mod.txt	ArrayExpress	E-GEOD-24207	2.87558170831	Mus musculus	mRNA analysis in different mouse tissues	FactorValue..TISSUE.	kidney	muscle
GDS1490_tissue_5_27_mod.txt	GEO	GDS1490	2.46290128532	Mus musculus	Neural tissue profiling	tissue	cerebellum	skeletal muscle
E-GEOD-24207_47_5_11_mod.txt	ArrayExpress	E-GEOD-24207	-3.60959924804	Mus musculus	mRNA analysis in different mouse tissues	FactorValue..TISSUE.	diaphragm	lung
E-GEOD-33199_29_8_10_mod.txt	ArrayExpress	E-GEOD-33199	4.10583762943	Mus musculus	A mouse model of the most aggressive subgroup of human medulloblastoma [Mouse430 2]	FactorValue..VARIATION.	p53-/-, Cdkn2c-/-, Math1-GFP infected with mcMyc/mRFP	Ptc+/-, Cdkn2c-/-
GDS1759_tissue_1_2_mod.txt	GEO	GDS1759	-1.66033943879	Rattus norvegicus	Retinas under a light-dark cycle and in constant dim light: time course	tissue	pineal gland	retina
GDS254_tissue_1_2_mod.txt	GEO	GDS254	1.27111433597	Rattus norvegicus	Muscle, normal extraocular, profile	tissue	extraocular skeletal muscle	tibialis anterior skeletal muscle
E-GEOD-30201_38_7_8_mod.txt	ArrayExpress	E-GEOD-30201	-1.21175586582	Homo sapiens	Expression data of ribosomal proteins from sorted hematopoietic stems cells from patients with low risk MDS.	FactorValue..AGE.	77	age matched
GDS2001_tissue_1_2_mod.txt	GEO	GDS2001	-1.54681099841	Mus musculus	Utrophin/dystrophin-deficient double mutant and dystrophin-deficient mdx mutant skeletal muscles	tissue	extraocular	heart
GDS2312_tissue_1_5_mod.txt	GEO	GDS2312	1.13260131861	Mus musculus	Nemaline myopathy model: various skeletal muscles	tissue	diaphragm	tibialis anterior
GDS1840_time_3_4_mod.txt	GEO	GDS1840	1.74728726368	Rattus norvegicus	Denervation effect on somatosensory cortex: time course	time	3 days	7 days
GDS3142_tissue_8_14_mod.txt	GEO	GDS3142	-1.89888604377	Mus musculus	Various tissues	tissue	fetus	ovary
GDS3113_tissue_1_4_mod.txt	GEO	GDS3113	-2.34003600365	Homo sapiens	Various normal tissues	tissue	adrenal gland	colon
GDS3113_tissue_11_21_mod.txt	GEO	GDS3113	4.27445155581	Homo sapiens	Various normal tissues	tissue	liver	skeletal muscle
GDS1490_tissue_4_8_mod.txt	GEO	GDS1490	-1.2077428727	Mus musculus	Neural tissue profiling	tissue	brown adipose tissue	dentate gyrus
E-GEOD-27987_35_1_7_mod.txt	ArrayExpress	E-GEOD-27987	1.08451355838	Mus musculus	Differential pre-mRNA processing in Crebbp+/- mice	FactorValue..CELL.TYPE.	Cdkn1a-/- FLHSC	Ep300+/- FLHSC
E-GEOD-32334_31_2_3_mod.txt	ArrayExpress	E-GEOD-32334	-2.5696674646	Mus musculus	Developmental timecourse of mouse ocular lens and whole embryo control	FactorValue..STAGE.	E10.5-12.5	E11.5
GDS3142_tissue_8_12_mod.txt	GEO	GDS3142	-1.925346756	Mus musculus	Various tissues	tissue	fetus	lung
E-GEOD-25098_33_2_3_mod.txt	ArrayExpress	E-GEOD-25098	-1.90944269042	Mus musculus	Rhabdomyosarcoma can be initiated in activated Pax7+ Muscle Progenitor Cells	FactorValue..TISSUE.	Lineage Depleted Tumor	Normal Muscle
GDS3113_tissue_1_13_mod.txt	GEO	GDS3113	-1.92464114895	Homo sapiens	Various normal tissues	tissue	adrenal gland	mammary gland
GDS3224_tissue_1_2_mod.txt	GEO	GDS3224	-6.62961720326	Rattus norvegicus	Heart left ventricle and diaphragm comparison	tissue	diaphragm	heart
GDS2091_cell.type_1_3_mod.txt	GEO	GDS2091	-3.3741023524	Mus musculus	DNA demethylation effect on terminally differentiated cells	cell.type	chondrocyte	osteoblast
E-GEOD-24207_47_5_19_mod.txt	ArrayExpress	E-GEOD-24207	-3.43543318117	Mus musculus	mRNA analysis in different mouse tissues	FactorValue..TISSUE.	diaphragm	seminal vesicle
GDS1607_tissue_1_2_mod.txt	GEO	GDS1607	-4.21977878463	Mus musculus	Muscle glycogen content effect on skeletal muscle	tissue	anterior tibialis	liver
E-GEOD-30138_43_1_3_mod.txt	ArrayExpress	E-GEOD-30138	3.04285963804	Mus musculus	Global Gene Expression Analysis of Murine Limb Development	FactorValue..DEVELOPMENTAL.STAGE.	E10.5	E12.5
GDS2385_tissue_1_3_mod.txt	GEO	GDS2385	-1.75252748384	Rattus norvegicus	Targretin, 9-cis retinoic acid, and 4-hydroxyphenylretinamide effect on various organs	tissue	liver	mammary gland
GDS3113_tissue_8_21_mod.txt	GEO	GDS3113	4.62339340849	Homo sapiens	Various normal tissues	tissue	fetal thymus	skeletal muscle
GDS589_tissue_4_6_mod.txt	GEO	GDS589	1.74809081958	Rattus norvegicus	Multiple normal tissue gene expression across strains	tissue	cerebellum	cornea
GDS589_tissue_4_24_mod.txt	GEO	GDS589	1.92781221276	Rattus norvegicus	Multiple normal tissue gene expression across strains	tissue	cerebellum	primary cortex neurons
GDS3113_tissue_21_32_mod.txt	GEO	GDS3113	-4.17309331145	Homo sapiens	Various normal tissues	tissue	skeletal muscle	uterus
E-GEOD-33199_29_6_10_mod.txt	ArrayExpress	E-GEOD-33199	3.75908241552	Mus musculus	A mouse model of the most aggressive subgroup of human medulloblastoma [Mouse430 2]	FactorValue..VARIATION.	p53-/-, Cdkn2c-/-, Math1-GFP infected with mMycn/mRFP	Ptc+/-, Cdkn2c-/-
E-GEOD-24207_47_5_21_mod.txt	ArrayExpress	E-GEOD-24207	-3.50485859176	Mus musculus	mRNA analysis in different mouse tissues	FactorValue..TISSUE.	diaphragm	spleen
E-GEOD-24207_47_1_5_mod.txt	ArrayExpress	E-GEOD-24207	3.41512911407	Mus musculus	mRNA analysis in different mouse tissues	FactorValue..TISSUE.	adipose tissue	diaphragm
GDS3142_tissue_10_13_mod.txt	GEO	GDS3142	1.72220033403	Mus musculus	Various tissues	tissue	kidney	muscle
E-GEOD-19626_22_1_3_mod.txt	ArrayExpress	E-GEOD-19626	3.26406916333	Mus musculus	Profiling gene expression in Vax2 knockout compared with wild type mice	Factor.Value..AGE.	E10.5	E16.5
GDS1865_time_1_3_mod.txt	GEO	GDS1865	4.27984864547	Mus musculus	Chondrocyte differentiation: time course	time	12 d	3 d
E-GEOD-25098_32_6_7_mod.txt	ArrayExpress	E-GEOD-25098	-2.0105450191	Mus musculus	Rhabdomyosarcoma can be initiated in activated Pax7+ Muscle Progenitor Cells	FactorValue..GENOTYPE.VARIATION.	Rosa26-CreER; LSL-KrasG12D;Trp53Flox/Flox	Wild Type mice
GDS2688_time_1_4_mod.txt	GEO	GDS2688	-3.71049355628	Rattus norvegicus	Skeletal muscle response to chronic corticosteroid exposure: time course	time	0 h	168 h
GDS1956_disease.state_2_5_mod.txt	GEO	GDS1956	-1.09307194456	Homo sapiens	Various muscle diseases (HG-U133A)	disease.state	amyotophic lateral sclerosis	Duchenne muscular dystrophy
E-GEOD-28598_47_1_2_mod.txt	ArrayExpress	E-GEOD-28598	2.07749906566	Mus musculus	Protection from obesity and diabetes by blockade of TGF-beta/Smad3 signaling	FactorValue..TREATMENT.	diet induced obese	high fat diet
GDS63_time_4_5_mod.txt	GEO	GDS63	1.79366914983	Rattus norvegicus	Spinal cord injury and regeneration time course: at T9 (RG-U34A)	time	14 d	1 d
GDS3142_tissue_13_21_mod.txt	GEO	GDS3142	-1.45819101283	Mus musculus	Various tissues	tissue	muscle	testis
E-TABM-1091_30_1_2_mod.txt	ArrayExpress	E-TABM-1091	1.00096423208	Homo sapiens	Transcriptiion profiling by array of human ratiometric mixes of high quality RNA from different tissues using different labeling protocols to provide a mechanism for assessing process improvement	Factor.Value..INPUT_RNA.	0.02 micrograms	0.1-0.2 micrograms
E-GEOD-33199_29_5_10_mod.txt	ArrayExpress	E-GEOD-33199	3.6211223283	Mus musculus	A mouse model of the most aggressive subgroup of human medulloblastoma [Mouse430 2]	FactorValue..VARIATION.	p53-/-, Cdkn2c-/- infected with mMycn/GFP	Ptc+/-, Cdkn2c-/-
E-GEOD-28598_46_1_2_mod.txt	ArrayExpress	E-GEOD-28598	-2.0906011774	Mus musculus	Protection from obesity and diabetes by blockade of TGF-beta/Smad3 signaling	FactorValue..STRAIN.	C57BL/6	C57J/B6
GDS1490_tissue_27_28_mod.txt	GEO	GDS1490	-2.48880694003	Mus musculus	Neural tissue profiling	tissue	skeletal muscle	spinal cord
GDS256_time_11_15_mod.txt	GEO	GDS256	2.3834233962	Rattus norvegicus	Pharmacogenomic effect of corticosteroid in skeletal muscle	time	4 hour	72 hour
E-TABM-1091_31_2_3_mod.txt	ArrayExpress	E-TABM-1091	-1.08470810105	Homo sapiens	Transcriptiion profiling by array of human ratiometric mixes of high quality RNA from different tissues using different labeling protocols to provide a mechanism for assessing process improvement	Factor.Value..PROTOCOL.	Labeling: IVTexpress	Labeling: Ovation
GDS3142_tissue_4_5_mod.txt	GEO	GDS3142	2.06351227738	Mus musculus	Various tissues	tissue	brain	diaphragm
E-GEOD-24207_47_12_18_mod.txt	ArrayExpress	E-GEOD-24207	-2.26754471105	Mus musculus	mRNA analysis in different mouse tissues	FactorValue..TISSUE.	muscle	salivary gland
GDS1490_tissue_26_27_mod.txt	GEO	GDS1490	2.05846917566	Mus musculus	Neural tissue profiling	tissue	retina	skeletal muscle
GDS3142_tissue_13_16_mod.txt	GEO	GDS3142	-1.65135868897	Mus musculus	Various tissues	tissue	muscle	placenta
GDS3113_tissue_21_28_mod.txt	GEO	GDS3113	-5.15796430376	Homo sapiens	Various normal tissues	tissue	skeletal muscle	thyroid
E-GEOD-17110_41_1_4_mod.txt	ArrayExpress	E-GEOD-17110	-1.17524276616	Mus musculus	Gene expression data from P. gingivalis infected Mouse	FactorValue..TISSUE.	calvarial bone	soft tissues overlying calvarial bones
GDS1956_disease.state_2_3_mod.txt	GEO	GDS1956	-2.01238314961	Homo sapiens	Various muscle diseases (HG-U133A)	disease.state	amyotophic lateral sclerosis	Becker muscular dystrophy
GDS3113_tissue_21_30_mod.txt	GEO	GDS3113	-4.10612412631	Homo sapiens	Various normal tissues	tissue	skeletal muscle	trachea
GDS1956_disease.state_3_11_mod.txt	GEO	GDS1956	1.28531498972	Homo sapiens	Various muscle diseases (HG-U133A)	disease.state	Becker muscular dystrophy	normal
E-GEOD-18649_35_3_4_mod.txt	ArrayExpress	E-GEOD-18649	5.04264573809	Mus musculus	Molecular Profiling of the Developing Axial Skeleton: A role for Tgfbr2 in the Development of the Intervertebral Disc.	FactorValue..AGENT.	not specified	TGFb
E-GEOD-15155_32_1_2_mod.txt	ArrayExpress	E-GEOD-15155	1.24767394172	Mus musculus	Gene profiling of quiescent and activated skeletal muscle satellite cells by an in vivo approach	FactorValue..AGE.	adult (6weeks)	cultured (3days)
GDS1630_cell.line_1_2_mod.txt	GEO	GDS1630	1.95403990448	Homo sapiens	Immortalized endothelial cell line response to atorvastatin	cell.line	immortalized	primary
GDS1279_tissue_1_2_mod.txt	GEO	GDS1279	-1.05443965462	Rattus norvegicus	Age effect on extraocular muscles	tissue	extensor digitorum longus	extraocular muscle
E-GEOD-24207_47_2_5_mod.txt	ArrayExpress	E-GEOD-24207	3.4164580819	Mus musculus	mRNA analysis in different mouse tissues	FactorValue..TISSUE.	adrenal gland	diaphragm
GDS3142_tissue_13_17_mod.txt	GEO	GDS3142	-1.4044546794	Mus musculus	Various tissues	tissue	muscle	salivary gland
E-GEOD-33199_29_4_10_mod.txt	ArrayExpress	E-GEOD-33199	4.31618020387	Mus musculus	A mouse model of the most aggressive subgroup of human medulloblastoma [Mouse430 2]	FactorValue..VARIATION.	p53-/-, Cdkn2c-/- infected with hcMyc/GFP	Ptc+/-, Cdkn2c-/-
E-GEOD-19684_37_1_4_mod.txt	ArrayExpress	E-GEOD-19684	-2.66578735564	Mus musculus	Transcription profiling by array of mouse granule neuron progenitors overexpressing Gli1	Factor.Value..GENOTYPE.	Atoh1 overexpression	Math1-ER overexpression
E-GEOD-24243_38_1_2_mod.txt	ArrayExpress	E-GEOD-24243	2.20753172094	Mus musculus	Murine skin gene expression analysis of skin-specific Scd1-deficient and control mice	FactorValue..GENOTYPE.VARIATION.	Scd1 knockout (SKO)	Scd1flox/flox (Lox) control
E-GEOD-24207_47_12_19_mod.txt	ArrayExpress	E-GEOD-24207	-2.91555800016	Mus musculus	mRNA analysis in different mouse tissues	FactorValue..TISSUE.	muscle	seminal vesicle
E-GEOD-24207_47_10_12_mod.txt	ArrayExpress	E-GEOD-24207	2.70130266876	Mus musculus	mRNA analysis in different mouse tissues	FactorValue..TISSUE.	liver	muscle
E-GEOD-24207_47_1_12_mod.txt	ArrayExpress	E-GEOD-24207	2.89525393306	Mus musculus	mRNA analysis in different mouse tissues	FactorValue..TISSUE.	adipose tissue	muscle
GDS3424_agent_1_3_mod.txt	GEO	GDS3424	1.00608153483	Homo sapiens	Conjugated linoleic acid isomers effect on intestinal cell line	agent	cis-9, trans-11 CLA	trans-10, cis-12 CLA
E-GEOD-25098_32_3_7_mod.txt	ArrayExpress	E-GEOD-25098	-1.93981481501	Mus musculus	Rhabdomyosarcoma can be initiated in activated Pax7+ Muscle Progenitor Cells	FactorValue..GENOTYPE.VARIATION.	Pax7-CreER/+; LSL-KrasG12D;Trp53Flox/Flox	Wild Type mice
E-GEOD-28598_47_1_3_mod.txt	ArrayExpress	E-GEOD-28598	2.31131612294	Mus musculus	Protection from obesity and diabetes by blockade of TGF-beta/Smad3 signaling	FactorValue..TREATMENT.	diet induced obese	regular diet
GDS1490_tissue_27_34_mod.txt	GEO	GDS1490	-3.01151220002	Mus musculus	Neural tissue profiling	tissue	skeletal muscle	white adipose tissue
E-GEOD-18649_35_1_3_mod.txt	ArrayExpress	E-GEOD-18649	-5.37617089817	Mus musculus	Molecular Profiling of the Developing Axial Skeleton: A role for Tgfbr2 in the Development of the Intervertebral Disc.	FactorValue..AGENT.	BMP	not specified
GDS3142_tissue_11_13_mod.txt	GEO	GDS3142	1.56731478569	Mus musculus	Various tissues	tissue	liver	muscle
GDS1865_time_3_5_mod.txt	GEO	GDS1865	-4.07547078937	Mus musculus	Chondrocyte differentiation: time course	time	3 d	9 d
E-GEOD-24207_47_5_6_mod.txt	ArrayExpress	E-GEOD-24207	-3.20326455901	Mus musculus	mRNA analysis in different mouse tissues	FactorValue..TISSUE.	diaphragm	eye
GDS3142_tissue_8_16_mod.txt	GEO	GDS3142	-1.79736607974	Mus musculus	Various tissues	tissue	fetus	placenta
GDS1490_tissue_10_27_mod.txt	GEO	GDS1490	2.69031504554	Mus musculus	Neural tissue profiling	tissue	heart	skeletal muscle
E-TABM-1091_30_1_4_mod.txt	ArrayExpress	E-TABM-1091	1.52961579704	Homo sapiens	Transcriptiion profiling by array of human ratiometric mixes of high quality RNA from different tissues using different labeling protocols to provide a mechanism for assessing process improvement	Factor.Value..INPUT_RNA.	0.02 micrograms	5.0 micrograms
GDS3142_tissue_5_12_mod.txt	GEO	GDS3142	-2.07274988635	Mus musculus	Various tissues	tissue	diaphragm	lung
E-GEOD-24207_47_13_18_mod.txt	ArrayExpress	E-GEOD-24207	1.2038256121	Mus musculus	mRNA analysis in different mouse tissues	FactorValue..TISSUE.	ovary	salivary gland
GDS1956_disease.state_9_10_mod.txt	GEO	GDS1956	1.1115401521	Homo sapiens	Various muscle diseases (HG-U133A)	disease.state	FKRP mutation	juvenile dermatomyositis
E-GEOD-27987_35_6_7_mod.txt	ArrayExpress	E-GEOD-27987	1.18695030371	Mus musculus	Differential pre-mRNA processing in Crebbp+/- mice	FactorValue..CELL.TYPE.	Crebbp+/+ MEF	Ep300+/- FLHSC
GDS3113_tissue_4_24_mod.txt	GEO	GDS3113	1.50735105039	Homo sapiens	Various normal tissues	tissue	colon	spinal cord
E-GEOD-32334_31_1_2_mod.txt	ArrayExpress	E-GEOD-32334	2.81996795581	Mus musculus	Developmental timecourse of mouse ocular lens and whole embryo control	FactorValue..STAGE.	E10.5	E10.5-12.5
GDS3142_tissue_3_5_mod.txt	GEO	GDS3142	1.86068460997	Mus musculus	Various tissues	tissue	bone marrow	diaphragm
GDS3113_tissue_1_21_mod.txt	GEO	GDS3113	3.07702903586	Homo sapiens	Various normal tissues	tissue	adrenal gland	skeletal muscle
GDS1490_tissue_4_29_mod.txt	GEO	GDS1490	-1.02713788424	Mus musculus	Neural tissue profiling	tissue	brown adipose tissue	spleen
GDS3142_tissue_13_22_mod.txt	GEO	GDS3142	-1.45673891733	Mus musculus	Various tissues	tissue	muscle	thymus
E-GEOD-32334_31_4_6_mod.txt	ArrayExpress	E-GEOD-32334	-1.42006763318	Mus musculus	Developmental timecourse of mouse ocular lens and whole embryo control	FactorValue..STAGE.	E11.5-13.5	E13.5
GDS3142_tissue_13_15_mod.txt	GEO	GDS3142	-1.68332532856	Mus musculus	Various tissues	tissue	muscle	pituitary gland
GDS3113_tissue_4_22_mod.txt	GEO	GDS3113	2.10540347407	Homo sapiens	Various normal tissues	tissue	colon	skin
E-GEOD-24886_40_1_2_mod.txt	ArrayExpress	E-GEOD-24886	-1.56644160687	Mus musculus	Exosomes mediate protective messages during oxidative stress; role of exosomal shuttle RNA	FactorValue..CELL.TYPE.	Exosomes	MC/9
GDS3142_tissue_5_18_mod.txt	GEO	GDS3142	-1.81880267595	Mus musculus	Various tissues	tissue	diaphragm	seminal vesicle
GDS278_time_1_3_mod.txt	GEO	GDS278	1.00937486371	Rattus norvegicus	Muscle response to acute resistance exercise	time	0 hour	6 hour
GDS3142_tissue_5_15_mod.txt	GEO	GDS3142	-1.97673584968	Mus musculus	Various tissues	tissue	diaphragm	pituitary gland
GDS2698_disease.state_1_2_mod.txt	GEO	GDS2698	-3.26426500538	Mus musculus	Synovial sarcoma model	disease.state	control	tumor
E-GEOD-24628_22_3_4_mod.txt	ArrayExpress	E-GEOD-24628	-3.1779058035	Mus musculus	Subtypes of medulloblastoma have distinct developmental origins	Factor.Value..CELL.TYPE.	medulloblastoma generated by inactivating Ptch1	postnatal cerebellar granule neuron precursor cells
GDS3142_tissue_8_9_mod.txt	GEO	GDS3142	-1.40754279459	Mus musculus	Various tissues	tissue	fetus	heart
GDS3142_tissue_5_10_mod.txt	GEO	GDS3142	-2.01561085514	Mus musculus	Various tissues	tissue	diaphragm	kidney
GDS1865_time_2_3_mod.txt	GEO	GDS1865	4.06744333417	Mus musculus	Chondrocyte differentiation: time course	time	15 d	3 d
GDS3142_tissue_8_15_mod.txt	GEO	GDS3142	-1.82933271933	Mus musculus	Various tissues	tissue	fetus	pituitary gland
E-GEOD-32334_30_2_3_mod.txt	ArrayExpress	E-GEOD-32334	1.636250655	Mus musculus	Developmental timecourse of mouse ocular lens and whole embryo control	FactorValue..ORGANISM.PART.	Tooth germ	Whole embryo
GDS3142_tissue_4_13_mod.txt	GEO	GDS3142	1.77010175627	Mus musculus	Various tissues	tissue	brain	muscle
GDS1663_other_1_2_mod.txt	GEO	GDS1663	-1.24339549358	Homo sapiens	Expression data from different research centers	other	Children's National Medical Center in Washington, DC	Translational Genomics Research Institute
GDS2854_protocol_1_2_mod.txt	GEO	GDS2854	1.53237901005	Mus musculus	Myogenic transcription factor MyoD mutant expression effect on embryonic fibroblast: time course	protocol	control	mutant MyoD expression
GDS1490_tissue_7_27_mod.txt	GEO	GDS1490	2.72743079871	Mus musculus	Neural tissue profiling	tissue	choroid plexus fourth ventricle	skeletal muscle
E-GEOD-25169_43_1_2_mod.txt	ArrayExpress	E-GEOD-25169	2.81389120002	Mus musculus	Chromatin remodeling enzyme Brg1 is required for mouse lens fiber cell terminal differentiation and their denucleation	FactorValue..GENOTYPE.	??A-crystallin promoter driven dominant-negative Brg1	not specified
E-TABM-1091_29_4_5_mod.txt	ArrayExpress	E-TABM-1091	1.67945035387	Homo sapiens	Transcriptiion profiling by array of human ratiometric mixes of high quality RNA from different tissues using different labeling protocols to provide a mechanism for assessing process improvement	Factor.Value..MIX.	Mix2	skeletal muscle only
GDS3113_tissue_18_21_mod.txt	GEO	GDS3113	4.04533751595	Homo sapiens	Various normal tissues	tissue	prostate	skeletal muscle
GDS2701_time_3_4_mod.txt	GEO	GDS2701	-2.05803991768	Mus musculus	Contraction- and freeze-injured skeletal muscles: time course	time	6 h	7 d
GDS1865_time_2_4_mod.txt	GEO	GDS1865	2.10518212973	Mus musculus	Chondrocyte differentiation: time course	time	15 d	6 d
E-TABM-1091_29_3_5_mod.txt	ArrayExpress	E-TABM-1091	2.07312865436	Homo sapiens	Transcriptiion profiling by array of human ratiometric mixes of high quality RNA from different tissues using different labeling protocols to provide a mechanism for assessing process improvement	Factor.Value..MIX.	Mix1	skeletal muscle only
GDS3113_tissue_12_21_mod.txt	GEO	GDS3113	3.89216921115	Homo sapiens	Various normal tissues	tissue	lung	skeletal muscle
GDS589_tissue_5_20_mod.txt	GEO	GDS589	2.47734773895	Rattus norvegicus	Multiple normal tissue gene expression across strains	tissue	cerebral cortex	nucleus accumbens whole
GDS589_tissue_5_24_mod.txt	GEO	GDS589	1.94419014963	Rattus norvegicus	Multiple normal tissue gene expression across strains	tissue	cerebral cortex	primary cortex neurons
GDS3142_tissue_2_8_mod.txt	GEO	GDS3142	1.99317064203	Mus musculus	Various tissues	tissue	adrenal gland	fetus
E-GEOD-24207_47_3_5_mod.txt	ArrayExpress	E-GEOD-24207	3.10287858146	Mus musculus	mRNA analysis in different mouse tissues	FactorValue..TISSUE.	bone marrow	diaphragm
GDS3142_tissue_7_13_mod.txt	GEO	GDS3142	1.56278838728	Mus musculus	Various tissues	tissue	eye	muscle
E-GEOD-16728_33_2_3_mod.txt	ArrayExpress	E-GEOD-16728	1.36146300634	Homo sapiens	Transcription profiling of whole blood from sickle-cell disease patients using globin mRNA reduction	Factor.Value.Sample.Preparation.	RNA extracted from PBMC	total RNA
E-GEOD-24207_47_5_15_mod.txt	ArrayExpress	E-GEOD-24207	-3.47459067562	Mus musculus	mRNA analysis in different mouse tissues	FactorValue..TISSUE.	diaphragm	pancreatic islets
GDS3142_tissue_5_21_mod.txt	GEO	GDS3142	-1.75160153395	Mus musculus	Various tissues	tissue	diaphragm	testis
E-GEOD-24207_47_7_12_mod.txt	ArrayExpress	E-GEOD-24207	2.29078621217	Mus musculus	mRNA analysis in different mouse tissues	FactorValue..TISSUE.	heart	muscle
GDS3142_tissue_1_8_mod.txt	GEO	GDS3142	1.91765527716	Mus musculus	Various tissues	tissue	adipose tissue	fetus
E-GEOD-16992_33_1_11_mod.txt	ArrayExpress	E-GEOD-16992	1.06910119552	Mus musculus	Expression Profiling of Early Myogenesis - Affymetrix Dataset	FactorValue..TIME.	-24hr_ctrl	3hr_CHX
GDS1490_tissue_18_27_mod.txt	GEO	GDS1490	2.45296627883	Mus musculus	Neural tissue profiling	tissue	medulla oblongata	skeletal muscle
E-GEOD-25169_43_2_3_mod.txt	ArrayExpress	E-GEOD-25169	-2.73455122497	Mus musculus	Chromatin remodeling enzyme Brg1 is required for mouse lens fiber cell terminal differentiation and their denucleation	FactorValue..GENOTYPE.	not specified	wild type
E-GEOD-18649_36_2_4_mod.txt	ArrayExpress	E-GEOD-18649	5.2250008563	Mus musculus	Molecular Profiling of the Developing Axial Skeleton: A role for Tgfbr2 in the Development of the Intervertebral Disc.	FactorValue..GENOTYPE.	Cre+;Tgfbr2lox/lox	not specified
E-GEOD-25169_44_1_2_mod.txt	ArrayExpress	E-GEOD-25169	-2.7742212125	Mus musculus	Chromatin remodeling enzyme Brg1 is required for mouse lens fiber cell terminal differentiation and their denucleation	FactorValue..TISSUE.	eyeballs	lens
GDS3142_tissue_8_10_mod.txt	GEO	GDS3142	-1.8682077248	Mus musculus	Various tissues	tissue	fetus	kidney
GDS1490_tissue_27_31_mod.txt	GEO	GDS1490	-3.04995416582	Mus musculus	Neural tissue profiling	tissue	skeletal muscle	superior colliculus
E-GEOD-19626_22_3_5_mod.txt	ArrayExpress	E-GEOD-19626	-2.64063149538	Mus musculus	Profiling gene expression in Vax2 knockout compared with wild type mice	Factor.Value..AGE.	E16.5	P8
E-GEOD-24207_47_4_5_mod.txt	ArrayExpress	E-GEOD-24207	3.61753453713	Mus musculus	mRNA analysis in different mouse tissues	FactorValue..TISSUE.	brain	diaphragm
GDS2854_protocol_1_3_mod.txt	GEO	GDS2854	2.12977106122	Mus musculus	Myogenic transcription factor MyoD mutant expression effect on embryonic fibroblast: time course	protocol	control	wild type MyoD expression
E-TABM-1091_28_1_2_mod.txt	ArrayExpress	E-TABM-1091	1.23807255346	Homo sapiens	Transcriptiion profiling by array of human ratiometric mixes of high quality RNA from different tissues using different labeling protocols to provide a mechanism for assessing process improvement	Factor.Value..TARGET_HYBRIDIZED.	1.0 micrograms	6.5 micrograms
GDS246_tissue_3_4_mod.txt	GEO	GDS246	2.04294244864	Mus musculus	Hypoxia	tissue	lung	muscle
E-GEOD-28598_45_1_2_mod.txt	ArrayExpress	E-GEOD-28598	2.2982140112	Mus musculus	Protection from obesity and diabetes by blockade of TGF-beta/Smad3 signaling	FactorValue..GENOTYPE.	not specified	Smad3-/-
E-GEOD-19684_37_1_3_mod.txt	ArrayExpress	E-GEOD-19684	-2.40480590279	Mus musculus	Transcription profiling by array of mouse granule neuron progenitors overexpressing Gli1	Factor.Value..GENOTYPE.	Atoh1 overexpression	Ink4c-/-;p53-/-
E-GEOD-24637_42_3_4_mod.txt	ArrayExpress	E-GEOD-24637	-1.85883457823	Mus musculus	Genetic and genomic analysis of hyperlipidemia	FactorValue..TISSUE.	muscle	pancreas
GDS1490_tissue_17_27_mod.txt	GEO	GDS1490	3.08625232668	Mus musculus	Neural tissue profiling	tissue	liver	skeletal muscle
E-MEXP-3444_36_1_5_mod.txt	ArrayExpress	E-MEXP-3444	1.24273317296	Mus musculus	Transcriptional profiling by array of mouse cerebellar cortex during postnatal development	Factor.Value.AGE.	0	10
E-GEOD-24207_47_12_15_mod.txt	ArrayExpress	E-GEOD-24207	-2.95471549461	Mus musculus	mRNA analysis in different mouse tissues	FactorValue..TISSUE.	muscle	pancreatic islets
GDS1490_tissue_25_27_mod.txt	GEO	GDS1490	2.55861983092	Mus musculus	Neural tissue profiling	tissue	pons	skeletal muscle
E-GEOD-24207_47_7_13_mod.txt	ArrayExpress	E-GEOD-24207	-1.18058411098	Mus musculus	mRNA analysis in different mouse tissues	FactorValue..TISSUE.	heart	ovary
GDS3142_tissue_5_19_mod.txt	GEO	GDS3142	-1.6545820912	Mus musculus	Various tissues	tissue	diaphragm	small intestine
E-GEOD-19626_22_1_2_mod.txt	ArrayExpress	E-GEOD-19626	3.14425076411	Mus musculus	Profiling gene expression in Vax2 knockout compared with wild type mice	Factor.Value..AGE.	E10.5	E12.5
GDS3142_tissue_6_8_mod.txt	GEO	GDS3142	1.65044490054	Mus musculus	Various tissues	tissue	embryonic stem cells	fetus
GDS3113_tissue_7_21_mod.txt	GEO	GDS3113	4.50188027008	Homo sapiens	Various normal tissues	tissue	fetal liver	skeletal muscle
GDS3142_tissue_8_19_mod.txt	GEO	GDS3142	-1.50717896085	Mus musculus	Various tissues	tissue	fetus	small intestine
E-GEOD-17825_36_1_3_mod.txt	ArrayExpress	E-GEOD-17825	-1.03013395598	Mus musculus	Murine fracture healing	FactorValue..INJURY.	1 day post fracture	5 days post fracture
GDS3113_tissue_1_26_mod.txt	GEO	GDS3113	-1.76348747972	Homo sapiens	Various normal tissues	tissue	adrenal gland	testis
E-GEOD-24207_47_5_17_mod.txt	ArrayExpress	E-GEOD-24207	-3.59171945549	Mus musculus	mRNA analysis in different mouse tissues	FactorValue..TISSUE.	diaphragm	placenta
E-GEOD-16362_39_1_4_mod.txt	ArrayExpress	E-GEOD-16362	-1.48721123058	Mus musculus	ALS mice muscle gene expression data	FactorValue..TISSUE.	14 week-old gastrocnemius	7 week-old gastrocnemius
GDS1956_disease.state_6_10_mod.txt	GEO	GDS1956	1.23861556725	Homo sapiens	Various muscle diseases (HG-U133A)	disease.state	dysferlin mutation	juvenile dermatomyositis
GDS256_time_10_11_mod.txt	GEO	GDS256	-2.64368745888	Rattus norvegicus	Pharmacogenomic effect of corticosteroid in skeletal muscle	time	48 hour	4 hour
E-GEOD-38693_30_1_2_mod.txt	ArrayExpress	E-GEOD-38693	-2.13984836873	Mus musculus	c-JUN REPROGRAMS SCHWANN CELLS OF INJURED NERVES TO GENERATE A REPAIR CELL ESSENTIAL FOR REGENERATION	FactorValue..TREATMENT.	cut	uncut
E-GEOD-24207_47_11_12_mod.txt	ArrayExpress	E-GEOD-24207	3.08972406703	Mus musculus	mRNA analysis in different mouse tissues	FactorValue..TISSUE.	lung	muscle
GDS3142_tissue_8_18_mod.txt	GEO	GDS3142	-1.67139954561	Mus musculus	Various tissues	tissue	fetus	seminal vesicle
E-GEOD-22139_36_2_3_mod.txt	ArrayExpress	E-GEOD-22139	-1.72757589491	Homo sapiens	Bone morphogenetic protein-7 is a MYC target with pro-survival functions in childhood medulloblastoma	FactorValue..CELL.LINE.	DAOY M14	DAOY M2.1
E-GEOD-22139_36_2_4_mod.txt	ArrayExpress	E-GEOD-22139	-1.81192183442	Homo sapiens	Bone morphogenetic protein-7 is a MYC target with pro-survival functions in childhood medulloblastoma	FactorValue..CELL.LINE.	DAOY M14	DAOY V11
E-GEOD-24207_47_12_21_mod.txt	ArrayExpress	E-GEOD-24207	-2.98498341075	Mus musculus	mRNA analysis in different mouse tissues	FactorValue..TISSUE.	muscle	spleen
E-GEOD-24207_47_6_12_mod.txt	ArrayExpress	E-GEOD-24207	2.683389378	Mus musculus	mRNA analysis in different mouse tissues	FactorValue..TISSUE.	eye	muscle
GDS3113_tissue_21_31_mod.txt	GEO	GDS3113	-4.22533961967	Homo sapiens	Various normal tissues	tissue	skeletal muscle	Universal Human Reference RNA
GDS236_strain_1_2_mod.txt	GEO	GDS236	-1.01174690063	Mus musculus	Dystrophin-deficient mdx muscle regeneration	strain	mdx	wild type
GDS1490_tissue_21_27_mod.txt	GEO	GDS1490	2.79058276557	Mus musculus	Neural tissue profiling	tissue	olfactory bulbs	skeletal muscle
GDS256_time_9_13_mod.txt	GEO	GDS256	-2.03896497438	Rattus norvegicus	Pharmacogenomic effect of corticosteroid in skeletal muscle	time	45 minute	5 hour
E-GEOD-19684_37_2_4_mod.txt	ArrayExpress	E-GEOD-19684	-1.39662203642	Mus musculus	Transcription profiling by array of mouse granule neuron progenitors overexpressing Gli1	Factor.Value..GENOTYPE.	Gli1 overexpression	Math1-ER overexpression
E-GEOD-24637_42_1_3_mod.txt	ArrayExpress	E-GEOD-24637	2.28637434295	Mus musculus	Genetic and genomic analysis of hyperlipidemia	FactorValue..TISSUE.	Adipose	muscle
E-GEOD-24207_47_12_17_mod.txt	ArrayExpress	E-GEOD-24207	-3.07184427448	Mus musculus	mRNA analysis in different mouse tissues	FactorValue..TISSUE.	muscle	placenta
GDS872_time_1_5_mod.txt	GEO	GDS872	-1.16449326092	Rattus norvegicus	Spinal cord injury and regeneration time course: above T9 (RG-U34A)	time	0.5 h	28 d
GDS3142_tissue_8_21_mod.txt	GEO	GDS3142	-1.6041984036	Mus musculus	Various tissues	tissue	fetus	testis
GDS2385_tissue_1_2_mod.txt	GEO	GDS2385	-1.79145531319	Rattus norvegicus	Targretin, 9-cis retinoic acid, and 4-hydroxyphenylretinamide effect on various organs	tissue	liver	lung
GDS3113_tissue_17_21_mod.txt	GEO	GDS3113	5.18921896243	Homo sapiens	Various normal tissues	tissue	placenta	skeletal muscle
GDS3142_tissue_8_17_mod.txt	GEO	GDS3142	-1.55046207018	Mus musculus	Various tissues	tissue	fetus	salivary gland
GDS1353_time_1_2_mod.txt	GEO	GDS1353	3.70541628098	Homo sapiens	Glucocorticoid effect on lens epithelial cells: time course	time	16 h	4 h
E-TABM-1091_31_1_3_mod.txt	ArrayExpress	E-TABM-1091	-1.44255849001	Homo sapiens	Transcriptiion profiling by array of human ratiometric mixes of high quality RNA from different tissues using different labeling protocols to provide a mechanism for assessing process improvement	Factor.Value..PROTOCOL.	Labeling: IVT	Labeling: Ovation
E-GEOD-24207_47_2_12_mod.txt	ArrayExpress	E-GEOD-24207	2.89658290089	Mus musculus	mRNA analysis in different mouse tissues	FactorValue..TISSUE.	adrenal gland	muscle
GDS3113_tissue_4_18_mod.txt	GEO	GDS3113	1.37172752357	Homo sapiens	Various normal tissues	tissue	colon	prostate
E-GEOD-15155_32_2_3_mod.txt	ArrayExpress	E-GEOD-15155	-1.44820389549	Mus musculus	Gene profiling of quiescent and activated skeletal muscle satellite cells by an in vivo approach	FactorValue..AGE.	cultured (3days)	young (1week)
GDS1490_tissue_27_30_mod.txt	GEO	GDS1490	-2.75087693277	Mus musculus	Neural tissue profiling	tissue	skeletal muscle	striatum
E-GEOD-24207_47_12_16_mod.txt	ArrayExpress	E-GEOD-24207	-3.02945993951	Mus musculus	mRNA analysis in different mouse tissues	FactorValue..TISSUE.	muscle	pituitary gland
E-GEOD-18649_37_1_2_mod.txt	ArrayExpress	E-GEOD-18649	5.26147596083	Mus musculus	Molecular Profiling of the Developing Axial Skeleton: A role for Tgfbr2 in the Development of the Intervertebral Disc.	FactorValue..TISSUE.	Intervertebral disc (IVD)	not specified
GDS3142_tissue_12_13_mod.txt	GEO	GDS3142	1.77933936523	Mus musculus	Various tissues	tissue	lung	muscle
E-GEOD-23006_48_1_2_mod.txt	ArrayExpress	E-GEOD-23006	-1.53812921893	Mus musculus	Transcriptional profiling of a wound healing process in skin and oral mucosa	FactorValue..TISSUE.	mucosa (tongue)	skin
GDS256_time_1_11_mod.txt	GEO	GDS256	-2.55875857408	Rattus norvegicus	Pharmacogenomic effect of corticosteroid in skeletal muscle	time	0 minute	4 hour
GDS2158_time_1_3_mod.txt	GEO	GDS2158	1.37975785402	Mus musculus	Emery-Dreifuss muscular dystrophy model: regenerating skeletal muscle	time	0 d	4 d
GDS3113_tissue_21_26_mod.txt	GEO	GDS3113	-4.84051651559	Homo sapiens	Various normal tissues	tissue	skeletal muscle	testis
E-TABM-1091_29_2_5_mod.txt	ArrayExpress	E-TABM-1091	1.61858453344	Homo sapiens	Transcriptiion profiling by array of human ratiometric mixes of high quality RNA from different tissues using different labeling protocols to provide a mechanism for assessing process improvement	Factor.Value..MIX.	liver only	skeletal muscle only
GDS256_time_1_13_mod.txt	GEO	GDS256	-2.33862772854	Rattus norvegicus	Pharmacogenomic effect of corticosteroid in skeletal muscle	time	0 minute	5 hour
E-GEOD-24207_47_5_10_mod.txt	ArrayExpress	E-GEOD-24207	-3.22117784977	Mus musculus	mRNA analysis in different mouse tissues	FactorValue..TISSUE.	diaphragm	liver
GDS1490_tissue_4_22_mod.txt	GEO	GDS1490	-1.1082828262	Mus musculus	Neural tissue profiling	tissue	brown adipose tissue	periaqueductal gray
GDS1956_disease.state_3_10_mod.txt	GEO	GDS1956	1.64022162885	Homo sapiens	Various muscle diseases (HG-U133A)	disease.state	Becker muscular dystrophy	juvenile dermatomyositis
GDS1490_tissue_13_26_mod.txt	GEO	GDS1490	1.06313117786	Mus musculus	Neural tissue profiling	tissue	hippocampus CA3	retina
E-GEOD-24628_23_1_2_mod.txt	ArrayExpress	E-GEOD-24628	3.97360507383	Mus musculus	Subtypes of medulloblastoma have distinct developmental origins	Factor.Value..GENOTYPE.VARIATION.	BlbpCre; Ctnnb1(FlxEx3/+); Tp53 (Flx/Flx)	Ptch1(+/-)
GDS1451_agent_1_2_mod.txt	GEO	GDS1451	1.20795492564	Rattus norvegicus	Toxicants effect on liver: pooled and individual sample comparison	agent	clofibrate	diethylhexylphthalate
GDS1490_tissue_11_27_mod.txt	GEO	GDS1490	2.95939086292	Mus musculus	Neural tissue profiling	tissue	hippocampal formation	skeletal muscle
GDS1956_disease.state_2_6_mod.txt	GEO	GDS1956	-1.61077708801	Homo sapiens	Various muscle diseases (HG-U133A)	disease.state	amyotophic lateral sclerosis	dysferlin mutation
E-GEOD-11990_36_1_2_mod.txt	ArrayExpress	E-GEOD-11990	-1.24279986965	Mus musculus	Gene expression profiling of mouse p53-deficient epidermal carcinoma defines molecular determinants of human cancer malignancy (training dataset)	FactorValue..TISSUE.	skin	squamous cell carcinoma
GDS3142_tissue_13_14_mod.txt	GEO	GDS3142	-1.752878653	Mus musculus	Various tissues	tissue	muscle	ovary
E-GEOD-30138_43_1_4_mod.txt	ArrayExpress	E-GEOD-30138	3.14981762099	Mus musculus	Global Gene Expression Analysis of Murine Limb Development	FactorValue..DEVELOPMENTAL.STAGE.	E10.5	E13.5
E-GEOD-24207_47_3_12_mod.txt	ArrayExpress	E-GEOD-24207	2.58300340045	Mus musculus	mRNA analysis in different mouse tissues	FactorValue..TISSUE.	bone marrow	muscle
E-MEXP-2320_39_1_3_mod.txt	ArrayExpress	E-MEXP-2320	1.61341532069	Mus musculus	Transcription profiling of mouse long-lived S6K1 -/- strain females compared to wild types	Factor.Value.OrganismPart.	fat	muscle
GDS3142_tissue_13_20_mod.txt	GEO	GDS3142	-1.79372025841	Mus musculus	Various tissues	tissue	muscle	spleen
GDS2701_time_3_5_mod.txt	GEO	GDS2701	-3.07727480899	Mus musculus	Contraction- and freeze-injured skeletal muscles: time course	time	6 h	control
E-GEOD-24207_47_5_9_mod.txt	ArrayExpress	E-GEOD-24207	-3.39545688931	Mus musculus	mRNA analysis in different mouse tissues	FactorValue..TISSUE.	diaphragm	kidney
GDS3142_tissue_1_5_mod.txt	GEO	GDS3142	2.06505840751	Mus musculus	Various tissues	tissue	adipose tissue	diaphragm
GDS3142_tissue_3_13_mod.txt	GEO	GDS3142	1.56727408886	Mus musculus	Various tissues	tissue	bone marrow	muscle
E-GEOD-15155_34_1_2_mod.txt	ArrayExpress	E-GEOD-15155	-1.31451725964	Mus musculus	Gene profiling of quiescent and activated skeletal muscle satellite cells by an in vivo approach	FactorValue..ORIGIN.	cultured	freshly isolated
GDS1490_tissue_27_33_mod.txt	GEO	GDS1490	-2.76403034432	Mus musculus	Neural tissue profiling	tissue	skeletal muscle	thymus
GDS3113_tissue_6_21_mod.txt	GEO	GDS3113	3.87651084599	Homo sapiens	Various normal tissues	tissue	fetal kidney	skeletal muscle
GDS3142_tissue_5_6_mod.txt	GEO	GDS3142	-1.79784803088	Mus musculus	Various tissues	tissue	diaphragm	embryonic stem cells
GDS2001_tissue_2_3_mod.txt	GEO	GDS2001	2.09839374364	Mus musculus	Utrophin/dystrophin-deficient double mutant and dystrophin-deficient mdx mutant skeletal muscles	tissue	heart	leg
GDS1451_agent_1_3_mod.txt	GEO	GDS1451	1.35675082888	Rattus norvegicus	Toxicants effect on liver: pooled and individual sample comparison	agent	clofibrate	valproic acid
GDS1956_disease.state_2_4_mod.txt	GEO	GDS1956	-1.11914418533	Homo sapiens	Various muscle diseases (HG-U133A)	disease.state	amyotophic lateral sclerosis	Calpain 3 mutation
GDS1490_tissue_12_27_mod.txt	GEO	GDS1490	2.93097517286	Mus musculus	Neural tissue profiling	tissue	hippocampus CA1	skeletal muscle
GDS3113_tissue_21_29_mod.txt	GEO	GDS3113	-4.27528976957	Homo sapiens	Various normal tissues	tissue	skeletal muscle	tonsil
GDS2956_tissue_1_2_mod.txt	GEO	GDS2956	4.35510257877	Rattus norvegicus	Roux-en-Y gastric bypass model	tissue	hypothalamus	subcutaneous abdominal fat
GDS3142_tissue_1_13_mod.txt	GEO	GDS3142	1.77164788639	Mus musculus	Various tissues	tissue	adipose tissue	muscle
GDS1490_tissue_4_27_mod.txt	GEO	GDS1490	2.04663576287	Mus musculus	Neural tissue profiling	tissue	brown adipose tissue	skeletal muscle
GDS586_time_1_3_mod.txt	GEO	GDS586	-1.14582759026	Mus musculus	Myogenic differentiation timecourse (MG-U74A)	time	0 d	-1 d
GDS589_tissue_4_25_mod.txt	GEO	GDS589	3.9526418577	Rattus norvegicus	Multiple normal tissue gene expression across strains	tissue	cerebellum	skeletal muscle
GDS3142_tissue_2_5_mod.txt	GEO	GDS3142	2.14057377238	Mus musculus	Various tissues	tissue	adrenal gland	diaphragm
GDS2312_tissue_1_2_mod.txt	GEO	GDS2312	1.35256336241	Mus musculus	Nemaline myopathy model: various skeletal muscles	tissue	diaphragm	extensor digitorum longus
GDS3142_tissue_5_7_mod.txt	GEO	GDS3142	-1.8561989084	Mus musculus	Various tissues	tissue	diaphragm	eye

## Sheet: Concordant
Gene symbol	Description	# of experiments with MYOD1	%concordant	Pearson Coef	Pearson p-val.
MYOD1	myogenic differentiation 1 [Source:HGNC Symbol;Acc:7611]	337
MYOG	myogenin (myogenic factor 4) [Source:HGNC Symbol;Acc:7612]	182	98.9010989011	0.758868991938	2.30133901686e-64
TNNC2	troponin C type 2 (fast) [Source:HGNC Symbol;Acc:11944]	197	94.4162436548	0.728786570254	4.74972530374e-57
CHRNB1	cholinergic receptor, nicotinic, beta 1 (muscle) [Source:HGNC Symbol;Acc:1961]	157	96.8152866242	0.728536953847	5.41043606588e-57
TNNT1	troponin T type 1 (skeletal, slow) [Source:HGNC Symbol;Acc:11948]	191	90.0523560209	0.722524949559	1.19344730388e-55
MYL1	myosin, light chain 1, alkali; skeletal, fast [Source:HGNC Symbol;Acc:7582]	200	91.0	0.721139633129	2.40645919676e-55
ACTN2	actinin, alpha 2 [Source:HGNC Symbol;Acc:164]	200	90.5	0.720638051758	3.09885448055e-55
CDH15	cadherin 15, type 1, M-cadherin (myotubule) [Source:HGNC Symbol;Acc:1754]	129	98.4496124031	0.719961990607	4.35357823687e-55
SIX1	SIX homeobox 1 [Source:HGNC Symbol;Acc:10887]	148	97.2972972973	0.704808252769	6.88390509629e-52
ANK1	ankyrin 1, erythrocytic [Source:HGNC Symbol;Acc:492]	195	94.358974359	0.701590578309	3.09751849415e-51
VGLL2	vestigial like 2 (Drosophila) [Source:HGNC Symbol;Acc:20232]	134	100.0	0.698433715047	1.32856580987e-50
TNNI1	troponin I type 1 (skeletal, slow) [Source:HGNC Symbol;Acc:11945]	167	93.4131736527	0.694278910698	8.77326738488e-50
APOBEC2	apolipoprotein B mRNA editing enzyme, catalytic polypeptide-like 2 [Source:HGNC Symbol;Acc:605]	193	91.1917098446	0.689168308691	8.56162669084e-49
ITGB1BP2	integrin beta 1 binding protein (melusin) 2 [Source:HGNC Symbol;Acc:6154]	167	95.8083832335	0.68560487531	4.07726122254e-48
MYOZ2	myozenin 2 [Source:HGNC Symbol;Acc:1330]	192	90.1041666667	0.68531897297	4.61667775292e-48
MYBPH	myosin binding protein H [Source:HGNC Symbol;Acc:7552]	173	95.3757225434	0.68253131737	1.53898141898e-47
CAV3	caveolin 3 [Source:HGNC Symbol;Acc:1529]	171	94.7368421053	0.681716114901	2.18296590951e-47
TNNC1	troponin C type 1 (slow) [Source:HGNC Symbol;Acc:11943]	173	89.5953757225	0.681502493641	2.39192463522e-47
LDB3	LIM domain binding 3 [Source:HGNC Symbol;Acc:15710]	201	89.0547263682	0.677434917183	1.34362328883e-46
MYOM2	myomesin (M-protein) 2, 165kDa [Source:HGNC Symbol;Acc:7614]	176	93.75	0.675167305675	3.47463482976e-46
MYF6	myogenic factor 6 (herculin) [Source:HGNC Symbol;Acc:7566]	163	93.2515337423	0.674757122399	4.12245009496e-46
HSPB3	heat shock 27kDa protein 3 [Source:HGNC Symbol;Acc:5248]	163	93.2515337423	0.671616168452	1.51264854772e-45
SMPX	small muscle protein, X-linked [Source:HGNC Symbol;Acc:11122]	191	86.9109947644	0.667720879391	7.41884612322e-45
RYR1	ryanodine receptor 1 (skeletal) [Source:HGNC Symbol;Acc:10483]	185	90.8108108108	0.665707355706	1.67197958566e-44
RXRG	retinoid X receptor, gamma [Source:HGNC Symbol;Acc:10479]	154	88.961038961	0.664916415151	2.29668384079e-44
TNNT3	troponin T type 3 (skeletal, fast) [Source:HGNC Symbol;Acc:11950]	183	89.6174863388	0.664657275794	2.54788938467e-44
CACNG1	calcium channel, voltage-dependent, gamma subunit 1 [Source:HGNC Symbol;Acc:1405]	117	98.2905982906	0.663350110779	4.29423273403e-44
TNNI2	troponin I type 2 (skeletal, fast) [Source:HGNC Symbol;Acc:11946]	177	89.2655367232	0.6556062887	8.97044899571e-43
MYH7	myosin, heavy chain 7, cardiac muscle, beta [Source:HGNC Symbol;Acc:7577]	176	88.6363636364	0.654501640984	1.37384981806e-42
HRC	histidine rich calcium binding protein [Source:HGNC Symbol;Acc:5178]	158	92.4050632911	0.65360310202	1.94066867281e-42
RAPSN	receptor-associated protein of the synapse [Source:HGNC Symbol;Acc:9863]	130	91.5384615385	0.652481608376	2.98174583635e-42
MYF5	myogenic factor 5 [Source:HGNC Symbol;Acc:7565]	127	98.4251968504	0.652288559101	3.20994395217e-42
SYNPO2L	synaptopodin 2-like [Source:HGNC Symbol;Acc:23532]	173	97.6878612717	0.651747523347	3.94575984898e-42
MYOM1	myomesin 1, 185kDa [Source:HGNC Symbol;Acc:7613]	184	91.3043478261	0.648735751482	1.23525985654e-41
CASQ1	calsequestrin 1 (fast-twitch, skeletal muscle) [Source:HGNC Symbol;Acc:1512]	156	91.6666666667	0.646854343949	2.50340466336e-41
CACNB1	calcium channel, voltage-dependent, beta 1 subunit [Source:HGNC Symbol;Acc:1401]	157	91.0828025478	0.644210837449	6.69776010875e-41
CASQ2	calsequestrin 2 (cardiac muscle) [Source:HGNC Symbol;Acc:1513]	178	90.4494382022	0.6420795939	1.47044084096e-40
RTN2	reticulon 2 [Source:HGNC Symbol;Acc:10468]	172	91.8604651163	0.642006235278	1.51061783519e-40
TRDN	triadin [Source:HGNC Symbol;Acc:12261]	154	92.2077922078	0.637275757119	8.46030295327e-40
PGAM2	phosphoglycerate mutase 2 (muscle) [Source:HGNC Symbol;Acc:8889]	195	83.5897435897	0.635809878387	1.43417729462e-39
PKIA	protein kinase (cAMP-dependent, catalytic) inhibitor alpha [Source:HGNC Symbol;Acc:9017]	188	88.2978723404	0.633151914701	3.70750115793e-39
JPH1	junctophilin 1 [Source:HGNC Symbol;Acc:14201]	116	93.1034482759	0.632927338377	4.01557877794e-39
SGCG	sarcoglycan, gamma (35kDa dystrophin-associated glycoprotein) [Source:HGNC Symbol;Acc:10809]	158	90.5063291139	0.632694631417	4.36154115678e-39
SCN4A	sodium channel, voltage-gated, type IV, alpha subunit [Source:HGNC Symbol;Acc:10591]	117	98.2905982906	0.631043583731	7.82373303281e-39
MYH1	myosin, heavy chain 1, skeletal muscle, adult [Source:HGNC Symbol;Acc:7567]	123	90.243902439	0.630755265487	8.66109532954e-39
ATP2A1	ATPase, Ca++ transporting, cardiac muscle, fast twitch 1 [Source:HGNC Symbol;Acc:811]	193	91.7098445596	0.628283503205	2.06179287063e-38
MYOZ1	myozenin 1 [Source:HGNC Symbol;Acc:13752]	148	92.5675675676	0.626731922377	3.53966642599e-38
ACTA1	actin, alpha 1, skeletal muscle [Source:HGNC Symbol;Acc:129]	175	84.0	0.625289295154	5.83462050851e-38
MEF2C	myocyte enhancer factor 2C [Source:HGNC Symbol;Acc:6996]	205	85.3658536585	0.623156201948	1.21582880096e-37
TRIM54	tripartite motif containing 54 [Source:HGNC Symbol;Acc:16008]	131	88.5496183206	0.622864523823	1.34363728792e-37
TBX1	T-box 1 [Source:HGNC Symbol;Acc:11592]	111	95.4954954955	0.622822985729	1.36288847377e-37
UCP3	uncoupling protein 3 (mitochondrial, proton carrier) [Source:HGNC Symbol;Acc:12519]	140	91.4285714286	0.622550211009	1.49626697252e-37
DDIT4L	DNA-damage-inducible transcript 4-like [Source:HGNC Symbol;Acc:30555]	141	87.9432624113	0.621254319948	2.32863858487e-37
ACTN3	actinin, alpha 3 [Source:HGNC Symbol;Acc:165]	130	87.6923076923	0.621248209167	2.33348910301e-37
MYH2	myosin, heavy chain 2, skeletal muscle, adult [Source:HGNC Symbol;Acc:7572]	140	85.0	0.619911718705	3.67429308592e-37
TMEM38A	transmembrane protein 38A [Source:HGNC Symbol;Acc:28462]	130	93.0769230769	0.618988389079	5.02152999012e-37
EBF2	early B-cell factor 2 [Source:HGNC Symbol;Acc:19090]	123	93.4959349593	0.61894758624	5.09120650337e-37
MYBPC2	myosin binding protein C, fast type [Source:HGNC Symbol;Acc:7550]	159	91.8238993711	0.617713463547	7.71646158259e-37
TBX15	T-box 15 [Source:HGNC Symbol;Acc:11594]	153	92.8104575163	0.615337609649	1.70941667354e-36
SNTA1	syntrophin, alpha 1 [Source:HGNC Symbol;Acc:11167]	145	90.3448275862	0.61518788992	1.79687386083e-36
TMOD4	tropomodulin 4 (muscle) [Source:HGNC Symbol;Acc:11874]	95	94.7368421053	0.614552173662	2.22023338187e-36
CACNA1S	calcium channel, voltage-dependent, L type, alpha 1S subunit [Source:HGNC Symbol;Acc:1397]	129	91.4728682171	0.613775160413	2.87354597007e-36
DUSP13	dual specificity phosphatase 13 [Source:HGNC Symbol;Acc:19681]	135	91.1111111111	0.612752584818	4.03056943548e-36
PYGM	phosphorylase, glycogen, muscle [Source:HGNC Symbol;Acc:9726]	176	86.3636363636	0.612636137142	4.18857608487e-36
ALPK3	alpha-kinase 3 [Source:HGNC Symbol;Acc:17574]	124	92.7419354839	0.611336151498	6.42731896001e-36
SIX2	SIX homeobox 2 [Source:HGNC Symbol;Acc:10888]	109	88.0733944954	0.611288513601	6.5287211203e-36
PRRX1	paired related homeobox 1 [Source:HGNC Symbol;Acc:9142]	172	89.5348837209	0.609739515896	1.08456089884e-35
RPL3L	ribosomal protein L3-like [Source:HGNC Symbol;Acc:10351]	133	92.4812030075	0.609726926655	1.08903151545e-35
COX6A2	cytochrome c oxidase subunit VIa polypeptide 2 [Source:HGNC Symbol;Acc:2279]	170	87.0588235294	0.609418404328	1.20447289541e-35
MYL3	myosin, light chain 3, alkali; ventricular, skeletal, slow [Source:HGNC Symbol;Acc:7584]	176	82.3863636364	0.609366344971	1.22511169924e-35
ADCY2	adenylate cyclase 2 (brain) [Source:HGNC Symbol;Acc:233]	169	84.6153846154	0.607026549476	2.62061561421e-35
CSRP3	cysteine and glycine-rich protein 3 (cardiac LIM protein) [Source:HGNC Symbol;Acc:2472]	181	87.2928176796	0.606398601032	3.21043290584e-35
PITX2	paired-like homeodomain 2 [Source:HGNC Symbol;Acc:9005]	171	86.5497076023	0.60630215844	3.31196859196e-35
SSPN	sarcospan [Source:HGNC Symbol;Acc:11322]	177	89.2655367232	0.605984410288	3.66949524079e-35
HSPB2	HSPB2	147	87.7551020408	0.605434650287	4.38042037365e-35
HFE2	hemochromatosis type 2 (juvenile) [Source:HGNC Symbol;Acc:4887]	138	98.5507246377	0.601979523908	1.32272903446e-34
PHKG1	phosphorylase kinase, gamma 1 (muscle) [Source:HGNC Symbol;Acc:8930]	145	97.9310344828	0.601951569469	1.33453589466e-34
ENO3	enolase 3 (beta, muscle) [Source:HGNC Symbol;Acc:3354]	180	75.5555555556	0.600034741017	2.44941637167e-34
SLN	sarcolipin [Source:HGNC Symbol;Acc:11089]	146	89.0410958904	0.598594533393	3.85524222545e-34
CAP2	CAP, adenylate cyclase-associated protein, 2 (yeast) [Source:HGNC Symbol;Acc:20039]	181	88.3977900552	0.594918620426	1.21436668194e-33
LMCD1	LIM and cysteine-rich domains 1 [Source:HGNC Symbol;Acc:6633]	163	88.3435582822	0.593862825164	1.68379953276e-33
MYL2	myosin, light chain 2, regulatory, cardiac, slow [Source:HGNC Symbol;Acc:7583]	161	83.850931677	0.592975780002	2.21381061419e-33
CACNG6	calcium channel, voltage-dependent, gamma subunit 6 [Source:HGNC Symbol;Acc:13625]	92	95.652173913	0.592781664774	2.35017301749e-33
AMPD1	adenosine monophosphate deaminase 1 [Source:HGNC Symbol;Acc:468]	123	92.6829268293	0.591697483975	3.27919043021e-33
PDK2	pyruvate dehydrogenase kinase, isozyme 2 [Source:HGNC Symbol;Acc:8810]	162	90.7407407407	0.590415845168	4.85375693943e-33
PHKA1	phosphorylase kinase, alpha 1 (muscle) [Source:HGNC Symbol;Acc:8925]	132	89.3939393939	0.589283256399	6.85412666468e-33
LRRC20	leucine rich repeat containing 20 [Source:HGNC Symbol;Acc:23421]	128	89.0625	0.588201144988	9.51911891605e-33
KCNJ12	potassium inwardly-rectifying channel, subfamily J, member 12 [Source:HGNC Symbol;Acc:6258]	132	91.6666666667	0.58788337874	1.04805295972e-32
POPDC3	popeye domain containing 3 [Source:HGNC Symbol;Acc:17649]	135	91.1111111111	0.587810488569	1.07142516168e-32
EEF1A2	eukaryotic translation elongation factor 1 alpha 2 [Source:HGNC Symbol;Acc:3192]	155	85.8064516129	0.587522088518	1.16906109591e-32
DNAJB5	DnaJ (Hsp40) homolog, subfamily B, member 5 [Source:HGNC Symbol;Acc:14887]	144	86.8055555556	0.586933585087	1.39639254532e-32
ASB12	ankyrin repeat and SOCS box containing 12 [Source:HGNC Symbol;Acc:19763]	103	89.3203883495	0.586838601602	1.43697077161e-32
TCAP	titin-cap (telethonin) [Source:HGNC Symbol;Acc:11610]	139	86.3309352518	0.586730795527	1.48444058234e-32
HSPB7	heat shock 27kDa protein family, member 7 (cardiovascular) [Source:HGNC Symbol;Acc:5249]	159	84.9056603774	0.586630612533	1.5299417588e-32
FBP2	fructose-1,6-bisphosphatase 2 [Source:HGNC Symbol;Acc:3607]	150	76.0	0.586099621524	1.79512938823e-32
CORO6	coronin 6 [Source:HGNC Symbol;Acc:21356]	99	94.9494949495	0.585940059298	1.88335294452e-32
DES	desmin [Source:HGNC Symbol;Acc:2770]	170	86.4705882353	0.585524787052	2.1335600709e-32
CDH13	cadherin 13, H-cadherin (heart) [Source:HGNC Symbol;Acc:1753]	132	90.9090909091	0.585123875	2.40619542832e-32
GPC1	glypican 1 [Source:HGNC Symbol;Acc:4449]	142	92.9577464789	0.583547844083	3.85422381241e-32
ZFP106	zinc finger protein 106 homolog (mouse) [Source:HGNC Symbol;Acc:23240]	136	84.5588235294	0.582927441814	4.63633327214e-32
AK1	adenylate kinase 1 [Source:HGNC Symbol;Acc:361]	158	88.6075949367	0.580960276381	8.30727759423e-32
TMOD1	tropomodulin 1 [Source:HGNC Symbol;Acc:11871]	156	89.7435897436	0.580151188019	1.0547174946e-31
KCNA7	potassium voltage-gated channel, shaker-related subfamily, member 7 [Source:HGNC Symbol;Acc:6226]	85	97.6470588235	0.579829760456	1.15942885747e-31
CKMT2	creatine kinase, mitochondrial 2 (sarcomeric) [Source:HGNC Symbol;Acc:1996]	146	86.301369863	0.579156489962	1.41319680258e-31
STAC3	SH3 and cysteine rich domain 3 [Source:HGNC Symbol;Acc:28423]	95	98.9473684211	0.578627142201	1.65061757011e-31
GYS1	glycogen synthase 1 (muscle) [Source:HGNC Symbol;Acc:4706]	149	89.2617449664	0.575594854795	3.9960715029e-31
MEF2D	myocyte enhancer factor 2D [Source:HGNC Symbol;Acc:6997]	118	90.6779661017	0.575524542346	4.07839975365e-31
COL19A1	collagen, type XIX, alpha 1 [Source:HGNC Symbol;Acc:2196]	86	91.8604651163	0.573957548397	6.41675263161e-31
EGLN1	egl nine homolog 1 (C. elegans) [Source:HGNC Symbol;Acc:1232]	127	92.125984252	0.572819337005	8.90475536644e-31
ADSSL1	adenylosuccinate synthase like 1 [Source:HGNC Symbol;Acc:20093]	110	90.0	0.570929028754	1.53017275626e-30
CKM	creatine kinase, muscle [Source:HGNC Symbol;Acc:1994]	154	89.6103896104	0.570859172815	1.56099013705e-30
UBE2D1	ubiquitin-conjugating enzyme E2D 1 [Source:HGNC Symbol;Acc:12474]	144	91.6666666667	0.570739525489	1.61520423937e-30
ASB8	ankyrin repeat and SOCS box containing 8 [Source:HGNC Symbol;Acc:17183]	125	86.4	0.570630312788	1.66631205437e-30
SLCO5A1	solute carrier organic anion transporter family, member 5A1 [Source:HGNC Symbol;Acc:19046]	125	84.0	0.570447541331	1.7554406424e-30
NRAP	nebulin-related anchoring protein [Source:HGNC Symbol;Acc:7988]	149	86.5771812081	0.569360151143	2.39182707973e-30
PRKCQ	protein kinase C, theta [Source:HGNC Symbol;Acc:9410]	128	92.96875	0.568355048732	3.18027550689e-30
SH3BGR	SH3 domain binding glutamic acid-rich protein [Source:HGNC Symbol;Acc:10822]	127	92.9133858268	0.567983464243	3.53266237187e-30
SLC2A4	solute carrier family 2 (facilitated glucose transporter), member 4 [Source:HGNC Symbol;Acc:11009]	158	80.3797468354	0.567334749827	4.2426563214e-30
SMARCD3	SWI/SNF related, matrix associated, actin dependent regulator of chromatin, subfamily d, member 3 [Source:HGNC Symbol;Acc:11108]	176	84.6590909091	0.566885038845	4.8158364062e-30
AGL	amylo-alpha-1, 6-glucosidase, 4-alpha-glucanotransferase [Source:HGNC Symbol;Acc:321]	144	89.5833333333	0.566332378557	5.62585954301e-30
PDLIM3	PDZ and LIM domain 3 [Source:HGNC Symbol;Acc:20767]	214	82.2429906542	0.566184231598	5.86497376628e-30
SGCA	sarcoglycan, alpha (50kDa dystrophin-associated glycoprotein) [Source:HGNC Symbol;Acc:10805]	125	86.4	0.564739818455	8.79103313364e-30
DMRT2	doublesex and mab-3 related transcription factor 2 [Source:HGNC Symbol;Acc:2935]	89	86.5168539326	0.564307759799	9.91860701612e-30
CAPN3	calpain 3, (p94) [Source:HGNC Symbol;Acc:1480]	177	79.6610169492	0.563668353307	1.18542138453e-29
ASB2	ankyrin repeat and SOCS box containing 2 [Source:HGNC Symbol;Acc:16012]	115	88.6956521739	0.56305185845	1.40721887977e-29
KBTBD10	kelch repeat and BTB (POZ) domain containing 10 [Source:HGNC Symbol;Acc:16905]	125	90.4	0.56289552014	1.46969326823e-29
SVIL	supervillin [Source:HGNC Symbol;Acc:11480]	210	78.5714285714	0.562480340807	1.64921427925e-29
CFL2	cofilin 2 (muscle) [Source:HGNC Symbol;Acc:1875]	142	85.2112676056	0.561101748835	2.41525851611e-29
ATP1B4	ATPase, Na+/K+ transporting, beta 4 polypeptide [Source:HGNC Symbol;Acc:808]	94	93.6170212766	0.560189009126	3.10625092212e-29
SRPK3	SRSF protein kinase 3 [Source:HGNC Symbol;Acc:11402]	139	100.0	0.559194089494	4.08285583837e-29
ASB10	ankyrin repeat and SOCS box containing 10 [Source:HGNC Symbol;Acc:17185]	99	91.9191919192	0.558880595459	4.44930057661e-29
PFKM	phosphofructokinase, muscle [Source:HGNC Symbol;Acc:8877]	153	84.9673202614	0.558483225399	4.96077716189e-29
LMOD3	leiomodin 3 (fetal) [Source:HGNC Symbol;Acc:6649]	91	98.9010989011	0.558208798807	5.34748244524e-29
DTNA	dystrobrevin, alpha [Source:HGNC Symbol;Acc:3057]	183	85.7923497268	0.558206751325	5.35047671207e-29
FABP3	fatty acid binding protein 3, muscle and heart (mammary-derived growth inhibitor) [Source:HGNC Symbol;Acc:3557]	201	75.6218905473	0.557974745692	5.70071187613e-29
CHRNA1	cholinergic receptor, nicotinic, alpha 1 (muscle) [Source:HGNC Symbol;Acc:1955]	100	90.0	0.556642802974	8.19595580811e-29
AMOT	angiomotin [Source:HGNC Symbol;Acc:17810]	144	90.2777777778	0.554519463966	1.4571070483e-28
FNDC5	fibronectin type III domain containing 5 [Source:HGNC Symbol;Acc:20240]	106	95.2830188679	0.553136797711	2.11473393132e-28
FUNDC2	FUN14 domain containing 2 [Source:HGNC Symbol;Acc:24925]	109	92.6605504587	0.552912335827	2.24618494402e-28
ART3	ADP-ribosyltransferase 3 [Source:HGNC Symbol;Acc:725]	127	85.8267716535	0.550974730883	3.77312114046e-28
ASB5	ankyrin repeat and SOCS box containing 5 [Source:HGNC Symbol;Acc:17180]	95	93.6842105263	0.550898659811	3.85047608245e-28
MAST2	microtubule associated serine/threonine kinase 2 [Source:HGNC Symbol;Acc:19035]	129	89.1472868217	0.550815775188	3.93654273651e-28
HRASLS	HRAS-like suppressor [Source:HGNC Symbol;Acc:14922]	124	87.9032258065	0.550590791089	4.17985709912e-28
ANGPTL1	angiopoietin-like 1 [Source:HGNC Symbol;Acc:489]	135	94.8148148148	0.550347478161	4.4597207438e-28
PACSIN3	protein kinase C and casein kinase substrate in neurons 3 [Source:HGNC Symbol;Acc:8572]	148	85.1351351351	0.54852844892	7.22776219673e-28
PRKAA2	protein kinase, AMP-activated, alpha 2 catalytic subunit [Source:HGNC Symbol;Acc:9377]	128	89.84375	0.548492383595	7.29706974545e-28
CUEDC1	CUE domain containing 1 [Source:HGNC Symbol;Acc:31350]	119	89.9159663866	0.547842266508	8.66511309819e-28
ASB11	ankyrin repeat and SOCS box containing 11 [Source:HGNC Symbol;Acc:17186]	103	90.2912621359	0.54514600072	1.76012010999e-27
PGM1	phosphoglucomutase 1 [Source:HGNC Symbol;Acc:8905]	116	87.9310344828	0.544188601968	2.26025898885e-27
DNASE1L1	deoxyribonuclease I-like 1 [Source:HGNC Symbol;Acc:2957]	112	91.0714285714	0.54323333989	2.89857962781e-27
PPP1R3C	protein phosphatase 1, regulatory subunit 3C [Source:HGNC Symbol;Acc:9293]	156	82.6923076923	0.54272811664	3.30506173443e-27
NEB	nebulin [Source:HGNC Symbol;Acc:7720]	141	88.6524822695	0.541606414685	4.41952122275e-27
SEPW1	selenoprotein W, 1 [Source:HGNC Symbol;Acc:10752]	147	80.9523809524	0.541000737794	5.16796559811e-27
THBS4	thrombospondin 4 [Source:HGNC Symbol;Acc:11788]	165	86.0606060606	0.540484739342	5.90330942929e-27
SCN1B	sodium channel, voltage-gated, type I, beta subunit [Source:HGNC Symbol;Acc:10586]	129	81.3953488372	0.537721004681	1.19911191456e-26
CACNA2D1	calcium channel, voltage-dependent, alpha 2/delta subunit 1 [Source:HGNC Symbol;Acc:1399]	160	86.875	0.536635024177	1.58131291075e-26
FYCO1	FYVE and coiled-coil domain containing 1 [Source:HGNC Symbol;Acc:14673]	132	87.1212121212	0.536338751435	1.70499608741e-26
BAG3	BCL2-associated athanogene 3 [Source:HGNC Symbol;Acc:939]	118	88.9830508475	0.53590844879	1.90180964722e-26
DNAJA4	DnaJ (Hsp40) homolog, subfamily A, member 4 [Source:HGNC Symbol;Acc:14885]	155	84.5161290323	0.533285733605	3.68869371339e-26
P2RY2	purinergic receptor P2Y, G-protein coupled, 2 [Source:HGNC Symbol;Acc:8541]	107	92.523364486	0.533055157854	3.90882539364e-26
RRAGD	Ras-related GTP binding D [Source:HGNC Symbol;Acc:19903]	128	87.5	0.531661127415	5.54411681021e-26
HOXA10	homeobox A10 [Source:HGNC Symbol;Acc:5100]	152	86.8421052632	0.531599990497	5.62954173474e-26
ASB15	ankyrin repeat and SOCS box containing 15 [Source:HGNC Symbol;Acc:19767]	79	96.2025316456	0.531597145648	5.63354823021e-26
JTV1	JTV1	96	88.5416666667	0.53013321831	8.11688515118e-26
NXN	nucleoredoxin [Source:HGNC Symbol;Acc:18008]	100	90.0	0.529794835269	8.82960809047e-26
ART1	ADP-ribosyltransferase 1 [Source:HGNC Symbol;Acc:723]	150	92.0	0.527305876899	1.63508147326e-25
PALMD	palmdelphin [Source:HGNC Symbol;Acc:15846]	147	82.3129251701	0.525093395851	2.81555304917e-25
KIF1C	kinesin family member 1C [Source:HGNC Symbol;Acc:6317]	121	83.4710743802	0.525059693843	2.83887077594e-25
DMPK	dystrophia myotonica-protein kinase [Source:HGNC Symbol;Acc:2933]	115	87.8260869565	0.524834938938	2.99931960807e-25
NDUFS7	NADH dehydrogenase (ubiquinone) Fe-S protein 7, 20kDa (NADH-coenzyme Q reductase) [Source:HGNC Symbol;Acc:7714]	121	85.9504132231	0.524525546714	3.23491102495e-25
POPDC2	popeye domain containing 2 [Source:HGNC Symbol;Acc:17648]	123	85.3658536585	0.523589794475	4.06425121291e-25
EYA4	eyes absent homolog 4 (Drosophila) [Source:HGNC Symbol;Acc:3522]	137	86.8613138686	0.523199226426	4.46951185142e-25
FHL1	four and a half LIM domains 1 [Source:HGNC Symbol;Acc:3702]	185	84.8648648649	0.522781183325	4.9474838122e-25
NDUFB10	NADH dehydrogenase (ubiquinone) 1 beta subcomplex, 10, 22kDa [Source:HGNC Symbol;Acc:7696]	86	86.0465116279	0.522576591323	5.19944196618e-25
TPM1	tropomyosin 1 (alpha) [Source:HGNC Symbol;Acc:12010]	217	71.8894009217	0.52170578375	6.42113982113e-25
SLC25A11	solute carrier family 25 (mitochondrial carrier; oxoglutarate carrier), member 11 [Source:HGNC Symbol;Acc:10981]	127	85.0393700787	0.520845336387	7.90529244355e-25
CSDA	cold shock domain protein A [Source:HGNC Symbol;Acc:2428]	179	72.625698324	0.520167103738	9.30934083326e-25
PTP4A3	protein tyrosine phosphatase type IVA, member 3 [Source:HGNC Symbol;Acc:9636]	156	82.6923076923	0.519152755946	1.1879807642e-24
NFIX	nuclear factor I/X (CCAAT-binding transcription factor) [Source:HGNC Symbol;Acc:7788]	206	84.4660194175	0.519128005759	1.19505724686e-24
FLII	flightless I homolog (Drosophila) [Source:HGNC Symbol;Acc:3750]	90	88.8888888889	0.519004835483	1.23089657938e-24
ANKRD2	ankyrin repeat domain 2 (stretch responsive muscle) [Source:HGNC Symbol;Acc:495]	136	90.4411764706	0.517425901543	1.79583071034e-24
ANGPTL2	angiopoietin-like 2 [Source:HGNC Symbol;Acc:490]	121	84.2975206612	0.517425122961	1.79616435735e-24
NFE2L1	nuclear factor (erythroid-derived 2)-like 1 [Source:HGNC Symbol;Acc:7781]	119	77.3109243697	0.516913074161	2.02937283165e-24
FZD9	frizzled family receptor 9 [Source:HGNC Symbol;Acc:4047]	80	95.0	0.515715686122	2.69765097221e-24
PRKAB2	protein kinase, AMP-activated, beta 2 non-catalytic subunit [Source:HGNC Symbol;Acc:9379]	100	95.0	0.515674368591	2.72422423836e-24
TRIP10	thyroid hormone receptor interactor 10 [Source:HGNC Symbol;Acc:12304]	124	79.8387096774	0.515414777506	2.89718460842e-24
KLHL21	kelch-like 21 (Drosophila) [Source:HGNC Symbol;Acc:29041]	109	89.9082568807	0.513531193641	4.52134262043e-24
CLCN1	chloride channel, voltage-sensitive 1 [Source:HGNC Symbol;Acc:2019]	105	89.5238095238	0.51349302293	4.56217608494e-24
TACC2	transforming, acidic coiled-coil containing protein 2 [Source:HGNC Symbol;Acc:11523]	145	86.2068965517	0.513421587045	4.63957464871e-24
ACO2	aconitase 2, mitochondrial [Source:HGNC Symbol;Acc:118]	125	84.0	0.51305794625	5.05408956934e-24
CARM1	coactivator-associated arginine methyltransferase 1 [Source:HGNC Symbol;Acc:23393]	92	90.2173913043	0.512220722873	6.1523268942e-24
COX7A1	cytochrome c oxidase subunit VIIa polypeptide 1 (muscle) [Source:HGNC Symbol;Acc:2287]	143	80.4195804196	0.512062145873	6.38539321464e-24
ACYP2	acylphosphatase 2, muscle type [Source:HGNC Symbol;Acc:180]	120	85.8333333333	0.511963272307	6.53509467956e-24
PPP3CB	protein phosphatase 3, catalytic subunit, beta isozyme [Source:HGNC Symbol;Acc:9315]	126	80.9523809524	0.511050114789	8.09182124598e-24
MDH2	malate dehydrogenase 2, NAD (mitochondrial) [Source:HGNC Symbol;Acc:6971]	98	81.6326530612	0.509032354543	1.29449855596e-23
OSBPL6	oxysterol binding protein-like 6 [Source:HGNC Symbol;Acc:16388]	94	85.1063829787	0.508125988744	1.59705999524e-23
PPP1R14C	protein phosphatase 1, regulatory (inhibitor) subunit 14C [Source:HGNC Symbol;Acc:14952]	128	85.9375	0.508071953867	1.61715214447e-23
ADSL	adenylosuccinate lyase [Source:HGNC Symbol;Acc:291]	113	85.8407079646	0.507507475667	1.84252867397e-23
GPD1	glycerol-3-phosphate dehydrogenase 1 (soluble) [Source:HGNC Symbol;Acc:4455]	153	83.660130719	0.50735111153	1.91025679146e-23
RORC	RAR-related orphan receptor C [Source:HGNC Symbol;Acc:10260]	117	86.3247863248	0.504595323535	3.59810535261e-23
NFATC1	nuclear factor of activated T-cells, cytoplasmic, calcineurin-dependent 1 [Source:HGNC Symbol;Acc:7775]	149	89.2617449664	0.504136003481	3.99635781313e-23
MYLPF	myosin light chain, phosphorylatable, fast skeletal muscle [Source:HGNC Symbol;Acc:29824]	153	92.1568627451	0.503932911172	4.18601355544e-23
PFN2	profilin 2 [Source:HGNC Symbol;Acc:8882]	158	81.6455696203	0.502693778749	5.5509517453e-23
VAMP5	vesicle-associated membrane protein 5 (myobrevin) [Source:HGNC Symbol;Acc:12646]	137	79.5620437956	0.501285166369	7.639987346e-23
BZW2	basic leucine zipper and W2 domains 2 [Source:HGNC Symbol;Acc:18808]	106	84.9056603774	0.501266124707	7.67297054162e-23
BTBD1	BTB (POZ) domain containing 1 [Source:HGNC Symbol;Acc:1120]	101	83.1683168317	0.501204080139	7.78141816091e-23
PHLDA3	pleckstrin homology-like domain, family A, member 3 [Source:HGNC Symbol;Acc:8934]	99	94.9494949495	0.50098675154	8.17333289909e-23
SLC25A12	solute carrier family 25 (aspartate/glutamate carrier), member 12 [Source:HGNC Symbol;Acc:10982]	107	83.1775700935	0.500635889083	8.84748259548e-23
GBAS	glioblastoma amplified sequence [Source:HGNC Symbol;Acc:4179]	115	81.7391304348	0.500502123015	9.11868192193e-23
PDK4	pyruvate dehydrogenase kinase, isozyme 4 [Source:HGNC Symbol;Acc:8812]	166	78.313253012	0.500303663034	9.53620067249e-23
SHISA2	shisa homolog 2 (Xenopus laevis) [Source:HGNC Symbol;Acc:20366]	127	94.4881889764	0.496081865159	2.4546990335e-22
NEURL	neuralized homolog (Drosophila) [Source:HGNC Symbol;Acc:7761]	114	80.701754386	0.495747969311	2.64381693903e-22
IRS1	insulin receptor substrate 1 [Source:HGNC Symbol;Acc:6125]	138	89.8550724638	0.494071184629	3.83326451065e-22
BCL6	B-cell CLL/lymphoma 6 [Source:HGNC Symbol;Acc:1001]	141	90.780141844	0.490374854288	8.6317999223e-22
NDUFB9	NADH dehydrogenase (ubiquinone) 1 beta subcomplex, 9, 22kDa [Source:HGNC Symbol;Acc:7704]	82	84.1463414634	0.490058940842	9.24768924278e-22
TRIM7	tripartite motif containing 7 [Source:HGNC Symbol;Acc:16278]	56	87.5	0.490012701947	9.34139254411e-22
BIN1	bridging integrator 1 [Source:HGNC Symbol;Acc:1052]	187	79.679144385	0.489870640652	9.63516940161e-22
IPO13	importin 13 [Source:HGNC Symbol;Acc:16853]	92	86.9565217391	0.488979881583	1.16959946588e-21
SLC16A3	solute carrier family 16, member 3 (monocarboxylic acid transporter 4) [Source:HGNC Symbol;Acc:10924]	145	71.724137931	0.48858859323	1.27331736744e-21
UTS2R	urotensin 2 receptor [Source:HGNC Symbol;Acc:4468]	48	97.9166666667	0.488536588838	1.28776686074e-21
RHOQ	ras homolog family member Q [Source:HGNC Symbol;Acc:17736]	145	90.3448275862	0.488314920993	1.35119029207e-21
PADI2	peptidyl arginine deiminase, type II [Source:HGNC Symbol;Acc:18341]	128	82.8125	0.487964336407	1.45783269167e-21
CAMK2A	calcium/calmodulin-dependent protein kinase II alpha [Source:HGNC Symbol;Acc:1460]	131	89.3129770992	0.487403868655	1.64577620875e-21
ANKRD9	ankyrin repeat domain 9 [Source:HGNC Symbol;Acc:20096]	78	89.7435897436	0.486773971971	1.88556772504e-21
FBXO32	F-box protein 32 [Source:HGNC Symbol;Acc:16731]	124	77.4193548387	0.48667589164	1.925879339e-21
PTPLA	protein tyrosine phosphatase-like (proline instead of catalytic arginine), member A [Source:HGNC Symbol;Acc:9639]	144	84.7222222222	0.486359303197	2.06187794789e-21
KPNA3	karyopherin alpha 3 (importin alpha 4) [Source:HGNC Symbol;Acc:6396]	162	82.7160493827	0.486327909068	2.07586872686e-21
TUBA8	tubulin, alpha 8 [Source:HGNC Symbol;Acc:12410]	126	77.7777777778	0.485746482252	2.35254498605e-21
DNAJB4	DnaJ (Hsp40) homolog, subfamily B, member 4 [Source:HGNC Symbol;Acc:14886]	141	87.2340425532	0.48442888416	3.12099442581e-21
PDLIM7	PDZ and LIM domain 7 (enigma) [Source:HGNC Symbol;Acc:22958]	166	71.0843373494	0.484316903893	3.19669557309e-21
TCEA3	transcription elongation factor A (SII), 3 [Source:HGNC Symbol;Acc:11615]	121	84.2975206612	0.484176970649	3.29383888975e-21
MOSPD1	motile sperm domain containing 1 [Source:HGNC Symbol;Acc:25235]	102	98.0392156863	0.483827289439	3.54948091609e-21
CHCHD3	coiled-coil-helix-coiled-coil-helix domain containing 3 [Source:HGNC Symbol;Acc:21906]	127	77.1653543307	0.482699548307	4.51445001855e-21
FKBP3	FK506 binding protein 3, 25kDa [Source:HGNC Symbol;Acc:3719]	114	84.2105263158	0.48198057387	5.26002285355e-21
CRAT	carnitine O-acetyltransferase [Source:HGNC Symbol;Acc:2342]	135	83.7037037037	0.481739232675	5.53650314938e-21
HOXA9	homeobox A9 [Source:HGNC Symbol;Acc:5109]	146	86.9863013699	0.481016548567	6.45283575024e-21
MAPK12	mitogen-activated protein kinase 12 [Source:HGNC Symbol;Acc:6874]	173	72.8323699422	0.480741812016	6.83904929261e-21
PDZRN3	PDZ domain containing ring finger 3 [Source:HGNC Symbol;Acc:17704]	141	86.524822695	0.480647272176	6.97714255785e-21
NDUFS1	NADH dehydrogenase (ubiquinone) Fe-S protein 1, 75kDa (NADH-coenzyme Q reductase) [Source:HGNC Symbol;Acc:7707]	133	84.962406015	0.480386575218	7.37232037049e-21
UBE2G1	ubiquitin-conjugating enzyme E2G 1 [Source:HGNC Symbol;Acc:12482]	125	88.0	0.480018939672	7.96729344286e-21
SGCB	sarcoglycan, beta (43kDa dystrophin-associated glycoprotein) [Source:HGNC Symbol;Acc:10806]	135	83.7037037037	0.479095700682	9.67785012588e-21
HSPB8	heat shock 22kDa protein 8 [Source:HGNC Symbol;Acc:30171]	165	80.0	0.478765327265	1.03739228821e-20
SLC25A4	solute carrier family 25 (mitochondrial carrier; adenine nucleotide translocator), member 4 [Source:HGNC Symbol;Acc:10990]	152	74.3421052632	0.478604583342	1.07301951856e-20
NOL3	nucleolar protein 3 (apoptosis repressor with CARD domain) [Source:HGNC Symbol;Acc:7869]	142	77.4647887324	0.477149603387	1.45543837099e-20
FIBIN	fin bud initiation factor homolog (zebrafish) [Source:HGNC Symbol;Acc:33747]	100	97.0	0.475993298368	1.85248432297e-20
VDAC3	voltage-dependent anion channel 3 [Source:HGNC Symbol;Acc:12674]	101	85.1485148515	0.475907873973	1.88572434376e-20
FEZ2	fasciculation and elongation protein zeta 2 (zygin II) [Source:HGNC Symbol;Acc:3660]	99	90.9090909091	0.474924438609	2.31334328517e-20
SMYD1	SET and MYND domain containing 1 [Source:HGNC Symbol;Acc:20986]	129	91.4728682171	0.474187466705	2.6950668201e-20
VDAC2	voltage-dependent anion channel 2 [Source:HGNC Symbol;Acc:12672]	62	85.4838709677	0.473533698343	3.08515096748e-20
MLYCD	malonyl-CoA decarboxylase [Source:HGNC Symbol;Acc:7150]	89	85.393258427	0.473467675737	3.12750565237e-20
TNMD	tenomodulin [Source:HGNC Symbol;Acc:17757]	139	90.6474820144	0.472182055879	4.07617106615e-20
MRPL33	mitochondrial ribosomal protein L33 [Source:HGNC Symbol;Acc:14487]	83	86.7469879518	0.471649391581	4.5475796676e-20
NEXN	nexilin (F actin binding protein) [Source:HGNC Symbol;Acc:29557]	154	79.8701298701	0.46982474258	6.60632524384e-20
PABPC4	poly(A) binding protein, cytoplasmic 4 (inducible form) [Source:HGNC Symbol;Acc:8557]	139	84.1726618705	0.468846495891	8.06325282285e-20
UBE2B	ubiquitin-conjugating enzyme E2B [Source:HGNC Symbol;Acc:12473]	171	89.4736842105	0.467980393202	9.61406893954e-20
GADD45G	growth arrest and DNA-damage-inducible, gamma [Source:HGNC Symbol;Acc:4097]	109	84.4036697248	0.467600356549	1.03839109038e-19
PRUNE	prune homolog (Drosophila) [Source:HGNC Symbol;Acc:13420]	97	91.7525773196	0.466784949972	1.22461244705e-19
HIVEP2	human immunodeficiency virus type I enhancer binding protein 2 [Source:HGNC Symbol;Acc:4921]	166	76.5060240964	0.466262223712	1.36088742378e-19
MAP2K3	mitogen-activated protein kinase kinase 3 [Source:HGNC Symbol;Acc:6843]	143	76.2237762238	0.465373335136	1.62766213776e-19
MLF1	myeloid leukemia factor 1 [Source:HGNC Symbol;Acc:7125]	143	79.7202797203	0.464986555248	1.75922442889e-19
HOXC10	homeobox C10 [Source:HGNC Symbol;Acc:5122]	142	85.2112676056	0.464281734372	2.02640310604e-19

## Sheet: Discordant
Gene symbol	Description	# of experiments with MYOD1	%concordant	Pearson Coef	Pearson p-val.
MYOD1	myogenic differentiation 1 [Source:HGNC Symbol;Acc:7611]	337
SLC25A5	solute carrier family 25 (mitochondrial carrier; adenine nucleotide translocator), member 5 [Source:HGNC Symbol;Acc:10991]	115	6.08695652174	-0.62380306747	9.73727944969e-38
SPINT2	serine peptidase inhibitor, Kunitz type, 2 [Source:HGNC Symbol;Acc:11247]	167	5.38922155689	-0.612714190059	4.08200418667e-36
PRPS2	phosphoribosyl pyrophosphate synthetase 2 [Source:HGNC Symbol;Acc:9465]	154	9.09090909091	-0.590616741593	4.56490721487e-33
KRT18	keratin 18 [Source:HGNC Symbol;Acc:6430]	174	17.2413793103	-0.580228905496	1.03083674056e-31
CLU	clusterin [Source:HGNC Symbol;Acc:2095]	160	15.0	-0.572144577376	1.08074608388e-30
PPAP2C	phosphatidic acid phosphatase type 2C [Source:HGNC Symbol;Acc:9230]	131	10.6870229008	-0.556457113126	8.62034440492e-29
EPS8L2	EPS8-like 2 [Source:HGNC Symbol;Acc:21296]	101	5.94059405941	-0.54976462152	5.20761030899e-28
RPL3	ribosomal protein L3 [Source:HGNC Symbol;Acc:10332]	78	3.84615384615	-0.547858559313	8.62791788721e-28
NIPSNAP1	nipsnap homolog 1 (C. elegans) [Source:HGNC Symbol;Acc:7827]	129	20.1550387597	-0.543826235494	2.48414847475e-27
MAL2	mal, T-cell differentiation protein 2 (gene/pseudogene) [Source:HGNC Symbol;Acc:13634]	95	17.8947368421	-0.542485090398	3.52014960571e-27
CDH1	cadherin 1, type 1, E-cadherin (epithelial) [Source:HGNC Symbol;Acc:1748]	134	12.6865671642	-0.538091767651	1.0907794888e-26
SEH1L	SEH1-like (S. cerevisiae) [Source:HGNC Symbol;Acc:30379]	109	12.8440366972	-0.536167992542	1.78056899334e-26
TKT	transketolase [Source:HGNC Symbol;Acc:11834]	148	12.8378378378	-0.534492164367	2.72171150904e-26
PPIB	peptidylprolyl isomerase B (cyclophilin B) [Source:HGNC Symbol;Acc:9255]	128	14.0625	-0.534094886072	3.00869647178e-26
F11R	F11 receptor [Source:HGNC Symbol;Acc:14685]	127	8.66141732283	-0.533327489604	3.65015843478e-26
OCLN	occludin [Source:HGNC Symbol;Acc:8104]	110	10.0	-0.53299989163	3.96348508386e-26
LGALS3BP	lectin, galactoside-binding, soluble, 3 binding protein [Source:HGNC Symbol;Acc:6564]	125	8.0	-0.526438030537	2.02454065661e-25
PTPRF	protein tyrosine phosphatase, receptor type, F [Source:HGNC Symbol;Acc:9670]	175	21.7142857143	-0.521754258859	6.34624599898e-25
UMPS	uridine monophosphate synthetase [Source:HGNC Symbol;Acc:12563]	98	7.14285714286	-0.52102494797	7.5698721985e-25
PTPN6	protein tyrosine phosphatase, non-receptor type 6 [Source:HGNC Symbol;Acc:9658]	128	10.9375	-0.520312389481	8.98924163934e-25
C19ORF10	C19ORF10	81	7.40740740741	-0.513568982439	4.48127273247e-24
KIAA1598	KIAA1598 [Source:HGNC Symbol;Acc:29319]	91	7.69230769231	-0.513366087096	4.70059949118e-24
EDEM1	ER degradation enhancer, mannosidase alpha-like 1 [Source:HGNC Symbol;Acc:18967]	133	11.2781954887	-0.511120746139	7.95937087277e-24
FKBP11	FK506 binding protein 11, 19 kDa [Source:HGNC Symbol;Acc:18624]	131	19.8473282443	-0.510910797176	8.35947650608e-24
SLC12A7	solute carrier family 12 (potassium/chloride transporters), member 7 [Source:HGNC Symbol;Acc:10915]	121	16.5289256198	-0.508520441746	1.45765803598e-23
MAP7	microtubule-associated protein 7 [Source:HGNC Symbol;Acc:6869]	126	16.6666666667	-0.50827765008	1.5419720539e-23
KRT8	keratin 8 [Source:HGNC Symbol;Acc:6446]	164	13.4146341463	-0.506484987485	2.33230665395e-23
KCNK1	potassium channel, subfamily K, member 1 [Source:HGNC Symbol;Acc:6272]	133	18.045112782	-0.50549935422	2.92510453045e-23
PRKCZ	protein kinase C, zeta [Source:HGNC Symbol;Acc:9412]	125	16.0	-0.505092317042	3.21119259228e-23
SH3BGRL2	SH3 domain binding glutamic acid-rich protein like 2 [Source:HGNC Symbol;Acc:15567]	98	7.14285714286	-0.504191713856	3.94583047014e-23
ZWINT	ZW10 interactor [Source:HGNC Symbol;Acc:13195]	133	17.2932330827	-0.501362578491	7.5073298075e-23
ARPC5	actin related protein 2/3 complex, subunit 5, 16kDa [Source:HGNC Symbol;Acc:708]	100	9.0	-0.501169279884	7.84290523147e-23
DSC2	desmocollin 2 [Source:HGNC Symbol;Acc:3036]	110	12.7272727273	-0.500140571742	9.89336648079e-23
SLC33A1	solute carrier family 33 (acetyl-CoA transporter), member 1 [Source:HGNC Symbol;Acc:95]	90	2.22222222222	-0.49991542089	1.04081889662e-22
SLC25A13	solute carrier family 25 (aspartate/glutamate carrier), member 13 [Source:HGNC Symbol;Acc:10983]	126	12.6984126984	-0.496700790428	2.1387291477e-22
BTG3	BTG family, member 3 [Source:HGNC Symbol;Acc:1132]	105	6.66666666667	-0.496607918297	2.18344945683e-22
SNX10	sorting nexin 10 [Source:HGNC Symbol;Acc:14974]	94	12.7659574468	-0.496444604769	2.26433433728e-22
DNAJC3	DnaJ (Hsp40) homolog, subfamily C, member 3 [Source:HGNC Symbol;Acc:9439]	120	7.5	-0.496423764529	2.27486605749e-22
TMED3	transmembrane emp24 protein transport domain containing 3 [Source:HGNC Symbol;Acc:28889]	107	15.8878504673	-0.494893609024	3.1955640264e-22
PTPLB	protein tyrosine phosphatase-like (proline instead of catalytic arginine), member b [Source:HGNC Symbol;Acc:9640]	111	9.90990990991	-0.49461029229	3.40246478479e-22
GALNT7	UDP-N-acetyl-alpha-D-galactosamine:polypeptide N-acetylgalactosaminyltransferase 7 (GalNAc-T7) [Source:HGNC Symbol;Acc:4129]	129	19.3798449612	-0.489928683064	9.51405661836e-22
PAWR	PRKC, apoptosis, WT1, regulator [Source:HGNC Symbol;Acc:8614]	138	18.8405797101	-0.489847012563	9.68490614295e-22
ADAR	adenosine deaminase, RNA-specific [Source:HGNC Symbol;Acc:225]	110	14.5454545455	-0.489241360307	1.10497542118e-21
PRSS8	protease, serine, 8 [Source:HGNC Symbol;Acc:9491]	116	10.3448275862	-0.48898860976	1.16738344815e-21
BAIAP2L1	BAI1-associated protein 2-like 1 [Source:HGNC Symbol;Acc:21649]	94	13.829787234	-0.487728207951	1.53428759172e-21
C3ORF14	C3ORF14	80	8.75	-0.48613789813	2.16256428101e-21
GMDS	GDP-mannose 4,6-dehydratase [Source:HGNC Symbol;Acc:4369]	97	17.5257731959	-0.483668904738	3.67160681996e-21
RIPK4	receptor-interacting serine-threonine kinase 4 [Source:HGNC Symbol;Acc:496]	121	15.7024793388	-0.481202258539	6.20401894074e-21
DAPK1	death-associated protein kinase 1 [Source:HGNC Symbol;Acc:2674]	113	16.814159292	-0.481024235672	6.44234424027e-21
SIPA1L1	signal-induced proliferation-associated 1 like 1 [Source:HGNC Symbol;Acc:20284]	92	16.3043478261	-0.480667126211	6.94791612991e-21
PABPC1	poly(A) binding protein, cytoplasmic 1 [Source:HGNC Symbol;Acc:8554]	122	27.0491803279	-0.473876321488	2.8742553812e-20
CXADR	coxsackie virus and adenovirus receptor [Source:HGNC Symbol;Acc:2559]	157	26.7515923567	-0.472925512255	3.497657096e-20
P2RX4	purinergic receptor P2X, ligand-gated ion channel, 4 [Source:HGNC Symbol;Acc:8535]	131	18.320610687	-0.472556924253	3.77358640125e-20
SDF2L1	stromal cell-derived factor 2-like 1 [Source:HGNC Symbol;Acc:10676]	103	15.5339805825	-0.471884947575	4.33284003121e-20
NME7	NME/NM23 family member 7 [Source:HGNC Symbol;Acc:20461]	97	5.15463917526	-0.469274765807	7.39015064485e-20
MYO6	myosin VI [Source:HGNC Symbol;Acc:7605]	108	10.1851851852	-0.468877221381	8.01301698304e-20
SERP1	stress-associated endoplasmic reticulum protein 1 [Source:HGNC Symbol;Acc:10759]	168	24.4047619048	-0.468647362623	8.39642842065e-20
EML4	echinoderm microtubule associated protein like 4 [Source:HGNC Symbol;Acc:1316]	85	16.4705882353	-0.466748611802	1.23363507532e-19
CGNL1	cingulin-like 1 [Source:HGNC Symbol;Acc:25931]	90	17.7777777778	-0.465998444099	1.43521176813e-19
DSP	desmoplakin [Source:HGNC Symbol;Acc:3052]	165	32.7272727273	-0.465909210921	1.46124752463e-19
HYOU1	hypoxia up-regulated 1 [Source:HGNC Symbol;Acc:16931]	124	21.7741935484	-0.465905173013	1.46243659754e-19
DSG2	desmoglein 2 [Source:HGNC Symbol;Acc:3049]	137	17.5182481752	-0.465628474467	1.54622612565e-19
CKLFSF6	CKLFSF6	32	0.0	-0.463902164995	2.18642944164e-19
ZNF544	zinc finger protein 544 [Source:HGNC Symbol;Acc:16759]	35	0.0	-0.46285347548	2.69601531025e-19
PGRMC1	progesterone receptor membrane component 1 [Source:HGNC Symbol;Acc:16090]	146	25.3424657534	-0.460243194284	4.52732440307e-19
SLC39A8	solute carrier family 39 (zinc transporter), member 8 [Source:HGNC Symbol;Acc:20862]	159	20.1257861635	-0.459116139708	5.65519855958e-19
KIF3B	kinesin family member 3B [Source:HGNC Symbol;Acc:6320]	64	15.625	-0.458490503286	6.39617894638e-19
PGAM1	phosphoglycerate mutase 1 (brain) [Source:HGNC Symbol;Acc:8888]	131	18.320610687	-0.4580617649	6.95826908987e-19
ST14	suppression of tumorigenicity 14 (colon carcinoma) [Source:HGNC Symbol;Acc:11344]	88	13.6363636364	-0.457809681826	7.31114339206e-19
HIAT1	hippocampus abundant transcript 1 [Source:HGNC Symbol;Acc:23363]	79	3.79746835443	-0.457434715844	7.86881510594e-19
MGC8902,LOC200030	MGC8902,LOC200030	27	0.0	-0.456701681328	9.08249892116e-19
BLNK	B-cell linker [Source:HGNC Symbol;Acc:14211]	96	17.7083333333	-0.456692948656	9.09801369915e-19
PRPSAP2	phosphoribosyl pyrophosphate synthetase-associated protein 2 [Source:HGNC Symbol;Acc:9467]	92	8.69565217391	-0.455745294572	1.09460515702e-18
C1ORF41	C1ORF41	28	0.0	-0.455413549965	1.16765042748e-18
PGM2	phosphoglucomutase 2 [Source:HGNC Symbol;Acc:8906]	52	13.4615384615	-0.455098675627	1.24140423102e-18
PGM3	phosphoglucomutase 3 [Source:HGNC Symbol;Acc:8907]	80	5.0	-0.453586105388	1.66460511464e-18
LOC157697	LOC157697	32	6.25	-0.45347365456	1.7012073964e-18
DJ328E19.C1.1	DJ328E19.C1.1	30	0.0	-0.452183415861	2.18217592737e-18
RASL11B	RAS-like, family 11, member B [Source:HGNC Symbol;Acc:23804]	115	15.652173913	-0.452082007234	2.22520078481e-18
DOCK8	dedicator of cytokinesis 8 [Source:HGNC Symbol;Acc:19191]	104	17.3076923077	-0.452074443307	2.22844315921e-18
CDS1	CDP-diacylglycerol synthase (phosphatidate cytidylyltransferase) 1 [Source:HGNC Symbol;Acc:1800]	115	13.0434782609	-0.451851192164	2.32626206044e-18
FLJ12975	FLJ12975	33	6.06060606061	-0.451098820164	2.68802649676e-18
UNC119	unc-119 homolog (C. elegans) [Source:HGNC Symbol;Acc:12565]	89	12.3595505618	-0.451032277503	2.72256418583e-18
C2ORF26	C2ORF26	35	5.71428571429	-0.446695544642	6.21908317993e-18
PDXK	pyridoxal (pyridoxine, vitamin B6) kinase [Source:HGNC Symbol;Acc:8819]	110	12.7272727273	-0.4459153522	7.20650536977e-18
TGOLN2	trans-golgi network protein 2 [Source:HGNC Symbol;Acc:15450]	105	20.0	-0.445037428534	8.50243941419e-18
CLDN7	claudin 7 [Source:HGNC Symbol;Acc:2049]	135	21.4814814815	-0.444750025652	8.97448541415e-18
BASP1	brain abundant, membrane attached signal protein 1 [Source:HGNC Symbol;Acc:957]	86	18.6046511628	-0.444012696218	1.03064687642e-17
FGFR2	fibroblast growth factor receptor 2 [Source:HGNC Symbol;Acc:3689]	149	37.5838926174	-0.443970071154	1.03891456451e-17
C16ORF44	C16ORF44	29	0.0	-0.443828137807	1.06691684785e-17
FKBP2	FK506 binding protein 2, 13kDa [Source:HGNC Symbol;Acc:3718]	94	9.57446808511	-0.44375649984	1.08133067387e-17
KIAA0753	KIAA0753 [Source:HGNC Symbol;Acc:29110]	46	2.17391304348	-0.443140729197	1.21337908635e-17
SLC9A3R1	solute carrier family 9, subfamily A (NHE3, cation proton antiporter 3), member 3 regulator 1 [Source:HGNC Symbol;Acc:11075]	132	12.8787878788	-0.442461023671	1.37756507795e-17
YWHAQ	tyrosine 3-monooxygenase/tryptophan 5-monooxygenase activation protein, theta polypeptide [Source:HGNC Symbol;Acc:12854]	166	22.2891566265	-0.442312974036	1.41612220744e-17
ACTG1	actin, gamma 1 [Source:HGNC Symbol;Acc:144]	108	23.1481481481	-0.442020083696	1.49554978347e-17
COTL1	coactosin-like 1 (Dictyostelium) [Source:HGNC Symbol;Acc:18304]	134	28.3582089552	-0.441535931994	1.63654288933e-17
IRAK4	interleukin-1 receptor-associated kinase 4 [Source:HGNC Symbol;Acc:17967]	45	0.0	-0.440980621703	1.81437785102e-17
CHKA	choline kinase alpha [Source:HGNC Symbol;Acc:1937]	129	21.7054263566	-0.439346179612	2.45534934675e-17
LOC400986	LOC400986	33	0.0	-0.439036456423	2.59974549957e-17
TRAM1	translocation associated membrane protein 1 [Source:HGNC Symbol;Acc:20568]	121	19.0082644628	-0.438748601467	2.74140619985e-17
MAPK13	mitogen-activated protein kinase 13 [Source:HGNC Symbol;Acc:6875]	88	19.3181818182	-0.437283035415	3.58882219297e-17
BID	BH3 interacting domain death agonist [Source:HGNC Symbol;Acc:1050]	143	26.5734265734	-0.437185261003	3.65372606017e-17
CASP6	caspase 6, apoptosis-related cysteine peptidase [Source:HGNC Symbol;Acc:1507]	123	13.8211382114	-0.436826057692	3.90221688829e-17
PTPRA	protein tyrosine phosphatase, receptor type, A [Source:HGNC Symbol;Acc:9664]	101	11.8811881188	-0.432505989571	8.55735216981e-17
SFXN1	sideroflexin 1 [Source:HGNC Symbol;Acc:16085]	159	12.5786163522	-0.4321747593	9.08419423819e-17
IGJ	immunoglobulin J polypeptide, linker protein for immunoglobulin alpha and mu polypeptides [Source:HGNC Symbol;Acc:5713]	99	9.09090909091	-0.430687023017	1.18707624665e-16
SQLE	squalene epoxidase [Source:HGNC Symbol;Acc:11279]	159	36.4779874214	-0.430531068055	1.22074683603e-16
GNB1	guanine nucleotide binding protein (G protein), beta polypeptide 1 [Source:HGNC Symbol;Acc:4396]	146	21.9178082192	-0.430232713373	1.28779383022e-16
SPINT1	serine peptidase inhibitor, Kunitz type 1 [Source:HGNC Symbol;Acc:11246]	100	12.0	-0.428867192839	1.64373426085e-16
RHPN2	rhophilin, Rho GTPase binding protein 2 [Source:HGNC Symbol;Acc:19974]	90	6.66666666667	-0.428498945902	1.7552187255e-16
MYEF2	myelin expression factor 2 [Source:HGNC Symbol;Acc:17940]	101	20.7920792079	-0.428327648669	1.80957489345e-16
EPSTI1	epithelial stromal interaction 1 (breast) [Source:HGNC Symbol;Acc:16465]	75	12.0	-0.426482256282	2.51069054604e-16
SNX14	sorting nexin 14 [Source:HGNC Symbol;Acc:14977]	41	2.43902439024	-0.425774308144	2.84525562544e-16
MARVELD2	MARVEL domain containing 2 [Source:HGNC Symbol;Acc:26401]	72	15.2777777778	-0.424039527646	3.86109639693e-16
RAB8A	RAB8A, member RAS oncogene family [Source:HGNC Symbol;Acc:7007]	100	11.0	-0.422486172969	5.0674268975e-16
ETNK1	ethanolamine kinase 1 [Source:HGNC Symbol;Acc:24649]	104	15.3846153846	-0.42175348704	5.75798955253e-16
MID1	midline 1 (Opitz/BBB syndrome) [Source:HGNC Symbol;Acc:7095]	83	24.0963855422	-0.421607708102	5.90600796478e-16
ID2	inhibitor of DNA binding 2, dominant negative helix-loop-helix protein [Source:HGNC Symbol;Acc:5361]	178	30.8988764045	-0.421131145377	6.41641348251e-16
RDH11	retinol dehydrogenase 11 (all-trans/9-cis/11-cis) [Source:HGNC Symbol;Acc:17964]	115	19.1304347826	-0.421108276934	6.44196457779e-16
MANBA	mannosidase, beta A, lysosomal [Source:HGNC Symbol;Acc:6831]	62	4.83870967742	-0.421020096103	6.54142745145e-16
GNAI3	guanine nucleotide binding protein (G protein), alpha inhibiting activity polypeptide 3 [Source:HGNC Symbol;Acc:4387]	119	26.0504201681	-0.419062530603	9.18101500607e-16
TJP2	tight junction protein 2 (zona occludens 2) [Source:HGNC Symbol;Acc:11828]	117	17.094017094	-0.419039146562	9.21814425634e-16
ODF2	outer dense fiber of sperm tails 2 [Source:HGNC Symbol;Acc:8114]	93	17.2043010753	-0.41873488565	9.71488415955e-16
PI4K2B	phosphatidylinositol 4-kinase type 2 beta [Source:HGNC Symbol;Acc:18215]	89	8.98876404494	-0.417512228837	1.19895323061e-15
LRRC1	leucine rich repeat containing 1 [Source:HGNC Symbol;Acc:14307]	102	10.7843137255	-0.417484772454	1.20461894604e-15
MEIS2	Meis homeobox 2 [Source:HGNC Symbol;Acc:7001]	139	28.0575539568	-0.416904233601	1.33075219581e-15
RAB27A	RAB27A, member RAS oncogene family [Source:HGNC Symbol;Acc:9766]	137	29.9270072993	-0.415951108501	1.56646081924e-15
PLCG2	phospholipase C, gamma 2 (phosphatidylinositol-specific) [Source:HGNC Symbol;Acc:9066]	90	13.3333333333	-0.415913361475	1.57659344537e-15
SS18	synovial sarcoma translocation, chromosome 18 [Source:HGNC Symbol;Acc:11340]	142	19.7183098592	-0.415565002513	1.673190297e-15
COX6A1	cytochrome c oxidase subunit VIa polypeptide 1 [Source:HGNC Symbol;Acc:2277]	140	18.5714285714	-0.415495043351	1.69327755083e-15
FADS1	fatty acid desaturase 1 [Source:HGNC Symbol;Acc:3574]	113	20.3539823009	-0.414690992414	1.9418168912e-15
CELSR1	cadherin, EGF LAG seven-pass G-type receptor 1 (flamingo homolog, Drosophila) [Source:HGNC Symbol;Acc:1850]	106	23.5849056604	-0.41342276377	2.40825555329e-15
ELOVL5	ELOVL fatty acid elongase 5 [Source:HGNC Symbol;Acc:21308]	141	24.8226950355	-0.412781734689	2.68416457377e-15
KRT7	keratin 7 [Source:HGNC Symbol;Acc:6445]	110	20.9090909091	-0.412623970452	2.75668491388e-15
FAIM	Fas apoptotic inhibitory molecule [Source:HGNC Symbol;Acc:18703]	96	11.4583333333	-0.411486213772	3.33967600469e-15
PLEKHA5	pleckstrin homology domain containing, family A member 5 [Source:HGNC Symbol;Acc:30036]	113	28.3185840708	-0.410173308789	4.16346309508e-15
ITM2C	integral membrane protein 2C [Source:HGNC Symbol;Acc:6175]	100	18.0	-0.407983771698	6.00075259575e-15
TCN2	transcobalamin II [Source:HGNC Symbol;Acc:11653]	102	13.7254901961	-0.407675702527	6.31609806366e-15
SFRS9	SFRS9	73	12.3287671233	-0.406220513989	8.03907952166e-15
SLC35B3	solute carrier family 35, member B3 [Source:HGNC Symbol;Acc:21601]	50	0.0	-0.406141487749	8.14480567931e-15
CHST11	carbohydrate (chondroitin 4) sulfotransferase 11 [Source:HGNC Symbol;Acc:17422]	99	40.404040404	-0.404929076411	9.94829190071e-15
PTTG1IP	pituitary tumor-transforming 1 interacting protein [Source:HGNC Symbol;Acc:13524]	113	16.814159292	-0.40481559515	1.01358750568e-14
CDC42SE1	CDC42 small effector 1 [Source:HGNC Symbol;Acc:17719]	90	22.2222222222	-0.404767214452	1.0216897245e-14
TUSC3	tumor suppressor candidate 3 [Source:HGNC Symbol;Acc:30242]	106	26.4150943396	-0.404664836598	1.03904447806e-14
BNIP3L	BCL2/adenovirus E1B 19kDa interacting protein 3-like [Source:HGNC Symbol;Acc:1085]	116	25.8620689655	-0.404580416199	1.05357210556e-14
MARCKSL1	MARCKS-like 1 [Source:HGNC Symbol;Acc:7142]	147	28.5714285714	-0.402326037108	1.52427502751e-14
SUSD3	sushi domain containing 3 [Source:HGNC Symbol;Acc:28391]	55	7.27272727273	-0.401859885638	1.64466981192e-14
PCK2	phosphoenolpyruvate carboxykinase 2 (mitochondrial) [Source:HGNC Symbol;Acc:8725]	126	24.6031746032	-0.400709777364	1.98296323721e-14
PYGL	phosphorylase, glycogen, liver [Source:HGNC Symbol;Acc:9725]	142	31.6901408451	-0.400397874044	2.08588953092e-14
ISG20	interferon stimulated exonuclease gene 20kDa [Source:HGNC Symbol;Acc:6130]	99	19.1919191919	-0.399508025657	2.40914635713e-14
UGCG	UDP-glucose ceramide glucosyltransferase [Source:HGNC Symbol;Acc:12524]	158	25.9493670886	-0.399170192705	2.54430802465e-14
TCF21	transcription factor 21 [Source:HGNC Symbol;Acc:11632]	105	20.9523809524	-0.399124348388	2.56321248195e-14
HM13	histocompatibility (minor) 13 [Source:HGNC Symbol;Acc:16435]	81	19.7530864198	-0.398680560918	2.75347041557e-14
ACAT2	acetyl-CoA acetyltransferase 2 [Source:HGNC Symbol;Acc:94]	129	30.2325581395	-0.397659290609	3.24536503697e-14
SERPINB9	serpin peptidase inhibitor, clade B (ovalbumin), member 9 [Source:HGNC Symbol;Acc:8955]	113	19.4690265487	-0.397510600188	3.32380855903e-14
SLC35A3	solute carrier family 35 (UDP-N-acetylglucosamine (UDP-GlcNAc) transporter), member A3 [Source:HGNC Symbol;Acc:11023]	121	9.9173553719	-0.39747335728	3.34374541595e-14
PAPSS1	3'-phosphoadenosine 5'-phosphosulfate synthase 1 [Source:HGNC Symbol;Acc:8603]	127	29.9212598425	-0.393633752562	6.16951079335e-14
UGDH	UDP-glucose 6-dehydrogenase [Source:HGNC Symbol;Acc:12525]	129	31.7829457364	-0.393495118455	6.30654137865e-14
SOAT1	sterol O-acyltransferase 1 [Source:HGNC Symbol;Acc:11177]	141	26.2411347518	-0.393372897306	6.42981614057e-14
GANAB	glucosidase, alpha; neutral AB [Source:HGNC Symbol;Acc:4138]	92	16.3043478261	-0.392788298343	7.05283459981e-14
NFKBIZ	nuclear factor of kappa light polypeptide gene enhancer in B-cells inhibitor, zeta [Source:HGNC Symbol;Acc:29805]	99	22.2222222222	-0.392522255799	7.35556414684e-14
SPTLC2	serine palmitoyltransferase, long chain base subunit 2 [Source:HGNC Symbol;Acc:11278]	82	23.1707317073	-0.389066685687	1.26532691727e-13
CDK5RAP3	CDK5 regulatory subunit associated protein 3 [Source:HGNC Symbol;Acc:18673]	89	11.2359550562	-0.388890431083	1.3006044594e-13
DBNL	drebrin-like [Source:HGNC Symbol;Acc:2696]	62	9.67741935484	-0.38840103257	1.40367962885e-13
KIT	v-kit Hardy-Zuckerman 4 feline sarcoma viral oncogene homolog [Source:HGNC Symbol;Acc:6342]	133	27.8195488722	-0.387774270224	1.54741678406e-13
ICA1	islet cell autoantigen 1, 69kDa [Source:HGNC Symbol;Acc:5343]	128	15.625	-0.387608337244	1.58782045272e-13
AACS	acetoacetyl-CoA synthetase [Source:HGNC Symbol;Acc:21298]	84	11.9047619048	-0.387313042695	1.66229004024e-13
ATP1B3	ATPase, Na+/K+ transporting, beta 3 polypeptide [Source:HGNC Symbol;Acc:806]	111	15.3153153153	-0.38708791299	1.72134958905e-13

## Sheet: Concordant KEGG pathways
Group	P-value
hsa05410:Hypertrophic cardiomyopathy (HCM)	1.17510299148e-09
hsa04260:Cardiac muscle contraction	2.57207053476e-08
hsa05414:Dilated cardiomyopathy	3.60729780927e-08
hsa05412:Arrhythmogenic right ventricular cardiomyopathy (ARVC)	1.08215073081e-07
hsa04910:Insulin signaling pathway	8.98992169488e-06
hsa04530:Tight junction	2.26064520854e-05
hsa04020:Calcium signaling pathway	0.000138904356458
hsa00030:Pentose phosphate pathway	0.000634523618848
hsa05012:Parkinson's disease	0.00108974106777
hsa00500:Starch and sucrose metabolism	0.00132388704871
hsa04670:Leukocyte transendothelial migration	0.0015180303144
hsa00010:Glycolysis / Gluconeogenesis	0.0015346811453
hsa05130:Pathogenic Escherichia coli infection	0.00558801839403
hsa05416:Viral myocarditis	0.00792145910414
hsa04920:Adipocytokine signaling pathway	0.0147266997675
hsa01040:Biosynthesis of unsaturated fatty acids	0.018934651403
hsa05010:Alzheimer's disease	0.0192373059429
hsa00520:Amino sugar and nucleotide sugar metabolism	0.0319282632418
hsa05016:Huntington's disease	0.0320256727023

## Sheet: Concordant COG Ontology
Group	P-value
Cytoskeleton	0.0153284604447
General function prediction only	0.0155163026598
Signal transduction mechanisms	0.0173947812516
Cell division and chromosome partitioning	0.0173947812516

## Sheet: Concordant TISSUE
Group	P-value
Skeletal muscle	2.57951416394e-73
Heart	1.24099803639e-14
Muscle	6.7177781444e-14
Liver	1.21368874646e-06
Heart muscle	0.000561412961385
Brain	0.000574672086305
Tongue	0.00396844163804
Milk	0.00515807968696
Platelet	0.00709592551062
Cervix	0.00873273254303
PNS	0.00925095914891
Fetal brain cortex	0.0102024846724
Astrocytoma	0.0124888174405
B-cell lymphoma	0.0126974464803
Adipose	0.0158225947214
Fetal skeletal muscle	0.0194900205494
Kidney	0.0249707322448
Placenta	0.040991211984
Skin	0.0437178929725
Muscle pool- 2 tissues- cardiac and skeletal muscle.	0.0437210471463
Epithelium	0.044129843099
Colon carcinoma	0.0450183549786
